# Supplementary material for: An intestinal microRNA modulates the homeostatic adaptation to chronic oxidative stress in C. elegans
Source: Aging (Albany NY). 2016 Sep 12;8(9):1979–96. doi: 10.18632/aging.101029 (PMC5076448; doi:10.18632/aging.101029)
Supplement: Supplementary file 2 [file aging-08-1979-s002.xlsx]

## Sheet: S2_Predicted_Targets_miR-60
WormBase_ID	Gene_Sequence_Name	TargetScan	mirWIP	miRanda	PicTar	RNA22	DIANAmicroT	Total
WBGene00044061	R11B5.1	1	1	1	1	1	1	6
WBGene00006776	T19B4.7	1	1	1	1	1	1	6
WBGene00004373	W06H8.1	1	1	1	1	1	1	6
WBGene00003568	ZC168.1	1	1	1	1	1	1	6
WBGene00003478	F53A2.8	1	1	1	1	1	1	6
WBGene00003153	Y67D8C.10	1	1	1	1	1	1	6
WBGene00002256	ZK742.5	1	1	1	1	1	1	6
WBGene00000942	ZC477.9	1	1	1	1	1	1	6
WBGene00000472	F33A8.3	1	1	1	1	1	1	6
WBGene00000018	M79.1	1	1	1	1	1	1	6
WBGene00045192	K04G2.2	1	1	1	1	1		5
WBGene00012204	W02B12.9	1	1		1	1	1	5
WBGene00022697	ZK353.1	1		1	1	1	1	5
WBGene00021093	W08F4.3	1	1	1	1		1	5
WBGene00019008	F57C9.1	1	1	1	1		1	5
WBGene00018369	F42H10.5	1	1	1		1	1	5
WBGene00018017	F33G12.5	1	1	1	1	1		5
WBGene00017053	D2024.5	1	1	1	1		1	5
WBGene00015632	C09D4.1	1		1	1	1	1	5
WBGene00012359	W09D10.1	1		1	1	1	1	5
WBGene00011531	T06D10.1	1		1	1	1	1	5
WBGene00011481	T05E11.5	1		1	1	1	1	5
WBGene00011224	R10H10.6	1	1		1	1	1	5
WBGene00010670	K08E4.6	1	1	1	1		1	5
WBGene00006805	F55C7.7	1		1	1	1	1	5
WBGene00006599	B0545.1	1		1	1	1	1	5
WBGene00006504	R13A1.2	1	1	1	1	1		5
WBGene00006406	F12F6.5	1		1	1	1	1	5
WBGene00006367	ZK1067.6	1	1	1		1	1	5
WBGene00004364	Y22F5A.3	1		1	1	1	1	5
WBGene00004270	T25G12.4	1		1	1	1	1	5
WBGene00004208	ZK675.1	1	1	1		1	1	5
WBGene00004036	F31B12.1	1		1	1	1	1	5
WBGene00003997	ZK455.7	1		1	1	1	1	5
WBGene00003613	T01B10.4	1	1	1	1		1	5
WBGene00003407	F57C12.5	1		1	1	1	1	5
WBGene00001628	ZK688.8	1		1	1	1	1	5
WBGene00001145	C16C2.2	1	1	1	1		1	5
WBGene00000530	E04F6.11	1		1	1	1	1	5
WBGene00000417	C48D1.2	1	1	1	1	1		5
WBGene00000175	M02F4.8	1	1	1		1	1	5
WBGene00009744	F45H11.3	1		1		1	1	4
WBGene00016162	C27D6.4	1	1	1	1			4
WBGene00009440	F35G12.2	1		1	1		1	4
WBGene00019726	M02B7.5	1		1	1	1		4
WBGene00007384	C06G8.1	1	1	1			1	4
WBGene00015778	C14F11.1	1		1	1		1	4
WBGene00015676	C10E2.6	1			1	1	1	4
WBGene00018974	F56D12.6	1		1	1		1	4
WBGene00044325	C33H5.19	1		1	1		1	4
WBGene00022882	ZK1248.13	1		1		1	1	4
WBGene00022603	ZC404.9	1		1	1	1		4
WBGene00022532	ZC155.4	1		1		1	1	4
WBGene00022010	Y59H11AR.2	1		1		1	1	4
WBGene00021395	Y38C1AA.3	1	1	1		1		4
WBGene00021320	Y34B4A.4			1	1	1	1	4
WBGene00021011	W03G1.5	1	1		1		1	4
WBGene00019841	R02F11.3	1		1		1	1	4
WBGene00019780	M60.4	1		1	1		1	4
WBGene00019077	F59A3.4	1		1	1		1	4
WBGene00018952	F56C9.8	1		1	1		1	4
WBGene00018656	F49H12.5	1		1		1	1	4
WBGene00018370	F42H10.6	1		1		1	1	4
WBGene00018317	F41H10.4	1	1	1			1	4
WBGene00017724	F22F7.7	1	1	1	1			4
WBGene00016983	C56G2.15	1		1	1	1		4
WBGene00015754	C14B9.8	1		1		1	1	4
WBGene00014172	ZK970.2	1	1	1	1			4
WBGene00013859	ZC247.1		1	1		1	1	4
WBGene00013718	Y106G6H.5	1		1		1	1	4
WBGene00013416	Y64G10A.7	1			1	1	1	4
WBGene00012983	Y48B6A.12	1		1	1		1	4
WBGene00012894	Y46G5A.1	1		1	1		1	4
WBGene00012868	Y45F10A.6	1	1	1		1		4
WBGene00012543	Y37A1C.1	1		1		1	1	4
WBGene00012206	W02B12.11	1		1	1	1		4
WBGene00012002	T24H10.4	1		1	1		1	4
WBGene00011970	T23G11.5	1		1	1		1	4
WBGene00011645	T09B9.4	1	1	1	1			4
WBGene00009628	F42D1.2	1		1		1	1	4
WBGene00009094	F23H12.5	1		1		1	1	4
WBGene00008750	F13E9.1	1		1	1		1	4
WBGene00008480	E04D5.1	1		1	1		1	4
WBGene00008419	D2030.9	1		1		1	1	4
WBGene00008274	C53B4.4		1	1		1	1	4
WBGene00008110	C46C2.2	1		1		1	1	4
WBGene00007984	C36F7.1	1	1	1			1	4
WBGene00007935	C34E11.2		1	1		1	1	4
WBGene00007296	C04C11.2	1		1	1	1		4
WBGene00006914	F35H10.4	1		1		1	1	4
WBGene00006839	F09B9.2	1		1	1		1	4
WBGene00006819	F08B6.4	1	1	1			1	4
WBGene00006405	Y116A8C.36	1		1		1	1	4
WBGene00006379	T23D8.9	1	1	1			1	4
WBGene00004348	B0336.4	1		1		1	1	4
WBGene00004336	W06A7.3	1		1		1	1	4
WBGene00004276	K09A9.2	1	1		1	1		4
WBGene00003915	M88.6	1		1	1		1	4
WBGene00003159	F32D1.10	1		1		1	1	4
WBGene00002979	C46H11.4	1		1	1		1	4
WBGene00002129	K02B2.4	1		1	1		1	4
WBGene00002053	F10C1.2	1		1		1	1	4
WBGene00001837	C10E2.3	1		1		1	1	4
WBGene00001646	B0024.12	1		1	1		1	4
WBGene00001620	C12D12.2	1		1		1	1	4
WBGene00001580	F28D1.10	1		1		1	1	4
WBGene00001516	ZK899.8	1		1		1	1	4
WBGene00001502	F52D10.3	1		1	1		1	4
WBGene00001082	R160.1	1		1	1		1	4
WBGene00001045	Y47H9C.5		1	1		1	1	4
WBGene00001005	T26A5.9	1	1	1		1		4
WBGene00000961	T21B6.1	1		1	1		1	4
WBGene00000419	C02F4.1	1		1		1	1	4
WBGene00000293	M106.5	1		1	1		1	4
WBGene00000237	Y71F9AR.1	1			1	1	1	4
WBGene00000171	Y69E1A.7	1	1		1		1	4
WBGene00000161	T20B5.1	1		1	1		1	4
WBGene00000136	C05E11.5	1		1	1	1		4
WBGene00007215	C01A2.3		1	1		1		3
WBGene00020251	T05C1.4			1	1		1	3
WBGene00003888	R07G3.6	1		1			1	3
WBGene00018364	F42G9.6			1		1	1	3
WBGene00004132	F56F3.1	1		1			1	3
WBGene00017951	F31E3.4			1		1	1	3
WBGene00014015	ZK632.7	1		1	1			3
WBGene00012646	Y39A1A.7	1		1	1			3
WBGene00007514	C10C6.6	1		1	1			3
WBGene00009842	F48C5.1	1		1			1	3
WBGene00022647	ZK54.1	1	1	1				3
WBGene00044297	C25B8.8	1		1			1	3
WBGene00022880	ZK1248.10	1		1		1		3
WBGene00022668	ZK154.6	1		1			1	3
WBGene00022593	ZC328.3	1		1	1			3
WBGene00022252	Y73B6BL.31	1		1			1	3
WBGene00021036	W05F2.4	1		1		1		3
WBGene00020740	T23F4.2	1		1		1		3
WBGene00020069	R13H7.2			1		1	1	3
WBGene00020036	R12E2.11	1		1			1	3
WBGene00019867	R04B3.2		1		1	1		3
WBGene00019807	R01B10.5	1		1			1	3
WBGene00019781	M60.6	1		1			1	3
WBGene00019730	M02D8.4			1	1		1	3
WBGene00019717	M01H9.1	1			1		1	3
WBGene00019608	K10B2.5	1		1		1		3
WBGene00019572	K09E2.3	1		1			1	3
WBGene00019504	K07H8.2	1		1	1			3
WBGene00018995	F56H1.5			1		1	1	3
WBGene00018878	F55D10.3	1		1			1	3
WBGene00018857	F55A4.5		1	1		1		3
WBGene00018786	F54A5.1	1		1			1	3
WBGene00018152	F37C12.7				1	1	1	3
WBGene00017751	F23F12.3	1		1	1			3
WBGene00017583	F19B10.1			1		1	1	3
WBGene00017361	F10E9.12	1		1			1	3
WBGene00016803	C50C3.8	1		1			1	3
WBGene00016626	C44B7.4	1		1			1	3
WBGene00016624	C44B7.2	1		1		1		3
WBGene00016400	C34D4.4	1		1			1	3
WBGene00016395	C34B2.10	1		1			1	3
WBGene00015940	C18A3.2	1				1	1	3
WBGene00015547	C06G1.4	1				1	1	3
WBGene00014013	ZK632.4	1		1			1	3
WBGene00013496	Y70D2A.1	1	1			1		3
WBGene00013382	Y62E10A.16	1		1		1		3
WBGene00012317	W06H12.1			1		1	1	3
WBGene00012128	T28F3.1	1		1		1		3
WBGene00012106	T27F6.7	1		1			1	3
WBGene00012033	T26C5.3			1		1	1	3
WBGene00011725	T12A7.4		1	1		1		3
WBGene00011629	T08G11.1	1		1		1		3
WBGene00011528	T06D8.7		1	1		1		3
WBGene00011250	R11H6.2	1		1		1		3
WBGene00011218	R10E11.6			1		1	1	3
WBGene00010976	R02D5.1	1		1			1	3
WBGene00010975	R01H10.7	1		1		1		3
WBGene00010795	M01A8.1	1			1		1	3
WBGene00010592	K06A4.2		1	1	1			3
WBGene00010453	K01B6.1	1		1			1	3
WBGene00010199	F57C7.1	1		1			1	3
WBGene00010096	F55C5.7	1		1			1	3
WBGene00009642	F42G4.5	1			1		1	3
WBGene00008800	F14E5.2			1		1	1	3
WBGene00008622	F09C8.2	1		1		1		3
WBGene00008587	F08G12.3	1		1			1	3
WBGene00008486	F01D4.2	1		1			1	3
WBGene00008415	D2030.5		1	1		1		3
WBGene00008246	C50H2.13	1			1		1	3
WBGene00008166	C47G2.5	1		1			1	3
WBGene00008136	C47D12.2	1		1			1	3
WBGene00008120	C46F11.5	1		1		1		3
WBGene00007606	C15C8.4	1		1	1			3
WBGene00007480	C09F9.3		1		1	1		3
WBGene00007372	C06B8.7	1		1		1		3
WBGene00007339	C05D12.1	1		1			1	3
WBGene00007268	C03A3.3	1			1	1		3
WBGene00007089	B0001.4	1	1			1		3
WBGene00006852	C53D6.2	1		1			1	3
WBGene00006769	Y37E11C.1	1		1			1	3
WBGene00006528	F26E4.8	1	1	1				3
WBGene00006437	K08B12.5	1		1		1		3
WBGene00006064	F32A6.5	1		1			1	3
WBGene00005655	K11D12.3	1		1			1	3
WBGene00005011	F26F4.8			1		1	1	3
WBGene00004876	K11G12.4	1		1		1		3
WBGene00004736	K11D9.2	1		1		1		3
WBGene00004498	B0412.4	1		1	1			3
WBGene00004356	F46H6.1		1	1		1		3
WBGene00004272	D1037.4	1		1			1	3
WBGene00004034	F09E5.1	1		1	1			3
WBGene00003646	F44C8.6			1		1	1	3
WBGene00003627	F58G6.5	1		1		1		3
WBGene00003196	C06C3.1	1		1		1		3
WBGene00003012	F18A1.2	1		1			1	3
WBGene00002084	F13B12.5	1		1			1	3
WBGene00002074	F32E10.4	1		1		1		3
WBGene00001978	R13H4.4	1		1		1		3
WBGene00001862	ZK381.1		1	1		1		3
WBGene00001682	F08B6.2	1		1			1	3
WBGene00001466	F58H1.4	1	1		1			3
WBGene00001443	B0523.5			1		1	1	3
WBGene00001434	T14G12.4	1		1			1	3
WBGene00001426	F36H1.1	1		1			1	3
WBGene00001215	Y53H1C.2			1		1	1	3
WBGene00001182	T22B7.1	1		1			1	3
WBGene00001020	B0035.2	1		1		1		3
WBGene00000930	ZC373.6	1		1			1	3
WBGene00000914	F33H1.1		1	1		1		3
WBGene00000549	R107.6	1		1	1			3
WBGene00000537	C07H6.6	1		1		1		3
WBGene00000441	ZC64.3	1		1			1	3
WBGene00000426	Y106G6E.5			1		1	1	3
WBGene00000396	F25F2.2			1		1	1	3
WBGene00000292	D2024.6	1			1		1	3
WBGene00000115	F01F1.6	1		1	1			3
WBGene00000112	F56D12.1	1		1	1			3
WBGene00000101	D1022.7	1		1			1	3
WBGene00000089	Y87G2A.4	1		1			1	3
WBGene00000085	T14B1.2	1		1			1	3
WBGene00011064	R06C7.5		1			1		2
WBGene00008781	F14B4.3			1		1		2
WBGene00014101	ZK849.2			1		1		2
WBGene00015286	C01B12.3			1		1		2
WBGene00020168	T02G5.12			1		1		2
WBGene00012980	Y48B6A.6			1		1		2
WBGene00007242	C01G12.1			1		1		2
WBGene00018794	F54C4.3		1			1		2
WBGene00010813	M01F1.7			1		1		2
WBGene00016139	C26E6.3			1		1		2
WBGene00017755	F23F12.9			1		1		2
WBGene00018319	F41H10.6			1		1		2
WBGene00015217	B0496.8			1		1		2
WBGene00019503	K07H8.1			1		1		2
WBGene00011239	R11A8.5	1					1	2
WBGene00010892	M18.8		1			1		2
WBGene00012541	Y37A1B.8		1			1		2
WBGene00022776	ZK616.6			1		1		2
WBGene00022251	Y73B6BL.30			1		1		2
WBGene00011891	T21C9.3			1		1		2
WBGene00017080	DC2.3	1		1				2
WBGene00016509	C37H5.6	1		1				2
WBGene00010075	F55A11.1	1					1	2
WBGene00010259	F58E10.1			1		1		2
WBGene00016865	C52B9.2		1			1		2
WBGene00016984	C56G3.1			1		1		2
WBGene00007635	C16D6.2				1	1		2
WBGene00044071	D2021.2			1		1		2
WBGene00009665	F43G9.2	1					1	2
WBGene00018474	F45E12.1	1		1				2
WBGene00016200	C28H8.9	1		1				2
WBGene00000448	K12H4.1	1		1				2
WBGene00011522	T06D8.1			1		1		2
WBGene00010012	F53H10.2			1		1		2
WBGene00021209	Y18H1A.3			1		1		2
WBGene00003936	gei-16	1		1				2
WBGene00003242	ppn-1	1		1				2
WBGene00003878	opt-3	1		1				2
WBGene00010685	tag-216	1		1				2
WBGene00045067	F07C6.6			1			1	2
WBGene00044698	K09F5.6			1		1		2
WBGene00044508	C18F3.4	1		1				2
WBGene00022766	ZK546.17	1		1				2
WBGene00022427	Y104H12D.3		1			1		2
WBGene00022369	Y92H12BR.3			1		1		2
WBGene00022310	Y77E11A.7			1		1		2
WBGene00022268	Y73E7A.1			1		1		2
WBGene00022235	Y73B6BL.6		1			1		2
WBGene00022069	Y67D8C.5			1		1		2
WBGene00022015	Y61A9LA.3			1		1		2
WBGene00021595	Y46E12BL.2			1		1		2
WBGene00021539	Y42H9AR.4			1		1		2
WBGene00021538	Y42H9AR.3			1		1		2
WBGene00021419	Y38F2AR.1			1		1		2
WBGene00021375	Y37E11B.2			1		1		2
WBGene00021294	Y25C1A.7	1		1				2
WBGene00021281	Y24D9A.1		1			1		2
WBGene00021192	Y14H12B.2			1			1	2
WBGene00021153	Y4C6A.3			1			1	2
WBGene00021095	W08F4.6	1		1				2
WBGene00020962	W02H5.8			1		1		2
WBGene00020948	W02F12.3			1		1		2
WBGene00020738	T23F2.5	1					1	2
WBGene00020652	T21E3.1		1			1		2
WBGene00020540	T17A3.2			1		1		2
WBGene00020487	T13C5.7			1			1	2
WBGene00020391	T10B5.5	1		1				2
WBGene00020250	T05C1.3	1					1	2
WBGene00020107	R151.2		1			1		2
WBGene00020093	R144.3		1			1		2
WBGene00020068	R13F6.10	1					1	2
WBGene00019882	R05D3.9			1		1		2
WBGene00019786	M70.4			1		1		2
WBGene00019763	M03F8.4			1		1		2
WBGene00019759	M03F4.6			1		1		2
WBGene00019679	K12H4.4	1		1				2
WBGene00019247	H27M09.3			1		1		2
WBGene00019234	H23N18.3		1			1		2
WBGene00019196	H14A12.3	1		1				2
WBGene00019124	F59E12.9			1		1		2
WBGene00019102	F59C12.3	1		1				2
WBGene00019087	F59A6.5			1		1		2
WBGene00019078	F59A3.5	1					1	2
WBGene00019003	F57B10.5			1		1		2
WBGene00018998	F57B9.7	1					1	2
WBGene00018969	F56D3.1			1			1	2
WBGene00018869	F55C12.1	1		1				2
WBGene00018836	F54F2.9			1		1		2
WBGene00018735	F53B1.2	1					1	2
WBGene00018720	F53A3.1			1		1		2
WBGene00018701	F52E4.1	1		1				2
WBGene00018682	F52D1.1			1		1		2
WBGene00018603	F48E3.2			1		1		2
WBGene00018600	F48C1.8		1			1		2
WBGene00018579	F47G6.2	1		1				2
WBGene00018566	F47E1.2			1		1		2
WBGene00018533	F47B7.2	1					1	2
WBGene00018403	F44A2.3	1		1				2
WBGene00018285	F41E6.4			1		1		2
WBGene00018217	F40A3.2	1		1				2
WBGene00017998	F33D4.6			1		1		2
WBGene00017888	F28B3.9			1		1		2
WBGene00017782	F25E5.1			1		1		2
WBGene00017654	F21C10.4		1			1		2
WBGene00017446	F14B8.4		1		1			2
WBGene00017429	F13D11.4	1		1				2
WBGene00017385	F11G11.5			1		1		2
WBGene00017293	F09E5.17	1					1	2
WBGene00017079	D2096.12			1		1		2
WBGene00017003	D1007.5			1	1			2
WBGene00016996	D1005.2			1		1		2
WBGene00016960	C56C10.1	1					1	2
WBGene00016836	C50F2.2			1		1		2
WBGene00016726	C46H3.3		1			1		2
WBGene00016605	C43E11.5			1		1		2
WBGene00016573	C41H7.3			1			1	2
WBGene00016407	C34D10.2	1		1				2
WBGene00016343	C33D12.2		1			1		2
WBGene00016317	C32D5.10			1		1		2
WBGene00016190	C28G1.5			1		1		2
WBGene00016188	C28G1.3	1		1				2
WBGene00016157	C27A12.7			1		1		2
WBGene00016124	C26B2.1			1		1		2
WBGene00016120	C25H3.11		1			1		2
WBGene00016111	C25H3.1			1		1		2
WBGene00016038	C24A8.4		1			1		2
WBGene00016033	C24A3.2			1		1		2
WBGene00015920	C17G10.9	1		1				2
WBGene00015822	C16B8.2			1		1		2
WBGene00015814	C16A3.10			1			1	2
WBGene00015646	C09E8.3		1	1				2
WBGene00015356	C02F12.7	1		1				2
WBGene00015267	BE0003N10.2		1	1				2
WBGene00015172	B0410.3	1		1				2
WBGene00015088	B0252.3	1		1				2
WBGene00015062	B0228.5			1			1	2
WBGene00015048	B0218.2				1		1	2
WBGene00015007	B0041.2			1		1		2
WBGene00014204	ZK1058.4			1		1		2
WBGene00014181	ZK1010.8			1			1	2
WBGene00014127	ZK892.3		1			1		2
WBGene00014098	ZK836.2			1		1		2
WBGene00014014	ZK632.5			1		1		2
WBGene00013964	ZK287.3			1		1		2
WBGene00013872	ZC374.2	1	1					2
WBGene00013847	ZC84.3		1			1		2
WBGene00013716	Y106G6H.1	1		1				2
WBGene00013709	Y106G6E.6	1		1				2
WBGene00013601	Y87G2A.13			1		1		2
WBGene00013557	Y75B8A.24		1			1		2
WBGene00013440	Y66D12A.14		1			1		2
WBGene00013319	Y57G11C.25			1			1	2
WBGene00013156	Y53F4B.9			1		1		2
WBGene00013081	Y51A2D.14			1			1	2
WBGene00013080	Y51A2D.13			1		1		2
WBGene00012934	Y47D3A.23			1		1		2
WBGene00012908	Y46G5A.18			1		1		2
WBGene00012907	Y46G5A.17	1		1				2
WBGene00012810	Y43F8A.3			1		1		2
WBGene00012562	Y37H2A.1			1		1		2
WBGene00012553	Y37D8A.14			1		1		2
WBGene00012528	Y32F6A.3			1		1		2
WBGene00012527	Y32F6A.1			1		1		2
WBGene00012423	Y10G11A.1	1					1	2
WBGene00012348	W08G11.4			1		1		2
WBGene00012202	W02B12.4				1	1		2
WBGene00012117	T28B11.1		1			1		2
WBGene00012085	T27D12.1		1	1				2
WBGene00011990	T24D5.2			1		1		2
WBGene00011908	T22A3.5			1		1		2
WBGene00011857	T20D3.3			1		1		2
WBGene00011797	T16G1.3		1			1		2
WBGene00011590	T07F10.4	1			1			2
WBGene00011502	T05G5.8			1		1		2
WBGene00011437	T04F3.2	1			1			2
WBGene00011376	T02E1.3			1		1		2
WBGene00011352	T01H8.1			1		1		2
WBGene00011338	T01G1.3	1		1				2
WBGene00011306	R186.3	1		1				2
WBGene00011287	R90.5			1		1		2
WBGene00011283	R90.1			1		1		2
WBGene00011279	R74.5	1		1				2
WBGene00011276	R53.7	1		1				2
WBGene00010977	R02D5.3			1		1		2
WBGene00010810	M01F1.4	1					1	2
WBGene00010782	K11H3.5	1			1			2
WBGene00010740	K10D3.6			1			1	2
WBGene00010567	K04G2.9	1					1	2
WBGene00010501	K02C4.2			1		1		2
WBGene00010406	H19N07.2			1		1		2
WBGene00010353	H02I12.5			1		1		2
WBGene00010351	H02I12.1	1		1				2
WBGene00010175	F56H11.2			1			1	2
WBGene00010113	F55D12.5			1		1		2
WBGene00010064	F54F7.2			1		1		2
WBGene00009920	F52B5.1	1					1	2
WBGene00009919	F52A8.6	1		1				2
WBGene00009917	F52A8.4			1		1		2
WBGene00009783	F46C5.8			1		1		2
WBGene00009621	F41E7.5			1		1		2
WBGene00009532	F38B7.1			1		1		2
WBGene00009500	F36H2.3			1		1		2
WBGene00009484	F36G3.3				1	1		2
WBGene00009307	F32A11.1			1		1		2
WBGene00009261	F30A10.2			1		1		2
WBGene00009237	F28H7.3		1				1	2
WBGene00009190	F27D4.6		1	1				2
WBGene00009027	F21G4.6			1		1		2
WBGene00009006	F21D5.1			1		1		2
WBGene00008989	F20G2.6			1		1		2
WBGene00008951	F19C6.2		1			1		2
WBGene00008832	F14H8.1			1		1		2
WBGene00008776	F13H10.5		1		1			2
WBGene00008686	F11A10.5			1		1		2
WBGene00008682	F11A10.1			1		1		2
WBGene00008666	F10G8.8			1		1		2
WBGene00008610	F09C3.2			1		1		2
WBGene00008603	F09B9.4	1				1		2
WBGene00008589	F08G12.8	1					1	2
WBGene00008449	E01G6.1			1		1		2
WBGene00008361	D1043.1			1		1		2
WBGene00008339	C55A6.10			1		1		2
WBGene00008298	C54D10.3			1			1	2
WBGene00008239	C50H2.1			1		1		2
WBGene00008027	C39E9.2			1			1	2
WBGene00008018	C38H2.1			1		1		2
WBGene00007982	C36E8.3			1			1	2
WBGene00007944	C34F6.10			1		1		2
WBGene00007907	C34B4.2	1					1	2
WBGene00007799	C29A12.4			1		1		2
WBGene00007694	C23H4.6			1		1		2
WBGene00007652	C17G1.5			1		1		2
WBGene00007599	C15A11.7			1		1		2
WBGene00007550	C13C4.6			1			1	2
WBGene00007545	C13B4.1			1		1		2
WBGene00007520	C11E4.6			1		1		2
WBGene00007329	C05C10.2		1			1		2
WBGene00007216	C01A2.4			1		1		2
WBGene00007058	F13G11.1	1					1	2
WBGene00006888	Y54E10A.9		1		1			2
WBGene00006875	T22C8.8			1			1	2
WBGene00006844	D1081.2			1		1		2
WBGene00006836	C47E8.7			1		1		2
WBGene00006833	F53F10.4			1		1		2
WBGene00006829	K11D2.3			1			1	2
WBGene00006785	T07A5.2		1			1		2
WBGene00006759	ZK617.1			1		1		2
WBGene00006757	F27D9.1			1		1		2
WBGene00006755	ZK1098.10			1		1		2
WBGene00006746	F41C6.1			1		1		2
WBGene00006736	T10F2.3		1	1				2
WBGene00006705	Y94H6A.6	1			1			2
WBGene00006654	C40H5.5			1		1		2
WBGene00006614	ZC21.2			1		1		2
WBGene00006602	ZK54.2	1					1	2
WBGene00006543	F21H11.3	1		1				2
WBGene00006538	B0272.1		1	1				2
WBGene00006483	F42A9.1			1		1		2
WBGene00006478	H38K22.3			1		1		2
WBGene00006423	T21G5.5	1					1	2
WBGene00006359	B0336.9			1		1		2
WBGene00006063	F08C6.4			1			1	2
WBGene00006062	F30A10.8			1		1		2
WBGene00005941	Y43B11AL.2			1			1	2
WBGene00005447	F37B4.13		1			1		2
WBGene00005025	C52E12.3	1		1				2
WBGene00005022	F29F11.1			1		1		2
WBGene00005021	R10E11.4			1		1		2
WBGene00004974	F25H8.7		1			1		2
WBGene00004912	T08A9.3			1		1		2
WBGene00004862	T05A10.1			1		1		2
WBGene00004780	C09B7.1	1		1				2
WBGene00004505	F56H1.4		1			1		2
WBGene00004457	C01B7.6			1		1		2
WBGene00004405	C12D8.11	1		1				2
WBGene00004370	C53B7.1			1		1		2
WBGene00004319	ZK593.4			1		1		2
WBGene00004267	C18A3.6	1		1				2
WBGene00004264	T05C12.10			1		1		2
WBGene00004214	F59G1.5			1		1		2
WBGene00004187	C50C3.6			1		1		2
WBGene00004183	F45H7.4			1		1		2
WBGene00004167	Y57A10A.18		1			1		2
WBGene00004166	Y43H11AL.3			1		1		2
WBGene00004154	W01B11.5	1		1				2
WBGene00004068	C10G11.5	1					1	2
WBGene00004004	C54D1.1			1		1		2
WBGene00003970	F46C3.1			1		1		2
WBGene00003921	T26E3.3			1		1		2
WBGene00003827	C49H3.5	1		1				2
WBGene00003822	F59A6.1			1		1		2
WBGene00003818	H15N14.2			1		1		2
WBGene00003802	Y56A3A.17	1		1				2
WBGene00003798	T23H2.1			1		1		2
WBGene00003767	B0213.4			1			1	2
WBGene00003732	F14B8.1	1		1				2
WBGene00003687	H27C11.1			1		1		2
WBGene00003663	C27C7.4			1		1		2
WBGene00003634	T19A5.4			1		1		2
WBGene00003633	C29E6.5	1		1				2
WBGene00003479	Y39H10A.3			1			1	2
WBGene00003476	T24A11.1			1		1		2
WBGene00003423	R10E9.1			1		1		2
WBGene00003408	F57C12.4			1			1	2
WBGene00003185	K08A8.1		1			1		2
WBGene00003177	T01E8.4			1			1	2
WBGene00003150	F49E11.1	1					1	2
WBGene00003086	Y37A1B.2			1		1		2
WBGene00003085	Y37A1B.1			1		1		2
WBGene00003052	DY3.2			1		1		2
WBGene00003044	F18A1.3			1		1		2
WBGene00003041	R06C7.7			1		1		2
WBGene00002975	C35C5.5			1		1		2
WBGene00002299	ZK1067.1	1		1				2
WBGene00002280	F01G12.5	1		1				2
WBGene00002267	C44F1.3			1			1	2
WBGene00002266	ZK892.1			1		1		2
WBGene00002251	B0457.1			1		1		2
WBGene00002235	Y54G9A.3	1		1				2
WBGene00002224	F22F4.3			1		1		2
WBGene00002218	R144.1			1		1		2
WBGene00002215	C18C4.10			1		1		2
WBGene00002192	C10C6.1			1		1		2
WBGene00002177	F35C8.3			1			1	2
WBGene00002176	F56D12.4			1		1		2
WBGene00002132	T18H9.5	1			1			2
WBGene00002123	C16E9.4			1		1		2
WBGene00002081	F54G8.3			1		1		2
WBGene00002064	T05G5.10	1		1				2
WBGene00002047	Y39G10AR.13			1		1		2
WBGene00002023	C09B8.6	1		1				2
WBGene00002010	C37H5.8	1		1				2
WBGene00001812	F43E2.4			1		1		2
WBGene00001743	K06H7.4	1		1				2
WBGene00001685	K10B3.7			1		1		2
WBGene00001665	E02C12.5			1			1	2
WBGene00001648	C26C6.2	1					1	2
WBGene00001645	C03E10.4			1			1	2
WBGene00001565	C14B9.6			1		1		2
WBGene00001501	D1037.3	1		1				2
WBGene00001484	T07D1.4			1		1		2
WBGene00001446	W07E11.2	1					1	2
WBGene00001251	K02B9.4	1		1				2
WBGene00001249	W09C2.1		1	1				2
WBGene00001224	ZK1248.3	1		1				2
WBGene00001160	F42A10.4			1		1		2
WBGene00001101	C34F11.9			1			1	2
WBGene00001077	Y47D3B.10	1		1				2
WBGene00001071	T21D12.2			1		1		2
WBGene00001043	W07A8.3			1		1		2
WBGene00001026	C56C10.13	1		1				2
WBGene00001007	C39E9.14			1		1		2
WBGene00000935	F56D1.7		1			1		2
WBGene00000908	F11A1.3		1			1		2
WBGene00000832	Y23H5A.5			1		1		2
WBGene00000812	Y48G1C.2			1		1		2
WBGene00000784	F44C4.3			1		1		2
WBGene00000772	B0414.5			1		1		2
WBGene00000726	F17C11.3		1			1		2
WBGene00000634	F26B1.4			1		1		2
WBGene00000628	T28F2.8		1			1		2
WBGene00000591	K08A8.3			1		1		2
WBGene00000567	ZK632.6			1		1		2
WBGene00000547	Y77E11A.11			1		1		2
WBGene00000466	C03D6.3			1		1		2
WBGene00000421	C48B4.4	1		1				2
WBGene00000403	B0034.3			1		1		2
WBGene00000390	R07G3.1		1			1		2
WBGene00000383	C17G10.4			1			1	2
WBGene00000274	F15D4.1			1		1		2
WBGene00000228	W04D2.1			1		1		2
WBGene00000186	C01C7.1	1		1				2
WBGene00000159	F29G9.3			1		1		2
WBGene00000157	F02E8.3	1		1				2
WBGene00000146	F46F3.4		1			1		2
WBGene00000140	ZK973.6			1		1		2
WBGene00000086	C02H7.3			1		1		2
WBGene00000080	T20H4.4			1		1		2
WBGene00000079	H15N14.1			1		1		2
WBGene00000004	F52H2.2			1			1	2
WBGene00010334	F59F3.4					1		1
WBGene00003516	C43E11.6				1			1
WBGene00020190	T03F1.8			1				1
WBGene00018512	F46F11.9			1				1
WBGene00020375	T09B4.1			1				1
WBGene00020693	T22E7.1			1				1
WBGene00007256	C01H6.7			1				1
WBGene00011232	R11A5.4		1					1
WBGene00009664	F43G9.1			1				1
WBGene00010730	K10C3.2	1						1
WBGene00013695	Y106G6A.2			1				1
WBGene00008664	F10G8.6			1				1
WBGene00012211	W02D9.5			1				1
WBGene00016304	C32B5.11			1				1
WBGene00017393	F12A10.4		1					1
WBGene00015061	B0228.4				1			1
WBGene00011510	T05H10.6			1				1
WBGene00010681	K08F8.1			1				1
WBGene00010912	M106.4						1	1
WBGene00010758	K10H10.1			1				1
WBGene00016409	C34E10.8			1				1
WBGene00018340	F42A10.3						1	1
WBGene00015732	C13B9.1			1				1
WBGene00017163	F01F1.9			1				1
WBGene00012759	Y41C4A.13			1				1
WBGene00009732	F45G2.4			1				1
WBGene00019441	K06B9.4			1				1
WBGene00016739	C48A7.2			1				1
WBGene00009881	F49C12.12	1						1
WBGene00008033	C39E9.10			1				1
WBGene00008772	F13G11.2		1					1
WBGene00015055	B0222.3			1				1
WBGene00007756	C27A7.5				1			1
WBGene00010383	H12D21.7		1					1
WBGene00008181	C48G7.1				1			1
WBGene00013024	Y49A3A.1			1				1
WBGene00016614	C43H6.1			1				1
WBGene00020214	T04G9.1			1				1
WBGene00016995	D1005.1		1					1
WBGene00016344	C33D12.6			1				1
WBGene00019612	K10B3.6			1				1
WBGene00015354	C02F12.3			1				1
WBGene00015666	C10A4.5			1				1
WBGene00018886	F55E10.7			1				1
WBGene00009025	F21G4.4			1				1
WBGene00007261	C02C6.3			1				1
WBGene00007524	C11G6.3						1	1
WBGene00006771	Y71G12B.11			1				1
WBGene00021826	Y54E10A.3			1				1
WBGene00022004	Y59H11AL.1			1				1
WBGene00006373	syn-3			1				1
WBGene00019323	tag-203			1				1
WBGene00006495	tag-149			1				1
WBGene00011190	R10D12.9			1				1
WBGene00015061	tag-308			1				1
WBGene00021305	Y32G9A.8			1				1
WBGene00013583	dlx-1			1				1
WBGene00012690	Y39B6A.31		1					1
WBGene00021368	Y37E11AR.1		1					1
WBGene00013011	Y48E1B.14				1			1
WBGene00022190	Y71H2AR.3						1	1
WBGene00014095	ZK829.4						1	1
WBGene00185092	K08D8.7						1	1
WBGene00044533	F41F3.8						1	1
WBGene00044156	Y66C5A.1						1	1
WBGene00044024	C35A5.11						1	1
WBGene00022825	ZK816.1			1				1
WBGene00022734	ZK418.5			1				1
WBGene00022464	Y110A7A.19			1				1
WBGene00022434	Y108G3AL.2		1					1
WBGene00022415	Y102A11A.5			1				1
WBGene00022385	Y95B8A.4		1					1
WBGene00022381	Y94H6A.9			1				1
WBGene00022303	Y76B12C.9			1				1
WBGene00022270	Y73E7A.3						1	1
WBGene00022185	Y71H2AM.20			1				1
WBGene00022159	Y71G12B.24			1				1
WBGene00022106	Y71D11A.5			1				1
WBGene00022087	Y69A2AR.16			1				1
WBGene00022036	Y65B4BL.4			1				1
WBGene00021980	Y58A7A.6		1					1
WBGene00021897	Y54G2A.35			1				1
WBGene00021845	Y54E10BR.6			1				1
WBGene00021721	Y49F6B.9			1				1
WBGene00021632	Y47D9A.5			1				1
WBGene00021629	Y47D9A.2			1				1
WBGene00021613	Y47A7.1			1				1
WBGene00021528	Y41G9A.4			1				1
WBGene00021335	Y34D9A.11			1				1
WBGene00021322	Y34B4A.6			1				1
WBGene00021262	Y22D7AR.9			1				1
WBGene00021259	Y22D7AR.5		1					1
WBGene00021247	Y22D7AL.9			1				1
WBGene00021206	Y17G9B.9			1				1
WBGene00021205	Y17G9B.8			1				1
WBGene00021070	W07B8.1			1				1
WBGene00021056	W06B4.1			1				1
WBGene00021046	W05H7.3		1					1
WBGene00021044	W05H7.1			1				1
WBGene00021020	W04B5.3			1				1
WBGene00021009	W03F11.6						1	1
WBGene00020941	W02D7.5		1					1
WBGene00020906	T28H11.8			1				1
WBGene00020867	T27F7.2		1					1
WBGene00020798	T25D3.4		1					1
WBGene00020732	T23E7.2			1				1
WBGene00020690	T22E5.1		1					1
WBGene00020631	T20F7.3		1					1
WBGene00020612	T20D4.6			1				1
WBGene00020579	T19D12.4			1				1
WBGene00020508	T14F9.2			1				1
WBGene00020500	T14B4.3			1				1
WBGene00020462	T12E12.1			1				1
WBGene00020426	T10H10.2			1				1
WBGene00020425	T10H9.3			1				1
WBGene00020396	T10B5.10			1				1
WBGene00020322	T07F12.2		1					1
WBGene00020317	T07E3.6			1				1
WBGene00020256	T05C3.6						1	1
WBGene00020218	T04G9.7			1				1
WBGene00020110	R151.7			1				1
WBGene00020097	R144.7		1					1
WBGene00020050	R13A5.7			1				1
WBGene00020026	R12C12.6			1				1
WBGene00019992	R10A10.1				1			1
WBGene00019956	R08C7.13			1				1
WBGene00019843	R03E9.2			1				1
WBGene00019801	PAR2.3			1				1
WBGene00019792	M116.5			1				1
WBGene00019636	K10F12.4			1				1
WBGene00019623	K10C9.1			1				1
WBGene00019602	K09H11.5				1			1
WBGene00019537	K08D12.3			1				1
WBGene00019520	K08B12.1			1				1
WBGene00019482	K07C11.10			1				1
WBGene00019426	K06A1.3			1				1
WBGene00019369	K03H6.4						1	1
WBGene00019220	H20J04.5			1				1
WBGene00019212	H19M22.3						1	1
WBGene00019180	H10D18.5		1					1
WBGene00019079	F59A3.6			1				1
WBGene00019075	F59A3.2			1				1
WBGene00018966	F56D2.5			1				1
WBGene00018937	F56B6.6			1				1
WBGene00018921	F56A6.1			1				1
WBGene00018897	F55F8.9			1				1
WBGene00018863	F55A12.2			1				1
WBGene00018777	F53H1.3			1				1
WBGene00018725	F53A9.2			1				1
WBGene00018717	F52H2.5			1				1
WBGene00018689	F52D2.7			1				1
WBGene00018519	F46H5.3		1					1
WBGene00018482	F45F2.10						1	1
WBGene00018375	F43C9.1			1				1
WBGene00018349	F42C5.9			1				1
WBGene00018245	F40G9.9		1					1
WBGene00018184	F38E9.1			1				1
WBGene00018075	F35H12.2			1				1
WBGene00017969	F32A5.3			1				1
WBGene00017967	F32A5.1			1				1
WBGene00017872	F28A10.4						1	1
WBGene00017866	F27D9.8			1				1
WBGene00017792	F25E5.16			1				1
WBGene00017780	F25E2.2			1				1
WBGene00017727	F22H10.3			1				1
WBGene00017691	F22A3.6			1				1
WBGene00017675	F21F3.6			1				1
WBGene00017644	F20D12.5			1				1
WBGene00017582	F18G5.6			1				1
WBGene00017434	F13H8.1			1				1
WBGene00017342	F10D7.5			1				1
WBGene00017335	F10D2.10						1	1
WBGene00017309	F09F9.4			1				1
WBGene00017307	F09F9.2			1				1
WBGene00017306	F09F9.1			1				1
WBGene00017301	F09F7.4			1				1
WBGene00017252	F08D12.9			1				1
WBGene00017166	F01F1.12			1				1
WBGene00017156	F01E11.3			1				1
WBGene00017073	D2096.6						1	1
WBGene00017068	D2092.8			1				1
WBGene00016939	C55B6.1			1				1
WBGene00016932	C54G6.3		1					1
WBGene00016911	C54A12.4		1					1
WBGene00016705	C46C11.2		1					1
WBGene00016678	C45G9.7			1				1
WBGene00016635	C44B11.6			1				1
WBGene00016599	C42D8.1					1		1
WBGene00016566	C41D11.7			1				1
WBGene00016494	C37A2.8		1					1
WBGene00016438	C35B8.3			1				1
WBGene00016367	C33G8.10						1	1
WBGene00016332	C32F10.4			1				1
WBGene00016311	C32D5.3			1				1
WBGene00016172	C27H5.2			1				1
WBGene00016160	C27D6.1			1				1
WBGene00016156	C27A12.6			1				1
WBGene00016150	C26F1.7			1				1
WBGene00016136	C26B9.7						1	1
WBGene00016088	C25B8.4			1				1
WBGene00016018	C23H3.2			1				1
WBGene00015974	C18E3.5			1				1
WBGene00015911	C17F4.3			1				1
WBGene00015910	C17F4.2			1				1
WBGene00015801	C15H9.5		1					1
WBGene00015777	C14F5.4						1	1
WBGene00015679	C10F3.7			1				1
WBGene00015540	C06E7.3			1				1
WBGene00015517	C06A8.8		1					1
WBGene00015480	C05D10.4			1				1
WBGene00015478	C05D10.2			1				1
WBGene00015361	C02H6.1		1					1
WBGene00015346	C02F5.3			1				1
WBGene00015251	B0546.4			1				1
WBGene00015207	B0495.8			1				1
WBGene00015186	B0432.4			1				1
WBGene00015176	B0414.8			1				1
WBGene00015167	B0403.3	1						1
WBGene00015163	B0361.9			1				1
WBGene00015129	B0303.8			1				1
WBGene00015085	B0244.10						1	1
WBGene00015037	B0212.3			1				1
WBGene00014228	ZK1128.2			1				1
WBGene00014192	ZK1037.4			1				1
WBGene00014164	ZK945.1		1					1
WBGene00014137	ZK896.6			1				1
WBGene00014125	ZK863.8			1				1
WBGene00013980	ZK507.4			1				1
WBGene00013963	ZK287.2			1				1
WBGene00013934	ZK131.11			1				1
WBGene00013917	ZC504.3			1				1
WBGene00013905	ZC455.5			1				1
WBGene00013752	Y113G7A.15						1	1
WBGene00013704	Y106G6D.8						1	1
WBGene00013606	Y102A5A.1		1					1
WBGene00013596	Y87G2A.7		1					1
WBGene00013482	Y69H2.7			1				1
WBGene00013380	Y62E10A.14			1				1
WBGene00013373	Y62E10A.2			1				1
WBGene00013364	Y60A3A.16			1				1
WBGene00013288	Y57A10C.10		1					1
WBGene00013025	Y49A3A.2		1					1
WBGene00012960	Y47H10A.4			1				1
WBGene00012850	Y44A6C.1			1				1
WBGene00012825	Y43F8C.3			1				1
WBGene00012812	Y43F8B.1			1				1
WBGene00012783	Y43C5A.3			1				1
WBGene00012781	Y43C5A.1			1				1
WBGene00012740	Y40B1B.8			1				1
WBGene00012658	Y39A1A.21			1				1
WBGene00012538	Y37A1B.5			1				1
WBGene00012484	Y18D10A.17			1				1
WBGene00012429	Y11D7A.5			1				1
WBGene00012420	Y7A9D.1			1				1
WBGene00012341	W08D2.5		1					1
WBGene00012313	W06G6.11			1				1
WBGene00012261	W04G3.8			1				1
WBGene00012220	W03C9.2			1				1
WBGene00012212	W02D9.6			1				1
WBGene00012198	W02B8.2			1				1
WBGene00012107	T27F6.8			1				1
WBGene00012101	T27F2.4	1						1
WBGene00012032	T26C5.2			1				1
WBGene00012019	T25E12.4			1				1
WBGene00012017	T25C8.1		1					1
WBGene00011978	T24B8.4			1				1
WBGene00011956	T23F11.4			1				1
WBGene00011915	T22C1.4			1				1
WBGene00011820	T18D3.1			1				1
WBGene00011731	T12D8.3			1				1
WBGene00011661	T09F3.1			1				1
WBGene00011630	T08G11.3		1					1
WBGene00011503	T05G5.9		1					1
WBGene00011501	T05G5.7			1				1
WBGene00011456	T05A1.5			1				1
WBGene00011431	T04D3.1			1				1
WBGene00011428	T04C12.3			1				1
WBGene00011383	T02E9.5		1					1
WBGene00011335	T01E8.8						1	1
WBGene00011313	T01B7.8						1	1
WBGene00011269	R17.3	1						1
WBGene00011257	R13.2				1			1
WBGene00011198	R10E4.1			1				1
WBGene00011082	R07B1.11			1				1
WBGene00011068	R06F6.4			1				1
WBGene00011054	R06B9.3			1				1
WBGene00010944	M176.5						1	1
WBGene00010929	M162.3		1					1
WBGene00010828	M02B1.3			1				1
WBGene00010827	M02B1.2	1						1
WBGene00010811	M01F1.5			1				1
WBGene00010757	K10G9.3			1				1
WBGene00010742	K10D6.2			1				1
WBGene00010724	K09E9.1			1				1
WBGene00010701	K09A9.3			1				1
WBGene00010691	K08H2.4			1				1
WBGene00010685	K08F9.2						1	1
WBGene00010666	K08E4.2			1				1
WBGene00010658	K08D8.4			1				1
WBGene00010537	K03D10.3			1				1
WBGene00010491	K02B7.3			1				1
WBGene00010479	K01G5.8		1					1
WBGene00010428	H38K22.2			1				1
WBGene00010374	H08M01.2		1					1
WBGene00010357	H03A11.2			1				1
WBGene00010236	F58B4.3			1				1
WBGene00010189	F57B1.6			1				1
WBGene00010178	F57A8.2			1				1
WBGene00010132	F55H2.7			1				1
WBGene00010130	F55H2.2		1					1
WBGene00010015	F54B3.3			1				1
WBGene00010008	F53H4.3		1					1
WBGene00010000	F53F8.3			1				1
WBGene00009980	F53F1.2			1				1
WBGene00009963	F53B6.8		1					1
WBGene00009926	F52B11.3						1	1
WBGene00009785	F46C5.10			1				1
WBGene00009729	F45E10.2			1				1
WBGene00009569	F40D4.9			1				1
WBGene00009550	F38H4.6		1					1
WBGene00009455	F36A2.8			1				1
WBGene00009374	F34D10.4			1				1
WBGene00009194	F27E5.5			1				1
WBGene00009184	F27C8.3			1				1
WBGene00008978	F20D1.8			1				1
WBGene00008926	F17H10.2			1				1
WBGene00008925	F17H10.1			1				1
WBGene00008913	F17C11.1			1				1
WBGene00008851	F15B9.8			1				1
WBGene00008825	F14H3.6			1				1
WBGene00008762	F13G3.1			1				1
WBGene00008710	F11E6.7			1				1
WBGene00008692	F11C1.3			1				1
WBGene00008621	F09C8.1						1	1
WBGene00008584	F08G5.6			1				1
WBGene00008559	F07H5.8			1				1
WBGene00008520	F02D8.1		1					1
WBGene00008511	F01G10.9			1				1
WBGene00008450	E01G6.2			1				1
WBGene00008390	D1086.3			1				1
WBGene00008379	D1054.13		1					1
WBGene00008341	C56A3.2			1				1
WBGene00008252	C51E3.6		1					1
WBGene00008218	C50B6.2			1				1
WBGene00008052	C41C4.7			1				1
WBGene00007979	C36B1.12			1				1
WBGene00007958	C35C5.9			1				1
WBGene00007955	C35C5.3			1				1
WBGene00007934	C34E7.4			1				1
WBGene00007928	C34C12.9				1			1
WBGene00007913	C34B7.3						1	1
WBGene00007908	C34B4.3			1				1
WBGene00007898	C33D9.3			1				1
WBGene00007877	C33A11.1			1				1
WBGene00007846	C31E10.5			1				1
WBGene00007841	C31C9.7			1				1
WBGene00007772	C27C12.2		1					1
WBGene00007753	C27A7.1			1				1
WBGene00007727	C25F9.8			1				1
WBGene00007718	C25D7.8			1				1
WBGene00007349	C05G5.3			1				1
WBGene00007332	C05C10.5			1				1
WBGene00007259	C02B4.3			1				1
WBGene00007223	C01F6.9			1				1
WBGene00007100	B0024.10			1				1
WBGene00007071	AC3.5			1				1
WBGene00006994	F22B5.7		1					1
WBGene00006988	F59E12.2			1				1
WBGene00006931	T20D3.7			1				1
WBGene00006928	F59D8.2			1				1
WBGene00006927	F59D8.1			1				1
WBGene00006925	K09F5.2			1				1
WBGene00006889	T06G6.9			1				1
WBGene00006886	F11C7.3			1				1
WBGene00006882	T22D2.1		1					1
WBGene00006868	M03A1.1			1				1
WBGene00006826	F14D12.2			1				1
WBGene00006816	F54B11.3			1				1
WBGene00006810	C04F6.4			1				1
WBGene00006795	Y50E8A.4			1				1
WBGene00006793	W09C5.2			1				1
WBGene00006754	F07A5.7		1					1
WBGene00006749	R12H7.1		1					1
WBGene00006743	Y16B4A.1		1					1
WBGene00006709	Y87G2A.9			1				1
WBGene00006708	Y54G2A.31			1				1
WBGene00006704	F58A4.10			1				1
WBGene00006673	C40C9.1		1					1
WBGene00006649	F08F1.8			1				1
WBGene00006646	B0198.1			1				1
WBGene00006638	T14G10.6			1				1
WBGene00006618	DY3.4						1	1
WBGene00006605	C15F1.3			1				1
WBGene00006565	Y63D3A.5			1				1
WBGene00006545	T07C4.2			1				1
WBGene00006476	T08H4.1			1				1
WBGene00006412	C40C9.5			1				1
WBGene00006112	F07C4.1		1					1
WBGene00006109	C42D4.4		1					1
WBGene00006087	C05E4.2			1				1
WBGene00006059	F54C9.2			1				1
WBGene00005981	H12C20.5		1					1
WBGene00005437	C04F2.4		1					1
WBGene00005429	C06B8.6			1				1
WBGene00005074	F37C12.16		1					1
WBGene00005020	Y110A2AL.14			1				1
WBGene00005018	F23H12.4		1					1
WBGene00004995	C28C12.7			1				1
WBGene00004920	Y71F9B.4			1				1
WBGene00004897	T10H9.4		1					1
WBGene00004885	Y73B6A.4			1				1
WBGene00004858	R12B2.1			1				1
WBGene00004854	F40E10.4			1				1
WBGene00004810	Y60A3A.18			1				1
WBGene00004809	F44G3.6			1				1
WBGene00004767	F55B12.3			1				1
WBGene00004743	M01D7.2			1				1
WBGene00004704	D2089.1			1				1
WBGene00004492	F28D1.7			1				1
WBGene00004461	F10G7.8		1					1
WBGene00004418	F53G12.10			1				1
WBGene00004395	C16D9.2			1				1
WBGene00004375	F46F6.1		1					1
WBGene00004369	K09E2.4			1				1
WBGene00004346	C29H12.3		1					1
WBGene00004342	C30A5.2					1		1
WBGene00004307	C27B7.8	1						1
WBGene00004241	F54C9.8		1					1
WBGene00004213	C48D5.2			1				1
WBGene00004138	R07B7.3		1					1
WBGene00004108	C34E7.1			1				1
WBGene00004046	F45E4.2			1				1
WBGene00004028	Y18H1A.6			1				1
WBGene00004013	F38A6.1			1				1
WBGene00003989	Y18D10A.20			1				1
WBGene00003958	F23B2.11			1				1
WBGene00003936	T17H7.4						1	1
WBGene00003878	F56F4.5						1	1
WBGene00003795	F59A2.1			1				1
WBGene00003779	Y75B8A.2			1				1
WBGene00003776	F52B10.1			1				1
WBGene00003742	F59C6.6						1	1
WBGene00003681	Y15E3A.1			1				1
WBGene00003658	H12C20.3			1				1
WBGene00003623	F11C1.6			1				1
WBGene00003599	W04H10.3			1				1
WBGene00003576	W01B6.9			1				1
WBGene00003522	K06A4.1			1				1
WBGene00003508	B0379.3						1	1
WBGene00003415	F58B3.5						1	1
WBGene00003372	C56G7.1		1					1
WBGene00003242	C37C3.6						1	1
WBGene00003167	F01D4.6			1				1
WBGene00003132	Y110A7A.17			1				1
WBGene00003083	T22A3.3			1				1
WBGene00003073	R74.1					1		1
WBGene00003034	F42A9.2			1				1
WBGene00002881	C05D11.4			1				1
WBGene00002783	F57B10.1			1				1
WBGene00002242	C53C9.3			1				1
WBGene00002146	C09B8.1			1				1
WBGene00002116	W09C5.4			1				1
WBGene00002071	T04G9.3			1				1
WBGene00002055	F37B4.2		1					1
WBGene00001972	F47D12.4						1	1
WBGene00001955	F58A4.7			1				1
WBGene00001892	K06C4.10			1				1
WBGene00001853	Y73B6BL.9			1				1
WBGene00001852	C30G7.1	1						1
WBGene00001814	W04C9.1			1				1
WBGene00001748	F56C9.1			1				1
WBGene00001717	ZC487.5		1					1
WBGene00001666	T07A9.7			1				1
WBGene00001661	C34E10.2			1				1
WBGene00001637	F48E3.1		1					1
WBGene00001623	Y53C12A.2			1				1
WBGene00001612	C06E1.4					1		1
WBGene00001562	B0513.1			1				1
WBGene00001515	T24C12.2	1						1
WBGene00001427	Y18D10A.19			1				1
WBGene00001412	T19C3.8			1				1
WBGene00001391	K01A2.2			1				1
WBGene00001389	F15B9.3			1				1
WBGene00001340	T01D1.2			1				1
WBGene00001335	F35A5.8			1				1
WBGene00001329	T04C10.2		1					1
WBGene00001245	F56H11.3		1					1
WBGene00001239	F56H11.4			1				1
WBGene00001230	F22B5.2			1				1
WBGene00001193	C23H3.1			1				1
WBGene00001186	F55A8.1			1				1
WBGene00001184	F58A3.2			1				1
WBGene00001174	C08C3.1			1				1
WBGene00001151	F38H4.8			1				1
WBGene00001130	C02C6.1		1					1
WBGene00001072	T14B4.7						1	1
WBGene00000897	F29C4.1		1					1
WBGene00000886	B0252.4			1				1
WBGene00000866	Y43E12A.1			1				1
WBGene00000781	C52E4.1			1				1
WBGene00000765	ZK652.9			1				1
WBGene00000751	C34F6.2			1				1
WBGene00000745	F38B6.5			1				1
WBGene00000722	B0024.1			1				1
WBGene00000693	C53B4.5			1				1
WBGene00000644	C50D2.4			1				1
WBGene00000558	R09B5.9			1				1
WBGene00000517	T05A6.2			1				1
WBGene00000507	F44B9.4			1				1
WBGene00000455	C10G8.6			1				1
WBGene00000382	C43E11.10			1				1
WBGene00000379	K01C8.10	1						1
WBGene00000298	F32G8.6			1				1
WBGene00000251	C09G5.6			1				1
WBGene00000232	B0207.12			1				1
WBGene00000172	F40F9.9			1				1
WBGene00000122	M18.7			1				1
WBGene00000116	C54D1.4			1				1
WBGene00000066	M03F4.2			1				1
WBGene00000065	T04C12.4			1				1
WBGene00000048	C40C9.2			1				1
WBGene00000039	C42D8.5			1				1
WBGene00000010	Y53H1C.1			1				1
