# Supplementary material for: An intestinal microRNA modulates the homeostatic adaptation to chronic oxidative stress in C. elegans
Source: Aging (Albany NY). 2016 Sep 12;8(9):1979–96. doi: 10.18632/aging.101029 (PMC5076448; doi:10.18632/aging.101029)
Supplement: Supplementary file 3 [file aging-08-1979-s003.xlsx]

## Sheet: S2_FPKM_Summary
RefSeq_Locus	WormBase_ID	Gene_Public_Name	speA	speB	s60A	s60B	speD7	s60D7	s60D10
NM_058260	WBGene00022277	homt-1	49.0076	46.4894	46.1016	50.712	78.1618	74.0591	71.3951
NM_001306279	WBGene00022278	rcor-1	3.63433e-12	2.55065e-13	2.68174e-15	6.66049e-24	2.5226e-11	1.13739e-16	8.24993e-14
NM_001306278	WBGene00022278	rcor-1	0.000196032	9.23885e-05	0.00015286	0.000214788	0.00011712	0.000172559	0.000160383
NM_058262	WBGene00022278	rcor-1	42.9077	48.3104	41.2676	45.756	59.0246	62.7728	43.1857
NM_058261	WBGene00022278	rcor-1	11.7841	9.6128	8.35371	9.10028	5.29891	5.54826	2.07179
NM_058294	WBGene00021662	snpc-3.3	9.4404	9.81777	8.79362	9.65589	6.64192	6.02214	7.32
NM_058305	WBGene00021667	snpc-3.2	7.0504	6.02492	6.25399	6.69761	12.9636	10.3314	12.8515
NR_101513	WBGene00220069	T13E5.1	0	0	35.4084	0	0	0	0
NM_058309	WBGene00016903	marc-4	3.6707	3.90863	5.57504	5.02082	8.24338	11.0325	9.67652
NM_058329	WBGene00021733	otub-2	23.0438	23.2775	22.6227	21.1616	23.2666	23.5827	13.6061
NM_001306333	WBGene00021733	otub-2	3.60176	2.31254	0.756373	2.47644	2.15641	0.550712	1.2594
NR_131342	WBGene00235387	W04C9.8	2.3898	1.77144	3.35933	2.32084	7.71804	5.56614	6.40239
NM_001306256	WBGene00235388	W04C9.9	0.0515996	0.0544746	0.0598081	0.056076	0.370446	0.189867	0.163794
NR_101514	WBGene00220190	Y65B4BM.2	0	0	0	0	0	0	0
NM_058347	WBGene00022043	psf-3	123.452	109.367	103.981	100.325	113.976	87.6686	93.92
NM_001306345	WBGene00022042	icd-2	0	0	0	0	0	0	0
NM_182046	WBGene00022042	icd-2	156.197	203.731	177.569	179.738	88.0742	62.0982	74.6984
NM_058348	WBGene00022042	icd-2	1179.57	1168.27	1092.07	1125.45	2584.81	2532.98	3736.63
NM_001306344	WBGene00022042	icd-2	1.147e-14	1.66341e-15	3.51798e-15	1.08979e-14	1.36174e-15	1.66437e-16	1.3537e-17
NR_101515	WBGene00220191	Y65B4BR.12	0	3.07782	0	0	0	2.68187	0
NM_001306283	WBGene00235390	F56A6.8	0	0	0	0	0	0	0
NM_001306280	WBGene00018923	eme-1	11.5836	12.4841	4.81089	10.6488	13.5144	13.7928	16.6744
NM_001306282	WBGene00018923	eme-1	5.55571	0.000925278	0.00619513	1.97902	0.00256998	1.44456	0.00820999
NM_001306281	WBGene00018923	eme-1	0.000113264	2.07986e-09	2.19544e-15	3.03813e-05	2.55167e-10	0.000206224	1.32359e-13
NM_058356	WBGene00018923	eme-1	39.9478	45.0399	40.6714	41.3103	38.954	36.8134	27.5122
NR_101516	WBGene00220188	Y65B4A.10	0	2.07051	0.757741	0	1.34097	0	2.76693
NR_101517	WBGene00220189	Y65B4A.11	511.395	617.016	508.069	238.183	149.854	336.024	463.81
NM_001306240	WBGene00021209	hgap-1	4.61127	0.0147483	1.211	0.00195141	1.40602	1.04946	0.3109
NM_001306241	WBGene00021209	hgap-1	0.0163027	0.0870268	0.000434717	0.0267945	0.0126641	0.774029	2.18271
NM_001306242	WBGene00021209	hgap-1	5.39289	8.15542	6.88181	7.84536	3.87508	6.17149	3.86099
NM_001306243	WBGene00021209	hgap-1	21.1685	24.8178	25.2088	27.269	16.3293	20.9941	16.86
NM_058371	WBGene00021209	hgap-1	2.34873e-09	1.17605e-07	0.000128221	6.7192e-10	2.32583e-07	0.000204984	9.73505e-06
NM_001306254	WBGene00236789	Y18H1A.18	4.16335	1.46511	0.804275	3.01635	31.313	27.4475	30.1027
NM_001306304	WBGene00022518	zfh-2	2.17533	2.0626	2.42049	2.35746	1.53646	1.30122	0.953789
NM_001306305	WBGene00022518	zfh-2	1.10671	1.34277	2.63242	2.24667	2.47036	1.61317	0.486554
NM_001306306	WBGene00022518	zfh-2	0.0127722	0.00242817	0.0184795	0.0484984	0.00575031	0.00129251	2.45668
NM_001306307	WBGene00022518	zfh-2	1.5815	3.6004	2.10529	1.10072	1.9331	5.51976	2.56637
NM_001306308	WBGene00022518	zfh-2	1.61933	0.280283	1.32735	1.80234	1.32732	0.0150585	0.476854
NM_001306309	WBGene00022518	zfh-2	0.321512	7.00927e-09	9.11894e-11	0.946243	1.1052	0.815281	0.935662
NR_101518	WBGene00220217	Y95B8A.18	0	0	0	0	0	4.82212	0
NM_058405	WBGene00016930	madf-6	34.2454	37.7423	32.9965	30.7358	24.8505	18.7428	14.3619
NM_058406	WBGene00016930	madf-6	1.52694e-05	1.30506e-05	0.254351	1.14483e-05	0.322736	0.148098	6.85941e-06
NM_001306269	WBGene00236808	C54G6.8	0	0	2.10924	0	1.86635	10.044	7.702
NM_058407	WBGene00021327	mrpl-38	52.5512	56.8577	54.9096	55.1782	59.352	55.4968	45.3116
NM_058414	WBGene00021328	npr-23	1.43197	0.983841	1.39631	1.30918	2.72747	3.78455	2.54935
NM_001306273	WBGene00236809	ZK993.5	0.0472838	0	0	0	0.113154	0.0724943	0.0500314
NR_131344	WBGene00249808	Y48G8AL.20	6.76369	3.72674	4.96615	3.51416	3.23353	4.06533	2.42359
NM_058433	WBGene00021685	herc-1	26.332	36.1842	27.9781	33.4386	20.4063	21.483	18.7573
NM_001306503	WBGene00021685	herc-1	0.0195881	0.244294	1.4767	0.00289613	2.87322	2.21347	0.16045
NM_001306504	WBGene00021685	herc-1	2.04952	2.54981	0.935181	2.19599	0.642578	1.9305	1.59814
NM_001306505	WBGene00021685	herc-1	5.73876	0.000388119	2.6655	0.015957	1.00826	0.000890746	2.29139e-10
NM_001306506	WBGene00021685	herc-1	18.3331	17.4551	13.0806	15.5099	9.41006	5.8093	8.81297
NM_058453	WBGene00022373	mrpl-15	58.0209	55.0286	54.203	53.789	37.6203	31.6532	26.3072
NR_101519	WBGene00219937	F37F2.4	0	0	0	0	0	0	0
NR_131346	WBGene00236797	Y71G12B.44	7.85416e-09	0.060152	0.103402	1.49697e-08	0.272794	0.411299	0.237929
NR_101520	WBGene00220197	Y71G12B.41	0	0	0.0272704	0	2.43054e-06	0.350491	2.2087e-05
NM_001026647	WBGene00006771	tln-1	6.86969	7.88522	12.2175	11.295	2.8766	3.36311	3.49729
NM_058485	WBGene00006771	tln-1	6.26866	5.92171	8.22303	7.75741	9.96009	14.3267	8.84458
NM_001262110	WBGene00006771	tln-1	0.785496	0.705188	2.0345	0.796019	0.00012286	8.46728e-05	6.33722e-05
NM_001306510	WBGene00006771	tln-1	6.72886	5.86549	7.53506	7.87631	7.40331	7.30686	7.18259
NR_101522	WBGene00220198	Y71G12B.42	0	0	0	0	0	0	0
NR_101523	WBGene00219766	anr-42	0.176893	0.0858257	0.418065	0.4466	0.44393	0.578181	0.294234
NM_058501	WBGene00022141	chaf-2	100.224	105.087	94.5733	96.4286	74.0859	73.0646	58.7862
NM_058500	WBGene00022141	chaf-2	2.40687e-05	2.14375e-05	2.13364e-05	0.183691	1.77234e-05	0.29876	1.79983e-05
NR_101524	WBGene00220027	M01D7.11	0	0	0	0	0	0	0
NM_058514	WBGene00022138	trpp-10	0.223042	1.74772e-05	3.70857e-05	0.160345	0.232159	0.16599	6.27593e-05
NM_001129082	WBGene00022138	trpp-10	9.59178	11.2363	9.71278	9.9259	5.11917	5.96876	4.48564
NM_001262149	WBGene00022138	trpp-10	11.2503	10.3126	9.28299	9.31328	5.29301	4.7994	3.53379
NR_101525	WBGene00219760	anr-19	0	0	0	0	0	0	0
NM_001306473	WBGene00255420	Y51F10.15	0	0.0964247	0	0.198519	0.281023	0.25206	0.0966431
NR_101526	WBGene00220136	Y20F4.11	0	0	0	0	0	0	0
NM_058516	WBGene00021237	crtc-1	14.5938	16.7057	18.5924	23.5468	22.4513	32.1993	23.5918
NR_101527	WBGene00219749	linc-30	0.72659	0.549512	0.54535	0.54346	1.20086	1.5569	1.04832
NM_001306421	WBGene00021353	iglr-3	1.92341	0.301904	0.65949	0.177974	0.863875	0.690051	1.77611
NM_001306420	WBGene00021353	iglr-3	3.20584	4.21648	3.85907	4.68732	5.76469	6.11097	3.90601
NM_001306350	WBGene00235158	Y37E3.30	11.3617	7.99647	8.77938	9.70146	14.8709	15.8268	12.6516
NR_131354	WBGene00017398	slc-17.6	0.720155	0.461056	0.364081	0.418032	0.154775	1.30683	0.463992
NM_171833	WBGene00017398	slc-17.6	3.46146e-05	6.43402e-05	0.324951	2.56578e-05	0.348245	0.481911	2.11685e-05
NM_058546	WBGene00017398	slc-17.6	15.3813	17.7255	10.6676	12.8537	6.54489	15.657	4.1834
NR_131353	WBGene00017398	slc-17.6	4.10181	1.32697	2.33476	2.44388	2.40858	4.24852	1.93698
NM_001306429	WBGene00017398	slc-17.6	2.92197	1.09818	4.93862	7.23039	3.05221	0.000517768	5.97567
NM_058558	WBGene00021475	tbca-1	213.269	208.568	205.86	221.62	277.513	279.244	237.491
NM_001306395	WBGene00219275	Y39G10AR.32	187.122	180.806	161.457	162.847	100.891	62.7306	67.631
NM_001262210	WBGene00219275	Y39G10AR.32	46.4272	42.3465	40.0291	35.8281	25.889	18.4108	12.2211
NM_001306394	WBGene00021474	dot-1.1	7.05898	4.40512	7.5676	4.5136	6.96503	10.0636	9.06588
NM_170825	WBGene00021474	dot-1.1	7.2278	4.97057	7.23898	7.02302	8.03523	11.159	6.40029
NM_170824	WBGene00021474	dot-1.1	32.7099	39.2883	33.5904	37.8184	26.3591	28.5208	22.0205
NM_058573	WBGene00017735	did-2	251.651	242.569	295.536	281.598	321.49	324.47	346.431
NM_001306388	WBGene00255457	F23C8.14	0	0	0	0	0	0	0
NM_001306387	WBGene00255457	F23C8.14	1.98607	2.09673	5.75502	7.01468	6.62	8.6782	14.185
NM_058591	WBGene00021275	dmsr-2	1.31174	1.23906	1.64044	1.98825	4.28381	4.50915	4.40131
NR_131357	WBGene00255578	mir-8193	0	0	0	0	0	0	0
NM_058609	WBGene00021271	spe-47	0.436233	0.322485	0.287668	0.540097	1.23194	1.49172	1.28824
NM_001306358	WBGene00021271	spe-47	3.56111	0.985432	1.16052	0.724705	17.2317	9.02424	16.588
NM_058617	WBGene00018230	mage-1	69.314	65.495	60.7393	61.0985	88.4001	77.2843	63.7805
NR_101528	WBGene00219692	linc-23	0	0	0	0	0	0	0
NR_101529	WBGene00219930	F32B5.17	0	0	0	0	0	0	0
NM_001306443	WBGene00022129	lron-11	3.91606	2.55482	3.28218	3.59695	3.25931	2.72967	1.52838
NR_131374	WBGene00022129	lron-11	1.50498e-08	1.45146e-08	6.68367e-09	7.97878e-05	0.000333181	1.03722e-10	2.35813e-05
NR_131373	WBGene00022129	lron-11	0.000142878	0.001218	0.000323051	0.000156987	0.0190478	0.000187221	0.000350078
NM_058634	WBGene00022129	lron-11	6.67778	4.97908	9.69234	6.99749	9.01666	6.64234	3.34668
NR_131375	WBGene00255549	Y71F9B.24	0.501371	1.28752e-21	0.45149	0.000241306	1.25471	0.593638	0.512539
NR_131376	WBGene00255549	Y71F9B.24	7.25263e-08	0.454725	3.31321e-11	0.297195	5.29219	4.0852	6.02834
NR_131476_2	WBGene00235379	T28H11.31	0	0	0	0	0	0	0
NM_001306456	WBGene00255550	W03D8.14	0	0	0	0	0	0.07165	0
NR_101530	WBGene00220118	W03D8.13	0	0	0	1268.75	1197.36	0	0
NR_101531	WBGene00220126	W10C8.17	1.05609	0	0	0	1.08313	0.971501	0
NR_050014	WBGene00219219	mir-5546	0	0	0	0	0	0	0
NR_101532	WBGene00220195	Y71F9AL.24	0	0	0	0	0	0	0
NM_058668	WBGene00022119	copa-1	69.0523	89.1882	76.5648	86.0489	44.3942	50.8696	36.3181
NR_050015	WBGene00219263	mir-4931	0	0	0	0	0	0	0
NM_058682	WBGene00022124	supr-1	18.0752	18.7827	16.5452	18.3443	11.0328	9.65054	6.86043
NR_101533	WBGene00219857	C45E1.10	1.13723	1.20059	1.31814	0	0	0	0
NR_101534	WBGene00219712	linc-167	0	0	0.00733299	0	0	0	0
NM_001262379	WBGene00219460	K09H9.9	0.779343	0.658213	0.722656	0.508172	6.07467	4.87506	5.77241
NR_101535	WBGene00220015	K09H9.11	460.717	447.673	400.313	396.346	335.068	386.402	258.207
NM_058713	WBGene00021829	mrpl-17	100.595	91.1134	87.9383	90.7778	113.247	87.4349	100.123
NM_058726	WBGene00021826	txl-1	153.431	153.222	140.008	142.77	86.6442	69.1823	59.0274
NR_101536	WBGene00220179	Y54E10A.29	0	0	0	0	0	0	0
NM_058741	WBGene00021548	trx-4	320.31	267.728	309.658	269.839	465.192	410.078	516.713
NM_001037893	WBGene00021034	enu-3.4	3.09189	3.92466	2.60718	3.32065	3.27818	3.49165	2.5388
NR_101537	WBGene00219710	anr-45	0.0768812	0.0202912	0.133667	0.0417754	0.1577	0.176808	0.0610115
NR_101538	WBGene00220004	K03E5.9	0	0	0	0	0	0	0
NM_058758	WBGene00019360	neto-1	0.507564	0.556454	0.520426	0.657673	1.70183	1.18523	0.991493
NR_101539	WBGene00220165	Y47G6A.36	552.278	503.543	465.552	572.908	489.181	554.228	504.683
NR_101540	WBGene00220166	Y47G6A.37	0	0	0	0	0	0	0
NR_101541	WBGene00220167	Y47G6A.38	0	0	0	0	0	0	0
NM_058777	WBGene00021634	rde-10	26.4591	27.3494	23.9176	26.123	13.4773	11.0418	9.34326
NR_101642	WBGene00220128	Y6B3B.15	0	0	0	16.5995	31.331	0	80.8098
NM_058795	WBGene00020903	acd-5	4.01683	3.30675	4.17455	3.67863	6.06381	13.3937	23.6677
NR_101542	WBGene00219678	linc-9	18.3485	16.656	14.9033	14.9175	11.2269	8.50338	9.928
NR_131380	WBGene00255568	mir-8204	0	0	0	0	0	0	0
NM_058809	WBGene00020466	sld-2	65.7755	54.0893	57.0473	52.4977	59.3526	44.318	43.4039
NM_058830	WBGene00016326	ubr-1	34.3754	40.4626	36.7034	40.1465	26.9011	33.2622	22.4126
NM_058841	WBGene00020189	tfbm-1	26.7174	23.5843	25.269	25.4803	42.9706	38.5148	42.7365
NM_001129039	WBGene00020190	guk-1	93.0249	86.3172	87.2736	87.6432	65.5881	71.5836	52.1863
NM_058842	WBGene00020190	guk-1	13.8423	14.2318	23.386	14.7293	31.0402	19.3899	15.5335
NR_101543	WBGene00219725	linc-63	1.20286	1.26988	1.26746	1.18837	0.672904	0.352072	0.694229
NM_058847	WBGene00020184	uba-5	61.0793	64.5353	61.6397	65.4907	47.397	50.1468	45.6544
NM_058859	WBGene00016841	magu-3	1.99056	1.62113	4.76275	3.04399	3.20812	2.13195	1.80534
NM_058861	WBGene00020625	mrrf-1	27.9401	20.7869	26.5989	24.1857	53.2225	41.9016	46.7297
NR_101544	WBGene00219953	F47B3.9	0	0	0	0	0	0	0
NR_101545	WBGene00219973	F55C7.9	0	0	0	0	0	0	0
NR_101546	WBGene00219830	C24G7.6	0	0	0	0	0	0	0
NM_058892	WBGene00016066	acd-2	4.39194	3.56029	5.53377	3.04169	1.40763	1.96597	1.40556
NM_058895	WBGene00016063	delm-2	0.0108064	0.0228171	1.29013	0.704635	0.0664988	0.0695861	0.0114344
NM_058903	WBGene00017088	akir-1	188.863	198.554	179.898	182.703	224.219	218.201	166.684
NR_101547	WBGene00219871	E01A2.11	14.105	0	0	0	14.4662	38.9258	14.9247
NM_058905	WBGene00017089	poml-2	3.44741	2.06789	4.40448	3.44846	1.94864	2.14422	2.52854
NM_001128968	WBGene00077701	poml-3	6.2514	4.97581	6.21728	4.28626	1.1933	1.97737	0.772059
NM_058917	WBGene00020037	mrps-6	85.8222	84.6442	83.6676	90.4413	133.363	151.361	126.381
NM_058928	WBGene00015971	swsn-2.2	119.798	118.972	111.358	112.514	129.743	109.723	90.6654
NR_101548	WBGene00219754	linc-85	0.519673	0.391877	0.258147	0.242038	0.98982	2.8	2.43514
NM_058959	WBGene00022831	cec-10	62.4962	63.601	59.2775	62.3164	39.8166	39.486	40.3126
NM_058966	WBGene00015704	tiam-1	1.78131	1.59585	2.08936	2.04382	1.19369	1.20776	0.863563
NR_101549	WBGene00219721	linc-104	0.665127	0.234062	0.256978	0.240943	0	0.611852	0.703776
NR_101550	WBGene00220054	T01A4.8	0	0	0	0	0	0	0
NM_058980	WBGene00022470	mrpl-19	42.2917	41.4911	36.7336	37.2559	45.62	33.3044	33.2511
NM_058984	WBGene00022474	zig-9	15.2213	13.4729	19.3531	17.3733	13.7612	22.9514	20.2117
NR_101551	WBGene00220231	Y119C1B.13	0	0	0	0	0	0	0
NM_059012	WBGene00016652	got-2.1	96.1854	94.9732	91.2329	89.9772	62.3955	48.7134	42.5067
NM_059014	WBGene00015008	lmd-2	29.6486	24.8584	28.2916	27.4633	31.2241	24.7112	23.7918
NM_001262757	WBGene00206362	B0041.11	126.007	141.896	126.579	164.326	577.243	718.669	275.547
NR_101552	WBGene00219727	linc-39	0.118305	0.249794	0.822751	0.514274	0.485338	1.74127	1.50216
NM_059025	WBGene00007053	chd-7	18.3503	17.4946	21.3392	20.6274	15.7332	21.066	11.2518
NR_101553	WBGene00219746	linc-91	0.166105	0.0846564	0.132778	0.118268	0.728427	1.02218	1.14545
NM_059056	WBGene00019013	tofu-4	14.269	12.9453	11.6501	10.9971	13.0471	11.6398	6.80225
NM_059060	WBGene00019010	glo-2	5.21303	12.7415	2.94511	9.52229	7.02371	1.7032	0.000123659
NM_001306531	WBGene00019010	glo-2	17.5849	16.6648	20.7145	17.4316	12.5888	14.2403	11.6721
NM_001306368	WBGene00017885	dip-2	0.209479	0.0735278	0.0635305	0.25632	0.0965176	0.247179	0.100954
NM_001306374	WBGene00017885	dip-2	0.138363	0.0998496	0.127207	0.435102	0.255541	0.801051	0.409732
NM_001306369	WBGene00017885	dip-2	9.26937	8.55411	6.25152	7.34066	3.95685	4.068	2.34999
NM_001306373	WBGene00017885	dip-2	6.05363	11.7148	12.6615	12.5919	10.6446	13.4478	9.76434
NM_001306375	WBGene00017885	dip-2	0.999458	0.656438	0.89261	0.803155	1.05103	0.964701	0.654024
NM_001306376	WBGene00017885	dip-2	0.649	0.908606	1.85623	1.40227	2.90315	3.29746	2.8159
NM_001306370	WBGene00017885	dip-2	0.423348	0.297396	0.474643	0.323482	0.227552	0.146811	0.121477
NM_001306372	WBGene00017885	dip-2	0.266839	0.423897	1.05543	0.593561	0.693622	0.567391	0.600441
NM_001306371	WBGene00017885	dip-2	0.0337002	2.10184	1.0755	1.56641	0.82629	0.0708972	0.392263
NM_059082	WBGene00017885	dip-2	7.05849	2.938	2.58666	3.05678	2.48666	1.69329	2.01456
NM_059086	WBGene00021015	enu-3.3	10.4022	12.1076	9.35754	10.9795	9.41504	9.76461	7.82395
NR_101554	WBGene00219663	anr-10	2.40294e-05	6.81592e-06	1.19539e-06	0.00232303	2.25302e-06	7.0206e-07	1.5011e-07
NR_101555	WBGene00219654	linc-156	0.00878267	0.00927202	0.0101798	0	0.0495416	0.0807921	0.0604047
NM_170856	WBGene00022465	ift-20	0.495392	0.313797	1.37808	0.753716	3.65815	3.37228	3.24991
NM_059126	WBGene00022458	prp-31	141.541	138.465	128.914	134.367	112.323	102.362	94.9861
NM_059129	WBGene00022456	pfkb-1.1	44.6831	48.5362	40.9093	43.2766	59.4385	55.5407	80.8484
NM_059128	WBGene00022456	pfkb-1.1	133.048	120.953	124.636	123.418	209.603	162.212	210.253
NM_059131	WBGene00022455	tyms-1	106.768	106.37	103.378	110.229	120.403	121.775	98.8762
NM_001047167	WBGene00015092	mrpl-47	66.8447	62.7186	52.8236	61.7721	83.6785	80.7877	73.3625
NM_001047168	WBGene00015092	mrpl-47	1.54542	0.00515169	7.15474	0.148307	7.79771	2.13017	0.0693291
NM_059160	WBGene00015313	hpo-32	29.8978	32.7518	30.2976	30.9454	57.1018	58.0729	46.8011
NR_131383	WBGene00236798	F48C1.15	0.1681	0.172684	0.296869	0.250943	0.355233	0.425483	0.317619
NM_059173	WBGene00018866	nath-10	13.565	14.0433	13.8536	14.7807	28.909	32.8693	23.3911
NR_101556	WBGene00219703	anr-38	0.123273	0	0	0.133967	0	0	0
NM_059178	WBGene00018862	wago-2	28.9908	29.158	22.5384	28.2323	4.43097	3.47995	0.875373
NR_101557	WBGene00219918	F27C1.18	170.284	89.8861	246.716	138.793	305.628	313.29	450.448
NM_001262981	WBGene00206357	C09D4.9	1.04621	2.76126	1.81896	5.68487	32.19	30.316	36.5312
NM_059212	WBGene00019076	mrpl-24	40.467	39.2059	37.2381	38.8377	24.7412	20.2862	19.3956
NM_059218	WBGene00019074	cpd-1	8.18227	8.75516	8.99864	8.42374	7.70983	10.6985	7.15289
NM_059242	WBGene00018512	trpp-8	20.6904	25.1607	22.6033	24.5402	11.0286	12.7506	7.2314
NM_059241	WBGene00018512	trpp-8	1.71178	1.03628	0.637059	0.553959	0.231353	7.02868e-05	0.000107893
NM_059265	WBGene00020556	pamn-1	9.45052	13.5477	13.4197	26.9438	16.7709	31.663	17.5824
NM_001263054	WBGene00206363	F56H1.10	0	0	0	0	0	0	0
NM_001306475	WBGene00045483	oxy-5	296.604	242.816	253.576	239.89	452.85	341.7	399.547
NM_059274	WBGene00020694	dhhc-11	0.165586	0.0249732	0.246764	0.102829	0.0970437	0.217605	0.125149
NM_170869	WBGene00020693	lron-8	1.31586e-05	4.34859e-05	8.06446e-05	1.44255e-05	8.59816e-05	5.4876e-05	4.1582e-05
NM_059275	WBGene00020693	lron-8	5.62504	4.01183	6.34561	4.52643	1.95965	2.7452	2.04451
NR_101558	WBGene00219845	C32F10.9	0	0	0	0	0	0	0
NM_059291	WBGene00018002	twk-47	0.190167	0.217493	0.275524	0.258331	0.471339	0.918411	0.519812
NM_059300	WBGene00018006	hpo-3	202.797	185.594	178.45	182.313	141.325	113.776	101.424
NM_059299	WBGene00018006	hpo-3	41.8095	44.7702	41.4809	43.9366	51.8916	49.0455	34.7332
NM_059301	WBGene00018009	dhhc-3	104.031	92.5205	91.3144	88.8799	92.7415	73.2328	58.7183
NM_059304	WBGene00016421	cdc-7	52.7915	46.3691	42.9414	44.4697	41.4778	28.7613	24.4192
NM_001276520	WBGene00016418	hpo-27	22.8445	27.0618	25.2847	28.0266	16.8118	23.5998	14.0628
NR_101559	WBGene00220212	Y76G2B.1	0	0	0	0	0	0	0
NR_101560	WBGene00219778	B0025.7	0	0	0	0	0	0	0
NR_101561	WBGene00219779	B0025.8	0	0	0	0	0	0	0
NR_050159	WBGene00219261	mir-4926	0	0	0	0	0	0	0
NR_101562	WBGene00220243	ZK484.11	0	0	0	0	0	0	0
NR_101563	WBGene00220100	T27A3.12	0	0	0	0	0	0	0
NM_059364	WBGene00020839	usp-5	72.2428	89.3691	75.4172	81.1634	69.5572	73.8859	67.1594
NR_101564	WBGene00219705	anr-5	3.02669	0	3.50818	0	0	0	3.20257
NR_101565	WBGene00220064	T09B4.21	0	0	0	0	0	0	0
NR_131385	WBGene00235197	rrn-4.16	0	0	0	0	0	0	0
NR_101566	WBGene00220065	T09B4.22	13.1312	0	0	0	0	0	0
NR_050174	WBGene00219253	mir-4916	0	0	0	0	0	0	0
NM_059382	WBGene00020375	pigv-1	151.471	149.137	128.956	142.063	111.074	82.6681	56.8219
NM_059390	WBGene00020348	mrpl-23	113.78	93.6724	100.715	87.8026	155.838	135.735	163.83
NM_001263202	WBGene00206356	T08B2.15	0.324605	0	0	0	0.0832293	0	0.085867
NM_182035	WBGene00016754	cebp-2	12.2367	8.74486	11.1285	10.4341	10.6193	8.31258	6.97189
NR_101567	WBGene00220006	K04F10.9	0	0	0	0	0	0	0
NR_101568	WBGene00220039	R10A10.3	0.896357	0	0	0	0	0	0.948443
NM_059450	WBGene00018157	lron-6	0.0332861	0.0351408	0.0514417	0.0602897	0.0455179	0.0816534	0.0821808
NM_059451	WBGene00018158	comp-1	0.0166656	0	0.0579502	0.0181114	0.102554	0.0306614	0
NM_059455	WBGene00020743	mam-8	0.424806	0.23197	0.492384	0.286547	3.72585	4.74327	4.35542
NM_059463	WBGene00019434	nmtn-1	0.425317	1.05422e-05	0.394988	0.423459	0.350196	0.625921	0.274803
NM_059464	WBGene00019434	nmtn-1	0.106198	0.484036	0.122096	0.000102628	0.280165	0.0931613	0.397437
NM_059466	WBGene00019434	nmtn-1	0.148622	0.107673	0.32114	0.123101	0.475411	0.600569	0.089059
NM_059495	WBGene00019001	ipgm-1	11.8836	13.5553	13.8176	21.5161	10.815	9.68153	11.9114
NM_182051	WBGene00019001	ipgm-1	89.019	96.7947	94.2207	92.14	76.1114	77.2589	53.327
NR_101569	WBGene00219955	F48A9.6	17.7391	18.7275	0	0	36.3866	0	18.7699
NR_101570	WBGene00219870	D2092.15	0	0	0	0	0	0	0
NM_059501	WBGene00017066	maco-1	64.6767	71.7083	58.6119	63.9443	51.2931	48.4763	32.6688
NM_059530	WBGene00020931	cytb-5.2	356.77	299.668	337.402	309.819	1339.12	1108.52	1737.2
NM_059535	WBGene00017240	calu-2	20.1833	17.9509	21.6762	18.7422	14.5094	13.4354	13.4295
NR_101571	WBGene00219882	F08B6.7	0	0	0	0	0	0	0
NM_059551	WBGene00006740	tofu-3	8.74115	9.22819	7.86465	8.37108	8.17249	7.1525	4.599
NR_101572	WBGene00220000	K02F2.11	0	14.8909	0	0	0	0	0
NM_059561	WBGene00019245	sacy-1	45.4921	46.054	40.9726	44.4857	35.0087	33.8263	21.2337
NR_101574	WBGene00219733	linc-53	2.06177	2.17665	5.97438	3.36095	0	0	1.09079
NM_059564	WBGene00020661	smz-2	0.599242	0.542254	1.52144	0.961336	0.965777	1.10249	1.26813
NM_059588	WBGene00016266	idhg-2	15.1673	14.5936	21.0739	18.3609	3.15052	2.49025	3.04722
NM_059593	WBGene00010369	chd-1	17.7132	16.5391	16.9284	16.7347	13.1238	11.4369	6.99751
NM_170895	WBGene00008852	ubql-1	24.912	40.5515	31.8544	31.5457	63.85	61.7887	73.0747
NM_170894	WBGene00008852	ubql-1	54.2155	52.3106	45.3547	49.7724	63.5794	69.4951	71.5666
NM_171839	WBGene00008852	ubql-1	4.05039	5.8521	3.69614	5.29504	6.50956	7.14595	5.56118
NM_059601	WBGene00012167	tofu-5	98.0844	97.4568	83.3485	88.1719	129.695	111.086	96.9621
NR_101575	WBGene00220018	K10D3.9	0	0	0	0	0	0	0
NM_001263473	WBGene00219281	K10D3.8	6.09978	1.60991	7.07012	33.1447	3.12798	2.8056	3.22711
NR_101576	WBGene00220019	K10D3.10	117.785	104.766	108.394	111.205	105.741	141.056	90.4465
NM_059621	WBGene00010427	hpo-11	63.0637	72.3934	68.5241	72.5974	73.7097	94.792	67.4472
NM_059622	WBGene00010645	fecl-1	73.3287	61.98	65.5419	66.5887	37.3677	30.5767	26.0792
NR_101577	WBGene00220010	K07G5.7	0	0	0	0	0	0	0
NM_059625	WBGene00010642	mks-6	0.251558	0.276414	0.380834	0.351491	0.489673	0.462819	0.282473
NM_001128942	WBGene00007256	swsn-9	2.57452e-05	4.73623e-05	5.13092e-05	3.82117e-05	5.66279e-05	4.67095e-05	3.70021e-05
NM_059640	WBGene00007256	swsn-9	114.999	116.599	110.411	108.753	100.959	86.7866	71.2852
NM_059644	WBGene00011061	wago-1	213.78	251.161	205.074	226.226	146.568	120.577	113.825
NM_059648	WBGene00011064	adsl-1	63.0733	66.5779	70.5458	72.1465	64.4524	64.567	52.2048
NM_182050	WBGene00011064	adsl-1	0.286669	0.356802	0.647633	0.799606	0.992931	0.883997	0.37885
NM_059652	WBGene00002348	myo-1	11.4534	10.5316	15.1971	13.0588	7.9183	11.0224	9.26198
NM_059666	WBGene00008769	mrpl-13	73.4667	65.5296	69.1436	62.2021	73.1786	65.7557	76.1372
NR_101578	WBGene00219591	linc-149	0	0	0	0	0.0139127	0	0
NR_101579	WBGene00219578	linc-141	0	0	0	0	0	0	0
NR_101580	WBGene00219817	C15A11.10	0	0	0	0	0	0	0
NR_101581	WBGene00219833	C26C6.12	0	0	0	0	0	0	0
NR_101582	WBGene00219834	C26C6.13	0	0	0	1.52419	0	5.16072	0
NR_101583	WBGene00219835	C26C6.14	0	0	0	0	0	0	0
NM_059715	WBGene00008411	mans-1	96.3353	93.4877	86.1362	81.689	113.52	94.389	65.2676
NM_001129050	WBGene00011971	lron-9	74.0917	68.1397	98.7183	93.2719	193.387	210.095	259.243
NM_001083146	WBGene00011971	lron-9	0.423863	1.05077	2.54224	0.892464	1.44691	0.932993	1.59122
NM_001026467	WBGene00011971	lron-9	3.4063	3.09389	2.56657	3.90908	0.0256482	1.04438	0.00274596
NR_101584	WBGene00220089	T23G11.12	1196.93	1031.25	1040.91	1136.15	647.095	432.235	370.958
NR_101585	WBGene00219919	F27D4.10	0	0	0	0	0	0	0
NR_101586	WBGene00219920	F27D4.11	0	0	0	0	0	0	0
NM_059763	WBGene00009272	gras-1	112.936	106.336	94.3389	95.8653	122.722	93.5442	73.516
NR_101587	WBGene00220041	R11A5.8	0	0	0	0	0	0	0
NM_001026416	WBGene00011232	pck-2	313.818	388.763	378.593	405.57	490.807	579.447	682.014
NM_001026417	WBGene00011232	pck-2	163.82	201.886	187.81	192.209	223.575	253.369	301.163
NM_001026419	WBGene00011232	pck-2	0.00104938	0.00146536	0.00148563	0.00150977	0.00103874	0.00121032	0.00105514
NM_001026418	WBGene00011232	pck-2	273.907	222.728	233.383	192.598	206.812	239.894	248.797
NM_059776	WBGene00011235	suro-1	1.22337	0.950566	1.23648	0.850878	1.80676	1.16139	1.05628
NR_101588	WBGene00219608	linc-58	0.401908	0	0.931686	0	0.412199	0	0.425262
NR_050281	WBGene00195833	mir-8209	0	0	0	0	0	0	0
NR_101589	WBGene00220081	T22C1.17	0	0	0	0	0	0	0
NR_101590	WBGene00219863	C54G4.16	0	0	0	0	0	0	0
NM_059813	WBGene00010569	scbp-2	11.1846	8.68878	11.6593	9.24998	6.63733	5.17675	7.51755
NM_059814	WBGene00010565	vacl-14	35.8483	41.0716	34.0032	41.054	40.4066	40.2786	24.8112
NR_101591	WBGene00220106	T28B8.11	0	0	0	0	0	124.868	71.8141
NM_059852	WBGene00011345	dma-1	1.16714	0.667907	2.33897	1.45806	2.15913	2.55872	1.66201
NM_059869	WBGene00008887	tbcd-1	41.4204	42.8095	36.5607	40.4264	28.2676	25.2531	11.5363
NM_001129047	WBGene00011828	nepr-1	2.6669	3.43723e-05	3.83905e-05	0.828138	1.91793	1.50558e-05	1.93924e-05
NM_059876	WBGene00011828	nepr-1	93.8442	83.1971	85.7305	83.2487	96.8311	90.1568	99.3737
NM_001047182	WBGene00008532	dpt-1	0.0255468	0.000791951	0.00131394	0.000642324	0.000861786	0.00102002	0.000822137
NM_001047183	WBGene00008532	dpt-1	62.6208	68.6591	62.6641	65.1793	52.2157	47.9985	32.955
NR_101592	WBGene00219598	linc-113	0	0.0279675	0.0307057	0	0	0.0365543	0.0140154
NM_059924	WBGene00011034	paxt-1	48.1946	45.3167	42.9839	43.9764	59.6747	52.4337	45.8607
NM_059926	WBGene00011035	snrp-27	274.378	234.851	238.34	223.393	255.553	218.032	215.398
NM_059929	WBGene00009664	idha-1	86.1956	96.0525	96.1379	98.942	71.6628	78.1581	78.5507
NM_001129004	WBGene00009665	lmd-1	0.214209	3.63062e-06	0.498343	0.218068	0.776456	0.241476	4.86363e-06
NM_001129003	WBGene00009665	lmd-1	47.5932	41.5551	41.2849	42.573	59.3584	47.6915	43.4678
NM_001263903	WBGene00219282	F43G9.21	0	0	0	0	0	21.8913	0
NM_059947	WBGene00010621	egg-6	129.868	155.361	112.648	132.479	52.9859	42.7304	28.4438
NM_059950	WBGene00010624	mrps-15	46.2583	44.961	41.7627	42.7562	32.5007	25.9395	22.6616
NM_001263990	WBGene00219283	F55H12.7	0	0	0	0	0	0	0
NM_001263989	WBGene00219283	F55H12.7	7.01258	2.96132	11.3794	0	15.8227	27.0938	23.7442
NR_101593	WBGene00219592	linc-84	0.0748379	0.0790077	0.130115	0	0.115131	0.344218	0
NR_101594	WBGene00219976	F55H12.9	4.26223	6.74957	12.3507	16.212	8.74274	11.7625	11.2748
NM_182084	WBGene00009958	madd-4	0.950707	0.656985	1.30265	0.997023	0.607077	0.559901	0.451766
NM_001264004	WBGene00009958	madd-4	0.383233	0.493974	0.623563	0.433856	0.159863	0.488359	0.189093
NM_060004	WBGene00009958	madd-4	5.11552e-05	0.000280647	5.33236e-05	3.62223e-06	0.0161085	4.01655e-05	1.2055e-05
NM_001264012	WBGene00219450	F53B6.13	18.9664	22.8837	23.5539	20.6118	25.0098	19.9398	44.4375
NM_060011	WBGene00001568	snpc-4	41.7692	44.572	39.3976	40.0822	40.15	39.0599	28.401
NM_060010	WBGene00001568	snpc-4	1.56191e-05	1.92094e-05	0.27217	0.374868	1.95514e-05	0.115544	0.120759
NR_101595	WBGene00219588	linc-80	0	0	0	0	1.51327	0	0
NM_001037887	WBGene00009477	rbpl-1	7.11418	2.67996	5.21342	2.04147	11.7215	8.29515	14.7838
NM_001037886	WBGene00009477	rbpl-1	54.473	57.8877	56.7097	60.0684	42.6128	49.2946	35.0178
NM_060033	WBGene00012296	spe-46	0.529122	0.223441	1.0426	0.575025	0.949674	0.681438	0.559869
NM_060035	WBGene00012298	prmt-7	28.6345	27.5389	26.8659	26.9688	34.9737	41.4625	38.3635
NM_060039	WBGene00011532	chaf-1	86.4044	81.7621	74.1275	75.5281	90.0605	75.9784	50.2786
NR_101596	WBGene00220127	W10D5.5	0	0	0	0	0	0	0
NR_101597	WBGene00220246	ZK858.10	889.517	935.117	804.805	925.897	361.838	322.82	212.466
NM_060054	WBGene00009128	mrpl-54	104.201	97.5662	104.107	95.5941	95.5446	67.858	81.6856
NM_060067	WBGene00001590	C45G3.3	24.7433	23.4845	20.6394	20.8534	18.1263	15.9893	14.7638
NM_001264105	WBGene00009686	ent-7	41.7432	27.1071	34.6942	28.6028	27.5159	25.2732	23.5064
NM_001264104	WBGene00009686	ent-7	68.6231	68.5593	61.9717	66.3827	68.3903	59.018	48.79
NM_060075	WBGene00008781	rpoa-2	20.4095	19.2191	18.7746	18.344	23.2442	18.5523	9.4364
NM_060079	WBGene00009176	nmat-2	22.8818	21.9863	21.3146	22.4671	29.1297	21.5744	23.728
NM_060083	WBGene00009178	uggt-2	0.292556	0.224623	0.359646	0.231226	0.586455	0.738049	0.445573
NM_001128947	WBGene00007533	cbl-1	5.4393	2.13974	3.17448	7.24067	0.498427	1.21315	0.526151
NM_060085	WBGene00007533	cbl-1	18.1323	18.1543	14.5983	16.3479	2.01172	1.57181	1.83002
NR_101598	WBGene00219811	C12C8.8	0	0	0	0	0	0	0
NR_101602	WBGene00219581	anr-20	0.321691	0.383936	0.579649	0.285116	0.755039	0.854003	1.03816
NR_101599	WBGene00219582	anr-25	0.535137	0.0973497	0.908399	0.241842	2.07378	2.09518	2.22098
NR_101600	WBGene00219894	F16A11.12	0	0	0	0	0	0	0
NR_101601	WBGene00219895	F16A11.13	0	0	0	0	31.331	28.1019	0
NM_001264149	WBGene00219310	C17E4.19	1.13633	0.31295	1.83248	0.214766	0.202682	0.181793	0.57504
NM_001264151	WBGene00219313	C17E4.20	36.631	27.6046	39.3067	30.7472	57.3217	52.206	33.2773
NM_060101	WBGene00007643	marc-3	127.083	119.775	103.267	113.946	67.9281	41.6753	27.1732
NR_101603	WBGene00219951	F46A9.12	113.691	0	43.9256	0	38.8674	0	0
NM_060113	WBGene00009260	calm-1	16.6827	13.4792	17.1708	13.537	20.6231	15.8785	16.9931
NR_101604	WBGene00219926	F30A10.16	0	0	0	0	0	0	0.906923
NR_050390	WBGene00219227	mir-4932	0	0	0	0	0	0	0
NM_001264196	WBGene00219284	C41G7.15	0	0	0	0	0	0	0
NM_060133	WBGene00007985	swah-1	54.8301	51.2019	44.4394	48.1577	37.6988	25.8532	19.6088
NM_001264218	WBGene00219285	K07A1.20	0.216413	0.228471	0.12542	1.05834	0.221954	0.995393	0.57247
NM_001306366	WBGene00219796	C03D6.9	115.688	78.1031	148.48	98.7452	286.697	206.45	190.184
NR_101606	WBGene00219798	C04F12.17	0	0	0	0.798207	0.753296	0	0
NM_001264258	WBGene00219286	C04F12.16	11.6526	10.4093	18.7011	9.74118	6.43516	4.12281	7.58754
NR_101607	WBGene00219998	K02A11.12	0	0	0	0	0	0	0
NM_060197	WBGene00009165	gpx-1	67.7029	53.0599	71.0548	66.8938	132.792	94.4976	145.996
NM_060208	WBGene00010730	ensa-1	374.802	398.941	360.45	378.915	474.933	488.04	543.689
NR_101608	WBGene00220016	K10C3.13	0	0	0	0	0	0	0
NM_001264321	WBGene00009940	strl-1	73.5381	58.65	74.195	62.781	104.497	98.1442	90.0134
NM_001264322	WBGene00009940	strl-1	80.4318	78.6857	80.1312	77.8198	133.091	121.54	128.803
NM_001264326	WBGene00013695	epg-8	30.5546	22.6573	26.2164	26.0448	27.3115	20.9704	19.2959
NM_001264325	WBGene00013695	epg-8	2.40617e-05	2.15967e-05	2.82832e-05	2.15144e-05	2.82794e-05	1.77112e-05	2.56885e-05
NR_002352	WBGene00013695	epg-8	42.753	35.0647	37.3991	35.2019	37.5053	30.9757	25.4822
NM_170914	WBGene00013695	epg-8	9.35473	11.3872	12.0352	10.383	10.4813	11.8948	8.30354
NM_001129062	WBGene00013697	dsbn-1	0.848893	0.00268432	0.00277798	4.49718	6.63228	19.0214	19.1403
NM_060227	WBGene00013697	dsbn-1	146.628	132.953	127.543	127.802	262.045	267.69	259.528
NM_060231	WBGene00011988	har-2	94.0228	91.9108	75.2327	85.5069	64.0794	50.4187	30.0225
NM_060242	WBGene00011945	hpo-24	49.9402	50.2573	43.0031	44.276	46.2681	38.2435	22.4715
NR_101609	WBGene00220085	T23D8.11	0	0	0	0	0	0	0
NR_101610	WBGene00220086	T23D8.12	0	0	0	0	0	0	0
NR_101611	WBGene00220087	T23D8.13	13.5522	24.5268	33.6602	12.6239	9.92802	30.2763	12.2912
NM_060249	WBGene00003803	rae-1	119.419	127.633	110.755	119.743	188.815	162.696	129.507
NM_060252	WBGene00008664	nubp-1	77.3991	71.8769	74.8615	76.5664	138.254	133.72	143.598
NR_101612	WBGene00219787	B0379.12	0	0	0	0	0	0	0
NR_101613	WBGene00219788	B0379.13	0	0	0	0	0	0	0
NR_131390	WBGene00236800	linc-171	0	0.0199394	0.0218916	0.0410511	0	0.0173742	0.0199845
NM_060278	WBGene00007708	nola-3	1805.26	1480.07	1767.44	1552.8	3241.08	2816.06	3527.7
NM_060284	WBGene00007711	lid-1	75.63	70.1123	66.6992	66.9411	56.3541	48.6729	43.1752
NM_060285	WBGene00007712	mrpl-34	108.657	106.902	98.1761	99.876	120.081	80.0355	77.8052
NM_001276541	WBGene00219498	Y106G6E.8	0	0	0	0	0	0	0
NM_001276545	WBGene00220261	ZC434.10	0.0350838	0.0370386	0.16266	0.0762549	0.0359822	0.0322737	0.074245
NM_001264435	WBGene00009744	hpo-35	25.4362	28.6357	25.3471	26.8768	21.5626	20.1968	11.7767
NM_001129007	WBGene00077521	maf-1	6.26	5.00471	8.52384	7.33146	3.30364	5.92632	2.44372
NM_060328	WBGene00013717	madf-10	2.30833	1.98705	3.00483	2.27702	4.00643	4.6389	5.52373
NM_060338	WBGene00013725	ska-1	83.8828	72.2099	75.9634	73.1986	64.0743	47.376	51.9294
NM_001264472	WBGene00206464	F59C6.18	3.34492	6.42052	5.99176	12.7228	1.09154	0.699318	0.321753
NR_101615	WBGene00219987	F59C6.19	0	0	0	0	0	0	0
NM_060352	WBGene00010323	dhhc-12	0.145486	0.102395	0.196734	0.131756	1.01961	0.73608	0.564446
NM_060357	WBGene00009116	snx-27	21.1277	19.1634	21.7692	21.8909	23.9576	24.5628	20.115
NM_060360	WBGene00009119	ndk-1	4507.76	4557.15	4001.11	4219.06	2252.15	2133.73	2386.49
NM_001264504	WBGene00206474	T22A3.12	0.512959	0.54154	0.29728	0.27873	1.57828	1.03812	1.13981
NM_060376	WBGene00016622	mafr-1	65.5189	62.495	61.247	61.186	61.7363	61.4955	54.5385
NM_060382	WBGene00044321	mrps-30	39.6889	43.7567	39.8282	41.751	40.1522	40.4301	30.9123
NM_001264521	WBGene00219234	B0511.17	0.389814	1.2346	0	0	4.79755	3.9445	2.47479
NR_101616	WBGene00219789	B0511.18	0	0	0	0	0	0	0
NM_060409	WBGene00015025	mrpl-9	77.5109	68.2858	68.1261	67.0688	175.858	164.206	200.597
NR_101617	WBGene00219972	F55A3.8	35.4781	0	20.561	38.556	90.9665	48.9547	0
NM_060417	WBGene00018850	gpx-8	1.09044	1.1512	0.99307	0.846457	2.39649	2.93765	2.14278
NR_101618	WBGene00220142	Y37F4.15	0	0	0	0	0	0	0
NM_001306349	WBGene00235254	F49D11.14	0.242378	0.255883	0.280935	0.52681	0.497169	2.00668	0
NR_101619	WBGene00219422	Y52B11A.20	2.43561	1.33627	1.57825	1.50061	2.04558	2.34637	1.44076
NM_001276558	WBGene00219422	Y52B11A.20	0	0	0	0	0	0	0
NR_101620	WBGene00219621	anr-46	0.0502766	8.90463e-08	5.47281e-07	6.92104e-07	4.76707e-07	2.7029e-07	2.74306e-07
NM_060459	WBGene00013128	dox-1	78.1554	73.486	67.7016	71.2176	56.101	46.5864	42.2714
NM_001264627	WBGene00206497	Y52B11A.18	0.325536	0.245482	0.485129	0.454857	0.381568	0.213901	0.147623
NM_001264628	WBGene00206530	Y52B11A.19	0.75303	1.39123	1.30923	1.22754	0.579234	0.519536	0.398394
NR_101621	WBGene00220112	W02B9.3	0	0	0	0	0	0	0
NR_131391	WBGene00255576	mir-8190	0	0	0	0	0	0	0
NR_101622	WBGene00219923	F28D9.6	0	0	0	0	0	0	0
NM_001264652	WBGene00206528	Y53H1A.7	1.7313	1.14234	2.27094	2.58705	8.78768	8.90347	7.32762
NR_101623	WBGene00219622	anr-40	5.28703e-06	1.75753e-05	0.509877	5.14591e-06	0.594944	0.217249	3.79602e-07
NR_101624	WBGene00219950	F46A8.13	43.2624	52.8844	65.9796	51.9645	1132.61	737.295	1558.8
NM_001264679	WBGene00219287	F36D1.23	2.33695	1.7943	2.70871	1.84705	0.87156	1.1726	0.899181
NM_060495	WBGene00009461	madf-2	16.0059	15.5571	13.3392	12.593	13.2683	8.98037	9.20984
NM_001264688	WBGene00219319	H25P06.5	0.333925	0.528795	1.2579	1.72374	0.171238	0.844741	0.706657
NR_101625	WBGene00219929	F32B4.12	0	0	39.8261	0	11.7467	0	0
NM_060552	WBGene00008857	timm-23	154.659	135.932	152.851	150.268	1055.5	921.991	1617.58
NR_101626	WBGene00219820	C17D12.17	0	0	0	0	0	0	0
NR_101627	WBGene00219821	C17D12.18	11.6615	3.07782	16.8958	6.33659	11.9601	2.68187	9.25437
NM_060559	WBGene00007637	dhhc-7	74.9043	74.761	68.575	67.172	38.5654	37.198	24.4451
NM_060560	WBGene00007637	dhhc-7	0.000307538	0.000406508	0.000325459	0.00022016	0.000299665	0.000709596	0.00126787
NM_001264767	WBGene00206393	W04G5.16	0	1.92115	0	1.97762	0	3.348	1.9255
NM_001264773	WBGene00206532	F11A6.15	0	0	0	0	0	0	0
NR_050618	WBGene00219231	mir-5545	0	0	0	0	0	0	0
NM_060633	WBGene00013134	hsf-2	0.883908	0.622105	1.16112	0.832511	2.1757	0.433659	0.810568
NR_101629	WBGene00219983	F58D5.11	0	0	0	0	0	0	0
NR_101630	WBGene00219984	F58D5.12	0	0	0	0	0	0	0
NR_101631	WBGene00219985	F58D5.13	0	0	0	0	0	0	0
NR_101632	WBGene00219580	linc-18	2.89075	3.05182	0.837653	3.92692	2.96477	4.65362	0.764683
NR_101633	WBGene00219943	F41D3.16	0	0	0	0	0	0	0
NM_060766	WBGene00012104	sygl-1	248.853	265.523	229.938	275.098	119.527	118.875	95.5236
NM_060777	WBGene00012209	hmg-20	33.8528	32.9599	28.0363	30.8881	20.5788	20.4391	15.9524
NM_060784	WBGene00012211	ssp-37	41.9053	39.4219	37.9916	34.1179	15.4608	19.5925	8.9266
NM_060792	WBGene00011582	ntr-1	0.244736	0.158998	0.632798	0.429639	1.31294	1.59325	1.37446
NM_060800	WBGene00010420	mcrs-1	53.5206	54.3208	47.0174	48.2193	34.5719	28.8978	23.0142
NR_101634	WBGene00219557	anr-14	0.452494	0.122556	1.03875	0.132804	0.118996	0.103944	0.641843
NM_182000	WBGene00012474	attf-6	17.8879	19.822	17.9709	18.1073	11.4088	13.1655	8.44055
NR_101635	WBGene00220135	Y18D10A.29	0	0	0	0	0	0	0
NM_060875	WBGene00008133	efsc-1	6.27085	6.8312	5.15884	6.68863	13.8498	14.1638	15.4196
NM_060874	WBGene00008133	efsc-1	11.5292	10.7434	10.6788	9.41034	7.4025	7.89444	5.58393
NM_060884	WBGene00012500	hpo-2	0.124508	0.092012	0.144315	0.230027	0.102157	0.103082	0.131743
NM_001267077	WBGene00012344	ola-1	238.409	269.845	258.702	270.547	289.125	317.063	332.926
NM_001265209	WBGene00012344	ola-1	142.216	112.261	123.085	98.1497	139.449	129.058	126.736
NR_101638	WBGene00220147	Y40B1A.6	0	0	0	0	0	7.29709	8.3934
NM_060954	WBGene00007217	tads-1	130.618	109.793	115.351	104.028	212.155	179.768	212.024
NM_060955	WBGene00007215	oxa-1	50.6871	49.652	46.563	48.6767	24.2892	20.9362	14.4947
NM_001265230	WBGene00219206	W05H12.4	4.26279	1.45379	7.7185	4.9765	8.55755	12.1054	5.98775
NR_101639	WBGene00220148	Y40B1B.10	0	0	0	0	0	0	0
NR_101640	WBGene00220171	Y48G10A.9	1035.24	765.574	1083.99	913.085	1077.14	1467.59	867.852
NM_001265250	WBGene00219288	Y87G2A.25	6.77353	4.99586	8.28125	6.1511	9.89705	11.6938	8.83619
NR_131394	WBGene00255577	mir-8205	0	0	0	0	0	0	0
NR_131395	WBGene00194659	linc-1	5.83076	12.3113	6.75831	9.50489	5.98006	18.7731	6.16958
NR_101642_1	WBGene00220128	Y6B3B.15	0	0	0	0	0	44.2815	50.9343
NM_061015	WBGene00012366	maea-1	17.7733	18.4891	21.0525	19.9154	55.2599	52.2472	79.3842
NR_131396	WBGene00235237	Y71A12B.33	0	0	0	0	0	0	0
NM_001265336	WBGene00045058	gadr-5	3.67843	3.20796	4.3018	4.285	3.23681	2.91592	1.93702
NM_001265335	WBGene00045058	gadr-5	0.000809484	0.00581692	0.00273277	0.00597765	0.00564882	0.00506304	0.00582393
NR_101643	WBGene00219637	linc-124	0	0	0.151081	0	0	0.119905	0
NR_101644	WBGene00220232	ZC334.17	0	0	0	0	0	0	0
NM_061050	WBGene00009827	hmg-6	2.11644	1.17038	3.27082	1.31431	0.723543	0.834393	0.319917
NM_061054	WBGene00009823	gadr-6	13.1068	11.0179	12.8652	12.7435	23.2378	24.8827	16.7421
NM_061060	WBGene00013405	tdpt-1	43.174	44.1493	37.8029	39.5146	29.4856	25.9519	24.0114
NM_061071	WBGene00007988	best-8	1.605	1.09721	2.01281	1.30103	0.809556	1.2223	0.654249
NM_001026707	WBGene00014101	gopc-1	4.74051e-05	0.000101006	3.31108e-05	0.331257	0.403328	1.51711	0.446485
NM_001026706	WBGene00014101	gopc-1	1.5891e-05	0.361183	0.373635	0.000210706	5.25724e-05	0.0017223	0.253825
NM_001129097	WBGene00014101	gopc-1	0.78158	0.494357	0.820306	0.890267	3.03651	2.32296	2.71204
NM_061077	WBGene00014103	best-26	1.22811	1.00842	1.12692	1.0566	0.104963	0.109836	0
NM_061078	WBGene00014102	best-25	0.0218568	0.0230746	0.0886682	0.0237529	0.145707	0.13069	0.0809441
NM_061079	WBGene00008185	best-10	0.176263	0.0372168	0.122582	0.0383109	0.759261	0.632366	0.466264
NM_061081	WBGene00008186	best-11	0.0311007	0.0328335	0.126168	0.0844968	0.191382	0.143048	0.0987237
NR_131397	WBGene00255584	mir-8187	0	0	0	0	0	0	0
NM_001026509	WBGene00013670	hpo-13	29.199	31.3206	29.1712	29.8518	11.62	12.5079	5.82754
NM_001026510	WBGene00013670	hpo-13	0.00444054	0.00496532	0.00448441	0.00431523	0.0053472	0.00304003	0.00590932
NM_001026511	WBGene00013670	hpo-13	11.0114	10.9213	10.5391	10.8971	7.95673	8.84055	9.62743
NR_101645	WBGene00220225	Y105E8A.50	0	0	0	0	0	0	0
NM_001129059	WBGene00013680	rpom-1	12.6666	13.7013	12.8731	12.7138	13.8184	15.2205	12.2814
NM_001129060	WBGene00013680	rpom-1	0.536567	1.87378e-05	2.24498e-05	0.93109	2.08084e-05	0.1053	2.88116e-05
NR_101646	WBGene00220226	Y105E8B.15	0	0	0	0	0	0	0
NM_061148	WBGene00013197	ttm-5	5.77779	3.99636	10.0916	7.33997	3.59631	5.18671	2.52974
NM_061159	WBGene00010587	sol-2	1.93866	1.34208	2.06287	1.65784	2.34684	1.76876	1.05928
NM_001265502	WBGene00043308	F39B2.9	1.68266	0.841457	1.64238	1.25117	2.5432	1.87375	1.49931
NR_101647	WBGene00219940	F39B2.14	0	0.466458	0.512127	2.40085	2.26577	4.0645	2.80509
NM_061172	WBGene00009557	mtcu-1	13.3813	12.8789	12.6236	12.2298	23.7947	21.5453	22.7977
NR_101648	WBGene00220240	ZK270.4	0	0	0	0	0	0	0
NR_101649	WBGene00220241	ZK270.5	0	0	0	0	0	0	0
NR_101650	WBGene00219910	F21F12.2	0	0	0	0	0	0	0
NR_101651	WBGene00219911	F21F12.3	0	0.327765	0	0	0	0	0
NR_101652	WBGene00219927	F31C3.17	116.224	135.629	144.251	217.692	69.8785	66.7283	69.7403
NM_061226	WBGene00009287	psf-2	187.875	161.63	159.082	158.315	90.7973	68.0287	62.7116
NM_061229	WBGene00015287	osta-1	0.370513	0.254252	0.343563	0.342258	0.380001	1.07363	0.9017
NM_061230	WBGene00015288	best-4	0.405928	0.466359	0.719593	0.648741	0.379588	0.417346	0.505314
NM_061231	WBGene00015286	best-3	2.54221	2.49134	3.77963	3.45052	2.81633	4.54889	3.74548
NR_131398	WBGene00255561	mir-8186.2	0	0	0	0	0	0	0
NR_131399	WBGene00255560	mir-8186.1	0	0	0	0	0	0	0
NM_061233	WBGene00015285	gmeb-1	16.1316	13.8182	16.4797	16.5744	32.0752	33.4636	32.2245
NM_001306572	WBGene00017749	rpoa-49	30.6386	31.9387	31.0246	29.0189	36.6301	37.54	28.713
NM_061271	WBGene00020796	mrpl-28	49.1499	47.7415	41.9044	42.1092	51.1794	44.4994	36.8686
NR_101653	WBGene00220095	T25D3.8	2.80977	0	0	0	0	0	2.97304
NR_101654	WBGene00219956	F48A11.10	0	0	0	0	0	0	0
NM_061285	WBGene00021546	laat-1	88.5947	94.3723	89.5059	89.8251	94.157	86.6852	72.2298
NM_061315	WBGene00017038	dmsr-4	1.48724	1.60986	1.63655	1.51397	1.25501	1.02176	0.816711
NM_001267081	WBGene00206366	C03H5.9	1.76399	1.47531	0.982472	1.54357	11.9357	15.4543	7.73261
NM_061322	WBGene00015404	nstp-4	70.5771	74.5324	69.8209	71.9752	149.361	158.5	182.313
NM_001306613	WBGene00235333	C24H12.18	0.581547	0	1.79749	0.421332	3.37982	1.42658	2.05113
NR_131401	WBGene00235088	mir-5593.2	0	0	0	0	0	0	0
NR_131401_1	WBGene00235088	mir-5593.2	0	0	0	0	0	0	0
NR_101655	WBGene00219647	anr-27	0	0.229087	0.251516	0.707465	0.445106	0	0
NM_001267085	WBGene00206416	W04H10.5	3.97214	1.04836	4.60402	4.85632	2.54615	4.11073	2.62684
NR_101656	WBGene00219742	linc-52	0.227532	0	0	0	0	0	0
NM_001267086	WBGene00206417	W04H10.6	9.57088	2.52604	9.70673	9.10103	39.2638	15.4075	16.4564
NM_061378	WBGene00019496	frpr-14	0.461498	0.541346	0.742934	0.919479	2.62953	2.94815	2.60435
NM_001267089	WBGene00206368	Y39F10C.3	0	0	0.12542	0.117593	0	0.0995393	0.114494
NR_101657	WBGene00220060	T07D3.12	0	0	0	12.447	0	0	0
NM_001306647	WBGene00235351	C32B5.18	0	0	0	0	0	0	0
NR_101658	WBGene00220026	M01D1.11	96.2742	0	111.589	52.3131	0	44.2815	0
NR_050823	WBGene00195238	mir-4805	0	0	0	0	0	0	0
NR_101659	WBGene00219708	linc-13	0.484756	0	1.12374	0	2.98301	4.90522	5.89864
NM_061524	WBGene00020741	dlhd-1	0.716523	1.13467	0.795903	0.389342	0.0918588	0.521813	0.15795
NM_001267099	WBGene00021973	emc-2	80.4168	80.1519	71.8872	79.1479	92.6555	93.6467	90.9731
NM_061546	WBGene00018974	fcho-1	40.2705	48.1551	41.1508	46.7297	43.8903	52.4325	38.6044
NM_061547	WBGene00018974	fcho-1	3.23232	0.00286624	0.0348851	0.00234513	0.0134282	0.00289821	0.0135459
NM_061579	WBGene00019209	emc-1	88.4492	97.384	88.3695	91.0763	73.0081	66.2414	60.1629
NM_182211	WBGene00019209	emc-1	1.02973e-05	6.30583e-05	4.40595e-05	5.31359e-05	7.50211e-05	0.000140116	0.194618
NM_061580	WBGene00019207	fgt-1	67.5901	64.0822	77.4319	69.5002	85.9408	98.8371	93.0434
NM_061581	WBGene00019207	fgt-1	1.84037e-05	1.80087e-05	2.33742e-05	1.81396e-05	1.92803e-05	0.156668	1.99777e-05
NR_101660	WBGene00220177	Y51H7BM.2	0	0	0	0	0	0	0
NM_001047325	WBGene00044697	poml-4	1.00575	0.89523	1.14288	0.64294	0.202255	0.38096	0.146065
NM_001267102	WBGene00219239	K05F6.14	0.189561	0.200123	0.65915	0.103003	0.388831	0.174378	0.100288
NM_001267103	WBGene00219321	T07H3.10	0	0	0	0	0	0	0
NM_061631	WBGene00022554	duxl-1	21.2771	19.6825	20.8418	19.8398	69.1443	83.0177	76.5323
NM_061636	WBGene00019038	irld-37	0.050388	0.0797933	0.146009	0.082139	0.0516783	0.0695282	0.026658
NM_061637	WBGene00019036	irld-36	0.185747	0.150843	0.149051	0.372666	0.117233	0.10515	0.0755924
NM_061659	WBGene00018434	ceh-81	0.0145385	0	0.0168513	0	0.104375	0.20061	0.1846
NM_061660	WBGene00018433	ceh-82	1.00401	0.741964	0.698235	1.27296	0.102972	0.123145	0.141647
NM_061661	WBGene00018446	ceh-83	22.8604	22.7369	19.9191	20.3995	18.9995	12.3146	10.6268
NM_061662	WBGene00018447	irld-9	0.0266739	0.0281601	0.0154586	0.014494	0.0273569	0.0736122	0.0564478
NM_001306586	WBGene00018432	irld-33	0.0739887	0.0156222	0.0514553	0.032163	0.0151767	0.027225	0.0156576
NM_001267106	WBGene00206518	F36H5.12	0.113259	0	0	0	0	0	0
NM_001267107	WBGene00206519	F36H5.13	2.06997	1.52971	2.61252	2.54948	13.7285	15.593	12.1924
NM_001267110	WBGene00219271	F36H5.14	9.01458	6.4469	9.77451	8.21652	6.85949	7.22253	10.4615
NR_101661	WBGene00219728	linc-16	5.81337	3.53674	6.53829	4.9792	30.6701	30.7268	30.1825
NM_001027347	WBGene00235352	ZK250.13	0.387581	0.188	0.594936	0.409821	0.107434	0.414354	0.0443355
NM_001306654	WBGene00235354	ZK250.14	0.411846	0.23189	0.38189	0.17903	0.0563189	0.0757717	0.0290519
NR_101662	WBGene00219748	linc-46	1.96547	0.971267	2.18119	1.90875	1.07223	1.34641	1.28321
NM_061747	WBGene00016557	ceh-84	0	0	0	0	0.233391	0.488452	0.240787
NM_061750	WBGene00019137	ceh-85	0	0	0	0	0	0	0
NM_001267118	WBGene00206415	F59H6.14	0.559849	1.18209	1.62227	0.608417	0.574185	0.772511	2.66572
NM_001267119	WBGene00219315	F07E5.12	2.20265	2.13683	2.20804	2.13495	0.915831	0.602391	0.377942
NM_061776	WBGene00004149	trpl-5	0.0269836	0.0284871	0.0625523	0.0293245	0.0415119	0.0496447	0.071379
NM_061792	WBGene00016548	hpo-7	0.0270725	0	0.0313792	0.0294212	0.0832973	0.0249041	0
NR_101663	WBGene00219656	anr-48	0.0246245	0.0779895	0	0.0535214	0.15153	0.0679564	0.104221
NM_001267120	WBGene00219322	C33C12.12	0.121526	0	0.140859	0.132069	0.997104	1.56509	1.67164
NM_001047285	WBGene00016335	gba-1	9.46801	9.21896	8.14524	7.6646	2.27579	4.29495	1.08125
NM_001047286	WBGene00016335	gba-1	0.209144	0.00296361	1.60978	0.506352	2.08944	2.61146	2.37503
NM_061807	WBGene00016340	gba-2	0.76922	1.18371	1.02759	1.33186	0.54823	0.659635	0.496628
NM_061814	WBGene00018783	cbs-2	0.402621	0.40432	0.466669	0.373518	0.95679	1.40922	1.28844
NR_101664	WBGene00219965	F54A3.11	0	0	0	0	0	0	0
NR_050894	WBGene00219267	mir-5548	85.6734	0	0	0	439.336	551.679	271.955
NM_001306560	WBGene00235164	K09F6.13	3.50745	4.21717	5.87227	3.59997	149.686	186.152	301.953
NM_001267121	WBGene00206413	ZK1240.11	0	0	0.229679	0.215347	0.203231	0.546855	0.104836
NM_061850	WBGene00018380	decr-1.1	0.601629	0.86199	0.747146	1.26094	0	0	0
NM_061856	WBGene00017519	hpo-25	0	0	0	0	0	0	0.0478044
NR_101665	WBGene00219696	anr-39	0.0926914	0.145452	0.148316	0.160972	0.0971456	0.139984	0.0616807
NM_061873	WBGene00018355	ceh-86	6.59334	6.40533	8.55683	6.54599	10.2242	9.44467	4.4809
NR_131405	WBGene00255569	mir-8195	0	0	0	0	0	0	0
NR_101666	WBGene00219707	linc-8	7.40442	7.48434	8.90186	6.53444	10.4485	13.6469	9.33494
NR_101667	WBGene00220002	K02F6.11	1.81976	1.92115	4.21848	1.97762	0	0	0
NM_061896	WBGene00019343	nep-18	1.28056	1.18657	1.24935	1.08129	0.623606	0.669507	0.331433
NM_061897	WBGene00017280	usp-39	43.495	45.8262	40.192	42.1258	31.2261	29.6783	21.7393
NR_131476	WBGene00235379	T28H11.31	0	0	0	0	0	0	0
NR_101668	WBGene00219667	linc-66	0.372783	0.0787107	0.086417	0	0.152931	0.205755	0
NR_101669	WBGene00219687	linc-12	45.1314	32.4398	74.5708	44.8725	185.148	104.233	94.4918
NM_061931	WBGene00018022	ceh-87	0.0502604	0	0.116512	0.109241	0.0515473	0.0462347	0.0531809
NM_001027237	WBGene00022447	hpo-20	2.25966	2.23463	1.6784	0.195778	2.43493	1.62607	0.579325
NM_001027236	WBGene00022447	hpo-20	4.99955	5.80732	5.72323	7.07872	5.94122	6.18796	5.16831
NM_061992	WBGene00022448	pinn-1	149.875	123.775	129.786	124.475	93.6285	68.3158	77.5616
NR_101670	WBGene00220227	Y110A2AL.20	0	0	0	0	0	0	0
NM_062001	WBGene00022714	irld-64	0	0	0	0.0152281	0.0143713	0.0128901	0.0148268
NM_062002	WBGene00022711	irld-63	0.026252	0.0138574	0.0152141	0.0285294	0.0269242	0.144896	0.055555
NM_001027349	WBGene00044369	irld-67	0	0	0	0	0	0.107326	0.0617253
NM_062003	WBGene00022715	irld-65	0.0133676	0.0141124	0.0464824	0.0145273	0.0274198	0.122969	0.0707221
NM_062004	WBGene00022716	irld-66	0.0441682	0	0.0170648	0.016	0.0150997	0	0
NM_001047339	WBGene00020431	irld-50	0	0.0288491	0	0	0.0280266	0.0502765	0
NM_001047338	WBGene00020431	irld-50	0	3.41455e-07	0	0	1.89689e-07	1.61838e-07	0.0135819
NM_062006	WBGene00020430	irld-49	0.016111	0	0	0	0	0.0148205	0
NM_001136350	WBGene00077759	irld-51	0	0	0	0.0166322	0.0156964	0	0
NM_062010	WBGene00020428	irld-48	0.028298	0	0	0.030753	0.0145113	0.0650786	0.0149712
NM_001267129	WBGene00206372	B0454.26	0.140687	0.074263	0.0815339	0.229338	0.793593	1.3589	0.893175
NM_062040	WBGene00021292	copb-1	69.4673	87.7207	73.8263	81.102	76.4307	93.3061	99.9665
NM_062054	WBGene00020407	chil-24	5.93622	6.17667	7.37627	6.50698	16.4224	18.9946	22.3371
NM_062096	WBGene00018196	nep-13	0	0.0101108	0.0333021	0.010408	0.0589345	0.0616706	0.0506685
NR_101671	WBGene00219690	linc-10	1.85641	3.42974	3.76553	5.54802	16.6596	14.9426	13.75
NM_062107	WBGene00017454	irld-5	0.205454	0.166847	0.183183	0.188927	2.44753	2.74774	1.3378
NM_001136340	WBGene00077751	irld-27	0.102236	0.107932	0.0888748	0.166658	1.53349	2.26889	1.09529
NM_001267144	WBGene00206522	F14D2.19	1.35618	1.27009	1.34374	1.30743	1.00953	0.402437	0.138869
NR_101672	WBGene00219758	linc-11	2.46747	1.48507	3.07383	1.72921	7.42641	7.14893	5.22171
NM_001267145	WBGene00206385	T06D4.6	1.83975	0.896424	0.492095	0.615184	3.77371	2.34331	2.09639
NM_062128	WBGene00020292	nep-19	0.00863739	0.00911864	0.0400457	0.0469335	0.00885855	0	0
NM_062129	WBGene00020293	nep-20	0.104147	0.0399818	0.0768185	0.14405	0.495228	0.531284	0.330597
NM_062130	WBGene00017554	nep-9	0.129182	0.0974143	0.117647	0.120334	0.0189272	0.0169765	0
NM_062131	WBGene00017555	nep-10	0.208584	0.172335	0.241765	0.216823	0.0279032	0.0750823	0.0383834
NM_062132	WBGene00017553	nep-8	0.0769983	0.0609663	0.156182	0.156896	0.0493562	0.0531232	0.0712885
NM_062133	WBGene00017552	nep-7	0.042447	0.0298747	0.0491995	0.0615059	0	0.0130157	0
NM_062136	WBGene00017550	nep-6	0.0177227	0.0187102	0.0513551	0.00963011	0.0545296	0.0733644	0.0281289
NM_062137	WBGene00017557	nep-11	2.41313	2.33079	3.18669	3.51558	4.25259	5.37438	4.94722
NM_182128	WBGene00017557	nep-11	2.17239e-05	0.102731	2.09625e-05	2.94568e-05	1.20712e-05	3.04719e-05	0.149883
NM_062139	WBGene00015841	skpo-2	0.158778	0.0838123	0.378297	0.134207	0.117609	0.129831	0.158671
NR_101673	WBGene00219757	linc-71	0	0	2.7299	0	0	0	0
NM_062168	WBGene00021116	ncs-6	0.955256	0.93972	1.05689	1.25047	3.00595	3.65477	3.17013
NR_101674	WBGene00219755	linc-17	2.84389	1.50117	3.62592	2.26644	2.52782	5.40662	5.01524
NR_101675	WBGene00219756	linc-68	4.14113	2.73242	4.7999	3.23465	14.3342	19.8805	21.2242
NM_062192	WBGene00021711	wago-11	0.882189	0.862862	0.548856	0.888227	0.0731806	0.119342	0.0960907
NM_001267153	WBGene00219238	M151.9	1.97711	1.91166	1.51306	1.69411	0.997619	1.13672	0.593402
NM_062278	WBGene00016778	nep-3	0.298929	0.141469	0.131424	0.100819	0.486305	0.426702	0.283579
NR_101676	WBGene00220021	K10G6.10	0	0	0	0	1.92467	5.17892	3.97133
NR_101677	WBGene00220022	K10G6.11	290.65	369.128	884.935	1321.09	474.17	1.76408e-62	124.918
NM_001267156	WBGene00206374	K10G6.9	55.0325	56.8358	76.2672	66.3075	244.172	242.118	336.724
NR_101678	WBGene00220133	Y14H12A.4	0	0	0	0	0	0	0
NM_062305	WBGene00019487	ephx-1	6.39883	7.17175	7.63846	7.57851	3.57203	5.32462	3.09101
NM_062306	WBGene00019487	ephx-1	9.4525	9.33839	9.15402	8.32233	6.0053	9.82878	6.59482
NM_062315	WBGene00021053	gadr-4	3.08588	2.09603	3.01182	2.50245	1.95984	1.19887	0.666505
NR_101679	WBGene00219744	anr-41	0.611627	0.15581	0.000589132	5.43163e-06	6.15118e-06	1.54754e-06	0.230186
NR_101680	WBGene00220063	T08H4.9	0	0	0	0	0	0	0
NM_062337	WBGene00017947	mth-2	1.60004	1.9162	1.79593	2.1581	0.652039	0.807039	0.538601
NM_062338	WBGene00017948	mth-1	0.473521	0.424919	0.717424	0.720441	0.232416	0.367143	0.203994
NM_001267157	WBGene00206414	F31D5.7	2.9242	2.24254	3.99691	3.02798	3.28201	3.85733	1.98491
NM_001276730	WBGene00021798	Y52E8A.6	0.0635625	0.134208	0.0736739	0.103615	0.146678	0.190032	0.134512
NM_062365	WBGene00019218	madf-3	74.7778	73.2407	69.1789	70.0147	78.5504	65.5439	55.7737
NM_062366	WBGene00019217	athp-2	33.8178	38.3332	32.3973	33.7731	24.4459	24.0222	15.8456
NM_062394	WBGene00020251	camt-1	6.9633	6.9329	9.73313	10.4601	7.16355	8.61944	5.92452
NM_001027143	WBGene00020251	camt-1	27.4612	24.6728	33.5905	33.0725	25.8764	32.0626	24.6968
NM_062395	WBGene00020251	camt-1	2.83075	3.61404	0.775999	1.13807	5.76081	5.88086	5.13885
NR_101681	WBGene00220009	K07E1.2	0.59403	0	0	0	0.609241	0	0
NR_101682	WBGene00219933	F35D11.12	0	0	0	0	0	0	0
NM_062456	WBGene00017842	nep-12	0.604063	0.4806	0.740745	0.580355	0.341191	0.257706	0.31495
NR_101683	WBGene00219657	linc-139	0.0447734	0.015756	0.0518959	0	0	0	0
NM_062476	WBGene00017387	mpst-4	0.0843628	0.0296878	0.130378	0.0305605	0.028841	0.0258685	0.029755
NM_001027094	WBGene00019888	btbd-10	8.96361e-100	2.22861e-36	9.58745e-40	5.07443e-42	3.49906e-65	0.229254	0.27495
NM_170983	WBGene00019888	btbd-10	71.638	82.642	74.8768	83.3905	85.4414	98.2289	80.8624
NM_170984	WBGene00019888	btbd-10	1.31116	1.10277	2.16859	1.63764	26.8494	23.4959	41.8109
NM_062493	WBGene00019888	btbd-10	2.30342e-05	4.18814e-10	5.01027e-07	2.62512e-08	0.00061452	0.000126268	0.000166874
NM_001267166	WBGene00206517	T27F7.12	0	0	0	0	0	0	0
NM_062518	WBGene00020866	vps-24	131.78	114.829	120.1	116.965	212.584	187.023	231.562
NM_001267169	WBGene00206373	C27A2.12	0.820143	0.92881	0.864192	0.599597	0.321164	0.411519	0.394455
NM_170987	WBGene00016162	crh-2	43.0171	44.0257	46.945	46.7084	79.842	100.326	91.3645
NM_001306557	WBGene00016162	crh-2	20.7968	19.9327	15.4322	18.2425	20.6491	19.0137	4.793
NM_170989	WBGene00016162	crh-2	1.23208	1.27927	3.76911	2.24313	0.582316	0.880103	1.59576
NM_170988	WBGene00016162	crh-2	27.9322	29.7909	23.218	26.8733	35.8982	35.7079	20.2176
NM_062573	WBGene00016415	ampd-1	35.1095	36.2264	41.6832	39.693	52.2814	69.0164	84.0885
NM_001047287	WBGene00016415	ampd-1	1.41018	1.9281	0.965778	1.20942	4.41323	4.21073	9.9067
NM_062572	WBGene00016415	ampd-1	0.957504	0.733614	1.72234	1.62809	1.97962	2.55231	2.49279
NR_101684	WBGene00219731	linc-49	3.05926	1.61486	3.15194	2.58585	0	0.78173	0
NM_062586	WBGene00016909	frpr-4	0.280569	0.315948	0.151761	0.284582	0.671424	0.877528	0.435413
NR_101685	WBGene00219672	anr-54	0	0	0.0190436	0	0.134805	0.136025	0.121692
NR_101686	WBGene00219881	F08B1.8	0	0	0	0	0	0	0
NM_062615	WBGene00017144	brap-2	37.3998	35.5057	34.5628	36.027	23.7483	19.6757	14.2558
NR_101687	WBGene00219873	EEED8.19	0	0	0	0	0	0	0
NM_001306578	WBGene00017132	tofu-6	96.6253	93.51	84.1392	87.2759	101.671	86.2192	90.0119
NR_101688	WBGene00219704	linc-127	0.121526	0.128297	0.140859	0	0	0	0
NR_101689	WBGene00219980	F56D1.17	0	0	0	0	0	0	0
NM_001027036	WBGene00018961	mrps-16	204.807	191.394	185.339	183.666	159.639	126.788	128.901
NM_062642	WBGene00017394	cal-8	0.934663	0	1.26391	0.677165	4.47345	6.09025	7.17007
NR_101690	WBGene00219890	F12A10.13	0	0	0	0	0	0	0
NM_062643	WBGene00017393	nep-5	0.0198752	0.0104913	0.0230369	0.0215994	0.0305762	0.0182833	0.0315452
NM_001267171	WBGene00219272	C17C3.24	0	0	0	0	0	0	0
NM_001306655	WBGene00235269	F59E12.15	13.5264	11.5751	11.0113	12.3493	14.1458	11.4481	10.8091
NR_101691	WBGene00219823	C18A3.24	0	0	0	0	0	0	0
NM_182216	WBGene00015942	osta-2	5.20802e-05	6.07964e-05	0.0001653	1.59726e-05	2.88527e-05	2.35382e-05	5.34083e-05
NM_062718	WBGene00015942	osta-2	0.0861677	3.35488e-14	0.109771	5.46914e-09	0.0973106	1.47205e-11	0.0934974
NM_171004	WBGene00015942	osta-2	12.3855	12.9284	13.0938	12.9249	20.9865	21.8615	21.6584
NR_101692	WBGene00219674	linc-122	0	0	0	0.128568	0.242669	0.108829	0
NR_101693	WBGene00219675	linc-44	15.098	5.31307	4.6666	5.46925	11.3553	21.296	20.2354
NM_062750	WBGene00022877	wago-5	0.0725092	0.036452	0.0800418	0.0150094	0.0247886	0.012705	0.0219207
NM_062763	WBGene00022874	nep-25	0.0653348	0.0413851	0.121165	0.113604	0.147417	0.276468	0.235046
NR_101694	WBGene00219988	F59G1.14	0	0	0	0	0	0	0
NM_001267175	WBGene00206371	F28B12.6	0.291981	0.0770624	1.35372	1.03126	4.79132	5.30474	6.02448
NM_062803	WBGene00020023	frpr-16	0.517183	0.454999	0.599456	0.281025	0.530426	0.892047	0.547236
NR_101695	WBGene00220043	R12C12.13	0	0	0	0	0	0	0
NM_062820	WBGene00017686	tpp-2	76.4595	81.2184	70.6988	75.0967	55.857	50.3544	40.6705
NM_062821	WBGene00017683	rbbp-5	66.8498	61.7647	59.1225	60.1405	48.9126	40.1517	32.066
NR_101696	WBGene00219679	anr-22	0.372694	0	0	0	0	0	0
NM_062823	WBGene00016236	cec-9	9.99024	9.76527	8.77201	9.43648	16.4987	19.7506	13.037
NM_062840	WBGene00016246	daf-37	0.387515	0.383537	0.598881	0.383758	1.18403	1.25509	1.15322
NM_001267179	WBGene00194710	mks-2	0.162303	0	0.470304	0.0881914	0	0.149303	0.171734
NM_001267182	WBGene00206412	T24H7.8	23.6568	13.448	14.7647	7.9105	50.3915	46.872	61.616
NM_062846	WBGene00020783	blos-4	77.0581	66.499	73.195	71.5812	50.8292	30.0016	40.2605
NR_131412	WBGene00219306	linc-4	2.84233	2.48383	2.25412	1.93611	1.86902	1.62635	1.61167
NR_101698	WBGene00219839	C29F5.11	0	0	0	0	0	0	0
NR_101699	WBGene00219713	linc-27	0	0	0	0	0	0	0
NR_101700	WBGene00220096	T25D10.11	0	0	0	0	0	0	0
NM_062888	WBGene00020800	zig-10	0.663259	0.00754266	0.529932	0.185021	0.918104	0.100634	1.56489e-05
NM_001129172	WBGene00020800	zig-10	1.37775	1.23845	2.65936	2.14039	2.01904	2.52723	2.15008
NM_062901	WBGene00020897	del-10	0.639937	0.724727	0.836141	0.828222	3.53818	2.48316	3.02859
NM_001027096	WBGene00019904	twk-49	1.83005	0.0869097	1.75276	2.581	4.01933	5.98662	6.20728
NM_001027097	WBGene00019904	twk-49	0.565534	1.89878	1.80178	0.000226358	8.27498e-05	0.00012117	0.000325563
NM_001267188	WBGene00206514	R05G9.5	0.385411	0.254303	0.335041	0.314135	0.741149	0.620446	0.560734
NM_062921	WBGene00016974	lron-15	0.26525	0.229115	0.536632	0.345913	0.435267	0.443644	0.637871
NR_101701	WBGene00219902	F18C5.15	0	0	0	1.14771	0	0	0
NM_062924	WBGene00017559	mpz-3	0.0733552	0.0258141	0.141707	0.053146	0.100311	0.179946	0.155236
NR_101702	WBGene00219702	linc-138	0.0888701	0.0268062	0.0441461	0.0689856	0.0260416	0.0467154	0.0268669
NM_062950	WBGene00020582	oig-8	0.514378	0.543038	0.941377	0.617844	0.888504	1.36973	1.14583
NR_101703	WBGene00219826	C18H9.12	0	0	0	0	0	0	0
NR_051265	WBGene00219246	mir-2953	0	0	0	0	0	0	0
NR_101704	WBGene00219797	C04A2.16	0	0	0	0	0	0	34.6875
NM_001267190	WBGene00206529	C04A2.15	4.53034	0.434796	2.86419	2.0141	0	1.13658	1.96102
NM_001306570	WBGene00016623	psmd-9	95.5031	84.1091	86.1734	79.5992	106.844	77.3838	103.626
NR_101705	WBGene00219680	linc-35	15.5291	5.85512	8.99973	13.2599	58.0188	72.4467	75.1153
NM_001306550	WBGene00017699	flcn-1	3.22146e-108	2.45897e-103	4.57675e-87	2.46513e-68	0.225241	0.190359	1.3408e-32
NM_001306551	WBGene00017699	flcn-1	17.8826	19.8815	14.5384	16.4823	7.53506	6.76954	3.12681
NM_001276732	WBGene00017699	flcn-1	0.00340087	0.00522798	0.00323689	0.000754584	0.000344626	0.000509143	0.000102693
NM_001306549	WBGene00017699	flcn-1	13.9151	14.8643	14.2587	17.3953	10.3733	11.3388	6.92352
NM_001026935	WBGene00017699	flcn-1	5.45328e-44	1.51637e-43	4.95444e-39	1.07241e-30	3.66489e-21	4.48646e-29	9.84724e-16
NM_001306552	WBGene00017699	flcn-1	1.96917	1.69045	2.28339	1.65262	1.02579	1.09244	1.31182
NM_001026937	WBGene00017699	flcn-1	9.99343	5.80036	15.5175	12.5057	7.11498	11.9068	4.63134
NM_001306553	WBGene00017699	flcn-1	19.5292	21.869	22.0548	19.6776	16.9843	15.5562	8.54135
NR_051302	WBGene00199918	mir-8192	0	0	0	0	0	0	0
NR_101706	WBGene00219818	C15F1.15	0	0	0	0	0	0	0
NR_101707	WBGene00219664	linc-73	0.11092	0.1171	0.514258	0.120542	1.25136	0.306106	1.05628
NM_063036	WBGene00016889	lst-6	19.9342	21.0845	19.8429	20.9578	15.3666	15.7175	9.71347
NM_182263	WBGene00016890	lst-5	3.64686	2.93762	3.32296	2.77197	1.40529	1.08593	0.981423
NM_001267193	WBGene00206521	T02G5.15	7.21619	1.08832	11.9488	2.24063	3.17184	1.89663	2.18157
NM_063063	WBGene00020168	mct-5	39.7941	38.1472	33.9273	37.0856	17.7055	14.6078	10.1311
NM_063080	WBGene00020319	npr-31	0.894848	0.617693	0.438815	0.579747	0.564776	0.522399	0.418797
NR_101708	WBGene00219872	E04F6.17	0	0	0	0	0	0	0
NR_101709	WBGene00219686	linc-125	0.0463244	0.0427923	0.0201351	0.0314645	0.0178165	0.0532675	0.0367622
NR_101710	WBGene00219928	F32A5.11	0	0	0	0	0	0	0
NM_063111	WBGene00017968	skpo-3	6.26506	6.25762	8.29896	6.1153	0.690468	1.78969	0.615844
NM_063110	WBGene00017968	skpo-3	1.95331	1.74111	2.96322	2.94859	0.593602	0.729576	0.363653
NR_101711	WBGene00219844	C30G12.9	0	0	0	0	0	0	0
NR_101712	WBGene00219655	linc-107	1.14374	0.704356	1.10474	0.310741	0.0977523	0.526066	0.2017
NM_063126	WBGene00018475	mrpl-14	80.5402	74.0173	73.9462	76.4885	126.597	117.814	130.864
NM_063127	WBGene00018475	mrpl-14	48.7882	49.1537	48.3813	43.7121	59.1079	45.7272	51.3907
NM_001267194	WBGene00018474	cnep-1	67.8467	66.8837	62.3288	65.1033	63.0922	56.3038	35.3713
NM_001267195	WBGene00018474	cnep-1	5.1851e-05	5.68307e-05	5.6558e-05	0.000110409	4.6784e-05	4.56409e-05	0.000122808
NR_101713	WBGene00219697	linc-169	4.63686	3.51451	6.01759	4.30694	1.74778	1.71348	0.838684
NM_182194	WBGene00018395	mtch-1	1005.19	817.297	847.735	809.251	394.163	355.543	310.133
NM_063144	WBGene00018395	mtch-1	166.11	175.202	162.249	175.283	116.607	99.3862	83.156
NM_182250	WBGene00023416	spi-1	3.20038	2.9812	6.32796	4.09179	13.3224	14.3738	16.7325
NM_063190	WBGene00018042	mks-3	0.0913662	0.0741976	0.252532	0.122206	0.317158	0.193957	0.245407
NR_101714	WBGene00220037	R07G3.16	0	0	0	0	0	0	0
NM_063203	WBGene00017547	alfa-1	0.000450947	0.000324589	0.000430553	0.000349593	0.648835	0.610833	0.000380748
NM_063202	WBGene00017547	alfa-1	31.6559	32.3247	29.3859	30.768	19.1252	17.0207	12.0141
NR_101715	WBGene00219901	F18A1.11	0	0	0	0	0	1.72631	0
NM_063212	WBGene00017549	pid-1	42.2508	38.8816	30.599	32.4679	46.294	33.1749	35.4779
NM_063215	WBGene00015205	moa-2	242.521	215.818	212.68	218.37	367.728	322.607	337.229
NR_101716	WBGene00219780	B0228.10	40.0389	24.8646	35.4887	48.6315	28.9865	25.999	19.9367
NM_171025	WBGene00015512	mthf-1	14.0829	15.4014	14.0953	13.3891	2.98874	3.71045	1.63785
NM_171024	WBGene00015512	mthf-1	118.361	119.587	112.533	102.489	83.9677	86.3959	75.9385
NM_063235	WBGene00015513	snpc-1.1	51.1694	46.4795	40.978	42.1063	42.5787	35.8541	32.5834
NM_063242	WBGene00011458	irld-47	0	0.014617	0	0.0300933	0	0.0254731	0.0146501
NR_101717	WBGene00220058	T05A6.20	0	0	0	0	0	0	0
NR_101719	WBGene00219606	linc-133	0.00812724	0.0102121	0.023963	1.73627e-08	0.0569001	0.0448778	2.24185e-08
NM_063251	WBGene00011636	cec-3	112.798	110.063	102.086	103.426	156.703	127.978	116.972
NM_063252	WBGene00011637	sds-22	51.4373	47.9203	46.5262	44.9568	67.6972	57.1028	63.3971
NM_063260	WBGene00011350	perm-1	59.0324	73.257	58.9286	68.0122	30.6232	23.3779	15.9448
NR_101720	WBGene00219604	linc-93	0.0942863	0	0.218571	0	0.0967006	0.0867343	0.0997652
NM_001129196	WBGene00014989	best-23	0.746326	0.445824	0.880031	0.789321	1.83417	2.02847	1.52486
NR_023956	WBGene00014989	best-23	0.061464	0.172533	0.270908	0.185762	1.93662e-06	1.72161e-06	2.36542e-06
NM_001267201	WBGene00014051	spv-1	0.0346731	1.07491e-08	5.22821e-05	2.58872e-06	2.06473	2.94391	3.2471
NM_063266	WBGene00014051	spv-1	0.751179	1.14357	1.29794	1.37815	6.84696	3.32717	8.46702
NM_001276734	WBGene00014051	spv-1	1.46543	0.942859	0.000214116	0.686421	2.51386	3.3651	3.10221
NM_001267200	WBGene00014051	spv-1	0.0482705	0.00044281	1.13033	0.000588633	0.0115035	0.00312715	0.00314432
NM_063265	WBGene00014051	spv-1	0.597288	1.04726	1.56165	1.63714	1.03701	1.3118	1.81241
NM_063278	WBGene00007433	swsn-7	71.8913	79.542	70.205	75.5943	48.1778	50.7896	29.8072
NM_063280	WBGene00007434	arp-6	64.0797	56.9926	53.9325	54	50.2074	43.5261	33.99
NM_182153	WBGene00011510	pdha-1	316.862	425.999	404.629	442.621	366.696	311.055	338.841
NM_063292	WBGene00011510	pdha-1	137.534	38.2676	77.9844	33.5334	30.3549	40.4897	2.8869
NM_001027151	WBGene00011511	gpcp-2	55.4789	59.4821	48.8508	53.1754	60.781	63.7165	50.4578
NM_001027150	WBGene00011511	gpcp-2	5.03673	6.42936	6.9472	6.80572	1.50727	3.58693	0.55094
NM_063299	WBGene00008051	lron-4	0.633276	0.405521	0.830282	0.56411	0.724024	0.706704	0.494318
NR_101722	WBGene00219853	C41C4.17	0	0	0	0	0	0	0
NR_101721	WBGene00219852	C41C4.16	0.221709	0.234062	1.02791	0	1.13693	1.42766	1.17296
NR_101723	WBGene00219854	C41C4.18	0	0	0	0	0	0	0
NR_101724	WBGene00219855	C41C4.19	0	0	0	0	0	0	0
NR_101725	WBGene00219856	C41C4.20	0	0	0	0	0	0	0
NM_001267214	WBGene00219289	T05C12.15	64.5832	96.8897	59.0977	40.634	80.1816	103.186	129.479
NM_063313	WBGene00011467	decr-1.3	0.0486985	0.0257059	0.169336	0.185231	0.0249727	0	0.103057
NM_063346	WBGene00010458	mrpl-10	77.7407	73.4139	67.0615	70.5164	63.6507	52.1138	50.2081
NM_001026918	WBGene00008819	shw-1	1.56893	1.73299	1.52973	1.7664	3.61506	4.14282	4.38658
NM_063351	WBGene00008819	shw-1	1.20774	0.00424809	0.0118942	4.24179	2.762	1.16939	0.000246189
NM_182142	WBGene00008819	shw-1	6.89806e-07	1.60388	0.000125558	8.87318e-11	6.04864e-11	0.992965	1.04357
NM_182141	WBGene00008819	shw-1	0.000179792	0.00216764	3.29801	7.5815e-08	1.70047e-07	0.00198755	1.5031
NM_182140	WBGene00008819	shw-1	1.17874e-09	1.62499e-08	1.20166e-06	3.71132e-14	4.81325e-15	7.18472e-07	2.28137e-09
NM_182139	WBGene00008819	shw-1	3.90767	2.57748	0.658629	0.00857688	0.0998927	0.949487	0.0124143
NM_182138	WBGene00008819	shw-1	2.71254e-23	2.01058e-10	3.9355e-24	4.78127e-41	2.4031e-37	6.0506e-20	9.80987e-30
NM_182137	WBGene00008819	shw-1	2.15379e-73	1.78717e-52	1.32125e-64	4.21245e-84	2.05395e-108	1.47013e-49	1.63073e-67
NM_063367	WBGene00009897	skpo-1	96.8718	97.2964	89.9247	90.2101	87.3103	114.682	45.4987
NM_063370	WBGene00009899	efl-3	9.67525	7.96764	13.6938	10.5265	14.5695	17.286	9.71515
NM_063397	WBGene00011757	cht-2	0.125476	0.187662	0.133317	0.170452	0.0643444	0.0577128	0.0774475
NM_063399	WBGene00011759	mrps-18B	91.516	82.4887	82.1674	81.1841	114.231	95.5063	90.4516
NM_063404	WBGene00012177	decr-1.2	0.0243492	0.0257059	0.141114	0.0793848	0.524427	0.694368	0.412226
NM_063417	WBGene00009202	aptf-4	36.3448	33.9721	35.9048	39.3915	34.9673	26.5155	16.2406
NM_063418	WBGene00009203	aptf-3	29.723	32.9237	27.1901	30.1681	19.5576	15.966	9.03681
NR_101726	WBGene00220082	T22C8.10	0	0	0	0	0	0	0
NM_063439	WBGene00008431	piga-1	29.8411	26.3817	24.0081	24.9097	13.4446	10.514	6.8613
NM_001026884	WBGene00008430	hgap-2	0.000455598	0.000883362	0.00147723	0.000591241	0.00179044	4.09765e-06	2.43364e-05
NM_001267239	WBGene00008430	hgap-2	0.000112624	0.000219448	0.000366841	0.000115528	0.000477878	1.71978e-06	7.72674e-06
NM_001267243	WBGene00008430	hgap-2	23.1516	19.3828	20.811	20.0098	17.6817	23.2219	14.5026
NM_001267238	WBGene00008430	hgap-2	2.39383	2.16196	2.39871	1.70178	2.26815	2.72902	1.5679
NM_001026883	WBGene00008430	hgap-2	0.000211353	0.70203	0.592866	0.00014992	1.07785	0.00100795	0.000784302
NM_001267240	WBGene00008430	hgap-2	5.73161e-05	0.103637	0.0920964	3.40849e-05	0.173405	0.000268811	0.000190713
NM_001267242	WBGene00008430	hgap-2	0.531776	0.459723	0.47721	0.468366	0.421924	0.307151	0.231171
NM_001267237	WBGene00008430	hgap-2	0.0793071	0.0728588	0.075834	0.0551237	0.0724197	0.0514924	0.0342948
NM_001267244	WBGene00008430	hgap-2	3.14003	5.28174	4.09101	5.9371	2.10839e-10	1.55213	1.19702
NM_001267241	WBGene00008430	hgap-2	0.391058	0.671373	0.552079	0.582053	2.17211e-10	0.22571	0.16029
NR_101727	WBGene00219565	linc-120	0.0058215	0.00614586	0	0.00632653	0.0298528	0.0107104	0.0369587
NM_001267249	WBGene00206355	C34C6.10	1.16611	4.3088	2.70323	2.53455	1.79396	2.68177	1.85081
NM_001267254	WBGene00206502	T01B7.13	0.683522	0.360803	0.396128	0.371409	0.350512	0.314387	0.72324
NM_063456	WBGene00011312	trcs-2	86.9949	95.5812	81.9045	88.8575	109.798	103.18	79.8271
NM_182125	WBGene00010681	mak-1	25.4039	30.4792	26.9073	30.5855	60.1701	91.336	87.5559
NM_063459	WBGene00010681	mak-1	132.258	148.591	108.007	107.728	193.382	223.653	287.673
NM_001027068	WBGene00010681	mak-1	0.499421	7.41812e-14	8.02249e-14	4.34136e-09	1.83078	9.52706e-08	4.71258
NM_001027069	WBGene00010681	mak-1	6.69107	7.1722	3.74835	5.03766	5.75175	6.51615	3.47216
NM_001027067	WBGene00010681	mak-1	13.953	8.54095	4.60222	7.33752	31.0215	27.2449	34.2455
NR_101728	WBGene00219590	linc-72	5.23437	4.95925	4.0447	1.89616	1.23886	2.71622	1.27812
NR_101729	WBGene00220061	T07D4.7	0	0	0	0	0	0	0
NM_063498	WBGene00011883	mrpl-50	77.8877	71.6525	71.9839	70.4343	116.227	98.0725	110.458
NM_063504	WBGene00007690	sftd-3	56.4693	47.7348	49.749	48.9654	67.3938	56.5029	56.9185
NR_101730	WBGene00220090	T24B8.22	0	0	0	0	0	0	0
NR_101731	WBGene00220091	T24B8.23	0	0	0	0	0	0	0
NR_101732	WBGene00220092	T24H10.12	0.273036	0.288249	0	0	0.280028	0.251167	0.577804
NR_101733	WBGene00219819	C16D2.4	0	0	0	0	0	0	0
NM_063565	WBGene00004174	abu-14	0.940757	0.547259	2.62589	1.10583	0.610413	0.565163	0.975109
NR_101734	WBGene00219610	anr-51	0.0396825	0	0.0344964	0.0230088	0	0	0.0104971
NM_182118	WBGene00006510	mtrr-1	24.915	32.676	23.9813	21.848	17.493	20.0471	11.3661
NM_063577	WBGene00006510	mtrr-1	60.2326	59.6075	52.6177	53.6919	33.854	31.9341	22.0004
NR_101735	WBGene00219867	D2013.13	0	0	0	0	0	0	0
NR_101736	WBGene00219945	F42A8.4	0	0	0	0	0	0	0
NR_051529	WBGene00206526	C06C3.14	0	1.01364	4.14858	0.695514	5.78362	2.64999	1.85518
NM_001267280	WBGene00206481	Y51B9A.14	0	0	0	0.405026	0	0.685685	0
NM_063606	WBGene00013085	mpz-6	0.0510523	0.0538968	0.147934	0.110962	0.0785392	0.0939263	0.0540188
NM_063610	WBGene00010941	gss-1	52.9037	51.554	47.5985	48.6308	31.6803	27.9822	21.6528
NM_063617	WBGene00010945	chil-13	5.68982	4.95856	5.44403	3.51137	3.11982	4.13217	3.63562
NM_063618	WBGene00011159	chil-17	0.0318684	0.016822	0.055407	0.0173165	0.0817111	0.0586317	0
NM_063619	WBGene00011158	chil-16	0.125749	0.0663778	0.109315	0.0341645	0.612603	0.563925	0.465697
NM_063620	WBGene00011157	chil-15	0	0	0	0	0.0164778	0	0
NM_063623	WBGene00011161	chil-18	0.0648033	0.0513105	0.0751121	0.123244	3.55575	2.8018	4.40555
NM_063625	WBGene00011162	chil-19	0.220753	0.136617	0.291162	0.165451	0.0702637	0.077027	0.048327
NM_063626	WBGene00011163	chil-20	0	0	0	0	0.0202484	0.0908076	0.0208901
NM_063628	WBGene00011164	chil-21	0.19627	0.0997657	0.244344	0.126398	0.0670985	0.0468091	0.0307667
NM_063630	WBGene00011166	chil-22	1.42332	0.807863	1.50783	1.33058	0.4395	0.408282	0.0647754
NR_051539	WBGene00011167	chil-23	0.271035	0.295454	0.269147	0.297554	0.0266215	0.0802853	0.0230849
NM_001267283	WBGene00011167	chil-23	0.186018	0.0538285	0.285993	0.165022	0.0627863	3.21069e-07	1.50174e-06
NM_063632	WBGene00011846	chil-25	0.418738	0.294713	0.66511	0.539336	0.652143	0.656264	0.557941
NM_063633	WBGene00011847	chil-26	0.0202005	0.0426521	0	0.0658589	0.103589	0.0743301	0.0854974
NM_063634	WBGene00011848	chil-27	0.0172597	0.0182214	0.0600162	0.0375141	0.0885085	0.0793865	0.127839
NM_001267287	WBGene00219290	AH6.17	0	0	0	0	0	1.10054	0
NM_001267288	WBGene00219291	F35H8.12	0	0	0	0	0	0	0
NM_001026887	WBGene00008459	mrpl-53	94.818	87.0262	85.6704	78.9248	89.7264	85.674	81.8767
NR_101737	WBGene00220071	T15H9.8	0.23692	0	0	0	0	0.217944	0.250687
NM_001267300	WBGene00219214	T10B9.14	17.7391	0	0	0	0	0	0
NM_063721	WBGene00014162	chil-9	0.0149117	0.0314851	0.0172838	0.0324106	0.030587	0.0685866	0.0315564
NM_001267301	WBGene00202513	ZK938.10	0	0.355671	0	0	0.172763	0.309915	0
NM_063724	WBGene00007469	chil-4	0.120219	0.126918	0.139344	0.0979865	0.169534	0.193533	0.365715
NM_063725	WBGene00007471	chil-6	0.223675	0.141683	0.138271	0.178259	0.244696	0.35665	0.284007
NM_063726	WBGene00007470	chil-5	0.328901	0.20518	0.138626	0.16247	0.275992	0.275052	0.379651
NM_063727	WBGene00007467	chil-3	0.26225	0.293148	0.250327	0.117353	0.158215	0.0851451	0.0979372
NM_001267302	WBGene00206395	C08H9.18	0	0	0	0	0	0	0
NM_001047275	WBGene00007465	chil-1	0.132423	0.155431	0.0853241	0.24	0.256695	0.148976	0.155783
NM_001047274	WBGene00007465	chil-1	0.000863848	0	0	0	1.99742e-06	2.30753e-05	0
NM_063730	WBGene00007472	chil-7	0.635159	0.372527	0.507159	0.199409	0.332949	0.116857	0.358436
NM_063731	WBGene00007473	chil-8	1.11384	0.951917	0.942654	0.826191	0.380786	0.406596	0.261903
NM_063732	WBGene00007466	chil-2	0.11151	0.0784817	0.15079	0.100986	0.22873	0.205156	0.294973
NM_001027115	WBGene00011271	flad-1	16.2375	35.8141	14.4815	33.3837	25.2845	30.4065	14.0536
NM_001027116	WBGene00011271	flad-1	19.099	0.369424	18.3853	1.82359	11.9321	0.0201027	5.40338
NM_001267304	WBGene00011271	flad-1	4.83201e-10	1.90305e-60	5.14544e-18	2.58337e-55	6.78309e-37	1.69391e-58	5.74202e-16
NM_001267305	WBGene00011271	flad-1	4.25951e-11	7.96501e-97	1.17762e-19	1.67827e-78	2.1232e-53	3.39465e-82	4.33599e-32
NR_101738	WBGene00220247	ZK892.10	0	0	0	0	0	0	0
NM_063768	WBGene00009944	mtcu-2	28.3414	29.0669	26.0047	27.4075	17.0687	14.0761	7.57018
NR_101739	WBGene00219825	C18D1.21	0	0	0	0	0	0	0
NM_001267306	WBGene00206354	F27E5.9	3.48209	2.01593	22.9142	12.8174	1.38242	2.27323	2.61476
NM_063807	WBGene00011334	mrps-14	100.523	94.248	91.9287	89.1628	117.832	100.285	88.9639
NM_063808	WBGene00011333	nrde-2	29.4153	29.9397	29.8848	30.3067	36.4416	42.1392	27.6555
NM_001027368	WBGene00014171	nep-26	2.66428	1.29158	1.56831	1.16891	5.3857	4.31635	3.40945
NM_001027369	WBGene00014171	nep-26	4.57783e-05	1.42882	1.63617	1.88916	12.8154	11.4464	11.7399
NR_101740	WBGene00219642	anr-52	0	0	0	0	0	0	0
NR_101741	WBGene00219806	C07E3.17	0	0	0	0	0	0	0
NM_063831	WBGene00007416	ceh-57	0.0213121	0.0224996	0.247024	0.046322	0.743167	0.352892	0.699067
NM_063833	WBGene00007417	ceh-58	26.4448	24.1655	28.2898	26.1308	20.3182	14.2253	10.3254
NR_101742	WBGene00220052	R166.10	0	0	0	0	0	0	0
NR_101743	WBGene00220053	R166.11	0	0	0	0	0	0	0
NR_101744	WBGene00219803	C06A1.12	423.136	339.318	304.805	329.3	168.705	106.52	114.507
NM_063878	WBGene00007555	dohh-1	63.3558	59.6637	65.8011	65.1626	269.52	283.693	357.051
NM_063880	WBGene00007564	mrps-22	51.11	53.4813	46.6485	49.5499	31.3518	30.1347	18.7281
NM_063889	WBGene00007561	ccm-3	114.351	112.748	106.276	101.347	108.131	88.0417	66.1097
NM_063897	WBGene00010898	nphp-1	0.503441	0.170478	1.00191	0.474855	1.01318	1.66023	1.47748
NM_063901	WBGene00008433	marc-2	0.214233	0.135702	0.248313	0.325945	0.703099	0.354732	0.952063
NM_001267330	WBGene00206538	C09G5.13	0.16265	0.13737	0.113114	0.141408	0.266903	0.299244	0.344202
NM_001267331	WBGene00007490	mks-5	0.104473	0.107822	0.298581	0.202952	0.235419	0.12109	0.248741
NM_001267332	WBGene00007490	mks-5	0.218959	0.217737	0.112106	0.190265	0.335404	0.246776	0.121799
NR_051620	WBGene00007490	mks-5	8.13436e-10	1.31213	0.201466	1.82697e-16	0.362898	1.37007	1.45527
NM_063925	WBGene00011069	ceh-62	6.556	5.51928	9.19664	8.12952	14.0167	15.1391	15.2435
NM_001083162	WBGene00010912	gmps-1	0.000681286	0.000187962	0.000406971	0.000191398	0.00037053	0.000232373	0.000264983
NM_001027085	WBGene00010912	gmps-1	13.9282	17.5492	13.4061	14.4943	19.3378	25.8638	16.2979
NM_001027086	WBGene00010912	gmps-1	37.8348	40.5708	34.296	38.5946	31.9818	29.9202	20.3812
NM_063937	WBGene00010333	copz-1	352.187	301.76	331.957	320.71	741.923	693.287	887.308
NM_063939	WBGene00009700	lurp-1	2.99278	3.6498	3.52868	2.97203	6.24466	5.1264	4.14945
NM_063952	WBGene00010988	metr-1	173.601	210.622	156.688	166.275	24.1013	30.9376	16.2099
NM_001267337	WBGene00219205	R03D7.15	1.04621	1.65676	0.606321	2.84243	3.219	0	0
NR_101745	WBGene00219774	F33A8.12	0	0	0	0	0	0	0
NR_101746	WBGene00219775	F33A8.13	0	0	0	0	0	0	0.0629903
NR_101747	WBGene00219808	C09H10.19	138.539	122.339	100.182	131.092	90.2909	78.9986	54.2425
NM_001267345	WBGene00043120	C09H10.4	9.7397	1.14249	8.7804	2.35214	21.0881	19.9102	19.4663
NR_101748	WBGene00219809	C09H10.20	0	0	0	0	0	0	0
NM_063980	WBGene00007501	apc-17	30.4177	39.8937	33.167	38.7602	16.7684	18	10.1892
NR_101749	WBGene00219589	anr-35	1.18041	0.588398	0.931967	1.03373	2.95788	2.9184	2.07766
NM_182244	WBGene00011522	srap-1	1.96605e-05	0.000176937	9.0239e-05	0.000215466	0.000267819	0.000737923	0.00113059
NM_001267367	WBGene00011522	srap-1	1.77105	2.26172	3.2368	3.08525	8.74766	20.1766	9.37587
NM_063997	WBGene00011522	srap-1	2.28011	2.24545	3.3323	2.33318	9.8735	23.1779	11.8255
NM_064001	WBGene00011526	cox-15	64.3785	69.4772	65.6165	69.6523	64.0629	58.8927	49.2384
NM_064015	WBGene00011994	samp-1	83.905	94.9905	75.5332	84.5606	63.8019	63.3387	41.7152
NM_001027190	WBGene00011995	rsf-1	7.86863	7.4031	12.0381	7.37493	18.2642	19.0943	13.9259
NM_001027191	WBGene00011995	rsf-1	3.82469	2.73487	2.76256	4.76315	8.08994	8.16883	8.35436
NM_064046	WBGene00012204	mfn-1	55.3319	53.6929	57.7234	61.2035	125.163	127.427	149.739
NM_001267372	WBGene00195248	emc-5	170.844	177.638	161.363	166.966	95.1984	94.8944	67.6963
NM_001267373	WBGene00219293	B0334.20	0.838422	0	0	0	0	0	0
NR_101750	WBGene00220187	Y62F5A.16	0	0	0	0	0	0	0
NM_001276746	WBGene00219434	F54D5.23	6.05339	3.19534	0	0	0	0	0
NM_064078	WBGene00008546	gfat-1	149.437	190.387	158.793	190.607	55.6597	49.1869	41.2272
NM_064079	WBGene00008546	gfat-1	14.0152	16.3159	7.27855	6.11346	21.165	25.0868	61.3201
NR_131421	WBGene00255567	mir-8212	0	0	0	0	0	0	0
NR_101751	WBGene00219879	F07A11.15	0.0192266	0	0.308798	1.15647e-06	0	0.490153	0
NR_101752	WBGene00220236	ZK20.9	0	0	0	356.808	0	0	0
NR_101753	WBGene00220237	ZK20.10	0	0	0	0	0	8.70474	0
NM_064097	WBGene00008140	xpf-1	31.3991	33.8367	28.9408	31.027	36.7514	36.6229	24.3638
NM_064098	WBGene00012148	inos-1	138.338	125.795	138.571	134.007	234.925	299.117	308.331
NR_101754	WBGene00219949	F44E5.16	115.817	141.08	92.9358	145.228	931.984	458.942	961.519
NM_001267385	WBGene00206377	F44E5.15	0.613185	0.728269	0.577468	0.458137	0.157222	0.31729	0.162204
NM_001267386	WBGene00219294	F43G6.16	2.06177	0	0	0	0	0	1.09079
NM_171045	WBGene00009663	hda-5	4.02262	3.59503	4.30092	4.09747	12.5335	25.7686	32.2178
NR_101755	WBGene00219378	F43G6.17	1.25362e-05	1.6091e-05	1.20991e-05	1.55075e-05	1.63648e-05	1.0412e-05	1.54729e-05
NM_001276748	WBGene00219378	F43G6.17	1.34822	0.924502	0.943256	0.959342	3.69224	5.91287	7.38027
NM_064119	WBGene00005013	jmjd-1.1	0.0244647	0	0.0425348	0.0531742	0.0627279	0.0450104	0
NM_001267387	WBGene00003979	pes-5	17.317	14.6727	9.1837	12.0678	16.4103	8.57692	11.9568
NM_001267389	WBGene00003979	pes-5	15.7815	16.0804	16.6056	15.8577	17.1196	16.7298	10.372
NM_001267388	WBGene00003979	pes-5	11.6454	13.4465	7.36679	9.38667	10.8326	10.3376	9.15918
NR_131422	WBGene00255575	mir-8188	0	0	0	0	0	0	0
NR_131423	WBGene00235084	mir-5594	0	0	0	0	0	0	0
NR_101756	WBGene00219641	linc-47	0.791289	0.358019	0.786143	0.368544	0.579679	0.72791	0.47844
NR_101757	WBGene00220248	ZK930.15	0	0	0	0	0	0	0.412466
NM_001267394	WBGene00014151	vps-15	17.2535	13.8924	11.7897	13.5082	9.04375	10.2853	9.71487
NM_001267393	WBGene00014151	vps-15	25.4243	28.647	24.8924	28.0137	18.8569	24.6226	18.7006
NM_064156	WBGene00012460	dhps-1	33.5515	32.3807	30.085	31.6733	27.7703	23.4148	17.7301
NR_101758	WBGene00220134	Y17G7B.25	2.16438	0	0	1.17607	1.1099	0	1.14507
NR_101759	WBGene00219623	anr-2	69.074	57.3673	48.5691	37.3168	50.4573	52.9771	40.2559
NM_064192	WBGene00013259	trpp-5	59.1657	53.5774	57.1775	53.224	72.4841	63.3346	66.0371
NR_101760	WBGene00220184	Y57A10A.44	0	0	0	0	0	0	0
NR_051777	WBGene00219232	mir-5547	0	0	0	0	0	0	0
NM_064201	WBGene00013265	parn-2	31.1663	32.0696	28.1483	29.04	27.1221	28.0713	20.9496
NM_001267414	WBGene00206479	C44C11.6	0	0	6.94801	2.17149	0	5.51429	2.11425
NR_051786	WBGene00219222	mir-4806	0	0	0	0	0	0	0
NR_101761	WBGene00219567	linc-164	0	0	0	0.0248434	0.0117228	0.0210292	0.0120943
NM_064223	WBGene00013273	marc-5	2.74778	3.03902	4.29708	3.88674	5.99414	5.29611	7.15325
NM_064245	WBGene00012285	pitr-6	0.0700625	0.0147932	0.22993	0.0761406	0.0145329	0	0
NM_064259	WBGene00008842	chil-28	0.008163	0	0	0.0177938	0.0252133	1.33278e-07	0
NM_182152	WBGene00008842	chil-28	4.52252e-05	0	0	4.89072e-05	4.58837e-05	4.95282e-08	0
NM_001267415	WBGene00008842	chil-28	0	0	0	0	1.39077e-41	0.0251728	0
NM_001047345	WBGene00011878	ador-1	0.256336	0.164674	0.105521	0.147591	0.371313	0.00053281	0.000179083
NM_001047344	WBGene00011878	ador-1	0.00442703	0.00472345	0.103038	0.00498429	0.652913	0.732575	0.526851
NR_101762	WBGene00220075	T21B4.20	0	0	0	0	0	0	0
NM_001027181	WBGene00044032	ceh-99	5.53756	5.4505	4.92244	5.14317	6.07791	4.48121	3.80343
NR_101763	WBGene00220076	T21B4.21	0	0	0	0	0	0	0
NR_101764	WBGene00220143	Y38E10A.32	0	0	0	0	0	0	0
NM_064307	WBGene00012895	cox-10	4.39369	5.07042	5.23696	6.16672	6.87788	7.36355	6.06065
NM_064309	WBGene00012896	snrp-200	56.3245	67.8675	60.4679	66.6337	45.9342	53.2917	37.701
NM_064322	WBGene00012909	spds-1	21.3798	17.6952	17.1385	17.9718	9.63716	11.9808	8.49469
NM_001136357	WBGene00012909	spds-1	0.335132	0.522949	0.843216	0.749758	1.33047	1.26388	1.5884
NR_101765	WBGene00219555	Y46G5A.46	9.8878e-08	0	0.0502806	0	0.177953	0.127381	0
NM_064350	WBGene00010263	wago-4	25.9822	30.8167	24.7563	27.834	20.8964	18.4829	16.2987
NM_064386	WBGene00009246	gfm-1	38.6987	42.7681	42.5264	43.7746	59.3415	56.6109	44.8549
NR_051825	WBGene00219228	mir-4933	0	0	0	0	0	0	0
NM_001267451	WBGene00012990	sam-10	8.25487	5.01526	9.11679	7.24107	2.27639	0.936313	2.78481
NM_001267450	WBGene00012990	sam-10	46.8483	53.5719	48.0697	50.1981	25.8258	25.8787	16.6257
NM_064416	WBGene00012992	mrpl-20	91.5833	77.1556	75.0493	81.3085	58.9955	50.1232	51.9444
NM_064417	WBGene00012993	dmsr-3	1.52085	1.14398	1.0136	0.950354	0.779897	1.04928	0.643691
NR_101766	WBGene00220170	Y48C3A.25	0	0	0	0	0	0	0
NM_064423	WBGene00012996	pinn-4	225.851	211.771	209.157	196.106	213.651	212.225	178.569
NR_051836	WBGene00219226	mir-4929	0	0	0	0	0	0	0
NM_001267466	WBGene00010070	nep-17	30.2682	41.897	72.3218	75.6813	13.5742	31.7142	17.3273
NM_001267467	WBGene00010070	nep-17	17.0145	10.8752	21.3384	19.7362	3.10542	8.03777	2.96538
NR_101767	WBGene00219969	F54F11.6	12.7383	11.5269	16.8739	21.7539	20.5299	26.784	59.6905
NM_064443	WBGene00013011	snx-14	26.8984	28.2295	25.313	25.6306	10.4431	13.978	9.49356
NM_182150	WBGene00013011	snx-14	11.2728	12.0179	11.0235	13.0513	2.00729	4.07003	3.2053
NM_064449	WBGene00013004	mrpl-37	22.8625	22.8812	21.8811	22.5586	24.9144	27.6821	23.868
NR_131424	WBGene00255587	mir-2217.3	0	0	0	0	0	0	0
NM_001027280	WBGene00012999	rpoa-1	13.8774	13.179	14.4164	14.545	14.1061	14.2864	13.6752
NM_001027279	WBGene00012999	rpoa-1	7.06118	7.80709	8.4316	8.96049	7.49061	9.04814	5.13329
NR_101768	WBGene00219558	anr-12	0	0	0	2.80674e-06	0.744022	0	0
NR_051845	WBGene00206391	C01B9.7	0	0	0	0	0	0	0
NM_064509	WBGene00001838	hda-10	32.404	35.9124	31.7388	33.858	34.648	35.3132	31.2038
NR_131425	WBGene00235206	W07G1.24	4.00485	0	4.64194	0	0	0	0
NR_101769	WBGene00220125	W07G1.23	0	0	0	0	0	0	0
NM_001267485	WBGene00014569	bkip-1	0	0	0	0	0	0	0
NR_051890	WBGene00014569	bkip-1	0.662096	0.551257	0.543971	2.93585e-09	4.12605	2.55657	1.89851
NM_001267486	WBGene00014569	bkip-1	11.1836	4.86956	28.3584	8.43499	16.6371	11.5679	24.9103
NR_101770	WBGene00220169	Y48B6A.25	439.89	590.388	505.336	523.431	122.112	222.957	157.331
NM_064560	WBGene00012980	efhd-1	4.89436	6.32721	9.01109	9.8581	28.0762	22.3263	30.1482
NM_182166	WBGene00012980	efhd-1	2.88482	0.000156366	0.190066	3.31107	39.2118	22.3972	65.2186
NM_001129185	WBGene00012980	efhd-1	42.2488	42.2985	56.2515	66.2634	281.042	327.365	327.948
NR_101771	WBGene00219620	linc-74	0.36261	0.350912	0.350244	0.262711	0.712798	0.639335	0.607494
NM_001306612	WBGene00235256	Y54G11A.19	20.2271	11.9583	20.0062	12.896	18.8088	24.8092	19.4049
NR_131781	WBGene00195007	mir-5595	0	0	0	0	0	0	0
NM_001267502	WBGene00194892	dsb-2	46.7609	47.991	39.6136	44.7327	44.4616	34.6266	33.7871
NM_064603	WBGene00013222	dmsr-6	0.664266	0.758138	1.16531	1.2877	0.754927	1.35424	1.27276
NM_064606	WBGene00010758	vnut-1	42.7268	44.1332	50.5124	50.8493	17.6556	20.4869	14.5393
NM_064607	WBGene00010759	cysl-2	29.2446	32.4614	34.3515	37.5364	254.43	248.996	317.994
NR_131427	WBGene00235255	K10H10.15	0.484756	0.255883	0	0	0	0.222964	0
NM_064627	WBGene00007242	madf-5	4.76171	4.29645	5.00357	4.78087	2.65305	2.50087	1.72596
NR_101772	WBGene00219907	F19H8.7	0	0	0	0	0	0	0
NM_064656	WBGene00013187	npr-34	0.385446	0.49735	0.409533	0.477063	2.02051	1.46754	1.47277
NR_101773	WBGene00220108	W01D2.9	0	0	0	0	0	0	0
NM_064670	WBGene00012182	osta-3	56.4009	60.0742	51.3288	58.8155	52.2007	54.714	43.9565
NM_001306651	WBGene00012182	osta-3	0.00107266	0.00042914	8.13943e-05	0.000106895	5.75878e-05	0.000132892	0.000145888
NM_064676	WBGene00011043	rbm-28	33.1649	34.6477	31.8899	32.1901	43.6897	53.5912	39.3
NM_001306618	WBGene00011045	gpx-2	245.096	228.563	259.648	243.327	374.697	263.863	330.351
NM_064677	WBGene00011045	gpx-2	0.000875212	0.000397958	0.00105714	0.000640551	0.000455364	0.00041611	0.000506879
NM_001306625	WBGene00219491	Y53F4B.62	2.44382	1.8964	1.56155	1.64864	0	0	0
NM_001276759	WBGene00219491	Y53F4B.62	3.49024	2.77721	3.25584	3.06774	3.36107	2.72755	2.00507
NR_101774	WBGene00220162	Y46E12BM.1	0	0	0	0	0	0	0
NR_101775	WBGene00220161	Y46E12BL.11	268.909	238.604	232.415	240.746	145.479	157.345	111.156
NR_101776	WBGene00219753	linc-152	0.0181283	0.0191384	0.0105061	0	0	0.00833814	0
NM_064724	WBGene00019183	npr-30	0.277738	0.224221	0.32192	0.230813	0.20107	0.270521	0.103721
NR_101777	WBGene00220120	W05G11.7	0	0	0	0	0	0	0
NM_181905	WBGene00021043	pck-1	43.9561	38.6154	40.1326	34.7764	13.6231	7.47285	7.4953
NM_181904	WBGene00021043	pck-1	2.44805e-05	3.64428e-05	3.37757e-05	1.23733e-05	2.82435e-06	6.25556e-09	6.52351e-06
NM_064733	WBGene00021043	pck-1	30.7034	40.2027	42.0801	41.4283	25.3906	12.8189	15.4638
NM_181906	WBGene00021043	pck-1	3.41417e-07	0.35295	1.75324e-06	1.59289e-05	0.637061	5.45385e-05	4.64317e-05
NM_001267898	WBGene00018794	attf-3	0.340162	0.503546	0.730831	0.382611	0.206257	0.177258	0.14114
NM_001267899	WBGene00018794	attf-3	21.3631	22.2479	19.5493	20.5811	8.75673	8.83658	5.98887
NM_064737	WBGene00018793	mrpl-40	93.3728	93.3	90.3969	82.2007	87.0214	75.3938	83.7144
NR_101778	WBGene00219840	C29F9.15	0	0	0	0	0	27.7819	63.9117
NM_064774	WBGene00018240	cox-17	374.211	314.525	356.073	285.681	200.883	181.128	164.709
NM_064778	WBGene00021755	hpo-38	3.85144	4.1822	4.20903	3.52783	4.2322	3.54295	3.31841
NM_064779	WBGene00021754	hpo-29	33.1962	38.8045	35.4976	37.3402	28.583	28.6581	17.6353
NM_064781	WBGene00021752	xpd-1	35.187	41.1554	34.4481	37.8034	34.0132	31.7749	23.924
NM_064782	WBGene00021757	taco-1	57.5292	58.3623	52.1837	53.8113	34.7072	27.4443	18.6197
NR_101779	WBGene00219745	linc-90	0.0881144	0	0	0.0957585	0.271112	0.24317	1.30528
NR_101780	WBGene00220020	K10F12.9	0	0	0	0	0	0	0
NR_131433	WBGene00235190	K10F12.10	0	0	0	0	0	0	0
NM_064797	WBGene00021913	cec-8	22.7474	19.3489	30.8692	25.8101	45.9843	58.3506	35.8968
NM_064800	WBGene00021914	magu-1	10.8329	10.0903	9.96635	9.94199	10.1145	9.08281	7.26615
NM_001027741	WBGene00021905	helq-1	0.720651	0.112196	0.527457	0.209441	0.00128374	0.197381	0.244151
NM_001027740	WBGene00021905	helq-1	8.20084	9.84579	8.78847	9.72847	8.015	8.95255	5.8844
NM_064817	WBGene00020559	best-17	1.1603	1.22495	1.23541	0.806425	1.35605	1.84926	1.08496
NR_101781	WBGene00220072	T19C3.11	0	0	0	0	0	0	0
NM_001026010	WBGene00016029	elf-1	3.99917	4.38734	3.44512	4.22257	2.13846	2.10021	1.0404
NM_001026009	WBGene00016029	elf-1	0.332927	0.151512	0.339981	0.286341	0.117386	9.34663e-05	1.02263e-05
NR_101782	WBGene00219828	C24A1.8	0	0	0	0	0	0	0
NM_171074	WBGene00018364	dagl-2	5.8336e-05	6.90181e-05	0.000244565	0.000110007	2.14476	6.45014	4.7835
NM_001027404	WBGene00018364	dagl-2	17.289	15.408	16.023	16.4228	11.3513	9.2674	6.1079
NM_171860	WBGene00018364	dagl-2	35.9713	41.6219	35.1182	40.332	26.5573	25.0662	19.4837
NM_064863	WBGene00015173	trpp-11	32.3296	35.5894	30.5436	34.2633	37.2547	39.4169	37.8789
NR_101783	WBGene00219709	linc-37	5.70271	3.21091	4.18626	4.13162	8.57814	13.6394	12.4704
NR_101784	WBGene00220001	K02F3.15	9.69094	0	0	3.51055	1.65651	4.45737	1.70901
NM_064887	WBGene00017759	sucl-2	201.856	198.908	178.237	186.59	179.349	147.002	152.235
NR_101785	WBGene00220140	Y34F4.7	0	0	0	0	0	0	0
NR_101786	WBGene00220215	Y92C3B.4	3.23303	3.41317	1.49894	2.45946	1.98949	0.594816	1.02627
NM_064946	WBGene00022493	mrpl-45	41.2312	38.8846	37.5461	37.4282	38.1914	28.2321	25.2454
NM_064948	WBGene00022488	orc-3	54.1694	59.8488	52.8775	54.3108	33.6859	31.9607	30.2703
NR_101787	WBGene00219772	anr-53	6.82934e-09	1.54941e-08	0.0202719	1.88418e-08	0.0369686	0.0575609	0.00977191
NR_101788	WBGene00219770	linc-40	0.969655	0.544512	1.84129	1.12104	0.148115	0.303656	0.261958
NR_101789	WBGene00219771	linc-24	3.135	3.18932	4.75686	4.08836	4.09216	2.72659	3.67904
NR_101790	WBGene00220193	Y67D2.11	0	0	0	0	0	0	0
NM_065036	WBGene00021252	cht-4	0.742257	0.296503	1.06961	0.370623	0.678965	0.719713	0.955203
NM_065058	WBGene00006513	rimb-1	1.65835	1.66547	2.00477	1.78156	7.32714	9.63832	7.03897
NR_101791	WBGene00220145	Y39A3CR.11	0	0	0	0	0	0	0
NR_101792	WBGene00219790	B0524.10	1.52494	0	0	0	1.56399	0	0
NM_065083	WBGene00020116	moa-1	0.0597749	0.0578466	0.161662	0.086614	0.163481	0.187873	0.0527069
NM_001267922	WBGene00206512	Y39A3B.7	0	0.799647	0.12542	0.823154	0.443908	0.597236	0.457976
NM_001267928	WBGene00206486	Y54F10BM.20	0.0755821	0.0265978	0.0584037	0.0547593	0.0258391	0.139056	0.053316
NM_065149	WBGene00021021	mrpl-30	47.3155	43.0235	43.8846	47.1311	38.3604	35.5045	28.2132
NR_101793	WBGene00219669	anr-28	1.72307e-05	1.78697e-05	1.66549e-05	0.324505	0.51069	2.45336e-05	0.645529
NR_101794	WBGene00219669	anr-28	0.713635	0.430504	1.41801	0.281736	0.756496	1.50053	1.28766
NM_065157	WBGene00017103	klo-2	2.08203	1.80391	3.66147	3.19892	0.382889	0.515141	0.258285
NR_101795	WBGene00220200	Y71H2B.12	0	0	0	0	0	0	0
NM_065206	WBGene00022172	cosa-1	27.9049	30.1162	25.7635	28.2001	9.87585	6.31133	4.50007
NM_065212	WBGene00022182	swsn-3	69.8639	67.9808	67.1628	65.8267	60.5754	52.8045	37.674
NR_101796	WBGene00220199	Y71H2AM.28	0	0	0	0	0	0	0
NM_001038294	WBGene00044609	tbcc-1	29.5482	28.8478	28.4007	27.1985	45.4189	42.7138	43.8454
NM_181956	WBGene00022190	josd-1	20.1035	17.8159	21.5293	20.7398	25.6712	23.6505	21.6312
NR_101797	WBGene00219718	linc-42	0.905873	0.409863	0.299994	0.421911	0.132724	0.47618	0.410791
NR_101798	WBGene00219761	linc-143	0.0389726	0	0.0225862	0.0211768	0.0199853	0.00896277	0.0103093
NR_101799	WBGene00219989	H06I04.14	208.596	244.06	245.002	242.834	745.739	783.923	1205.17
NR_101800	WBGene00219660	linc-19	0.348732	0.331347	0.282946	0.303189	0.536493	0.802	0.516595
NR_101801	WBGene00219661	linc-45	0.783264	0.751733	0.907865	0.696448	2.19087	2.22709	1.05481
NR_052166	WBGene00219264	mir-4936	0	0	0	0	0	0	0
NM_065290	WBGene00021810	phf-15	18.8935	18.9266	17.4164	18.7314	24.1723	22.5937	19.1955
NM_181910	WBGene00021810	phf-15	0.0024426	0.000784175	0.000213308	0.000715931	0.000778268	0.0005513	0.000794816
NM_065296	WBGene00009738	hecw-1	0.621722	0.496088	0.486003	0.628519	0.607984	0.678329	0.504861
NR_101802	WBGene00219986	F59A2.7	0	0	0	0	0	0	0
NM_001267945	WBGene00219295	C34C12.12	10.6131	3.73481	8.20094	0	7.25656	3.25434	7.48653
NM_065315	WBGene00007924	rsu-1	92.4982	82.0388	84.3457	80.6482	107.411	86.5228	76.407
NR_052183	WBGene00219225	mir-4927	0	0	0	0	0	0	0
NM_065323	WBGene00010812	mrpl-35	60.8227	55.3186	54.6612	52.9082	63.1284	47.6529	62.0411
NM_065325	WBGene00010813	pitp-1	4.34685	3.65342	4.40244	3.57736	2.31874	3.24997	2.44325
NM_001267946	WBGene00219296	C54C6.11	1.39962	0.591043	0.324455	1.21683	2.00965	1.28752	0.592381
NM_065335	WBGene00007859	mrps-31	15.6671	15.5198	15.7468	14.5218	15.0009	12.5658	11.2483
NR_101803	WBGene00219563	linc-95	0.294143	0.282302	0.371929	0.34872	0.027425	0.221386	0.0282941
NM_171100	WBGene00007860	rilp-1	54.9422	49.6648	46.1111	51.1433	36.1713	30.6335	18.2503
NM_171101	WBGene00007860	rilp-1	4.94406	9.77426	6.16454	5.66436	11.6899	16.0018	11.794
NM_065338	WBGene00008118	madf-8	26.8769	24.8276	20.2078	22.7638	16.9932	12.3621	8.9948
NR_101804	WBGene00219568	anr-9	14.2901	14.0491	10.3223	7.3228	13.1191	24.5705	25.4076
NR_101805	WBGene00219570	linc-82	0.222683	0.0391818	0.0286786	0.0537781	0.0507523	0.0227608	0.0523607
NR_101806	WBGene00219569	linc-147	0.00878542	0.00927493	0	0	0.0360415	0.032327	0
NM_065348	WBGene00006474	wdr-5.1	147.047	146.35	133.024	140.962	172.962	149.05	114.255
NM_065350	WBGene00007581	alkb-8	29.9055	31.5245	30.3834	32.1351	38.0378	37.9975	33.3361
NM_065351	WBGene00007577	nrde-1	25.2108	25.5356	22.7049	25.5947	40.0815	40.8408	30.2468
NM_065361	WBGene00008092	gmeb-3	0.0570319	0.0401398	0.0440697	0.0826395	0.0779897	0.0699518	0.0402307
NR_101807	WBGene00220044	R13G10.5	0	0	0	0	0	0	0
NR_101808	WBGene00219936	F37A8.7	0	3.73481	0	0	0	3.25434	3.74327
NR_101809	WBGene00219850	C36E8.11	0	0	0	0	0	0	0
NM_065406	WBGene00011367	snpc-3.4	40.5804	39.436	35.6838	36.2906	28.8148	23.0161	19.3294
NM_065407	WBGene00011368	tftc-5	55.7248	51.2011	48.99	50.5124	50.4309	46.3092	31.3294
NR_101810	WBGene00219843	C30D11.6	0	0	0	0	0	0	0
NM_001267959	WBGene00219299	C01G12.16	0	0	0	0	0	0	0
NM_065433	WBGene00007624	hrde-1	150.37	165.058	131.143	145.309	97.1867	88.9432	71.6666
NM_001267960	WBGene00206525	R74.10	12.2733	8.07476	13.1949	8.89205	32.1075	34.3617	46.8644
NR_101811	WBGene00220047	R74.11	0	0	0	0	0	0	0
NM_001027414	WBGene00023422	mrpl-21	119.323	103.838	106.172	104.882	121.075	105.462	87.8174
NM_065449	WBGene00009648	zhit-2	53.4568	51.0108	47.9307	45.3157	82.3397	58.8101	65.3455
NM_001267985	WBGene00007135	cdk-12	22.0834	24.9125	20.642	22.7702	14.5292	13.9447	10.1765
NM_001267986	WBGene00007135	cdk-12	13.3809	16.6196	14.1613	13.5769	15.6592	16.3225	10.7456
NM_001267987	WBGene00007135	cdk-12	3.55336	2.52864	2.81723	4.02087	2.21013	2.34	2.01421
NR_101812	WBGene00219783	B0285.17	0	0	0	0	0	0	0
NR_131685_17	WBGene00235179	F32D1.12	0	0	0	0	0	0	0
NR_131676_16	WBGene00235188	K09C6.12	0	0	0	0	0	0	0
NR_131685_16	WBGene00235179	F32D1.12	0	0	0	0	0	0	0
NM_065508	WBGene00004132	ifet-1	243.568	303.436	251.874	290.772	91.8069	89.5533	65.2805
NM_065518	WBGene00010905	mrps-34	60.3478	53.6692	52.1298	54.4857	33.0071	24.2133	19.8546
NM_001276771	WBGene00010908	zbp-1	35.3863	46.3536	38.5068	45.664	30.8409	41.3197	24.6374
NM_001027524	WBGene00010908	zbp-1	5.66292	10.4445	6.12722	5.54908	1.08035	1.87864	1.38875
NM_001276772	WBGene00010908	zbp-1	7.38694	3.95409	3.06691	4.53284	4.99189	2.2241	2.49295
NM_001027525	WBGene00010908	zbp-1	0.713521	0.554467	0.274347	0.298453	0.0748554	0.0428787	0.0647715
NM_065526	WBGene00009440	idhg-1	136.052	137.831	138.068	141.223	171.871	148.002	134.858
NR_052263	WBGene00195008	mir-4813	0	0	0	0	0	0	0
NM_001136365	WBGene00009441	wdr-48	0.000183575	0.00019166	0.000210391	0.463097	0.000189377	0.782692	0.000195088
NM_065529	WBGene00009441	wdr-48	22.6354	20.1507	15.8462	19.4249	6.22829	5.91899	4.48457
NM_065530	WBGene00009441	wdr-48	12.8239	15.7266	16.1479	14.5227	20.5365	15.0853	10.6996
NM_065542	WBGene00008656	lron-5	2.30557	2.18894	1.01189	0.902629	0.609165	0.500096	0.543281
NM_065548	WBGene00011953	ppm-2	154.945	158.907	159.77	169.757	90.6804	116.767	73.8597
NR_101813	WBGene00220088	T23F11.12	0	0	0	0	36.3866	16.3182	0
NM_001267990	WBGene00219297	T23F11.11	0.333546	0.201218	0.220918	0.0517832	0.244348	1.09582	0.453765
NM_065557	WBGene00011407	ppat-1	2.92181	2.62042	4.07709	3.97682	0.930991	1.50046	0.60031
NM_065564	WBGene00011412	mrpl-16	65.0527	62.0953	57.1763	58.1876	42.8277	33.1196	27.7289
NR_101814	WBGene00219898	F17C8.13	0	0	0	0	0	0	0
NM_065584	WBGene00008003	enu-3.2	15.215	16.8449	12.9036	14.7853	13.2541	13.2664	10.5013
NM_065585	WBGene00008003	enu-3.2	2.74371	5.03102	2.78779	2.96942	1.5547	1.19149	3.88768
NM_065616	WBGene00016440	gipc-1	0.668943	0.535012	3.14842	1.80643	1.74637	1.39855	0.900855
NM_065644	WBGene00016142	mrps-18C	63.319	63.6199	57.9643	60.7445	80.0066	70.9574	58.9956
NM_065647	WBGene00016139	ntl-9	69.6887	77.9527	72.3641	78.5562	65.743	63.9576	39.6411
NR_101815	WBGene00220050	R144.18	760.926	750.627	701.979	777.515	452.774	582.635	335.672
NR_101816	WBGene00219720	linc-2	13.1312	0	0	0	0	12.0794	13.8942
NM_001276775	WBGene00220249	R144.19	0	0	0	0	0	0	0
NR_131685_15	WBGene00235179	F32D1.12	0	0	0	0	0	0	0
NM_001306714	WBGene00020423	prp-19	192.408	212.133	187.734	204.098	187.654	167.566	125.539
NR_101817	WBGene00220017	K10D2.10	1.52494	1.60991	0	1.65724	3.12798	1.4028	1.61356
NM_181964	WBGene00022533	cutl-19	0.209226	0.294499	0.000508714	0.303187	0.286125	0.352869	0.516414
NM_065706	WBGene00022533	cutl-19	1.34504e-05	3.21778e-05	0.207833	1.59461e-06	4.51977e-06	1.11389e-05	0.000187303
NM_065712	WBGene00016412	mrps-26	106.251	96.7545	97.5453	92.7924	67.9138	56.4558	46.2889
NM_001026029	WBGene00006946	prx-10	20.9398	19.7146	19.7374	22.8341	16.1437	13.7412	8.9333
NM_001026030	WBGene00006946	prx-10	35.9694	31.4293	33.6461	34.4679	24.9571	21.7206	14.3493
NM_065715	WBGene00016409	sumv-1	36.3457	39.9273	32.4007	36.119	21.5936	22.1421	14.0268
NR_101818	WBGene00220233	ZC395.12	19.2529	0	0	41.8463	118.475	194.819	346.319
NR_101819	WBGene00220116	W03A5.8	0	0	0	0	0	0	0
NM_065759	WBGene00018612	disl-2	18.9989	20.2862	19.5186	19.8189	14.9952	16.3913	12.8143
NM_065791	WBGene00017300	rpc-2	48.4175	49.9663	48.5509	47.1819	35.2484	36.8507	24.6993
NM_065794	WBGene00017299	molo-1	0.944467	0.727606	1.47934	1.47025	4.34584	2.1603	4.40254
NM_171130	WBGene00018967	ddx-15	101.054	110.95	101.196	106.742	86.6024	83.6955	75.7858
NM_171131	WBGene00018967	ddx-15	4.72701e-05	0.000141824	9.02725e-05	0.00011416	9.85004e-05	0.000206962	7.51721e-05
NM_001038259	WBGene00015468	madf-11	35.5768	35.4089	32.7484	33.765	19.2776	17.7163	13.1609
NM_001038258	WBGene00015468	madf-11	0.00454647	0.00288325	0.0115929	0.00390262	0.00720435	0.00172134	0.00166694
NM_065809	WBGene00015467	basl-1	0.0264914	0.0279675	0.0767642	0.0719741	0.108679	0.170587	0.0700771
NM_065819	WBGene00018830	ska-3	85.2369	78.7819	74.2993	76.4844	76.908	55.5088	52.6509
NM_065831	WBGene00015148	hpo-28	1.99727	1.7576	2.70193	2.17798	3.94738	4.3477	3.63926
NM_181917	WBGene00015148	hpo-28	0.0929525	0.0806346	0.0571898	0.237254	0.145689	2.7126e-07	8.89583e-07
NM_001267999	WBGene00206513	B0244.15	0.0593421	0.0313243	0.137564	0.0806128	0.228231	0.409418	0.204069
NR_052333	WBGene00219266	mir-4938	0	0	0	0	0	0	0
NR_101820	WBGene00220119	W04D12.2	0	0	0	0	0	0	0
NM_065864	WBGene00017163	dnpp-1	56.8601	62.6682	67.2029	73.3109	83.2469	86.8643	93.223
NM_181896	WBGene00017158	hpo-10	0	0	0	0	0	0	0
NM_065873	WBGene00017158	hpo-10	0.00301455	0.0033602	0.00364097	0.00340356	0.00319003	0.00302471	0.00370142
NM_065874	WBGene00017158	hpo-10	30.694	29.1687	29.1332	28.2116	25.2146	24.4702	21.9662
NM_065880	WBGene00016200	dpff-1	55.7132	54.7637	52.7193	52.637	61.641	49.9272	38.4737
NM_181909	WBGene00016200	dpff-1	36.4361	43.2597	38.2381	39.7933	53.0692	60.1903	47.3971
NM_001129206	WBGene00016200	dpff-1	0.469507	0.266675	0.767802	0.512826	0.826563	5.64521e-06	0.605547
NR_131436	WBGene00219838	C28H8.14	584.329	500.248	914.19	737.078	264.393	788.221	364.995
NR_131437	WBGene00219838	C28H8.14	4.9334e-05	0.000125945	2.75603e-05	0.000156269	0.000266501	2.45419e-05	2.93209e-05
NM_001047382	WBGene00016201	tdo-2	27.1891	21.0457	17.5442	10.4179	12.9875	11.311	11.4124
NM_065883	WBGene00016201	tdo-2	27.3251	32.4235	21.2288	21.8705	19.2584	29.6507	30.3926
NM_181916	WBGene00016201	tdo-2	0.00163737	2.40952	0.000541044	0.02012	1.9256	2.07523	1.42945
NM_065886	WBGene00016192	bcl-1	258.551	207.558	232.957	215.998	321.926	219.318	260.563
NM_065895	WBGene00017778	nono-1	42.6212	39.1926	30.91	31.3434	12.3545	14.2902	14.9289
NM_065894	WBGene00017778	nono-1	63.3094	69.8051	76.5306	82.6688	53.8513	59.5373	44.2689
NM_065896	WBGene00017778	nono-1	31.0943	32.0525	26.226	29.6834	22.5024	22.059	13.6816
NM_181937	WBGene00017778	nono-1	6.65073	7.60528	0.00371692	0.00481728	2.48834	0.078412	0.060528
NR_101822	WBGene00220057	T04C9.13	0	0	0	0	0	0	0
NR_101823	WBGene00220242	ZK328.11	143.347	164.298	157.416	173.896	105.341	135.025	109.198
NR_101824	WBGene00219942	F40H6.8	0	0	0	0	0	0	35.907
NM_171147	WBGene00015477	attf-4	21.0574	18.4689	21.8759	21.4901	26.1147	26.1384	20.8698
NM_171148	WBGene00015477	attf-4	1.22655e-23	6.78564e-07	1.72641e-18	6.39206e-07	1.22036e-09	1.43184e-09	8.5053e-12
NM_001025973	WBGene00015477	attf-4	0.0112774	0.000489678	0.00261806	0.000253566	9.32428e-05	0.000155415	0.000562758
NM_065933	WBGene00018340	anmt-2	28.4497	24.4014	42.0049	36.9029	1.34624	2.17873	1.3889
NR_101825	WBGene00219827	C23G10.12	0	0	0	0	0	0	0.970237
NR_131438	WBGene00255564	mir-8206	0	0	0	0	0	0	0
NM_065961	WBGene00020437	stt-3	204.669	225.792	202.824	213.662	200.755	217.503	179.318
NM_065977	WBGene00018561	gadr-3	3.00649	2.50276	3.88482	2.67505	7.1544	7.43641	5.3148
NM_171163	WBGene00016977	akap-1	61.7161	77.1923	68.5622	78.4182	60.6139	74.9722	50.8196
NM_171164	WBGene00016977	akap-1	33.6999	30.6722	32.6318	33.3387	48.828	77.1707	37.0771
NR_101826	WBGene00219864	C56G2.20	0	0	0	110.605	0	0	0
NR_101827	WBGene00219865	C56G2.21	0	0	0	2.24209	2.11594	0	0
NM_065993	WBGene00007048	nfx-1	70.6266	72.1929	60.1056	66.4279	56.2582	61.2288	36.4801
NM_171167	WBGene00015484	atgl-1	55.3834	56.9576	52.7205	56.6667	45.6375	52.662	38.7019
NM_171168	WBGene00015484	atgl-1	11.1167	17.3799	16.1399	14.6612	9.27915	8.81281	8.03019
NM_066008	WBGene00015487	mrps-17	111.667	93.9276	97.0354	95.7021	179.571	145.554	230.41
NR_101828	WBGene00219738	anr-1	220.497	192.407	198.191	191.419	232.832	226.851	203.692
NM_066018	WBGene00020821	jhdm-1	0.201569	4.78017e-05	1.955e-05	1.26433e-05	6.51506	5.30327	9.72699
NM_066017	WBGene00020821	jhdm-1	44.2239	46.2304	40.9602	42.1587	28.968	24.8166	12.7028
NM_181936	WBGene00017755	zip-8	63.412	30.5163	117.147	61.2921	80.9116	107.466	62.893
NM_066025	WBGene00017755	zip-8	21.0892	11.0487	37.4586	20.6421	28.3048	36.0026	18.8249
NM_066062	WBGene00015734	copd-1	93.6639	103.918	94.009	99.7731	103.339	111.284	100.462
NM_066087	WBGene00020066	dhhc-5	0.133868	0.141327	0.116372	0.181851	0.171619	0.092359	0.141647
NM_066114	WBGene00004133	abu-13	0.368436	0.388965	1.82057	0.611136	0.437534	0.374602	0.307773
NM_066118	WBGene00017951	panl-2	34.492	36.4832	33.1729	35.127	33.8359	33.5382	22.0763
NM_001268014	WBGene00219317	F31E3.12	0.100783	0.319194	0.467261	0.328578	0.723543	0	0.106639
NR_052422	WBGene00219220	mir-5549	0	0	0	0	0	0	0
NM_001276778	WBGene00220259	ZK418.13	1.42269	1.52199	1.62703	1.46366	14.7728	17.0195	18.2986
NM_066146	WBGene00022737	tofu-7	32.586	28.7562	26.0515	29.1173	18.2812	15.0392	11.3753
NR_131440	WBGene00235162	B0361.13	0	0	0	0	0	0	0
NM_066225	WBGene00017268	hmgr-1	43.7655	41.2038	39.8745	40.243	30.1767	25.384	17.4186
NR_101829	WBGene00220074	T20B12.12	0	0	0	0	0	0	0
NR_101830	WBGene00219765	linc-165	0	0	0	0.00769685	0	0	0
NM_001307726_3	WBGene00235260	T05C7.7	0	0	0	0	0	0	0
NR_101831	WBGene00219807	C07H6.19	0	0	0	0	0	0	0
NR_101832	WBGene00219719	linc-57	0	0	0	0	0	0.0810567	0
NM_001268018	WBGene00206459	Y80D4G.1	3.80999	3.20525	3.72607	4.3346	2.56433	3.01196	2.14167
NR_101833	WBGene00219726	linc-116	0.258105	0.247715	0.271968	0.152998	0.577559	0.906559	0.595862
NM_066291	WBGene00022794	snu-23	145.249	128.154	124.44	122.748	159.251	136.932	139.054
NM_001047381	WBGene00015591	cyk-7	124.157	120.775	104.859	118.726	131.326	126.103	97.9727
NM_001047380	WBGene00015591	cyk-7	32.0679	40.1802	31.4961	34.0551	28.7855	29.4423	32.3182
NM_066304	WBGene00044324	ufm-1	468.144	429.639	458.834	450.642	588.893	505.896	532.511
NR_002381	WBGene00023453	mir-356.1	73.0564	0	0	0	74.9271	0	0
NR_052479	WBGene00195236	mir-356.2	0	0	0	0	0	0	0
NM_066308	WBGene00015333	slc-17.3	1.48178	1.07589	1.58705	1.45405	0.743828	0.552138	0.357238
NM_066314	WBGene00022798	fahd-1	46.5282	42.7991	44.9728	41.4191	91.9121	82.8488	120.383
NM_066316	WBGene00022797	best-24	7.57225	6.62904	11.1749	12.7597	10.8853	15.5207	9.50088
NM_066359	WBGene00000448	pros-1	1.57554	1.10108	3.0865	1.77252	1.26312	2.23016	1.77276
NM_066364	WBGene00019457	vms-1	49.7778	43.6024	40.2596	40.2147	45.0898	40.7257	36.1014
NR_101834	WBGene00219815	C14B9.15	0	0	0	0	0	0	0
NM_066377	WBGene00017044	mrpl-18	131.605	117.69	116.569	112.465	235.129	179.61	215.545
NM_001276792	WBGene00220258	C50C3.19	0.205232	0.0722225	0.396468	0.148691	0	0.0629313	0.36193
NM_001268027	WBGene00206533	C30A5.16	0	2.86046	0	0	2.77887	4.98494	0
NR_101835	WBGene00219795	C02F5.15	7.76164	5.46274	7.49697	8.43499	5.30692	5.94997	2.73755
NM_171213	WBGene00015349	henn-1	0.415745	0.000157278	0.000107028	0.000208938	0.000104127	0.454859	0.000104754
NM_171212	WBGene00015349	henn-1	46.8863	44.1577	42.9376	44.175	63.6646	57.9314	48.4115
NM_066414	WBGene00017319	mrps-9	23.2675	23.4768	21.6086	23.0087	18.5088	15.2884	13.2655
NM_066432	WBGene00022580	iglr-2	10.6406	10.5608	9.74064	9.3464	8.04026	8.29123	5.34283
NM_066433	WBGene00022580	iglr-2	55.499	56.7556	52.3301	52.7244	41.833	41.3867	28.4767
NM_066434	WBGene00022583	mrps-18A	92.7245	81.4941	84.5088	81.1981	120.501	104.664	115.966
NM_001306706_1	WBGene00206477	ZC262.12	0	0.0274814	0	0	0	0	0
NM_001306706	WBGene00206477	ZC262.12	0	0.0274814	0	0	0	0	0
NM_001268031	WBGene00022865	ufbp-1	72.9367	68.6033	70.7945	72.8964	127.144	117.58	98.7145
NM_001268030	WBGene00022865	ufbp-1	11.7625	9.59019	8.26266	6.37408	15.8613	12.8687	14.0095
NM_066467	WBGene00016250	hsp-110	147.493	197.703	147.786	174.346	158.22	157.099	126.566
NR_101837	WBGene00219841	C30C11.14	0	0	0	0	0	0	0
NM_066469	WBGene00016249	mrpl-32	89.061	77.245	75.8964	72.9549	143.363	109.743	151.182
NR_101838	WBGene00219842	C30C11.15	0	0	0	0	0	0	0
NR_101839	WBGene00219946	F42H10.17	1.28184	1.11286	0.000261522	4.90158	0.629311	0.000781154	5.75511e-06
NM_066485	WBGene00015519	doxa-1	1.92113	1.35211	1.56697	1.06323	0.401362	0.441813	0.188219
NM_066513	WBGene00015124	anmt-1	3.26908	2.39164	2.79199	3.05406	5.3527	5.24948	5.34028
NM_066522	WBGene00015133	mrpl-11	121.33	105.766	107.122	100.083	95.6312	80.0487	67.6934
NM_001268036	WBGene00219329	K02D10.8	6.53075	4.30914	7.56965	5.76656	17.1636	17.272	32.8236
NR_101840	WBGene00219701	anr-34	0.162635	0.0709244	0.222261	0.250341	0.1183	0.186574	0.0731803
NR_101841	WBGene00219968	F54F2.13	0	0	0	0	6.14792	3.67619	4.2285
NR_101842	WBGene00219948	F44E2.12	0	0	0	0	0	0	0
NM_001268038	WBGene00004041	F44E2.11	4.05371	2.541	2.34929	3.16637	1.42914	0.815724	0.670198
NM_066559	WBGene00014021	svop-1	2.65287	2.22688	3.44987	3.10803	6.43701	8.59491	6.35346
NM_066577	WBGene00014035	seb-2	3.93751e-06	5.89999e-06	7.19321e-06	5.15379e-06	9.82029e-06	8.12248e-06	4.7464e-06
NM_001129277	WBGene00014035	seb-2	3.15178	3.05576	3.78735	3.73277	7.04549	9.17135	7.71797
NM_066588	WBGene00010307	skat-1	59.9003	65.9455	58.9379	64.5215	37.4997	36.4743	20.9061
NM_066628	WBGene00010074	irld-34	0.106729	0	0.20618	0.0773256	0.0547311	0.212725	0.169397
NM_066637	WBGene00013848	npr-29	0.66222	0.415691	0.8298	0.680768	0.477259	0.477464	0.435571
NM_066641	WBGene00011964	saeg-2	5.9187	5.49029	6.63061	6.88968	12.1405	13.0534	12.0143
NM_001027512	WBGene00010796	clip-1	9.07179	7.29144	7.52113	7.37515	11.0751	12.6373	12.2101
NM_001027511	WBGene00010796	clip-1	1.05214	1.19311	2.15239	1.21014	2.84352	3.06837	4.02696
NM_066654	WBGene00008041	ufc-1	65.2706	57.4562	65.7283	62.523	117.23	104.389	172.088
NM_066664	WBGene00008000	slc-17.2	226.197	227.683	208.976	225.054	337.606	303.153	252.883
NM_001268057_1	WBGene00206422	T26G10.9	0	0	0.198064	0	0	0.314387	0
NM_001268057	WBGene00206422	T26G10.9	0	0	0.198064	0	0	0.314387	0
NR_131685_14	WBGene00235179	F32D1.12	0	0	0	0	0	0	0
NR_131685_13	WBGene00235179	F32D1.12	0	0	0	0	0	0	0
NM_001268070	WBGene00007184	ctr-9	5.65773	4.52196	3.38136	2.98927	5.63191	3.18268	5.95966
NM_001268069	WBGene00007184	ctr-9	4.95762	5.33306	5.54194	4.93281	4.82766	6.15628	5.31529
NM_001268072	WBGene00007184	ctr-9	18.9218	14.7204	17.9432	17.7635	34.8897	31.4875	31.2412
NM_001268071	WBGene00007184	ctr-9	49.1737	52.889	46.7629	50.0154	51.5021	54.2701	35.5828
NM_001268075	WBGene00219298	F55H2.8	19.9814	16.8758	20.844	23.8863	36.8875	71.6858	44.3993
NM_066698	WBGene00014224	mrps-23	131.481	114.905	118.841	110.014	96.7818	72.7233	114.38
NM_066699	WBGene00014222	trpp-3	86.6266	79.0303	78.6086	75.4732	77.6382	64.0791	74.8736
NM_001268085	WBGene00043992	bbs-4	0.20969	0.105308	0.00063983	0.0428767	3.34511	1.43603	1.61167
NM_001268084	WBGene00043992	bbs-4	0.405784	0.405433	0.893777	0.634791	0.859487	0.854586	0.316823
NM_066731	WBGene00010230	rpac-19	98.7626	71.6772	86.3814	69.9235	145.743	114.019	166.066
NM_066741	WBGene00007404	best-5	1.56401	1.33054	2.92161	2.55778	1.55733	2.30477	1.46209
NR_101844	WBGene00220040	R10E11.13	0	0	0	0	0	0	0
NR_101845	WBGene00220244	ZK632.18	0	0	0	0	0	0	0
NM_066776	WBGene00014015	panl-3	65.1296	71.2813	69.7951	70.2177	37.1756	40.938	22.8875
NM_001027509	WBGene00010783	mrpl-36	415.846	351.782	351.349	335.769	290.164	210.272	257.069
NM_001027510	WBGene00010784	twk-48	0.577884	0.305041	0.446542	0.418678	0.869265	1.08091	0.774521
NM_001129279	WBGene00014075	dhhc-4	27.3739	25.7275	26.0454	24.4876	31.1774	29.0475	27.461
NM_001268110	WBGene00014075	dhhc-4	42.1839	40.5644	50.7898	45.8354	43.7281	37.8477	41.128
NM_001268109	WBGene00014075	dhhc-4	0.0697285	8.82176	0.00623024	1.18186	2.70011	7.28992	10.7451
NM_001268112	WBGene00014075	dhhc-4	14.8712	3.61029	9.38636	8.1347	18.8731	10.3753	4.09122
NM_001027862	WBGene00014075	dhhc-4	8.70421e-103	0.223862	0.258411	2.38602e-58	0.490911	1.13293	0.712111
NM_001268111	WBGene00014075	dhhc-4	24.1297	22.4815	22.1413	21.7565	22.9939	17.6959	14.8981
NM_001027861	WBGene00014075	dhhc-4	2.19804e-67	3.05167e-24	9.31163e-34	5.05613e-35	2.41249e-37	4.88902e-11	1.22511e-28
NM_001268115	WBGene00206488	ZK757.10	0.208506	0.146749	0.48335	0.226595	0.42769	0.767222	0.514785
NM_066791	WBGene00006449	alg-4	0.0278854	0.0221903	0.207723	0.0707826	0.165854	0.204112	0.0444358
NM_066790	WBGene00006449	alg-4	0.00815052	0.00950567	0.00820689	0.00757326	0.00671983	0.00596466	0.0444586
NM_066792	WBGene00006449	alg-4	0	0	0	0	0	0	0
NM_066793	WBGene00009593	mam-7	0.202133	0.125527	0.151599	0.0904519	0.536565	0.382824	0.478083
NM_066800	WBGene00010545	cbp-2	25.1	20.5747	35.2487	30.7154	5.07986	9.63304	3.31065
NM_001268125	WBGene00219314	C05B5.17	0	0.0526056	0	0	0.255526	0	0
NM_001268126	WBGene00219280	C05B5.16	0	0.0379555	0.166686	0.117214	1.10619	0.297654	1.40753
NM_001027590	WBGene00011819	hal-2	44.0376	40.3217	36.1071	37.9196	31.4476	24.99	22.0176
NM_066861	WBGene00011872	blos-1	104.33	95.4987	95.4318	89.7999	130.169	92.3274	99.1746
NM_001268138	WBGene00011868	best-18	2.94782	2.76051	3.89346	2.85709	4.91745	4.89881	5.47211
NM_001268139	WBGene00011868	best-18	2.57963	2.03721	0.576843	2.28111	7.57665	7.23317	7.03153
NR_052690	WBGene00011563	jmjd-4	9.15286e-06	5.19489e-06	8.85063e-06	2.96258e-05	1.31279e-05	4.01292e-06	2.15751e-05
NM_001268142	WBGene00011563	jmjd-4	2.89895	2.37807	3.2693	3.21428	2.22988	2.19827	1.49223
NM_066894	WBGene00010839	chl-1	26.6192	28.6191	25.6191	26.3436	27.2106	28.1913	20.5348
NM_066895	WBGene00044069	hat-1	178.229	176.022	163.808	168.397	218.41	183.426	188.152
NM_066899	WBGene00010844	prp-3	69.4907	74.4765	71.2262	72.2971	78.066	83.6088	79.859
NM_066901	WBGene00010362	enu-3.1	19.1637	22.9402	16.4929	20.2118	28.7175	28.4434	21.2375
NR_101846	WBGene00220077	T21C12.12	0	0	0	0	0	0	0
NM_001268154	WBGene00012641	epg-6	15.4126	9.17384	18.8327	18.9578	21.779	28.3735	35.6572
NM_001027664	WBGene00012641	epg-6	25.3699	28.057	39.1196	29.11	149.334	144.208	150.071
NM_066934	WBGene00012641	epg-6	32.3414	39.0358	30.8852	34.5043	89.8742	58.3781	81.0644
NM_181930	WBGene00012641	epg-6	79.2658	74.0314	59.9081	72.539	68.5814	49.9537	50.7741
NM_066939	WBGene00012645	mrpl-22	42.6544	43.8017	43.7215	45.4889	54.1804	51.3306	51.5527
NM_066940	WBGene00012646	lron-10	149.886	149.347	156.981	167.059	229.002	213.468	198.456
NM_066942	WBGene00012647	swt-4	20.9322	20.9877	19.3836	19.6034	19.2328	15.6603	13.2414
NM_066946	WBGene00012650	orc-1	108.682	106.041	97.934	100.105	75.4478	51.7318	35.4633
NM_066947	WBGene00012651	orc-4	68.1156	62.2827	57.0228	57.8518	55.3307	45.5094	36.9494
NR_101847	WBGene00220144	Y39A1A.30	0	0	0	0	0	0	0
NM_066959	WBGene00012361	mrpl-12	115.184	109.167	105.94	100.868	60.1124	47.4053	45.1798
NR_101848	WBGene00219614	linc-105	0	0	0.22033	0	0.779831	1.57378	4.22386
NR_101849	WBGene00219615	linc-109	0.0432225	0.04205	0.0434258	0.0359816	0.0850629	0.117707	0.101412
NM_001027718	WBGene00012967	kvs-4	0.203737	0.0989612	0.115018	0.299944	0.323453	0.600911	0.0659793
NM_001027717	WBGene00012967	kvs-4	0.302814	0.579738	0.521052	0.395044	0.469417	0.438048	0.430144
NM_066970	WBGene00010477	enu-3.6	7.55816	8.77413	6.92624	7.22971	7.24757	8.09037	6.16174
NR_101851	WBGene00220024	K11D9.10	0	0	0	0	0	0	0
NM_066987	WBGene00011268	pde-12	28.2871	28.4003	25.7344	25.9402	19.2341	18.0952	10.8479
NM_066993	WBGene00008078	vesa-1	8.48804	7.41311	8.00935	7.4524	9.79777	9.48352	7.92383
NR_101852	WBGene00220178	Y52D3.2	0	0	0	0	0	0	0
NM_067006	WBGene00012272	dhc-4	0.0426458	0.0393942	0.0370724	0.0318625	0.0847419	0.105431	0.0564048
NR_131685_12	WBGene00235179	F32D1.12	0	0	0	0	0	0	0
NM_067012	WBGene00012962	dmsr-5	0.404179	0.296834	0.529581	0.286463	1.11742	1.37406	0.892519
NR_101853	WBGene00220168	Y48A6C.10	0	0	0	0	0	0	0
NR_101854	WBGene00219619	linc-76	1.23838	0.985028	0.92317	0.920602	0.589981	0.576632	0.488874
NM_001276799	WBGene00219394	Y48A6C.8	43.9617	10.1865	30.0648	15.0572	31.5966	23.7039	21.9659
NM_001268183	WBGene00206461	Y47D3A.34	0.126941	0	0.122613	0.160946	0.173589	0.389246	0.42534
NR_101855	WBGene00220163	Y47D3A.35	171.347	90.447	0	93.1058	87.8672	0	181.304
NM_067051	WBGene00012933	mib-1	8.07944	8.2912	7.76515	8.02593	5.38697	4.69328	4.35411
NM_067055	WBGene00012935	mcm-10	41.5634	42.1992	39.0719	39.1466	31.8651	27.6424	22.5489
NR_101856	WBGene00220164	Y47D3B.25	0	0	0.438445	0	0	0	0
NM_067086	WBGene00013441	xpb-1	43.6305	46.1198	41.6333	42.5966	47.3333	47.8418	39.773
NM_067096	WBGene00013431	ceh-92	22.4142	27.5556	21.6447	24.1382	16.1848	17.8031	12.787
NM_001268204	WBGene00219421	Y66D12A.30	0.302351	0.638394	0.350448	0.657161	0.310093	0	0
NR_101857	WBGene00220150	Y41C4A.30	0	0	0	0	0	0	0
NR_052764	WBGene00206423	Y41C4A.29	33.102	28.1008	30.0142	29.1579	26.6887	26.5392	17.389
NR_101858	WBGene00206423	Y41C4A.29	0	0	0	0	0	0	0
NR_052775	WBGene00077725	mir-1832.1	0	0	0	0	0	0	0
NR_131452	WBGene00255580	mir-8211	0	0	0	0	0	0	0
NR_101860	WBGene00220214	Y79H2A.14	0	0	0	0	0	0	0
NR_101861	WBGene00219628	linc-161	0	0	0	0	0	0	0
NM_067177	WBGene00013542	lron-12	1.05438	0.575116	1.44616	0.897583	0.522666	1.22857	1.30159
NR_101862	WBGene00220207	Y75B8A.62	0	0	0	0	0	0	0
NR_101863	WBGene00219629	linc-87	0.308794	0.4075	0.626355	0.419479	0.158351	0.142031	0.245054
NM_067200	WBGene00013560	zip-12	16.593	13.5817	22.6461	17.7983	20.5319	38.847	38.7245
NR_101864	WBGene00220172	Y49E10.36	1.02802	0.542651	0	0	1.58152	2.3642	1.08776
NM_067227	WBGene00013042	cccp-1	3.91325	2.82815	4.35313	3.39602	6.10549	6.12893	6.36383
NM_181971	WBGene00013042	cccp-1	2.5495e-05	0.11854	2.16183e-05	0.413491	2.52694e-05	0.460498	2.58048e-05
NM_001268245	WBGene00013730	sql-1	10.9805	11.1014	10.737	11.5214	7.92403	8.14013	4.70856
NR_052807	WBGene00013730	sql-1	3.15241e-05	0.90194	0.131602	4.00328e-05	0.40414	1.35276	0.294061
NR_101865	WBGene00220228	Y111B2A.34	0	0	0	0	0	0	0
NM_067249	WBGene00013739	spin-4	19.5884	19.752	19.0643	18.6226	18.7394	17.4431	13.4959
NR_101866	WBGene00220229	Y111B2A.35	113.265	85.806	104.075	75.99	67.0631	46.1027	59.6909
NR_101867	WBGene00220230	Y111B2A.36	22.3774	10.7304	8.7413	10.445	9.24011	5.8161	6.80932
NM_067255	WBGene00013911	irld-60	0.0892602	0.0269239	0.0295599	0.0277154	0.274637	0.234602	0.242864
NM_067256	WBGene00013915	irld-20	0	0	0	0.0215778	0	0.0730599	0.0420182
NM_067258	WBGene00013912	irld-19	0	0	0.01478	0	0.0261559	0.0351903	0.0269849
NM_067259	WBGene00013913	irld-61	0.0121133	0	0.0140403	0	0.0124235	0.0111431	0.0256345
NM_067284	WBGene00012556	mrps-10	79.0778	75.4579	69.1561	73.7665	73.236	65.6881	64.9273
NM_067275	WBGene00012550	hpo-21	433.534	399.653	383.173	362.95	481.063	441.236	462.821
NM_001027657	WBGene00012551	cec-7	11.6127	10.7432	11.4026	13.6045	9.54612	12.6006	16.9571
NM_001027656	WBGene00012551	cec-7	59.8603	68.4471	54.403	61.0418	92.5353	90.9836	82.6877
NM_067278	WBGene00012552	enu-3.5	4.25484e-05	0.000317937	5.96799e-05	0.0450017	4.55104e-05	0.318505	0.000215351
NM_067277	WBGene00012552	enu-3.5	9.76759	11.0035	8.43227	10.1345	9.1922	9.65768	7.32208
NM_001268257	WBGene00206390	F14F7.7	0	0	0	2.24063	0	0	0
NR_101868	WBGene00219970	F54F12.6	0	0	0	0	0	0	0
NM_067312	WBGene00012718	dhhc-8	38.5034	40.1894	35.4506	37.7302	47.8929	41.2359	35.0478
NM_067318	WBGene00012715	snpc-1.2	72.8139	76.8054	63.3562	66.2709	57.9612	45.696	33.4272
NM_001268261	WBGene00010138	anoh-1	0.000134418	0.000144067	0.000158356	0.000149899	0.000492377	0.000122907	0.303359
NM_001268262	WBGene00010138	anoh-1	0.0539689	0.0406533	0.0715107	0.100647	0.245246	0.255848	0.00834325
NR_101869	WBGene00219977	F56A8.10	0	0	0	0	0	0	0
NM_001027419	WBGene00009730	myo-6	0.461568	0.44329	0.410658	0.406751	0.410662	0.629467	0.976683
NM_001027420	WBGene00009730	myo-6	2.62618	2.39548	2.80174	2.40948	1.6356	2.10405	2.19193
NM_067370	WBGene00009732	cope-1	71.0489	69.1122	67.9474	66.2718	89.9962	78.1886	73.1524
NR_101870	WBGene00220105	T27E9.11	4.48781	3.38419	5.20173	2.0902	0	1.17953	0
NR_101521	WBGene00219767	linc-131	0	0	0	0	0	0	0
NM_067397	WBGene00013574	lron-13	0.555152	0.327517	0.577226	0.550079	0.460517	0.555746	0.328259
NR_101871	WBGene00220210	Y76A2B.10	0	0	0	0	0	0	0
NM_067412	WBGene00011734	mlc-5	375.163	330.226	353.104	322.957	375.864	369.487	345.786
NR_101872	WBGene00220068	T12D8.12	0	0	0	0	0	0	0
NR_052846	WBGene00219223	mir-4814	0	0	0	0	0	0	0
NR_101873	WBGene00219599	linc-99	2.33222	1.84663	1.68952	0.633637	3.28892	1.07271	0.308468
NM_001027498	WBGene00023451	mlc-7	53.1798	45.8946	59.5197	47.6259	104.321	126.572	124.97
NM_067439	WBGene00010664	dbn-1	79.432	94.2905	83.1541	95.8605	72.387	84.811	62.9204
NM_067449_1	WBGene00021406	frm-5.2	8.38319	8.7204	8.70924	8.25601	6.4614	7.15204	4.93498
NM_067451	WBGene00021408	trpl-4	0.110837	0.0303366	0.123711	0.138297	0.0336815	0.0188814	0.00868723
NM_067454_1	WBGene00021404	trpl-3	0.110837	0.0303366	0.123711	0.138297	0.0336815	0.0188814	0.00868723
NM_067449	WBGene00021406	frm-5.2	1.07524	1.132	0.855062	1.08316	0.697624	0.715604	0.612513
NM_001268288	WBGene00001492	frm-5.1	7.36356	8.70895	8.40903	7.79092	6.53527	6.6089	4.75584
NM_001268287	WBGene00001492	frm-5.1	1.13549	0.546819	0.863869	0.798647	0.251685	0.859062	0.200832
NM_001307724	WBGene00235257	T05C7.4	3.32625	1.75579	5.78307	1.8074	11.94	9.17947	10.5586
NM_001307725	WBGene00235258	T05C7.5	6.05339	0	3.50818	3.28927	18.6252	66.8224	102.482
NM_001307726_2	WBGene00235260	T05C7.7	0	0	0	0	0	0	0
NM_001307727	WBGene00235261	T05C7.8	0	0	0	0	0	0	0
NM_001307728	WBGene00235262	T05C7.9	0	0	0	0	0	0	0
NM_001027990	WBGene00017929	grld-1	2.16673e-05	2.1145e-05	3.15986e-05	2.72067e-05	1.8933e-05	1.79818e-05	2.14894e-05
NM_171237	WBGene00017929	grld-1	50.4096	48.002	45.8569	46.1101	41.5146	36.1007	30.6019
NM_171238	WBGene00017929	grld-1	31.1705	37.0017	28.3259	33.7779	23.8337	22.6583	18.8249
NM_001307380	WBGene00219750	Y38C1AA.19	0.0739241	0.156086	0	0	0	0	0.234659
NM_001268290	WBGene00206487	best-19	7.16581	6.32268	6.63109	6.6605	8.07825	8.08172	5.32604
NM_067500	WBGene00019300	swt-1	31.8697	33.9137	44.6868	49.3832	17.3073	29.9951	16.6726
NM_001027963	WBGene00017578	drl-1	4.62657	3.66622	4.71334	4.17575	2.48167	2.90603	1.05494
NR_101875	WBGene00220192	Y66H1B.6	0	0	0	0	0	0	0
NR_052868	WBGene00219270	mir-5550	0	0	0	0	0	0	0
NM_067529	WBGene00022045	mrpl-55	71.8274	62.9294	65.7654	62.4699	103.525	106.638	138.061
NM_001307646	WBGene00235263	Y66H1A.8	0	0	0	0	0	0	0
NM_001307647	WBGene00235263	Y66H1A.8	0	0	0	0	0	5.88126	0
NM_001307409	WBGene00235264	M04G7.5	0	0	1.151	0	0.509231	1.37024	0.525369
NR_101876	WBGene00220031	M04G7.4	0	0	0	0	0	0	0
NR_101877	WBGene00219978	F56A11.14	0	0	0	0	0	0	0
NR_101879	WBGene00219763	linc-94	1.09832	1.0913	0.973497	1.12339	2.25288	2.37728	2.59772
NM_001307392	WBGene00021948	kvs-5	0.588228	0.46755	1.06696	0.570349	1.34799	1.228	1.0438
NM_001307396	WBGene00021948	kvs-5	2.1718	1.92836	2.16472	2.73125	3.88351	3.33931	3.6982
NM_001307395	WBGene00021948	kvs-5	6.38424e-06	3.52364e-10	0.000453235	6.91829e-15	3.61631e-08	3.40058e-06	3.14497e-05
NM_001307394	WBGene00021948	kvs-5	0.625975	0.00954766	0.0512167	0.445083	1.63815e-15	1.89031e-05	3.40129e-08
NM_001307393	WBGene00021948	kvs-5	2.91267e-06	3.9597e-12	1.45028e-05	3.94508e-15	3.74526e-24	1.57298e-11	1.73528e-13
NM_067577	WBGene00021948	kvs-5	0.00327628	0.908956	0.000762096	0.0546594	7.04218e-16	9.7957e-06	7.68029e-09
NM_001129348	WBGene00021948	kvs-5	1.8451e-12	1.10878e-07	0.576376	0.13787	0.000217278	3.14974e-11	1.94673e-09
NM_067586	WBGene00018932	mrpl-2	32.0758	33.2275	34.6524	33.6214	38.0465	29.3887	36.3003
NM_001307705	WBGene00018932	mrpl-2	161.75	149.344	138.231	136.068	150.758	104.811	131.559
NR_101880	WBGene00220182	Y55F3BL.5	163.939	185.893	218.169	204.555	93.4092	100.539	115.643
NM_067593	WBGene00021935	mrpl-46	47.5294	45.765	43.4286	42.9249	50.2161	41.4429	39.1926
NM_001307642	WBGene00235283	Y55F3BL.6	1.99814	0	0	2.17149	0	0	2.11425
NR_101881	WBGene00220183	Y55F3BR.19	0	0	0	0	0	0	0
NM_001028344	WBGene00021945	lem-4	29.344	29.0952	29.0654	30.456	27.1446	26.706	27.7522
NM_001028343	WBGene00021945	lem-4	3.58877	2.97716	5.04919	3.06703	9.71474	15.5273	7.04422
NR_101882	WBGene00220181	Y55F3AM.23	56.6259	28.7885	42.8573	30.4362	62.8967	3.76106	96.9409
NR_101883	WBGene00219762	linc-159	0	0	0.0261072	0	0	0	0
NM_001268300	WBGene00219399	Y55F3AM.21	7.37744	7.00965	5.13062	6.41396	3.78317	4.75057	4.68368
NM_067631	WBGene00021920	mrps-25	64.8691	60.1693	55.377	52.8725	23.7522	18.4064	16.7276
NM_067640	WBGene00016638	perm-4	1909.89	2045.91	1826.66	1913.66	4403.43	5232.25	4334.67
NM_067641	WBGene00016636	perm-2	2357.32	2448.17	2290.87	2285.44	4099.42	4151.57	3335.62
NM_067645	WBGene00016798	ets-8	0.1646	0.0868855	0.190784	0.0894397	0.0844073	0.151416	0.174165
NM_001268301	WBGene00219437	C50A2.7	0	0	0.188122	0	0	0	0
NM_067646	WBGene00016796	cec-2	14.7016	18.3029	17.5811	20.5619	9.93488	13.3195	8.31349
NM_001307602	WBGene00016796	cec-2	0.00120282	0.000351574	0.000273104	0.0009043	0.000170341	0.000180046	0.000208187
NM_001307603	WBGene00016796	cec-2	26.0184	30.9617	22.6758	22.872	12.9585	9.47225	7.5574
NM_001307604	WBGene00016796	cec-2	7.02299	3.1562	1.57229	3.30049	1.67357	1.0103	1.34025
NM_001307605	WBGene00016796	cec-2	8.2185	14.5747	4.04645	9.99502e-56	7.18602e-15	4.76511	5.16729
NR_052928	WBGene00219265	mir-4937	0	0	0	0	0	0	0
NM_001307561	WBGene00022309	rpc-11	0	0	0	0	0	0	0
NM_067675	WBGene00022309	rpc-11	78.3015	66.7734	72.7823	71.5453	90.2863	91.4708	126.288
NM_001307575	WBGene00235267	Y77E11A.23	10.4055	8.31833	11.6425	8.62823	30.4736	31.8146	30.7393
NR_101884	WBGene00220213	Y77E11A.21	0	0	0	0	0	0	0
NM_067699	WBGene00021518	hpo-6	12.512	12.0871	36.6433	26.6834	11.6956	60.9856	41.5329
NR_101885	WBGene00220152	Y41D4B.33	0	0	0	0	0	0	0
NR_101886	WBGene00220153	Y41D4B.34	0.000340722	6.01139e-05	0.000268394	0.00131166	0.00054024	0.00025719	2.73148e-05
NR_101887	WBGene00219752	anr-50	0	0	0	0	0	0	0
NR_101888	WBGene00220154	Y41D4B.35	0	0	0	0	0	0	0
NR_101889	WBGene00220155	Y41D4B.36	0	0	0	0	0	0	0
NM_001307624	WBGene00021510	frpr-19	0.000237697	0.000536311	0.000293505	0.00057525	0.000338767	0.000356385	1.2859
NM_001307623	WBGene00021510	frpr-19	7.0462	6.10181	7.38013	6.48058	4.04595	4.13532	2.72111
NM_001307456	WBGene00018681	denn-4	0.000476893	0.000564224	0.000475859	0.00038869	3.96784e-05	4.6765e-05	5.48216e-05
NM_001307460	WBGene00018681	denn-4	0.00025094	0.000239415	0.000239615	0.00013605	0.000163102	0.000104608	0.000230033
NM_001307455	WBGene00018681	denn-4	11.6148	13.3769	10.0358	13.3177	1.22407	2.02176	1.16028
NM_001307459	WBGene00018681	denn-4	6.23069	5.79344	5.15213	4.77958	5.00261	4.52957	4.84148
NM_001307458	WBGene00018681	denn-4	6.42042e-05	9.44651e-05	0.000154954	6.95215e-05	2.27338e-05	2.65979e-05	1.77317e-05
NM_001307462	WBGene00018681	denn-4	3.34848e-05	3.98262e-05	7.78426e-05	2.41135e-05	9.29319e-05	5.9321e-05	7.45207e-05
NM_001307457	WBGene00018681	denn-4	1.45842	2.08448	3.02841	2.21807	0.646673	1.05794	0.34991
NM_001307461	WBGene00018681	denn-4	0.775386	0.896879	1.55079	0.788824	2.6279	2.3628	1.46188
NR_101890	WBGene00220211	Y76B12C.11	1737.21	1884.25	1498.68	1568.95	1000.68	0	562.358
NM_067757	WBGene00022295	cng-2	0.0826625	0.0966338	0.12376	0.182356	0.0872544	0	0.161193
NM_001307651	WBGene00022295	cng-2	0.00670029	1.3379e-05	0.000112272	9.98826e-05	0.035639	0	0.0446655
NM_067759	WBGene00019873	arrd-26	0.554921	0.36615	1.072	0.92972	3.53335	0	2.71565
NR_131455	WBGene00255572	mir-8189	0	0	0	0	0	0	0
NM_001276809	WBGene00219423	C23H5.15	6.83804	4.74809	13.3516	5.78541	3.62424	0	2.7679
NM_001307648	WBGene00235274	C54E4.12	4.00204	3.29226	1.35548	3.06298	5.59714	0	3.71219
NM_001307649	WBGene00235274	C54E4.12	0.420152	4.35799e-06	3.65685e-07	0.466152	1.18344e-06	0	3.63566e-06
NR_101891	WBGene00219665	linc-101	0.646607	0	0.749469	0.351351	2.32107	0	2.39463
NR_101892	WBGene00220196	Y71G10AR.5	0	0	0	0	0	0	0
NM_001307348	WBGene00235277	T04C4.3	0	0	0	0	0	0	0
NM_001268309	WBGene00219413	Y38F2AL.12	0	0	0	0	0	0	0
NM_001307600	WBGene00021423	tftc-1	1.26996e-05	2.2993e-05	0.0834371	0.183568	2.53054e-05	0	2.05229e-05
NM_001307599	WBGene00021423	tftc-1	11.0797	12.1144	11.1872	11.4783	10.2205	0	6.66171
NR_052976	WBGene00219262	mir-4930	0	0	0	0	0	0	0
NM_001307550	WBGene00235340	C45G7.13	2.13393	2.34142	2.25106	2.07151	7.95507	0	14.1057
NR_131458	WBGene00235299	Y69A2AR.48	0	0	0	0	0	0	0
NR_131459	WBGene00235341	Y69A2AR.49	0	0	0	0	5.58026	0	3.59819
NM_001307686	WBGene00235288	Y69A2AR.46	0	0	0	0	0	0	0
NM_001307688	WBGene00235342	Y69A2AR.50	0	0	0	0	0	0	0
NM_001307689	WBGene00235343	Y69A2AR.51	0	0	0	0	0	0	0
NM_001307687	WBGene00235294	Y69A2AR.47	0.653744	0	0.757741	0.710458	0.670484	0	0
NM_171287	WBGene00022078	epg-9	82.6894	77.3828	86.3292	84.5017	55.7057	0	44.7689
NM_171288	WBGene00022078	epg-9	0.000106732	7.66686e-05	9.5807e-05	9.91946e-05	8.70256e-05	0	0.000101855
NM_001028394	WBGene00022078	epg-9	26.2838	33.0331	31.9599	27.3182	27.3138	0	27.7978
NM_067831	WBGene00022077	vamp-7	22.5565	21.3354	23.8129	23.652	44.5018	0	37.9295
NM_067841	WBGene00022377	gpx-4	3.75722	3.19529	2.17746	4.31002	5.99423	0	4.08598
NR_131460	WBGene00235346	Y94H6A.16	26.4527	26.9957	23.0524	22.4657	30.8479	0	21.1479
NR_131461	WBGene00235348	Y94H6A.17	236.551	264.64	292.596	241.725	349.428	0	248.429
NR_101893	WBGene00220216	Y94H6A.15	0	0	0	0	0	0	0
NM_001307340	WBGene00235350	Y54G2A.77	0	0.0242811	0.0533168	0	0	0	0.146017
NM_001268312	WBGene00219424	Y54G2A.72	0	0	0	0	0	0	0
NM_001028322	WBGene00021868	atln-1	13.7301	7.57633	14.6475	12.7424	21.7827	0	6.23222
NM_001028321	WBGene00021868	atln-1	68.9117	93.1428	77.6363	82.517	36.5668	0	48.7599
NM_001307323	WBGene00021868	atln-1	5.5518	0.689492	4.71162e-09	3.08606e-12	1.68146e-06	0	6.71331e-17
NM_001307324	WBGene00021868	atln-1	159.876	140.125	136.728	130.208	75.6531	0	71.0163
NM_001307339	WBGene00235268	Y54G2A.76	0.85253	0.276933	2.73641	0.85522	0.0672584	0	0
NM_001038357	WBGene00044489	pudl-1	6.77649	5.52492	9.021	6.9998	0.34406	0	0.354964
NM_001038358	WBGene00044490	pudl-2	2.57936	1.21822	2.5963	1.91793	0.069616	0	0
NM_001307327	WBGene00043702	Y54G2A.7	11.1242	9.50551	20.1148	12.8175	18.6851	0	16.6196
NR_101894	WBGene00220180	Y54G2A.74	23.5761	68.6701	166.428	0.0130205	47.2685	0	34.3449
NM_001276811	WBGene00235102	Y54G2A.75	539.575	481.824	472.75	471.912	629.047	0	539.846
NM_067873	WBGene00021870	samt-1	11.9052	11.7374	8.49174	7.29837	20.0864	0	15.878
NM_001307338	WBGene00219425	Y54G2A.73	0.451353	0.000637995	0.190902	0.000220251	6.07364e-05	0	0.433623
NM_001307337	WBGene00219425	Y54G2A.73	11.6107	15.2739	10.0306	13.5715	6.83215	0	4.26789
NM_067881	WBGene00021893	ndnf-1	8.85908	9.5898	11.3241	10.6989	10.7879	0	17.5331
NM_001307546	WBGene00235279	Y67D8C.22	0.362177	2.4688	0.605599	1.04467	3.94361	0	0.429479
NM_001307545	WBGene00235279	Y67D8C.22	0.171668	0.0877131	0.364883	0.279899	0.362833	0	0.37839
NR_101895	WBGene00219764	anr-47	0.0125537	0.0116417	0.0283112	0.0136224	1.113e-08	0	1.50225e-08
NR_131462	WBGene00235356	Y67D8A.10	59.902	54.5673	48.3558	53.7641	45.6272	0	37.014
NR_000454	WBGene00003286	mir-58.1	0	0	0	0	0	0	0
NM_067904	WBGene00022060	dmd-9	29.9668	31.3526	30.626	32.429	71.6265	0	74.1978
NM_067917	WBGene00021082	zip-11	11.1701	11.053	11.4515	12.1391	11.6073	0	7.91844
NM_001307578	WBGene00015249	otub-4	4.63628	0.0171042	0.500685	3.29335	7.96816	0	2.97815
NM_067932	WBGene00015249	otub-4	84.9897	85.8646	74.3594	76.8001	81.5805	0	57.5312
NM_001268320	WBGene00219410	C04C3.14	1.03088	3.26497	15.5334	17.9251	14.8019	0	9.81709
NM_067939	WBGene00015413	pdhb-1	163.851	178.883	192.595	194.007	66.8208	0	54.0287
NR_101896	WBGene00219646	linc-89	0	0	0	0	0.0123183	0	0.0127086
NR_102103	WBGene00235091	T08G3.15	0	0	0	0	0.199025	0	0.205332
NR_101897	WBGene00219706	linc-158	0	0	0	0	0.51829	0	0
NR_101898	WBGene00220034	M57.3	0	0	0	0	0	0	0
NM_001307513	WBGene00015038	nstp-6	5.6401	4.94034	4.64549	3.4482	21.409	0	15.5388
NM_001026092	WBGene00015038	nstp-6	0.326758	0.672242	0.246053	0.33179	0.987711	0	1.25113
NM_067970	WBGene00015038	nstp-6	8.41751e-06	2.63222e-06	1.22608e-07	9.91201e-06	4.04622e-05	0	3.09715e-06
NM_171306	WBGene00015038	nstp-6	1.19984	0.271148	0.995188	0.836999	0.616082	0	0.363277
NR_131464	WBGene00235357	Y37E11B.16	0	0	0	0	0	0	0
NM_067988	WBGene00022608	madf-9	4.40263	4.43772	4.53884	4.61627	3.63044	0	4.003
NR_101899	WBGene00220141	Y37E11AR.9	0	0	0	0	0	0	0
NM_068010	WBGene00021368	best-20	5.5356	5.53412	6.83746	6.62348	11.878	0	12.2766
NM_001307358	WBGene00019725	hpo-16	0.433562	2.27333	1.99751	1.87005	2.65012	0	2.73082
NM_001307357	WBGene00019725	hpo-16	41.4281	32.7686	34.4937	32.3839	28.1801	0	21.2961
NR_101900	WBGene00219715	anr-18	0.26653	0.183108	0.312741	0.283693	0.332951	0	0.342151
NM_001307361	WBGene00019726	bris-1	26.4569	33.3821	22.821	24.1304	14.3948	0	12.0652
NM_001307360	WBGene00019726	bris-1	0.0260919	0.0299987	0.0360302	0.0695667	0.0621129	0	0.0701126
NM_001307359	WBGene00019726	bris-1	15.3845	18.7906	16.285	22.6368	6.07953	0	2.48613
NM_068019	WBGene00019726	bris-1	5.32554	3.97258	8.58811	5.55088	4.74185	0	4.86056
NM_001307711	WBGene00235358	F56D6.21	0	0	0.0846073	0	0	0	0
NM_001307712	WBGene00235359	F56D6.22	0	0.177836	0.780988	0.183063	0.691053	0	0.356477
NM_001307708	WBGene00235285	F56D6.18	0	0	0.648909	0	0	0	0
NM_001307710	WBGene00235297	F56D6.20	0	0	1.28568	1.20545	1.13762	0	0
NM_001307709	WBGene00235293	F56D6.19	0	0	2.10924	0	1.86635	0	1.9255
NM_001307713	WBGene00235361	F56D6.23	0	0	0.337052	0	0	0	0
NM_001307309	WBGene00235115	F47C12.13	0	0	0	0	0	0	0
NR_101901	WBGene00220113	W02C12.4	0	0	0	0	0	0	0
NR_101902	WBGene00219934	F35F11.4	0	0	0	0	0	0	0
NM_068064	WBGene00018064	cdc-73	61.2958	62.6648	56.6775	58.5977	57.9156	0	54.5894
NM_001307478	WBGene00235306	W03D2.13	0	0	0	0	0	0	0
NM_001307479	WBGene00235306	W03D2.13	1.59363	0.917688	5.54145	5.66799	1.78303	0	2.22277
NR_101903	WBGene00219741	linc-77	0.499648	0.485528	0.421187	0.512142	0.43674	0	0.600775
NM_068069	WBGene00020982	ilys-6	0	0	0	0	0	0	0.181883
NM_001307494	WBGene00235365	F49F1.15	0	0	6.28103	5.8891	2.77887	0	0
NM_001307491	WBGene00235364	F49F1.4	0	0	0	2.94455	0	0	0
NM_001307490	WBGene00235363	F49F1.2	4.06424	0	3.14052	1.47227	0	0	0
NM_068086	WBGene00018646	mul-1	1.72508	2.08137	1.60674	1.84126	35.6694	0	51.5653
NM_001307495	WBGene00235367	F49F1.17	0.109666	0.231552	0	0.11918	0.787317	0	0.464153
NM_001307496	WBGene00235368	F49F1.18	0	0.147683	0.162142	0.354724	0.0956472	0	0
NM_001268328	WBGene00219216	K08D10.14	1.34599	1.06574	2.43767	2.33635	4.87952	0	5.57318
NM_001307638	WBGene00235369	K08D10.18	0.255727	0	0.118563	0.333494	0.472095	0	0.216469
NM_001307423	WBGene00235371	F30B5.11	0.407501	0.245832	0.303638	0.41122	0.298525	0	0.307986
NR_101904	WBGene00219684	linc-26	0	0	0	0	0	0	0
NR_131467	WBGene00235183	F36A4.23	0	0	0	0	0	0	0
NR_101905	WBGene00219689	linc-41	1.91751	2.22026	1.21882	1.41165	2.09349	0	0.785394
NR_101906	WBGene00219688	linc-21	3.36194	4.73235	3.89676	3.6536	0.919474	0	1.18577
NR_131468	WBGene00219497	linc-114	0	0	0	0	0	0	0.237142
NR_101907	WBGene00219497	linc-114	0.289752	0	0	0.157444	0.148586	0	7.43084e-06
NR_131469	WBGene00235372	F15E6.12	0.464103	0.979925	2.15173	1.00873	4.28389	0	2.45536
NM_068140	WBGene00020972	trpl-2	0.914081	0.659837	1.46699	1.11225	1.21793	0	0.669598
NR_101908	WBGene00220117	W03B1.17	0.857117	0.904874	2.9804	2.79442	7.91158	0	7.25539
NR_102140	WBGene00220202	Y73B3A.31	0.00012971	0.00182878	0.00240815	1.79237e-10	2.20588	0	3.93225
NR_131470	WBGene00235373	Y24D9A.14	0	0	0	0.488037	2.76346	0	2.37587
NR_101909	WBGene00220137	Y24D9A.13	0	0	0	0	0	0	0
NM_001028162	WBGene00019946	chat-1	136.331	139.335	148.238	164.732	206.091	0	183.635
NM_001028161	WBGene00019946	chat-1	0.000152843	0.000200416	0.000178781	0.00020506	0.000157097	0	0.000236292
NM_001047514	WBGene00019946	chat-1	159.101	159.181	168.365	177.531	222.335	0	202.391
NM_001307694	WBGene00019946	chat-1	54.2255	25.3373	23.3739	31.0023	71.4135	0	33.5616
NR_101910	WBGene00220038	R08C7.19	0	0	0	0	0	0	0
NR_101911	WBGene00220238	ZK185.9	0	0.663881	0.728879	3.41698	100.611	49.7488	169.673
NM_001307316	WBGene00017901	igeg-1	0.000647788	0.000137243	0.422561	0.00208859	1.22439	1.34031	1.29725
NM_001307317	WBGene00017901	igeg-1	2.28221	2.44001	3.66431	4.8667	32.8368	30.8749	30.5236
NM_001307299	WBGene00235120	R105.5	0.0515996	0.0544746	0	0	0	0	0
NM_068207	WBGene00017924	mrps-21	166.856	149.316	155.158	150.178	148.108	118.912	147.937
NM_001307452	WBGene00017920	jmjd-1.2	0.238715	0.345675	0.515571	0.117444	1.11982	0.947153	0.902722
NM_068210	WBGene00017920	jmjd-1.2	37.0988	45.4305	37.9678	41.6106	40.4421	47.5722	32.3431
NM_068209	WBGene00017920	jmjd-1.2	3.51943	3.04394	3.9456	2.77931	5.47858	7.34011	4.41275
NM_001307595	WBGene00020679	ogdh-1	42.191	32.5969	28.113	29.4211	21.0217	21.138	31.3785
NM_068216	WBGene00020679	ogdh-1	100.916	132.335	132.731	145.064	124.931	158.431	153.769
NR_101912	WBGene00220012	K08F11.8	0	0	0	0	0	0	0
NM_068219	WBGene00019544	miro-1	44.3467	44.7993	41.2246	43.3936	37.9027	33.6253	30.8464
NM_068227	WBGene00017120	tctn-1	0.552464	0.460457	0.775159	0.616191	1.32706	0.96293	0.769166
NR_101913	WBGene00220042	R11E3.18	0	0	0	0	0	0	0
NM_001307420	WBGene00235374	R11E3.19	2.16092	2.11233	2.13361	0.95675	0.24625	0.0736236	1.1009
NM_068253	WBGene00019165	mpz-4	0.10512	0.0369924	0.304606	0.171359	0.341404	0.854186	1.01959
NR_131676_11	WBGene00235188	K09C6.12	0	0	0	0	0	0	0
NR_131685_11	WBGene00235179	F32D1.12	0	0	0	0	0	0	0
NR_131685_10	WBGene00235179	F32D1.12	0	0	0	0	0	0	0
NR_053265	WBGene00206375	T08B6.64	48.1371	0	0	0	98.7394	44.2815	50.9343
NR_131474_9	WBGene00235247	Y9C9A.111	0	0	0	0	0	0	0
NR_131685_9	WBGene00235179	F32D1.12	0	0	0	0	0	0	0
NR_131685_8	WBGene00235179	F32D1.12	0	0	0	0	0	0	0
NR_101914	WBGene00219747	linc-79	0	0	0	0	0	0	0
NR_101915	WBGene00219671	anr-4	1.00653	0	0	1.09385	0	0	0
NR_131475	WBGene00235378	E03H12.27	0	0	0	0	0	0	0
NR_131476_1	WBGene00235379	T28H11.31	0	0	0	0	0	0	0
NM_001276822	WBGene00220250	C09B9.85	0	0	0.0416863	0	0.0122953	0	0
NR_131477	WBGene00255562	mir-8191	0	0	0	0	0	0	0
NM_001268339	WBGene00015628	best-6	0	0	0	0	0.019122	0.0171512	0.019728
NM_001038303	WBGene00044484	hot-9	0.471642	0.499618	2.2373	1.63527	2.1087	2.37887	2.12177
NM_001306843	WBGene00044484	hot-9	1.16553	0.972114	0.0534944	0.204884	0.000678802	0.0288311	0.0102506
NM_068320	WBGene00015327	snpn-1	69.9788	66.1699	58.5874	63.1102	89.3966	58.8973	65.1313
NM_001026087	WBGene00006428	tkr-3	0.809931	0.128488	0.139649	0.205949	2.2788e-05	0.389091	0.370071
NM_001026086	WBGene00006428	tkr-3	3.0987e-05	0.668667	0.735513	0.694485	0.330388	0.148555	9.21216e-06
NR_101916	WBGene00219653	linc-145	0	0	0	0	0.0259894	0	0
NM_001306831	WBGene00235380	C24D10.49	2.39272	1.26302	0	0	0	2.20107	10.127
NR_053796	WBGene00194829	mir-2217.1	0	0	0	0	0	0	0
NM_068384	WBGene00021160	gba-4	12.1346	6.93171	32.8882	20.4776	2.01887	1.64402	1.16475
NR_101917	WBGene00219694	linc-36	0	0	1.23123	0	0.65367	0.586301	0.224795
NM_001306824	WBGene00018314	F41H10.1	5.07714	4.14819	4.45198	2.44693	5.59202	2.15248	1.58829
NM_001306907	WBGene00022776	perm-3	6.17412	9.38161	12.0223	32.0605	35.1849	16.16	24.9033
NM_068401	WBGene00022776	perm-3	270.17	263.491	254.641	247.5	277.545	274.674	271.307
NM_068400	WBGene00022774	swsn-6	110.964	104.397	100.135	102.026	84.5352	77.5622	56.9658
NM_001306910	WBGene00235383	ZK616.65	0.00615072	0.0194803	0.0142583	0.0267372	0.028387	0.0339484	0.0390488
NM_001306909	WBGene00235383	ZK616.65	0.00615072	0.0194803	0.0142583	0.0267372	0.028387	0.0339484	0.0390488
NM_001307321	WBGene00235273	T11F8.12	0.92788	0.783664	0.322646	0.403351	2.66459	3.4996	2.84722
NM_068418	WBGene00015098	snpc-3.1	8.41024	8.34265	7.62126	8.30005	13.1148	10.9342	13.6922
NM_001268343	WBGene00206473	B0273.115	0.615269	0.541292	1.01029	0.668645	2.47151	2.59411	2.17007
NM_068427	WBGene00020463	cec-6	29.5501	34.0516	28.0391	30.6826	20.3739	20.7814	14.2702
NR_101918	WBGene00219682	linc-50	3.31125	4.07837	3.838	3.59851	15.2822	24.3682	33.2848
NR_101919	WBGene00220073	T19E7.29	0	0	0.617143	0	2.73038	1.95918	1.69015
NR_054420	WBGene00219252	mir-4815	0	0	0	0	0	0	0
NM_068447	WBGene00016955	perm-5	82.0816	85.9835	74.9197	82.3471	69.2742	75.137	45.7741
NR_101920	WBGene00219662	linc-134	0.246943	0.260702	0.11449	0.0536731	0.0506531	0.0227163	0.0783876
NM_068455	WBGene00016665	chil-11	0.528812	0.519775	0.338171	0.336886	0.112211	0.11742	0.135062
NR_101921	WBGene00219804	C06E7.95	0	0	0	0	0	0	0
NM_068486	WBGene00019151	pck-3	0.0524705	0.055394	0.255433	0.182472	0.107628	0.125496	0.0111039
NM_068488	WBGene00019257	dhhc-13	0	0.023472	0.0257701	0	0.0114013	0.0409048	0.0235252
NR_131533	WBGene00235386	H32C10.101	0	0	0	0	0	0	0
NM_068491	WBGene00019296	mcu-1	76.6809	78.0806	69.4161	74.846	68.1161	56.2928	38.3679
NM_068492	WBGene00019295	pfkb-1.2	71.9062	63.316	66.0663	64.2301	70.4954	54.1753	43.9176
NR_101922	WBGene00219785	B0350.85	0	0	0	0	0	0	0
NR_131535_1	WBGene00235389	C46G7.111	62.7652	68.7472	98.2123	99.7575	135.987	140.015	187.615
NR_131535	WBGene00235389	C46G7.111	62.7652	68.7472	98.2123	99.7575	135.987	140.015	187.615
NR_101923	WBGene00220029	M03D4.78	28.2101	0	16.3488	15.3287	28.9324	25.9505	29.8493
NR_131540	WBGene00255586	mir-8202	0	0	0	0	0	0	0
NM_068527	WBGene00015700	asp-9	0.25449	0.057572	0.0632087	0.118529	0.11186	0.26755	0.0192341
NM_068529	WBGene00016761	tkr-2	0.181212	0.22957	0.189035	0.157546	0.520384	0.166697	0.23009
NM_001307639	WBGene00235303	T13A10.64	0	0	0	0	0	0	0
NR_131545	WBGene00255582	mir-8201	0	0	0	0	0	0	0
NM_068566	WBGene00022251	blos-2	139.544	139.555	130.05	129.927	124.841	96.7955	96.1737
NM_001306851	WBGene00022251	blos-2	1.60706e-05	1.22399e-05	3.21793e-05	2.17391e-05	1.67792e-05	1.77071e-05	1.44645e-05
NM_001268353	WBGene00219218	Y73B6BL.288	8.41443	9.01295	7.54611	8.67717	2.39369	0.903996	0.519906
NM_001307630	WBGene00235289	Y73B6BL.289	0	0	0	0.670431	0	0	0
NR_101924	WBGene00189951	linc-29	7.9418	4.74667	5.99067	5.34286	10.3	10.8232	11.1599
NM_001306848	WBGene00022242	sfrp-1	2.60988e-10	5.72497	11.2298	6.23399	0.229054	11.7673	2.42888
NM_001306847	WBGene00022242	sfrp-1	8.98496e-06	0.21915	2.75418e-05	2.7611e-06	0.301158	0.303055	6.22449e-06
NM_068576	WBGene00022242	sfrp-1	1.9318	1.07647	2.83812	2.24711	3.26714	4.12073	3.53492
NM_001307381	WBGene00235291	C01G5.25	9.8706	12.3744	17.8763	8.7156	17.7158	33.4825	31.9853
NM_068599	WBGene00016613	best-9	1.90944	1.19456	3.83209	3.72747	0.961032	3.35035	2.11393
NM_068608	WBGene00018168	irld-7	0	0	0.0256432	0	0.0453805	0	0
NM_001306888	WBGene00235391	F38A5.22	15.1515	12.3269	11.9226	12.085	12.2605	14.3215	13.7521
NM_001047472	WBGene00017480	nstp-2	41.9906	30.1671	35.8076	27.1081	27.833	24.4216	15.1937
NM_001047471	WBGene00017480	nstp-2	59.0218	61.481	49.1143	57.3254	39.6576	35.4757	30.2589
NR_101925	WBGene00219791	C01B10.48	0	0	0	0	0	0	0
NR_101926	WBGene00219792	C01B10.49	0	0	0	0	0	0	0
NR_024306	WBGene00077722	mir-58.2	0	0	0	0	0	0	0
NR_101927	WBGene00220203	Y73B6A.14	2.91538	0	0	3.1683	2.99003	0	0
NR_131551	WBGene00236785	Y73B6A.16	7.17085	3.7852	4.15579	6.81883	2.75793	4.12281	4.74221
NR_101928	WBGene00220204	Y73B6A.15	0	0	0	0	0	0	0
NM_001083193	WBGene00015938	anat-1	9.02984	9.25809	9.96587	9.88666	10.8101	9.78477	11.5038
NM_001083194	WBGene00015938	anat-1	140.641	131.783	113.983	119.156	156.272	126.004	124.507
NR_101929	WBGene00219994	H34C03.21	0	0	0	0	0	0	0
NR_101930	WBGene00219822	C17H12.36	0	0	0	0	1.55426	0.46469	1.06901
NM_001306836	WBGene00236786	C17H12.37	1.35694	1.02325	0.898746	0	1.78931	2.31819	2.87159
NM_068664	WBGene00020683	ribo-1	302.376	319.997	291.433	300.193	384.077	355.335	278.552
NR_131560	WBGene00236787	T22D1.22	0.367244	0	0.425665	0	0	0	0
NM_001268359	WBGene00219412	ZK381.62	0	0	0	0	0	0	0
NM_068681	WBGene00016084	cht-3	104.309	113.106	94.4033	97.1661	69.3751	104.33	33.8439
NM_068689	WBGene00015555	ufl-1	34.7906	36.6276	34.6411	36.3838	51.5319	55.0581	54.6079
NM_068718	WBGene00016404	mutd-1	92.4785	78.105	77.5322	75.402	92.8808	73.3464	93.0865
NM_001268360	WBGene00206380	C42D4.18	6.84607	4.90214	10.6262	6.27547	24.9106	24.3147	23.6844
NM_001307391	WBGene00235295	C42D4.19	1.11911	0.836871	1.0269	0.962822	9.08648	10.0374	6.06872
NM_001028173	WBGene00020046	best-16	0.310753	0.203089	0.428794	0.305548	0.151767	0.27225	0.140919
NM_068748	WBGene00017051	afmd-1	2.37489	2.20146	1.84631	1.69963	0.831703	1.33212	1.04193
NM_001306768	WBGene00236806	D2024.18	0	0	0.218205	0	0.193078	0.173179	0
NM_068763	WBGene00018344	npr-27	0.41273	0.352731	0.501167	0.683482	0.665183	0.831661	0.623876
NM_068769	WBGene00018350	ifo-1	1.56459	1.29531	2.75606	2.08794	3.10689	3.84974	2.39018
NM_068770	WBGene00021495	sqst-2	2.70856	1.85866	5.18007	3.75301	6.28504	8.81409	7.37983
NR_101931	WBGene00220067	T12B3.10	0	0	0	0	0	0	0
NR_131566	WBGene00016739	pitr-1	0.94729	0.419951	0.810728	0.875592	3.36157	4.25889	2.09394
NM_068779	WBGene00016739	pitr-1	62.8245	77.4247	61.8797	76.4877	125.834	171.202	113.419
NM_001307267	WBGene00016739	pitr-1	20.0064	23.0266	22.1175	24.6237	44.4756	47.9368	32.9551
NM_068789	WBGene00015217	tes-1	20.9799	23.4389	22.4744	23.136	11.657	18.4327	9.00423
NM_068806	WBGene00018906	egas-4	0.0643433	0.0603808	0.116012	0.0621558	0.0439939	0.0723429	0.0378235
NM_068810	WBGene00019900	vdac-1	1163.68	1251.74	1183.77	1265.73	882.374	905.561	972.172
NM_001307270	WBGene00043466	R05G6.3	0	0	0	0	0	10.597	8.12606
NM_001307231	WBGene00018635	nprl-2	26.8337	29.1842	25.3944	24.9031	24.6697	20.9809	13.7859
NM_001307230	WBGene00018635	nprl-2	25.3498	21.2403	20.532	21.7649	8.89338	7.7662	7.47155
NM_068830	WBGene00017990	cec-4	108.745	96.9807	101.381	98.1235	86.7813	74.8116	60.9196
NM_068831	WBGene00017993	cec-5	260.344	240.203	262.035	248.741	333.817	299.166	244.452
NM_001028033	WBGene00018472	nep-16	1.89713e-06	0	0.0675697	0.0226541	0.0548392	0.0141293	0.0394378
NM_001028034	WBGene00018472	nep-16	1.08813e-09	0.00858821	0.0345943	0.136602	2.52363e-07	0.000263474	2.96655e-07
NM_001028032	WBGene00018472	nep-16	0.0509849	5.82196e-06	0.160177	5.98082e-06	1.59041e-08	0.0590686	0.0170458
NM_068846	WBGene00001584	nrde-4	29.1663	31.0498	24.909	29.441	19.8362	18.9798	15.2246
NM_068845	WBGene00001584	nrde-4	22.4934	17.5159	20.6155	15.467	15.8224	12.014	12.5844
NM_001307279	WBGene00018473	cima-1	1.22928	1.05119	1.13986	0.868347	2.48368	3.50553	2.04211
NM_068856	WBGene00017997	mrpl-1	81.0623	73.7163	74.6302	70.2616	64.5981	53.2689	48.8411
NM_068857	WBGene00017999	emc-6	145.481	119.224	129.913	117.346	113.792	89.8267	117.248
NM_001028005	WBGene00023487	mrps-24	99.1967	85.0634	89.938	85.068	176.066	143.844	196.818
NM_068865	WBGene00016844	sucg-1	79.8612	78.2239	70.8164	71.9306	34.0627	25.2016	17.2679
NR_131572	WBGene00016842	npr-35	9.01392e-07	1.58375e-06	2.21219e-06	1.02309e-06	1.60927e-06	8.08313e-07	1.22735e-06
NM_001027917	WBGene00016842	npr-35	0.972638	1.00708	0.693761	0.853744	3.95181	3.87144	2.92914
NM_068870	WBGene00016848	klo-1	6.49775	5.92914	8.78389	7.20051	14.4074	15.9308	16.4135
NR_101932	WBGene00219858	C46A5.15	0	0	0	0	0	0	0
NM_068875	WBGene00016699	del-7	0.0642016	0.0564823	0.14883	0.0465142	0.0768198	0.0492161	0.0792544
NM_068895	WBGene00016383	zgpa-1	23.0392	20.6762	22.2536	22.5935	32.9391	33.387	40.528
NM_068896	WBGene00016384	cdgs-1	48.5109	50.6056	47.0255	49.4677	50.5722	49.0377	34.6337
NM_068897	WBGene00016384	cdgs-1	0.802994	0.73336	0.096232	1.40188	1.16523	1.43566	1.3652
NM_171912	WBGene00016957	atic-1	17.1737	16.3816	19.4371	17.1592	2.96146	5.36628	2.27181
NM_001027930	WBGene00016957	atic-1	2.27673	1.5503	2.32881	1.66714	19.7472	19.4305	16.3616
NM_171387	WBGene00016957	atic-1	0.391442	7.38669e-06	0.373145	9.86101e-06	9.29175e-06	7.00393e-06	9.76497e-06
NM_001268379	WBGene00219436	C49H3.16	0.514159	0.271403	0.695276	0.558763	0.747043	0.512391	0.589372
NM_001307240	WBGene00249815	F20D12.12	0	0	0	0	0	0	0
NR_101933	WBGene00219909	F20D12.10	0	0	0	0	0	7.21445	0
NM_068931	WBGene00019019	frpr-10	0.340825	0.193747	0.273491	0.0854752	0.18822	0.434113	0.138704
NR_101934	WBGene00219832	C26B2.14	0	0	0	0	0	0	0
NM_068954	WBGene00018360	irld-8	0.387828	0.286606	0.359618	0.295031	1.49159	2.46167	1.47731
NM_001307277	WBGene00249817	F42G8.19	4.42527	3.57258	3.37927	2.82893	7.31513	6.75278	6.22487
NR_056287	WBGene00219254	mir-4920	0	0	0	0	0	0	0
NM_001307594	WBGene00235296	C07G1.15	4.36627	0	5.06085	9.49011	165.689	184.761	249.479
NM_068978	WBGene00006620	svh-1	0.296962	0.203681	0.488351	0.35032	0.483956	0.699549	0.641074
NR_131582	WBGene00020373	gpx-6	0.0831759	1.85278e-07	4.24028e-07	7.1687e-07	3.46164e-07	1.36869e-07	0.0803368
NM_001028197	WBGene00020373	gpx-6	1.66406	1.82554	1.94701	1.50336	4.56035	2.09062	3.70555
NR_101935	WBGene00219729	anr-44	0.0113817	0	0.0131813	0.0185508	0.0642971	0.0837896	0.168488
NM_001307320	WBGene00235275	T09A12.8	0	0	0	0	0	0	0
NM_068994	WBGene00019503	tbce-1	46.1494	46.747	39.9947	43.0118	24.9839	18.7036	11.5205
NM_068995	WBGene00018072	nprl-3	17.3172	19.0651	12.8027	15.0191	13.8939	14.6767	12.339
NM_001307140	WBGene00018072	nprl-3	25.5002	23.8478	25.8207	27.194	24.605	17.6375	11.1295
NM_001307631	WBGene00235282	F17E9.18	0	0	1.71021	0	0	0	0
NM_069021	WBGene00017075	nap-1	533.188	531.468	514.86	511.538	1920.82	1614.94	3081.46
NR_101936	WBGene00219723	linc-135	0	0	0	0	0	0.0179984	0
NM_171401	WBGene00015650	pkg-2	0.14963	1.21828	0.382305	0.535609	3.21205	1.81711	1.40786
NM_171402	WBGene00015650	pkg-2	4.56551	5.14047	5.36639	5.26156	0.0100018	3.30842	1.77848
NM_171403	WBGene00015650	pkg-2	38.4798	41.1465	46.5674	39.8553	16.7032	27.0842	13.7187
NM_001028370	WBGene00022004	npr-22	1.96277e-05	0.535525	1.12808e-05	0.289347	0.324851	3.23725e-06	1.63179e-05
NM_001028369	WBGene00022004	npr-22	0.977481	0.159138	1.15187	0.413174	0.504214	0.899203	0.896379
NM_069060	WBGene00022007	mpst-6	0.0379556	0.0667841	0.307955	0.302488	0.0908309	0.256047	0.0535483
NM_069060_1	WBGene00022007	mpst-6	0.0379556	0.0667841	0.307955	0.302488	0.0908309	0.256047	0.0535483
NM_001307662	WBGene00235290	Y59H11AR.10	0	0	0	0	0	0.393611	0
NR_131584	WBGene00249826	F42A9.18	0.0187015	0.0197381	0.0216703	0.0406351	0.115052	0.103195	0.0989057
NR_131585	WBGene00249826	F42A9.18	0.274626	0.523117	0.489013	0.677013	3.57764	3.47977	9.00851
NM_001307514	WBGene00235280	F42A9.17	0.616912	1.30257	2.8602	0.670431	2.53084	2.27	2.61104
NR_101937	WBGene00219695	linc-126	0.0326518	0.0344711	0	0.0354845	0.0669758	0.330402	0.690984
NM_001307489	WBGene00235271	C49C8.8	0.0896608	0.141985	0.415696	0.243598	3.03457	4.53636	5.39183
NM_001307098	WBGene00255375	F08B4.8	0.661375	1.04734	6.64374	3.11459	3.95681	2.4336	1.74952
NM_001268389	WBGene00009007	otub-3	81.8877	74.4692	68.5966	69.0513	56.1164	51.2126	38.0277
NM_001268390	WBGene00009007	otub-3	140.206	127.134	112.667	112.253	67.6844	42.8128	34.7622
NM_001268391	WBGene00009007	otub-3	6.15796e-05	4.9681e-05	5.42086e-05	5.00743e-05	3.52156e-05	3.59191e-05	7.71514e-05
NM_069104	WBGene00009013	mrps-33	150.706	124.396	134.398	128.393	201.556	168.59	184.311
NR_101938	WBGene00219908	F20C5.10	0	0	0	0	0	0	0
NM_001268411	WBGene00206515	T28C6.11	11.4695	12.2994	8.4772	9.75814	8.76938	14.9139	9.70466
NR_131587	WBGene00219453	linc-97	0.809082	0.569442	0.625194	2.93091	0.2766	0.496185	1.14146
NM_001136373	WBGene00007493	npp-23	24.821	18.2025	17.5214	17.0615	6.82149	12.4414	1.8053
NM_069136	WBGene00007493	npp-23	58.2571	59.0266	50.0724	54.3427	46.4065	33.8935	33.5326
NM_069138	WBGene00006409	hdl-2	0	0.0113452	0.037368	0.046715	0.0551082	0.0197714	0.0113709
NM_001276830	WBGene00219476	D1046.16	0	0	0	0	0	0	0
NM_001268428	WBGene00008366	tpra-1	12.9329	12.8402	11.4683	11.1416	41.6465	46.7463	43.2678
NM_001268429	WBGene00008366	tpra-1	99.122	81.1348	91.8637	82.9043	211.279	278.482	224.513
NR_101940	WBGene00219575	anr-8	20.6549	16.0652	17.3207	17.1752	12.3572	10.7238	12.7902
NM_069161	WBGene00008275	nstp-1	3.02697	3.61459	3.47847	3.37383	2.65285	2.69155	3.06292
NM_001307129	WBGene00008275	nstp-1	16.5136	13.5208	15.0316	14.92	17.8884	14.8203	15.8847
NR_101941	WBGene00219626	linc-157	0.0106606	0.00844094	0.00463368	0	0.0410009	0.00735504	0.00846006
NM_001268433	WBGene00013881	mans-4	5.42284	0.0150309	1.94353	0.0174809	0.00613918	0.00336099	0.0393739
NM_001268432	WBGene00013881	mans-4	34.5972	35.5813	29.1897	31.8245	24.0158	17.5832	13.3458
NR_101942	WBGene00220234	ZC410.9	0	0	0	0	0	0.323451	0
NM_001026116	WBGene00002046	icln-1	68.8894	63.6475	63.6187	65.4302	95.5127	86.5941	110.24
NM_001026117	WBGene00002046	icln-1	27.9613	23.8959	20.513	23.4091	18.3272	14.9414	18.5431
NR_101943	WBGene00219793	C01F6.15	0	0	0	0	0	0	0
NM_001268435	WBGene00219207	C01F6.14	31.3864	19.8811	26.0718	19.3285	97.6431	110.196	130.627
NM_001307139	WBGene00006438	nrfl-1	10.9411	9.87077	11.8974	17.5423	8.90314	12.4912	10.8032
NM_001047443	WBGene00006438	nrfl-1	0.586989	0.713664	0.849013	4.0647	2.04322	4.22615	3.84464
NM_001047444	WBGene00006438	nrfl-1	2.83666	3.23422	2.20066	1.09377	1.53622	1.06072	0.5636
NM_171410	WBGene00006438	nrfl-1	3.57321	7.21097	12.2782	1.89936	2.58497	4.93645	12.3919
NM_001307138	WBGene00006438	nrfl-1	0.248134	0.679811	1.08181	0.446579	0.64613	1.67329	4.42335
NM_171411	WBGene00006438	nrfl-1	2.6393	2.96205	2.82923	4.74474	3.23833	4.21844	3.1885
NM_001276832	WBGene00006438	nrfl-1	6.37335e-07	1.31274	0.0175679	6.75894	9.10987	4.18276	0.000453198
NM_001276833	WBGene00006438	nrfl-1	1.56643e-64	3.18365e-37	4.6013e-44	1.68817e-78	1.99756	4.65355e-50	9.46375e-35
NM_001307199	WBGene00006438	nrfl-1	0.136936	0.117889	0.243194	0.582675	0.16567	0.0828444	0.142958
NM_001047445	WBGene00006438	nrfl-1	15.8389	9.91163	13.7053	9.46006	4.37489	17.2525	9.01233
NR_131588	WBGene00235286	C01F6.16	0.336766	0	0.234203	0.731963	2.90127	3.09793	3.63462
NM_069189	WBGene00009073	delm-1	0.0418253	0.0110389	0.0605985	0.0454537	0.0536203	0.0384752	0.0110639
NM_001307549	WBGene00235302	C07C7.3	0	0	0	0	0	0	0
NR_101944	WBGene00220131	Y11D7A.21	0	0	0	0	0	0	0
NM_069219	WBGene00012437	hum-9	0.275131	0.176037	0.251254	0.199333	1.39806	2.05543	1.66732
NR_101945	WBGene00220132	Y11D7A.22	0	0	0	0	0	0	0
NM_069270	WBGene00009542	copb-2	77.6992	102.402	85.6337	95.9549	49.1797	64.0827	46.4765
NM_069273	WBGene00007887	gadr-2	4.07438	4.16234	4.30524	3.78848	4.66503	4.34579	2.90816
NM_069283	WBGene00007886	ethe-1	20.9937	19.3654	21.3018	19.5936	20.3867	19.3763	14.0588
NM_001268472	WBGene00011454	lron-14	2.62609	1.83781	2.81524	1.59387	0.219699	0.511635	0.103639
NM_001268471	WBGene00011454	lron-14	0.295518	0.23767	0.358785	0.198843	0.129785	0.155329	0.163598
NM_069301	WBGene00009186	trcs-1	522.849	507.785	434.289	464.555	632.636	524.767	499.031
NR_101946	WBGene00219597	anr-11	0.10189	0.109299	3.70877e-08	2.02872e-09	1.14014e-10	0.210089	8.72145e-12
NR_101947	WBGene00219837	C28D4.17	0	0	0	0	0	0.46469	0.534505
NR_056442	WBGene00219221	mir-5551	0	0	0	0	0	0	0
NM_069338	WBGene00011749	ssp-36	0	0.164553	0.361328	0.254086	0.31972	0.860304	0.329852
NR_056450	WBGene00219229	mir-4934	0	0	0	0	0	0	0
NR_101948	WBGene00219551	K07F5.21	2.80994	0.593301	0	0.610742	1.15276	1.55092	0.594644
NM_069376	WBGene00009319	mccc-1	54.1584	67.6839	60.2288	65.8367	24.9105	26.2138	18.7914
NM_069383	WBGene00009323	best-13	5.59596	5.20957	6.56478	5.74971	10.6263	9.57792	6.83622
NM_069398	WBGene00008150	mam-2	0.0330273	0.00871687	0.0669922	0.0179462	0.237111	0.15191	0.157259
NM_069404	WBGene00009678	magu-4	0.0141435	0.0149399	0.0163879	0.0153679	0.0145212	0.0130024	0.0149526
NM_001306932	WBGene00009678	magu-4	6.16624	5.31072	7.43427	5.29615	7.1606	11.0632	7.29806
NM_001268521	WBGene00008123	ent-4	0.00245458	0.910857	0.000148632	0.112142	0.000610426	1.71307	0.0602993
NR_131591	WBGene00008123	ent-4	3.93657	2.9047	4.01488	3.43622	0.00484006	0.529301	1.25825
NM_001268522	WBGene00008123	ent-4	4.33192e-07	0.000373684	8.98437e-07	2.32546e-29	1.44099	5.56015e-12	0.000416869
NM_001268523	WBGene00008123	ent-4	5.00047	2.99563	2.57892	3.13115	1.45246	2.02791	1.1358
NM_001276841	WBGene00219418	F44D12.19	3.99628	6.32842	16.212	8.68594	18.4438	33.0858	35.9423
NM_069409	WBGene00009681	gipc-2	0.912195	0.599213	3.90029	2.1589	1.28898	0.951016	0.707815
NR_131594	WBGene00255426	C04G2.14	15.3427	14.0787	20.1615	17.5947	32.6148	35.1205	40.6801
NM_069439	WBGene00007310	irld-21	0.0855189	0.0902839	0.0991232	0.154897	0.131563	0.209784	0.120651
NM_069441	WBGene00010677	gtbp-1	218.43	288.581	238.86	272.381	179.624	210.89	224.404
NR_131595	WBGene00235166	K08F4.15	0	0	0	0	0	0	0
NM_069451	WBGene00011776	hpo-5	61.887	55.4627	54.2799	53.6046	66.267	60.5962	59.677
NR_101949	WBGene00220005	K04D7.17	0	0	0	0	0	0	0
NM_001268542	WBGene00010558	ptp-4	0.391096	0.599989	0.000236209	0.659075	0.000441982	0.000305421	0.188532
NM_001268541	WBGene00010558	ptp-4	0.436599	2.99466e-05	1.24308	0.140122	1.43905	1.57556	0.700326
NR_101950	WBGene00219577	linc-119	0	0	0	0	0	0.0172806	0
NM_069487	WBGene00004140	ebax-1	10.8173	11.3976	13.0329	12.6989	5.97049	8.54228	4.85683
NR_101951	WBGene00220025	K11E8.7	0	0	0	0	0	5.31304	0
NM_069512	WBGene00011239	pges-2	64.398	61.2008	60.0353	62.2695	39.3998	37.8316	29.2473
NM_001028170	WBGene00011241	mpz-5	0.667482	0.873794	0.711771	0.725388	1.31438	3.09466	1.58204
NR_056531	WBGene00219215	F13B12.15	0.628843	0	0	0.683397	1.93484	0	0
NR_101952	WBGene00219874	F01D4.12	0	0	0	0	0	0	0
NR_101953	WBGene00220252	C02F4.12	0	0	0	0	0.189411	0.16989	0
NR_131604	WBGene00255435	K08C7.10	0	0	0	0	0	0	0
NM_001268578	WBGene00013857	orc-5	988.951	866.405	865.776	796.491	728.156	506.587	462.267
NM_001268577	WBGene00013857	orc-5	61.3279	61.2506	53.0073	56.9147	55.4033	45.5514	33.6834
NM_069588	WBGene00013858	ssp-34	0.779343	0.822766	3.25195	2.71025	1.43874	1.72061	0.329852
NM_069599	WBGene00007384	swt-3	18.6375	24.1801	15.9237	21.3858	2.84732	2.6102	3.28315
NR_101954	WBGene00219603	anr-57	0.124595	0	0	0.0677019	1.08617	0.630383	0.988761
NM_069606	WBGene00011258	best-15	2.19808	2.14516	1.91081	1.90268	1.9398	2.03377	1.05472
NR_056577	WBGene00219224	mir-4924	0	0	0	0	0	0	0
NR_131605	WBGene00255441	T11G6.11	1.22758	0	1.42286	0	1.25901	0	1.29891
NR_131606	WBGene00255574	mir-8208	0	0	0	0	0	0	0
NR_101955	WBGene00220194	Y69E1A.15	0	0	0	0	0	0	0
NM_001083213	WBGene00008775	mogs-1	41.6733	29.1651	37.5896	28.8398	18.7921	29.1892	8.97711
NM_001129299	WBGene00008775	mogs-1	1.55135	0.0021442	0.00319284	0.00213193	1.47988	0.900371	1.07442
NM_001083212	WBGene00008775	mogs-1	21.1977	38.3036	21.7822	33.2312	25.212	10.1457	17.3877
NR_101956	WBGene00219935	F36H1.17	0	0	0	0	0	0	0
NM_001307089	WBGene00006490	kdin-1	4.23864e-05	0.185506	6.30208e-05	0.151256	6.42215e-05	2.57065e-05	2.66017e-05
NM_001047478	WBGene00006490	kdin-1	16.2039	17.9796	14.4068	15.7389	9.84536	8.56081	4.89099
NM_001307086	WBGene00006490	kdin-1	2.28407e-06	0.00326237	3.98497e-06	0.0103688	2.33821e-06	4.31325e-06	5.16863e-06
NM_001307087	WBGene00006490	kdin-1	0.750479	0.32274	0.777546	1.07972	0.311759	1.19988	0.803119
NM_001307088	WBGene00006490	kdin-1	1.86876e-07	0.000743126	1.1074e-06	0.000702026	9.42717e-07	4.95843e-07	1.11456e-12
NM_001047477	WBGene00006490	kdin-1	0.0728624	0.0786462	0.245124	0.0811282	0.14063	0.165276	3.2578e-07
NM_001307085	WBGene00006490	kdin-1	9.5932e-09	1.21385e-05	6.64314e-08	4.70119e-05	3.19156e-08	8.16121e-08	2.82682e-13
NM_001083218	WBGene00006490	kdin-1	0.00325377	0.00132193	0.012693	0.00546988	0.00419149	0.0229421	6.91325e-08
NR_101957	WBGene00220032	M7.15	0	0	0	0	0	0	0
NM_069675	WBGene00011482	hpo-4	33.185	30.4204	30.0399	30.0448	46.3783	40.6955	38.3774
NM_001268607	WBGene00011480	enpl-1	314.172	354.497	298.902	304.15	359.239	381.509	396.224
NM_001268608	WBGene00011480	enpl-1	6.42607	0.0130933	1.75823	0.00844958	0.00238995	0.000682855	0.00275187
NM_069681	WBGene00004204	swsn-4	92.6589	101.719	95.8181	98.7226	86.6477	84.1292	58.9433
NM_069683	WBGene00008502	skih-2	17.0557	18.7982	16.3197	17.451	7.93317	8.98996	4.71363
NR_101958	WBGene00219576	anr-13	105.452	105.574	85.8281	81.6935	47.9627	40.3709	32.7285
NM_001268617	WBGene00219217	C08F8.15	2.99211	2.28137	3.54034	2.57425	8.16196	5.35199	4.46315
NM_001028157	WBGene00011123	nuaf-3	20.0257	17.8228	17.9484	16.9549	27.9718	21.4205	29.4126
NM_001136392	WBGene00011123	nuaf-3	1.45584e-05	2.34676e-05	1.4871e-05	1.92468e-05	3.0419e-05	0.000138019	3.1463e-05
NM_001307160	WBGene00235134	R07H5.16	0	0	0	0	0	0	0
NM_001268618	WBGene00011130	zip-6	0.128649	2.23629e-05	0.409234	0.17477	0.274296	0.739722	0.680739
NM_001268619	WBGene00011130	zip-6	2.6335e-05	0.152859	0.000832765	2.91563e-05	0.0500902	9.24962e-05	3.6676e-05
NM_069707	WBGene00007808	best-7	4.89903	4.58427	5.04744	4.30225	1.0658	0.910431	0.549787
NM_069719	WBGene00007114	mttu-1	10.8621	9.08123	9.79348	8.99582	13.0279	10.422	9.16234
NR_101959	WBGene00219550	B0035.20	0	0	0	0	0	0	0
NM_001276857	WBGene00235095	B0035.21	9.99071	6.32842	9.26402	4.34297	16.3944	25.7334	59.199
NM_069734	WBGene00007110	leo-1	112.153	103.649	99.4528	99.3218	147.733	139.299	125.183
NM_069755	WBGene00009035	gfat-2	312.847	388.599	280.191	343.847	127.14	97.534	69.9381
NM_001276862	WBGene00219489	C10C6.13	11.4534	0	0	0	0	0	12.1189
NM_069764	WBGene00007514	catp-8	55.3829	58.7068	53.779	57.9986	81.1427	93.4115	62.8523
NR_101960	WBGene00219991	H21P03.11	0	0	0	0	0	0	0
NM_001268631	WBGene00219458	H21P03.10	0	0	0	0	0	0	0.265545
NR_101962	WBGene00219891	F12F6.20	0	0	0	0	0	0	0
NR_101963	WBGene00219941	F40F11.6	0	0	0	0	0	0	0
NM_001268640	WBGene00009587	mig-38	26.8026	27.2724	29.0119	29.1895	23.8998	28.2268	16.7588
NM_001307148	WBGene00235132	ZK792.12	0	0	0	0	0	0	0
NM_069816	WBGene00011910	alg-3	0.00765354	0.00852462	0.00770888	0.00706066	0.271754	0.310208	0.165679
NM_069817	WBGene00011910	alg-3	0.0346128	0.0297173	0.202343	0.183319	2.93389e-05	4.7082e-05	1.00206e-05
NR_131611	WBGene00255570	mir-8207	0	0	0	0	0	0	0
NM_069831	WBGene00010349	dyf-18	0.114998	0.169968	0.50651	0.0499899	0.16512	0.232732	0.170353
NR_101964	WBGene00219602	linc-151	0.0238821	0.0504256	0.0553625	0.025954	0.0489873	0.087877	0.176889
NR_101965	WBGene00219939	F38H4.16	0	0	0	0	0	0	0
NM_001268669	WBGene00219327	ZK822.9	0	1.48066	0	1.52419	47.4682	10.3214	17.8082
NM_001268670	WBGene00219327	ZK822.9	0	0	0	0	0	0	0
NM_001268671	WBGene00219456	ZK822.10	1.74917	1.23108	0	0	2.39194	1.60906	1.23387
NM_069866	WBGene00014095	gdh-1	536.112	576.231	576.186	599.245	342.731	367.818	430.947
NM_001307701	WBGene00235284	T12G3.11	0	0	0	0	0	0	0
NM_069878	WBGene00011740	mrpl-51	122.842	106.601	103.004	103.205	108.194	83.9519	99.3853
NM_001268679	WBGene00011737	sqst-1	52.2017	63.6227	122.218	125.26	730.097	695.644	1474.26
NM_001268680	WBGene00011737	sqst-1	16.6351	10.3424	16.4695	6.94426	61.9386	101.946	95.7225
NR_101966	WBGene00220033	M18.11	0	0	0	0	0	0	0
NM_069901	WBGene00010892	dhhc-6	88.0142	77.8825	75.181	76.4077	75.8428	65.7142	52.8632
NM_069909	WBGene00007091	eri-12	33.9177	31.7939	39.1795	34.9879	77.9531	93.3478	85.4155
NM_069914	WBGene00009436	marb-1	119.815	108.986	117.719	110.226	165.466	142.552	188.54
NM_001268701	WBGene00016588	hpo-12	26.1157	25.0069	22.9534	23.935	37.9512	35.0307	26.9765
NM_001268703	WBGene00016588	hpo-12	48.6977	43.2323	44.7171	43.3111	39.041	35.0892	33.7999
NM_001268702	WBGene00016588	hpo-12	0.179466	7.08591e-06	6.65771e-06	0.266453	0.26389	0.443643	0.178043
NM_001268704	WBGene00016588	hpo-12	13.4909	11.2175	12.0036	10.2951	19.731	14.3411	8.73847
NR_101967	WBGene00220013	K09E10.5	0	0	0	0	0	0	0
NR_131615	WBGene00235167	F19B6.9	0	0	0	0	0	0	0
NM_001307488	WBGene00235298	F19B6.10	0	1.75579	7.71076	9.03702	3.41142	13.7692	43.9941
NM_182302	WBGene00013921	best-22	4.17959e-13	0.444107	8.91463e-25	8.62349e-14	0.599686	0.116847	8.39082e-06
NM_001129361	WBGene00013921	best-22	8.93726e-05	0.330605	0.000467197	4.52704e-05	0.000173127	0.76658	1.12149
NM_001276869	WBGene00013921	best-22	1.03319	0.261203	1.24988	1.83335	1.35984	1.68837	1.63559
NM_069952	WBGene00013921	best-22	5.54291	5.26716	5.81334	4.22188	1.76663	2.54062	2.33923
NM_001307060	WBGene00013921	best-22	1.72012e-13	0.00444944	3.23546e-28	6.48302e-12	0.233206	0.191211	0.0652859
NM_001307059	WBGene00013921	best-22	2.93638e-12	0.112785	1.58328e-26	4.02659e-11	0.31768	0.306837	0.104315
NR_131616	WBGene00235129	ZC518.8	0	0	0	0	0	0	0
NM_001307157	WBGene00235129	ZC518.8	0	0	0	0	0	0	0
NM_069957	WBGene00009211	wdr-46	54.1738	56.0368	51.3486	54.847	62.8334	66.2364	46.3327
NM_069963	WBGene00009217	oig-7	0.139579	0.0982376	0.107856	0.134834	0.0954356	0.171199	0.0656401
NM_001268713	WBGene00008580	dsb-1	18.0045	18.2005	16.4368	16.0278	10.5622	7.06069	4.65756
NM_001268714	WBGene00008580	dsb-1	2.50766e-05	2.55082e-05	3.14618e-05	2.61771e-05	2.72361e-05	2.67776e-05	3.10988e-05
NM_001307026	WBGene00008580	dsb-1	61.3229	59.3712	52.7143	58.1939	38.5964	27.1166	26.1282
NM_001307095	WBGene00255469	C25G4.17	0.050699	0.0535238	0.117528	0	0.103994	0.139915	0.0536451
NM_069979	WBGene00007733	smz-1	1.31262	0.994133	1.48836	1.89166	1.99009	2.12623	1.99277
NR_131626	WBGene00235111	C25G4.16	28.388	0	0	0	0	0	0
NM_001268721	WBGene00007736	igdb-2	20.5023	23.2679	24.417	21.2027	33.2664	37.3681	23.5558
NM_001268720	WBGene00007736	igdb-2	17.7733	20.0633	18.4772	20.1817	28.9524	27.3347	19.4923
NM_069986	WBGene00011418	igdb-1	4.84825e-06	3.96437e-06	5.37511e-06	2.63469e-06	4.36716e-06	3.62228e-06	3.89624e-06
NM_069986_1	WBGene00011418	igdb-1	16.1388	17.9657	16.7252	17.6607	26.0836	24.4991	17.4773
NR_101968	WBGene00219640	anr-56	0	0	0	0	0	0.109556	0
NM_001268726	WBGene00219454	C26H9A.3	0.356708	0	0.206726	0	0	0.164068	0
NM_001268729	WBGene00007752	wdfy-3	1.73032	2.22164	1.58199	1.82052	0.448221	0.564105	0.215545
NM_001268728	WBGene00007752	wdfy-3	1.92141	2.31131	1.76878	1.84121	1.98404	2.91067	0.947766
NM_001268730	WBGene00007752	wdfy-3	2.04827	2.27585	2.21119	2.38583	1.09028	1.30638	0.583817
NM_001268727	WBGene00007752	wdfy-3	2.27465	2.36778	2.47229	2.41331	4.80551	6.70256	2.55172
NM_001307306	WBGene00235112	T23B5.6	0.356708	0	0.206726	0	0	0.164068	0
NM_001306982	WBGene00206520	ZK897.10	0	0	0	0	0	0	0
NM_001268733	WBGene00206520	ZK897.10	0	0	0	0	0	0	0
NR_101969	WBGene00220251	F07C6.8	0.127631	0.0269484	0.118347	0.0554812	0.0785392	0.0234816	0.0270094
NM_001268750	WBGene00014139	nstp-5	60.5686	61.1799	57.0564	58.415	71.87	62.7404	45.0464
NM_001268751	WBGene00014139	nstp-5	1.42653e-05	1.96278e-05	2.1314e-05	3.03782e-05	1.39989e-05	1.56304e-05	2.12996e-05
NM_070112	WBGene00008033	spin-2	3.15799	2.89333	4.2086	3.80992	1.08437	2.22677	1.85475
NM_001026107	WBGene00023421	rde-11	37.0914	36.9354	28.6247	33.3682	63.0541	46.8939	35.8427
NM_070122	WBGene00007203	best-1	1.67585	2.20547	2.51896	5.5718	6.87503	17.4928	8.90662
NM_070123	WBGene00007204	best-2	0.140849	0.332382	0.249685	0.432193	0.467357	1.32616	0.885437
NR_131630	WBGene00235128	F09E8.12	0	0	0.432232	0.607892	0.191229	0	0
NM_001268778	WBGene00206469	F58D2.5	1.52014	0.534947	0.440491	0.550673	0.909456	1.04879	0.402119
NR_101974	WBGene00219548	JC8.17	1.14501	0.568848	0.858746	1.17114	0.34539	1.11525	0.427603
NM_070146	WBGene00010437	cox-11	46.5819	44.1973	40.2562	42.3683	36.9764	31.5699	22.8953
NM_001306923	WBGene00010437	cox-11	13.9808	12.4926	13.3264	12.5527	6.61994	6.47831	11.193
NM_182298	WBGene00013462	micu-1	1.23838e-07	9.07252e-07	2.01854e-08	5.96733e-06	2.21705e-05	2.80878e-06	0.000113567
NM_070154	WBGene00013462	micu-1	1.97666	2.81662	1.53076	3.5788	5.44962	6.16385	6.40303
NM_001268795	WBGene00013462	micu-1	5.52964	3.25152	4.55443	4.47168	3.40611	0.414089	4.70191
NM_001268794	WBGene00013462	micu-1	37.4932	38.5147	36.4389	33.695	37.7646	31.518	34.2657
NM_070174	WBGene00013378	emc-3	203.701	185.845	193.627	177.029	384.836	388.753	464.482
NM_001268812	WBGene00013383	aptf-2	51.655	52.6875	10.9209	33.6917	36.5555	22.4558	30.304
NM_001268811	WBGene00013383	aptf-2	18.3228	14.1956	51.0026	31.5597	33.3252	33.9211	25.7948
NM_070191	WBGene00010714	mam-3	0.156403	0.192637	0.292068	0.217186	0.258435	0.247786	0.211461
NR_131685_7	WBGene00235179	F32D1.12	0	0	0	0	0	0	0
NR_131685_6	WBGene00235179	F32D1.12	0	0	0	0	0	0	0
NR_131676_5	WBGene00235188	K09C6.12	0	0	0	0	0	0	0
NR_131685_5	WBGene00235179	F32D1.12	0	0	0	0	0	0	0
NR_131685_4	WBGene00235179	F32D1.12	0	0	0	0	0	0	0
NR_131685_2	WBGene00235179	F32D1.12	0	0	0	0	0	0	0
NR_131685_3	WBGene00235179	F32D1.12	0	0	0	0	0	0	0
NR_131473_2	WBGene00235209	Y17G9A.90	0	0	0	0	0	0	0
[truncated: 47,824 more rows]
[truncated: 83 more columns]
