# Supplementary material for: An intestinal microRNA modulates the homeostatic adaptation to chronic oxidative stress in C. elegans
Source: Aging (Albany NY). 2016 Sep 12;8(9):1979–96. doi: 10.18632/aging.101029 (PMC5076448; doi:10.18632/aging.101029)
Supplement: Supplementary file 4 [file aging-08-1979-s004.xlsx]

## Sheet: S3_DEseq
WormBase_ID	Gene_Public_Name	Fold_Change (log2)	p-value
WBGene00000136	amt-4	3.01879	7.1256e-127
WBGene00009642	F42G4.5	2.89744	1.57753e-129
WBGene00012683	asp-17	2.7256	1.01961e-65
WBGene00012757	Y41C4A.11	2.70024	5.7466e-56
WBGene00235090	C38D9.13	2.39685	2.04788e-36
WBGene00003995	pgp-1	2.30768	4.28851e-44
WBGene00007454	C08F11.7	2.29387	4.29638e-37
WBGene00019105	asp-8	2.24296	4.3508e-41
WBGene00045416	Y37H2A.14	2.23421	7.12203e-35
WBGene00004003	pgp-9	2.14221	1.56898e-92
WBGene00018997	F57B9.3	2.13502	1.44363e-27
WBGene00015597	fbxa-162	2.13404	6.7587e-30
WBGene00045457	F33H12.7	2.10383	2.75813e-58
WBGene00008010	C38D9.2	2.07345	4.43066e-25
WBGene00007440	C08E8.4	1.99801	5.24261e-43
WBGene00008042	C40H1.7	1.97376	2.69301e-23
WBGene00009237	F28H7.3	1.89879	1.92614e-51
WBGene00007605	asp-10	1.87035	1.40399e-43
WBGene00044457	C18H7.11	1.8317	4.24442e-21
WBGene00006539	tbb-6	1.8211	2.47841e-43
WBGene00007097	B0024.4	1.80726	3.02187e-21
WBGene00007660	C17H1.7	1.75548	5.48342e-20
WBGene00007725	C25F9.5	1.7392	2.12912e-42
WBGene00008850	F15B9.6	1.73878	2.6998e-18
WBGene00018725	F53A9.2	1.68518	4.27303e-29
WBGene00019411	K05F1.10	1.67113	1.21293e-21
WBGene00012961	Y47H10A.5	1.65678	4.62307e-40
WBGene00022572	ZC239.14	1.63893	2.72754e-17
WBGene00015167	B0403.3	1.5907	7.49095e-30
WBGene00022083	Y69A2AR.12	1.57483	6.08835e-18
WBGene00023483	Y75B8A.39	1.54646	1.95327e-14
WBGene00012101	zip-10	1.51996	5.98593e-21
WBGene00016953	C55C3.3	1.51795	4.86454e-19
WBGene00017487	F15E6.6	1.51188	8.62207e-16
WBGene00000783	cpr-3	1.49892	5.89403e-19
WBGene00017361	F10E9.12	1.48343	1.31531e-24
WBGene00019564	K09D9.1	1.48263	1.17866e-24
WBGene00194717	ZC239.22	1.48114	1.96979e-14
WBGene00007073	ugt-2	1.43713	2.12398e-27
WBGene00044644	B0205.13	1.4256	1.53663e-40
WBGene00010904	ugt-62	1.41696	5.00586e-28
WBGene00008577	F08G2.5	1.41031	7.64262e-23
WBGene00009518	clec-166	1.40671	4.80161e-18
WBGene00194695	B0462.5	1.40004	3.26282e-13
WBGene00010795	M01A8.1	1.3828	1.27108e-20
WBGene00014132	ZK896.1	1.37419	1.03043e-11
WBGene00008621	F09C8.1	1.34217	2.05524e-16
WBGene00006627	tsp-1	1.32626	2.71802e-11
WBGene00004993	spp-8	1.31495	3.49721e-31
WBGene00021581	clec-70	1.30914	7.26215e-11
WBGene00006533	tba-7	1.29679	1.60772e-20
WBGene00020774	T24E12.5	1.29466	2.65203e-18
WBGene00008863	F15D4.6	1.27429	6.80183e-11
WBGene00013037	Y49E10.18	1.27035	1.6832e-13
WBGene00017592	F19C7.2	1.25512	8.03621e-13
WBGene00016063	delm-2	1.24947	5.81184e-11
WBGene00013837	fbxa-30	1.24873	6.41335e-10
WBGene00012464	arrd-7	1.24546	2.38181e-14
WBGene00020128	R193.2	1.22927	3.04003e-19
WBGene00003997	pgp-3	1.22499	4.68122e-22
WBGene00009226	cyp-37B1	1.21758	1.2267e-09
WBGene00022419	Y102A11A.9	1.20098	9.574e-10
WBGene00016862	C52A10.1	1.20035	1.32566e-33
WBGene00022848	ZK1055.7	1.19288	4.1425e-30
WBGene00001754	gst-6	1.18817	8.19131e-11
WBGene00013180	cutl-10	1.18799	1.36801e-11
WBGene00000190	arf-1.1	1.18483	3.5939e-09
WBGene00020760	T24C4.4	1.17774	3.11798e-12
WBGene00015048	faah-2	1.16268	1.45569e-46
WBGene00007724	C25F9.4	1.16028	1.50321e-09
WBGene00011517	cgt-1	1.15203	5.13751e-09
WBGene00045411	C25F9.11	1.14418	2.76019e-10
WBGene00021518	hpo-6	1.14277	2.78282e-15
WBGene00015096	B0261.8	1.13538	4.90796e-13
WBGene00010769	asah-1	1.13403	2.63397e-13
WBGene00016585	oac-59	1.13193	2.91604e-10
WBGene00015403	clec-10	1.1245	2.1677e-11
WBGene00007072	ugt-1	1.12325	9.4194e-11
WBGene00016912	clec-86	1.12246	1.71963e-09
WBGene00018823	F54E2.1	1.11022	1.20345e-18
WBGene00022181	pho-9	1.10531	1.16879e-20
WBGene00006470	tag-120	1.09419	1.64289e-14
WBGene00019858	R03H10.6	1.09164	7.39238e-09
WBGene00016204	gsto-1	1.09135	7.51028e-09
WBGene00019967	cyp-33C8	1.08997	1.56916e-14
WBGene00005003	spp-18	1.08896	6.81152e-17
WBGene00044646	B0205.14	1.08833	6.90943e-08
WBGene00019368	K03H6.2	1.08626	2.86065e-08
WBGene00045067	F07C6.6	1.08593	8.06536e-09
WBGene00021339	Y34F4.4	1.08579	3.07366e-09
WBGene00006628	tsp-2	1.08142	5.46118e-08
WBGene00021979	Y58A7A.5	1.07905	3.55181e-11
WBGene00013716	Y106G6H.1	1.0769	1.87993e-16
WBGene00016785	C49G7.7	1.07604	2.97229e-09
WBGene00001399	fat-7	1.07308	3.71989e-13
WBGene00019515	ugt-19	1.07265	1.32369e-10
WBGene00007885	ugt-21	1.0638	2.53434e-08
WBGene00007228	acs-7	1.05787	1.15904e-18
WBGene00016425	C34H4.2	1.05743	2.41205e-10
WBGene00194926	K08D8.12	1.05623	1.03546e-07
WBGene00010822	M01G12.9	1.05592	8.41461e-14
WBGene00007180	B0457.6	1.05255	8.20125e-11
WBGene00001786	gst-38	1.0525	1.68012e-07
WBGene00206354	F27E5.9	1.0508	1.43522e-07
WBGene00044468	Y69A2AL.2	1.05077	2.65982e-10
WBGene00018260	cyp-33C7	1.04426	9.89471e-11
WBGene00010567	K04G2.9	1.0394	6.69477e-10
WBGene00009515	clec-170	1.03938	1.41283e-07
WBGene00011672	cyp-13A5	1.03499	3.12669e-12
WBGene00020981	W03D2.6	1.02899	1.55202e-09
WBGene00007614	gnrr-2	1.02788	3.61579e-07
WBGene00015596	fbxa-161	1.02357	4.09658e-08
WBGene00007694	C23H4.6	1.0189	4.92109e-10
WBGene00020579	T19D12.4	1.01822	4.0661e-11
WBGene00006053	ssq-4	1.01138	4.86902e-07
WBGene00006611	tre-5	1.00804	5.18344e-08
WBGene00013215	Y54G11A.4	1.00488	1.28792e-08
WBGene00004810	skr-4	1.00458	2.7149e-10
WBGene00000667	col-92	1.00313	2.3227e-10
WBGene00002188	kgb-2	1.00274	1.20904e-08
WBGene00007308	C04G2.9	0.996253	3.58565e-07
WBGene00010977	R02D5.3	0.993047	5.02243e-07
WBGene00004987	spp-2	0.98872	1.01207e-08
WBGene00004811	skr-5	0.978335	1.27116e-06
WBGene00014672	C08F11.6	0.977138	1.19265e-06
WBGene00018547	clec-78	0.975561	5.69778e-07
WBGene00008564	acox-1	0.97137	5.5824e-22
WBGene00016717	math-22	0.971179	7.69809e-07
WBGene00011175	R09E10.5	0.970634	1.45964e-06
WBGene00010657	K08D8.3	0.965396	8.77855e-15
WBGene00021121	W09G12.7	0.958068	4.09094e-07
WBGene00015050	clec-51	0.951696	2.20407e-09
WBGene00022142	Y71G12B.2	0.948959	2.41463e-06
WBGene00009192	F27E5.1	0.948288	1.6217e-09
WBGene00050904	Y70C5A.3	0.945418	2.62835e-06
WBGene00022847	ZK1055.6	0.939692	7.01646e-15
WBGene00021978	Y58A7A.4	0.93613	6.34706e-07
WBGene00007453	fbxa-98	0.931506	1.66402e-06
WBGene00044107	F58G6.9	0.930859	5.68919e-08
WBGene00009102	F25B3.5	0.926659	2.37421e-08
WBGene00022413	Y102A11A.3	0.925526	2.24092e-09
WBGene00018418	F44E2.4	0.921936	9.28778e-08
WBGene00206494	C15H11.16	0.920422	4.04929e-06
WBGene00022096	Y69A2AR.25	0.916981	2.58086e-06
WBGene00014813	M176.9	0.916806	2.28656e-06
WBGene00008296	cdr-2	0.915761	3.44136e-09
WBGene00009804	F47B8.3	0.912341	4.67243e-09
WBGene00010851	M04C3.2	0.912045	6.28466e-06
WBGene00004096	pqm-1	0.911195	5.86444e-16
WBGene00220140	Y34F4.7	0.908915	6.87672e-06
WBGene00003958	pcp-3	0.907861	2.97003e-06
WBGene00015598	fbxa-163	0.907843	6.28448e-06
WBGene00013901	ugt-16	0.899698	4.06041e-09
WBGene00013091	Y51B9A.9	0.894493	5.72478e-06
WBGene00001577	gem-4	0.891326	1.80317e-10
WBGene00018931	ugt-52	0.884434	1.50869e-06
WBGene00008629	cpt-5	0.882799	2.20044e-10
WBGene00019579	oac-57	0.882383	1.18919e-05
WBGene00001182	egl-13	0.882334	1.64316e-06
WBGene00019682	K12H4.7	0.88232	2.79189e-15
WBGene00017690	ceh-60	0.87828	1.64842e-06
WBGene00009971	F53C11.1	0.876743	3.5801e-07
WBGene00022324	fbxa-26	0.871787	2.3741e-06
WBGene00011737	sqst-1	0.869984	2.9314e-20
WBGene00020631	T20F7.3	0.866495	9.05238e-06
WBGene00006508	tag-163	0.865893	2.45369e-12
WBGene00015389	scav-1	0.864116	4.41159e-09
WBGene00006051	ssq-2	0.860067	1.49958e-05
WBGene00011707	T11B7.2	0.859684	1.12936e-05
WBGene00005833	srw-86	0.857575	1.91462e-05
WBGene00004859	sma-5	0.857334	2.59091e-14
WBGene00005551	sri-39	0.857019	1.79911e-05
WBGene00013763	Y113G7B.14	0.854071	4.75606e-07
WBGene00011596	T07G12.5	0.852868	5.98667e-06
WBGene00009681	gipc-2	0.851605	2.18892e-05
WBGene00008199	C49C3.9	0.851417	2.1895e-06
WBGene00011052	arrd-11	0.850323	2.58397e-05
WBGene00006464	bath-47	0.849947	1.37471e-05
WBGene00010238	F58B4.5	0.847831	1.69374e-07
WBGene00006372	syx-2	0.846898	2.31079e-09
WBGene00019060	F58F9.7	0.846068	3.78447e-16
WBGene00009653	F43D9.1	0.845862	2.39851e-05
WBGene00010070	nep-17	0.8419	8.91369e-16
WBGene00020414	T10E9.4	0.840774	5.50204e-06
WBGene00021336	Y34F4.1	0.838762	1.95074e-06
WBGene00077770	M04D5.3	0.834744	6.09157e-07
WBGene00019154	glf-1	0.830595	3.26613e-05
WBGene00008862	F15D4.5	0.830258	3.33676e-05
WBGene00044798	tbx-43	0.827528	6.05467e-08
WBGene00000703	col-129	0.825519	6.72306e-06
WBGene00012959	Y47H10A.3	0.821873	4.23629e-05
WBGene00010573	K04H4.2	0.816762	5.27799e-05
WBGene00010116	F55F3.2	0.816154	6.27484e-07
WBGene00019605	K10B2.2	0.810058	1.14572e-06
WBGene00045461	C25F9.14	0.809912	2.41007e-05
WBGene00000669	col-94	0.808764	1.50046e-07
WBGene00000715	col-142	0.80834	1.73802e-12
WBGene00010047	F54D1.6	0.806582	4.74145e-11
WBGene00016440	gipc-1	0.802866	6.02091e-05
WBGene00020455	fbxa-59	0.801038	8.45851e-06
WBGene00020325	bath-46	0.800244	1.01228e-05
WBGene00045404	C06C3.11	0.798407	7.46698e-05
WBGene00194713	F19B10.13	0.797929	7.33282e-05
WBGene00008372	D1054.5	0.795963	7.63285e-05
WBGene00003432	msp-36	0.795906	6.32452e-05
WBGene00004013	pha-4	0.795789	9.87948e-07
WBGene00000022	abt-4	0.794789	3.15407e-09
WBGene00016424	C34H4.1	0.794785	9.2674e-06
WBGene00015602	fbxa-158	0.785537	5.39029e-06
WBGene00012256	lpr-5	0.785427	9.38281e-05
WBGene00010063	dhrs-4	0.785124	8.22627e-09
WBGene00017082	DC2.5	0.781973	3.39334e-08
WBGene00006948	wrt-2	0.780375	6.79756e-05
WBGene00007932	zip-5	0.778858	2.02064e-05
WBGene00017937	F30H5.3	0.778701	0.000112114
WBGene00005649	srp-8	0.778251	3.95614e-05
WBGene00023432	K12B6.9	0.777898	2.58387e-05
WBGene00012257	lpr-4	0.775956	0.000100532
WBGene00194651	C33D9.13	0.775826	2.79007e-05
WBGene00010540	K03H1.5	0.7751	2.60328e-11
WBGene00001207	egl-43	0.774805	4.31962e-05
WBGene00003645	nhr-55	0.774661	7.48586e-05
WBGene00000175	aqp-7	0.774061	3.64223e-12
WBGene00021070	W07B8.1	0.773421	5.43931e-06
WBGene00016088	clec-266	0.772683	3.36966e-08
WBGene00044035	F27E5.7	0.769735	0.000114115
WBGene00003689	nhr-99	0.767714	3.86539e-05
WBGene00012822	Y43F8B.12	0.766252	0.000109282
WBGene00010700	nipi-3	0.766208	8.98962e-16
WBGene00016464	C36B7.1	0.763529	0.000157605
WBGene00018952	F56C9.8	0.763029	1.29306e-05
WBGene00013643	Y105C5A.24	0.762259	1.68489e-06
WBGene00018921	sago-2	0.761137	2.41941e-05
WBGene00003467	msp-81	0.760474	8.54774e-05
WBGene00009957	F53B2.8	0.758595	1.19287e-17
WBGene00011564	ugt-50	0.758072	1.73222e-08
WBGene00044759	T06E6.15	0.756663	0.000108304
WBGene00011190	swt-6	0.755308	3.34559e-05
WBGene00011590	bus-19	0.75508	0.000132175
WBGene00017071	aagr-1	0.752859	1.97311e-10
WBGene00009805	F47B8.4	0.752782	0.000169551
WBGene00011445	T04F8.7	0.75147	0.000163429
WBGene00007479	C09F9.2	0.748884	3.62281e-05
WBGene00010475	K01F9.2	0.747083	0.000107574
WBGene00006429	arrd-3	0.74642	4.01749e-05
WBGene00008634	F10A3.4	0.7464	0.000179715
WBGene00016763	C49A9.9	0.745353	9.18066e-05
WBGene00009706	F44G3.2	0.74425	0.000181588
WBGene00016613	best-9	0.743565	0.000187252
WBGene00019935	R07E4.1	0.742519	0.000167131
WBGene00016719	math-24	0.741662	0.000237146
WBGene00001132	alp-1	0.739905	3.39344e-10
WBGene00000712	col-139	0.739754	3.63588e-05
WBGene00017991	clec-180	0.736273	0.000259951
WBGene00185092	K08D8.7	0.734671	0.000209243
WBGene00017881	asp-13	0.733929	1.25809e-07
WBGene00050899	T10C6.15	0.730579	0.000261151
WBGene00010336	F59F4.1	0.729996	3.29196e-08
WBGene00003463	msp-76	0.728013	0.000223826
WBGene00004155	pqn-73	0.727809	0.000246117
WBGene00045415	Y43F8B.15	0.726789	0.000142942
WBGene00001476	fmo-1	0.726039	2.46502e-09
WBGene00013284	daf-22	0.724537	7.04102e-16
WBGene00007130	B0272.4	0.723761	1.00962e-09
WBGene00007218	C01A2.6	0.722315	0.000237783
WBGene00002979	lfe-2	0.722116	8.85417e-12
WBGene00017306	F09F9.1	0.720754	0.000172864
WBGene00016735	fhod-1	0.720213	2.29682e-08
WBGene00000830	ctl-1	0.720128	0.000131056
WBGene00016450	clec-5	0.720035	1.36111e-10
WBGene00000831	ctl-2	0.719188	4.08254e-15
WBGene00007691	C23H4.2	0.71901	0.000360751
WBGene00004335	ref-2	0.718686	0.00020438
WBGene00011042	R05H10.1	0.715352	0.000390071
WBGene00007112	B0035.13	0.713535	1.47941e-06
WBGene00022178	Y71H2AM.13	0.712323	5.79519e-15
WBGene00003711	nhr-121	0.709609	0.000140724
WBGene00002051	ifa-3	0.708648	0.000445523
WBGene00011212	R10E8.6	0.708157	0.000247036
WBGene00014821	R10E8.7	0.707921	0.000237493
WBGene00004120	pqn-32	0.705697	0.000442549
WBGene00000698	col-124	0.704311	1.99928e-07
WBGene00010752	K10G4.3	0.702543	0.000290994
WBGene00011176	R09E10.6	0.702412	0.0002411
WBGene00017478	F15A8.6	0.700843	1.80957e-07
WBGene00015716	sox-4	0.699342	0.000478339
WBGene00019320	K02E10.6	0.69849	0.000522031
WBGene00017340	F10D7.3	0.698427	2.61505e-10
WBGene00019615	K10B4.3	0.698239	2.74021e-08
WBGene00020329	bath-26	0.696679	0.000125465
WBGene00002299	let-23	0.695817	1.19803e-07
WBGene00004986	spp-1	0.69384	6.09294e-08
WBGene00022668	ZK154.6	0.693525	8.695e-08
WBGene00008220	C50B6.7	0.693167	5.34677e-05
WBGene00011335	T01E8.8	0.692979	0.000141696
WBGene00012634	Y38H6C.23	0.69254	4.29479e-06
WBGene00043995	F40F12.9	0.691973	0.000307517
WBGene00011756	ctg-2	0.69167	5.53928e-06
WBGene00016841	magu-3	0.690671	0.000370594
WBGene00006651	tts-2	0.689685	0.000643619
WBGene00018969	F56D3.1	0.68917	0.000437217
WBGene00006863	gyg-1	0.689151	1.74569e-05
WBGene00008519	cyp-13B1	0.688688	0.000423401
WBGene00002058	ifd-2	0.687749	0.000400399
WBGene00003828	nuc-1	0.687668	4.61945e-10
WBGene00000541	cln-3.3	0.686463	0.000638341
WBGene00194815	Y43F8B.23	0.686193	0.000657506
WBGene00017315	ugt-36	0.685883	0.00065674
WBGene00235306	W03D2.13	0.681201	0.000715964
WBGene00010835	M03B6.3	0.681043	0.000747401
WBGene00009982	F53F1.4	0.680523	9.43309e-05
WBGene00012253	clec-50	0.679912	6.57005e-06
WBGene00044418	C08G5.7	0.677385	0.000585824
WBGene00009595	F40F12.7	0.677372	1.13541e-07
WBGene00002274	lec-11	0.67725	3.13485e-09
WBGene00012273	W05B2.7	0.677208	0.000573872
WBGene00001828	hch-1	0.676749	0.00066838
WBGene00007414	C07E3.3	0.67617	5.31695e-06
WBGene00014164	lact-2	0.672719	6.70291e-07
WBGene00003653	nhr-63	0.671494	0.000364889
WBGene00003915	pan-1	0.671062	3.52826e-07
WBGene00021487	comt-3	0.670695	2.11332e-06
WBGene00022418	igcm-4	0.670144	5.87908e-06
WBGene00007368	C06B8.2	0.669277	0.000551883
WBGene00003604	nhr-5	0.668571	2.88708e-05
WBGene00004219	ptr-4	0.668058	0.000879917
WBGene00004300	ram-2	0.667395	0.00028413
WBGene00001065	dpy-3	0.666854	0.000967081
WBGene00009031	F21H7.5	0.666085	0.000393194
WBGene00022252	Y73B6BL.31	0.665056	5.04496e-07
WBGene00017823	F26D11.6	0.664953	0.000483247
WBGene00006987	zmp-1	0.660082	0.000734295
WBGene00000212	asm-2	0.659874	5.23139e-06
WBGene00015947	C18A11.1	0.659611	7.03176e-05
WBGene00016190	C28G1.5	0.658062	0.000778375
WBGene00021898	Y54G2A.36	0.658054	1.27605e-06
WBGene00021874	clec-81	0.657898	0.00074574
WBGene00022333	fbxa-27	0.657085	0.00103094
WBGene00009061	F22G12.1	0.656245	0.0006321
WBGene00012372	W09H1.1	0.65593	0.00100854
WBGene00021095	mlt-8	0.655786	0.000939793
WBGene00044296	F10C1.9	0.654095	0.000720045
WBGene00016757	C49A9.3	0.654009	0.00120519
WBGene00017726	F22H10.2	0.652507	5.05306e-05
WBGene00004144	pqn-60	0.65091	0.000694303
WBGene00004196	prx-11	0.648839	8.73778e-09
WBGene00009943	F52G2.3	0.648749	0.000462831
WBGene00013540	Y75B8A.3	0.648633	1.64668e-06
WBGene00018215	igcm-1	0.647231	0.00093141
WBGene00019022	F58A6.1	0.646257	0.000182259
WBGene00022751	ZK484.5	0.64556	0.000679632
WBGene00018984	F56F10.1	0.644044	4.49157e-09
WBGene00019272	H42K12.3	0.642832	0.00138833
WBGene00044743	C35B8.4	0.642719	0.000544876
WBGene00007748	C26E1.2	0.642678	3.2559e-05
WBGene00000981	dhs-18	0.642324	9.33997e-09
WBGene00017814	F26A10.2	0.641652	0.0012326
WBGene00004058	pmp-1	0.64164	6.29995e-06
WBGene00011263	R13H4.5	0.639429	0.000455155
WBGene00020788	nep-22	0.638612	2.6023e-06
WBGene00008486	ugt-44	0.63782	0.00037916
WBGene00016997	cebp-1	0.637518	1.61234e-07
WBGene00022797	best-24	0.636671	1.57369e-06
WBGene00018568	F47E1.4	0.636202	0.000185981
WBGene00010251	sta-2	0.636028	0.000213803
WBGene00010825	M01G12.14	0.634773	0.00147477
WBGene00006063	sto-1	0.634214	4.72056e-05
WBGene00000784	cpr-4	0.633987	1.83031e-06
WBGene00019970	R08F11.7	0.632592	0.00154388
WBGene00016860	cyp-33C9	0.631852	1.37597e-05
WBGene00019830	hrg-1	0.631328	2.26964e-05
WBGene00021895	clec-84	0.630846	7.2281e-06
WBGene00018594	aman-3	0.630735	9.03833e-05
WBGene00003978	pes-4	0.629736	4.82962e-05
WBGene00003435	msp-40	0.629105	0.000437338
WBGene00000039	acn-1	0.626418	0.00183556
WBGene00004198	prx-13	0.624539	1.54113e-06
WBGene00010660	K08D8.6	0.624284	7.01633e-05
WBGene00043065	C55C3.7	0.622701	0.000321488
WBGene00008498	F01D5.8	0.622483	0.00180379
WBGene00006444	shn-1	0.621667	1.60888e-06
WBGene00007574	C14B1.3	0.621658	2.56182e-07
WBGene00019540	K08D12.6	0.620453	5.14909e-07
WBGene00009657	F43G6.4	0.619459	0.000166486
WBGene00012624	fbxa-150	0.619275	0.000135479
WBGene00000228	atn-1	0.618589	9.94677e-12
WBGene00012255	lpr-6	0.61823	0.0018192
WBGene00002039	hum-6	0.618226	0.00071296
WBGene00007536	daf-36	0.618065	0.000176729
WBGene00011182	R09H10.5	0.617684	2.36537e-08
WBGene00016269	C30G4.4	0.616902	9.80925e-07
WBGene00012449	nhr-231	0.616801	0.00191037
WBGene00010658	K08D8.4	0.616003	0.000259537
WBGene00010453	fozi-1	0.615899	0.00129511
WBGene00013594	Y87G2A.2	0.615848	2.42255e-06
WBGene00045400	C54D10.13	0.613275	0.00238783
WBGene00000650	col-74	0.612519	0.00186954
WBGene00012450	Y17D7B.2	0.612373	0.00151118
WBGene00001403	fbl-1	0.611428	0.000142193
WBGene00013541	Y75B8A.4	0.611239	2.10807e-07
WBGene00008091	C44F1.1	0.610726	0.0018154
WBGene00003409	mrp-3	0.610614	4.62677e-05
WBGene00003705	nhr-115	0.610613	0.0019553
WBGene00017840	ttm-2	0.610494	0.000411699
WBGene00003640	nhr-50	0.610015	0.000417092
WBGene00001820	ham-1	0.608978	2.76472e-05
WBGene00002271	lec-8	0.608486	2.8306e-05
WBGene00013559	Y75B8A.28	0.607363	9.22864e-07
WBGene00009840	fbxa-189	0.606599	0.00118503
WBGene00006367	sym-2	0.605266	0.000703529
WBGene00010049	F54D5.3	0.604655	1.73625e-07
WBGene00018350	ifo-1	0.604481	0.000355194
WBGene00011838	T19C4.1	0.603984	0.00280078
WBGene00000220	atf-2	0.603862	0.00270245
WBGene00004023	pho-4	0.603544	2.54766e-05
WBGene00011978	T24B8.4	0.60352	1.49554e-07
WBGene00001699	grd-10	0.602297	0.00109223
WBGene00006775	unc-39	0.601724	0.00289791
WBGene00018724	F53A9.1	0.601048	6.84685e-06
WBGene00012444	Y15E3A.5	0.600996	3.61429e-05
WBGene00044623	bus-8	0.600903	0.00127211
WBGene00010633	nspd-2	0.600395	0.000842699
WBGene00012462	Y17G7B.8	0.599743	2.15321e-05
WBGene00008681	scrm-4	0.598382	2.07332e-06
WBGene00012781	nspd-7	0.598229	0.00267308
WBGene00013290	Y57G11A.2	0.597965	0.00125943
WBGene00000991	dhs-28	0.594321	1.45094e-11
WBGene00016766	C49C8.2	0.594189	0.00311316
WBGene00019859	R03H10.7	0.593375	0.00241267
WBGene00012886	Y45F10D.6	0.592728	0.000417375
WBGene00004236	ptr-22	0.592703	0.000504346
WBGene00000841	cul-6	0.589198	0.000179011
WBGene00006923	vhp-1	0.588441	3.92977e-10
WBGene00010790	sodh-1	0.587592	2.3717e-07
WBGene00021513	Y41D4B.6	0.586931	0.00286903
WBGene00003646	nhr-56	0.586917	0.00047512
WBGene00006056	sss-1	0.58643	0.00131789
WBGene00012134	T28F3.8	0.58476	1.59793e-05
WBGene00004237	ptr-23	0.584402	0.00081475
WBGene00004988	spp-3	0.58309	8.21187e-05
WBGene00018346	F42C5.4	0.582786	0.00204969
WBGene00007480	glna-1	0.582318	9.43999e-05
WBGene00022246	acp-7	0.582057	0.00012857
WBGene00001250	elt-2	0.580292	0.00248083
WBGene00014089	ZK822.1	0.580189	0.0035374
WBGene00004061	pmp-4	0.579817	2.42394e-05
WBGene00008105	C45B11.2	0.579798	0.00147089
WBGene00010749	K10D11.5	0.57948	0.00175652
WBGene00022816	fbn-1	0.579462	0.000695045
WBGene00195176	Y43F8B.24	0.578344	0.00373255
WBGene00008499	cyp-37A1	0.57832	1.45232e-05
WBGene00003707	nhr-117	0.577746	7.14348e-05
WBGene00016447	msd-4	0.577035	0.00178195
WBGene00009432	F35E12.8	0.576916	0.00416609
WBGene00020576	T19D12.1	0.576698	0.00359782
WBGene00000657	col-81	0.576304	0.00339329
WBGene00021160	gba-4	0.576027	0.00364814
WBGene00008851	F15B9.8	0.575881	0.00370226
WBGene00012529	Y32F6A.4	0.575643	0.000742418
WBGene00016505	ttr-33	0.57535	0.000347404
WBGene00003571	ncx-6	0.574765	0.00306077
WBGene00008831	F14H3.12	0.574488	0.00263934
WBGene00001559	gei-1	0.574404	5.30246e-05
WBGene00011214	R10E9.2	0.573269	0.00166699
WBGene00012005	jun-1	0.572925	9.16581e-09
WBGene00010724	K09E9.1	0.571671	0.000107084
WBGene00003561	ncr-1	0.570781	1.73239e-05
WBGene00138721	C54D10.14	0.57025	0.000555109
WBGene00044068	syd-9	0.569898	0.00197882
WBGene00000103	akt-2	0.569541	2.90807e-06
WBGene00003778	nnt-1	0.568854	5.33111e-05
WBGene00003457	msp-64	0.568708	0.0017798
WBGene00013197	ttm-5	0.568187	0.00175295
WBGene00022321	fbxa-25	0.567873	0.0025097
WBGene00010083	F55B11.1	0.567572	1.19715e-05
WBGene00001479	fmo-4	0.567347	0.000276855
WBGene00000072	add-1	0.567071	0.00418273
WBGene00014148	ZK909.3	0.566168	0.000305856
WBGene00017103	klo-2	0.564228	0.00263771
WBGene00009896	scl-3	0.563246	0.00165477
WBGene00011097	nhr-206	0.562127	0.00539011
WBGene00021354	fpn-1.1	0.560983	1.64366e-05
WBGene00021262	fbxa-74	0.560794	0.000722269
WBGene00016958	ilys-4	0.560679	0.000644915
WBGene00016663	C45E1.4	0.559941	0.00482511
WBGene00016048	C24B9.3	0.559147	8.26437e-07
WBGene00019644	cpt-4	0.55893	3.66763e-06
WBGene00016756	C49A9.2	0.558915	0.00274002
WBGene00019436	K06A9.2	0.557718	0.000511514
WBGene00010850	M04C3.1	0.557343	6.77924e-06
WBGene00011539	fbxa-135	0.557291	0.00316555
WBGene00018958	F56C11.6	0.557174	0.000101053
WBGene00001006	dlg-1	0.556941	3.17631e-05
WBGene00016064	acd-1	0.556881	0.00496193
WBGene00022412	Y102A11A.2	0.554818	0.00553826
WBGene00010605	K06G5.1	0.55348	2.14838e-08
WBGene00017542	F17E9.5	0.551872	0.00129118
WBGene00003956	pcp-1	0.551798	2.01267e-06
WBGene00000285	cal-1	0.550645	0.00118424
WBGene00022538	ZC190.4	0.55063	0.00597056
WBGene00013135	rga-2	0.550329	0.00344986
WBGene00009023	F21G4.1	0.549788	0.00456161
WBGene00013207	Y54G9A.4	0.549662	0.00365921
WBGene00013923	ghi-1	0.54903	0.00393418
WBGene00012226	W03G11.4	0.548872	0.000732538
WBGene00006538	tbb-4	0.548625	0.00663569
WBGene00016760	C49A9.6	0.547563	0.00218123
WBGene00013289	tag-273	0.547545	0.000145999
WBGene00001787	gst-39	0.546983	0.00130297
WBGene00018342	F42A10.6	0.546673	0.000574027
WBGene00003443	msp-50	0.54651	0.00343524
WBGene00006844	unc-120	0.546485	0.0024127
WBGene00043983	C39D10.11	0.545886	0.00485398
WBGene00021797	Y52E8A.4	0.545733	0.00101697
WBGene00007254	C01H6.4	0.545491	0.00549399
WBGene00018730	F53A9.7	0.545404	0.000462247
WBGene00013962	ZK287.1	0.544254	0.00708269
WBGene00012910	Y46G5A.20	0.54372	0.00273583
WBGene00011474	aldo-1	0.54352	7.02529e-09
WBGene00006852	unc-129	0.543161	0.00522914
WBGene00009877	F49C12.7	0.543109	8.44312e-05
WBGene00000215	asp-2	0.541967	1.86611e-10
WBGene00004949	sox-2	0.541339	0.00211941
WBGene00021865	fbxa-66	0.54064	0.00741458
WBGene00017901	igeg-1	0.539659	0.00568813
WBGene00015824	C16B8.4	0.539073	0.00550763
WBGene00045412	C25F9.12	0.537331	0.00783095
WBGene00003625	nhr-31	0.537195	0.00195763
WBGene00014666	C05D12.3	0.537175	4.66028e-05
WBGene00012622	Y38H6C.9	0.537015	0.00786917
WBGene00010877	lact-4	0.536418	0.000482776
WBGene00007404	best-5	0.536417	0.00634407
WBGene00044073	tag-244	0.536041	0.00646667
WBGene00008576	F08G2.4	0.535759	1.01428e-05
WBGene00012143	T28H10.2	0.535665	0.00393195
WBGene00007372	C06B8.7	0.534792	9.24995e-05
WBGene00008692	scav-4	0.534205	0.00816366
WBGene00006578	tli-1	0.532603	8.01439e-07
WBGene00004172	pqn-92	0.532383	0.00210669
WBGene00010189	F57B1.6	0.532278	0.00730193
WBGene00017637	F20D6.8	0.532263	0.00776244
WBGene00015280	C01B10.6	0.531893	4.50232e-08
WBGene00003516	nab-1	0.531573	0.00198094
WBGene00015949	C18A11.3	0.531357	0.00584565
WBGene00018682	aagr-4	0.531116	0.000206578
WBGene00007351	C05G5.5	0.530938	0.00688675
WBGene00044403	fbxa-219	0.530903	0.00262702
WBGene00019166	tat-2	0.530841	0.000315584
WBGene00019674	K12C11.3	0.53053	0.00728351
WBGene00022679	ZK180.5	0.530111	0.00683869
WBGene00018704	ztf-13	0.5301	0.000457431
WBGene00001475	fmi-1	0.529149	0.00674506
WBGene00017687	ets-4	0.528915	0.00048715
WBGene00018374	tag-343	0.527913	0.00149747
WBGene00022441	Y110A2AL.4	0.527688	0.00891411
WBGene00044291	C25F9.10	0.527009	0.0087647
WBGene00011531	rsbp-1	0.526972	0.000637697
WBGene00018266	nhr-183	0.526489	0.00357451
WBGene00011880	T21B6.3	0.526425	3.20327e-05
WBGene00021369	siah-1	0.526421	0.000147629
WBGene00013809	Y116A8C.33	0.526372	0.00919538
WBGene00000545	clp-4	0.525423	9.59902e-06
WBGene00013263	Y57A10A.23	0.52491	0.0050738
WBGene00017908	F28H1.1	0.524349	8.6401e-06
WBGene00004006	pgp-12	0.524274	0.00298256
WBGene00219216	K08D10.14	0.523932	0.00923421
WBGene00008605	mlt-9	0.523785	0.0060447
WBGene00013448	Y66D12A.24	0.523516	6.61601e-05
WBGene00000237	bam-2	0.522515	3.01014e-05
WBGene00019520	K08B12.1	0.522434	0.00521822
WBGene00004216	ptr-1	0.522328	0.0050944
WBGene00017781	F25E2.3	0.522271	0.00296472
WBGene00011429	T04C12.7	0.521541	0.00015149
WBGene00021873	clec-82	0.521282	0.00480308
WBGene00012980	efhd-1	0.521218	2.54967e-05
WBGene00003903	pab-2	0.520883	7.14606e-07
WBGene00021542	Y43B11AL.1	0.520812	0.00352048
WBGene00044238	C30H6.12	0.520536	0.00246018
WBGene00000671	col-96	0.520532	0.000188944
WBGene00003730	nhx-2	0.520112	0.00145341
WBGene00017184	ncam-1	0.520039	0.00210384
WBGene00007139	mnp-1	0.518882	0.00272847
WBGene00219838	C28H8.14	0.518496	0.000306354
WBGene00008944	F19B2.5	0.518246	2.16286e-05
WBGene00003444	msp-51	0.517547	0.00233174
WBGene00017154	ugt-57	0.517185	0.0104804
WBGene00015362	fbxa-105	0.516822	0.00648162
WBGene00008228	C50B8.6	0.516526	0.00808828
WBGene00021398	Y38C1AA.7	0.515478	0.00510811
WBGene00194703	F26B1.8	0.515471	0.00176418
WBGene00022033	Y65B4BL.1	0.514707	0.010258
WBGene00011328	T01D3.3	0.514696	0.0108133
WBGene00002069	ikb-1	0.513329	0.00011579
WBGene00019111	F59E11.5	0.513223	0.00165933
WBGene00018607	F48E3.8	0.512533	0.00166322
WBGene00007525	C11G10.1	0.512172	0.00406454
WBGene00002056	ifc-2	0.511884	0.000408212
WBGene00004898	snb-2	0.511693	0.000135516
WBGene00001778	gst-30	0.511638	0.0111723
WBGene00013489	Y69H2.14	0.511627	3.84426e-07
WBGene00004990	spp-5	0.51065	0.000152873
WBGene00021858	Y54F10BM.3	0.510106	0.00876929
WBGene00008515	F02C12.1	0.510058	8.56906e-05
WBGene00012810	Y43F8A.3	0.509789	0.00558108
WBGene00011345	dma-1	0.509706	0.0116649
WBGene00004104	pqn-13	0.509037	0.00817264
WBGene00019426	cutl-16	0.508744	0.010593
WBGene00020194	T03G6.1	0.508473	0.00893397
WBGene00008309	nhr-170	0.50839	0.0106401
WBGene00002041	hum-8	0.507738	1.73036e-05
WBGene00008936	F18E2.1	0.507454	5.13873e-05
WBGene00008598	spin-3	0.506418	0.00905932
WBGene00001000	dim-1	0.505337	4.55946e-07
WBGene00020847	cgr-1	0.505327	0.00178377
WBGene00008485	ugt-43	0.505257	0.011782
WBGene00010870	M05B5.2	0.504179	0.00518328
WBGene00013474	Y69E1A.2	0.503253	0.010092
WBGene00006947	wrt-1	0.502683	0.00555714
WBGene00010150	F56D5.6	0.502001	0.00119858
WBGene00019318	K02E10.4	0.501532	0.012806
WBGene00007307	C04G2.8	0.501243	0.0038401
WBGene00015476	C05D9.9	0.500674	0.00524026
WBGene00018760	irg-3	0.500313	0.00709359
WBGene00008567	F08A8.4	0.500134	5.4167e-05
WBGene00019619	asp-14	0.499738	5.60954e-05
WBGene00006815	unc-83	0.499333	4.38642e-05
WBGene00016281	C31B8.4	0.499184	0.00693741
WBGene00018174	F38B6.4	0.499142	0.00173418
WBGene00016614	trpp-12	0.49874	0.00183685
WBGene00017969	F32A5.3	0.498218	3.69949e-05
WBGene00007999	tag-297	0.497577	0.00843459
WBGene00020360	math-41	0.496595	0.011497
WBGene00005657	srr-6	0.49656	0.0136576
WBGene00007989	fipr-22	0.495116	0.00617198
WBGene00003694	nhr-104	0.494957	0.00107548
WBGene00002054	ifb-2	0.494765	5.37892e-07
WBGene00013079	ttr-26	0.494199	0.000453485
WBGene00003452	msp-59	0.493935	0.00605445
WBGene00007365	C06B3.6	0.493639	6.0836e-09
WBGene00001150	ech-1	0.493116	0.00809482
WBGene00021272	Y23H5B.1	0.492971	0.0104767
WBGene00004194	prx-5	0.492947	0.000363549
WBGene00009304	eva-1	0.49239	0.0144428
WBGene00015085	B0244.10	0.492373	0.0100679
WBGene00016866	coel-1	0.491595	3.32083e-05
WBGene00003593	nfm-1	0.491414	1.75651e-05
WBGene00014158	ZK938.1	0.491195	0.00385412
WBGene00010742	K10D6.2	0.490967	0.00865507
WBGene00001753	gst-5	0.490899	0.000498117
WBGene00044500	T19E7.6	0.490301	0.00126946
WBGene00013639	Y105C5A.15	0.490239	7.84686e-05
WBGene00020840	T27A3.4	0.490237	0.00549375
WBGene00000478	cfz-2	0.490146	0.00495287
WBGene00011364	T02B5.3	0.488339	0.00130452
WBGene00000785	cpr-5	0.48825	3.94819e-09
WBGene00003407	mrp-1	0.488065	1.36377e-05
WBGene00008255	C51E3.10	0.487886	0.014313
WBGene00004183	prk-2	0.487821	0.00293845
WBGene00015859	C16D9.4	0.487327	0.0141563
WBGene00008595	clec-56	0.487184	0.00277315
WBGene00018729	F53A9.6	0.487143	8.85207e-05
WBGene00007203	best-1	0.486931	0.0158272
WBGene00018351	F42G2.2	0.486884	0.00126915
WBGene00006585	tni-3	0.486578	9.76517e-05
WBGene00022754	nspd-1	0.486576	0.00946697
WBGene00003929	pat-2	0.486146	1.14832e-05
WBGene00013216	Y54G11A.7	0.4858	0.0004251
WBGene00017998	F33D4.6	0.485538	0.00669027
WBGene00045468	F08A8.8	0.485238	0.0142268
WBGene00021415	nsy-4	0.484889	0.0101495
WBGene00014046	clec-60	0.484012	0.00466728
WBGene00077757	E02H4.7	0.483926	0.00623289
WBGene00009842	igeg-2	0.483913	0.0141765
WBGene00020836	lgc-34	0.483799	0.00219847
WBGene00004267	rab-3	0.483606	0.0108871
WBGene00000983	dhs-20	0.483015	0.00813914
WBGene00003495	mup-2	0.482897	2.92309e-08
WBGene00020049	ttr-8	0.482785	0.00932772
WBGene00003369	mlc-1	0.482616	1.15354e-05
WBGene00015713	C12D12.1	0.482321	4.8155e-05
WBGene00000448	pros-1	0.482269	0.0159608
WBGene00017892	F28B4.3	0.482146	4.61903e-05
WBGene00017108	cyp-43A1	0.482098	0.000131482
WBGene00003450	msp-57	0.481785	0.00785275
WBGene00009797	F46G10.2	0.480491	0.000945368
WBGene00010873	trpa-2	0.480449	0.017422
WBGene00009162	F26E4.7	0.480182	0.00225427
WBGene00077525	C41G7.8	0.48017	0.0174307
WBGene00002253	lbp-1	0.479789	0.000845604
WBGene00002174	itx-1	0.479386	1.56909e-05
WBGene00010522	K03A11.5	0.478756	0.0167933
WBGene00015779	C14F11.2	0.478149	0.00862243
WBGene00010545	cbp-2	0.477955	0.000223982
WBGene00004133	abu-13	0.477729	0.00997867
WBGene00003982	pes-9	0.477603	7.90202e-09
WBGene00011508	T05H10.3	0.477421	0.0136592
WBGene00009503	F37A8.5	0.477372	0.00102891
WBGene00019612	gpcp-1	0.476753	0.00177154
WBGene00003933	pat-9	0.476724	0.0123411
WBGene00017639	F20D6.10	0.476388	0.0154582
WBGene00019115	nhr-195	0.476282	0.0173652
WBGene00011090	R07B7.6	0.476035	0.0122142
WBGene00001159	eff-1	0.475938	0.0184558
WBGene00021309	Y32G9B.1	0.475914	0.0183857
WBGene00013124	Y52B11A.4	0.475904	0.015298
WBGene00017386	nspd-5	0.475726	0.00338553
WBGene00006683	twk-31	0.475347	0.0179832
WBGene00006789	unc-54	0.474111	6.34943e-08
WBGene00009582	F40F9.5	0.474041	0.00176753
WBGene00001768	gst-20	0.473951	0.00399727
WBGene00001716	grl-7	0.473887	0.00512172
WBGene00004048	plx-2	0.473732	0.0133105
WBGene00006970	zag-1	0.473219	0.0176191
WBGene00018874	tag-234	0.473075	0.017515
WBGene00003632	nhr-42	0.472887	0.00560831
WBGene00001366	exc-5	0.472726	0.0016256
WBGene00000799	crn-6	0.472219	0.00321895
WBGene00020256	T05C3.6	0.472101	0.00736712
WBGene00005712	srv-1	0.471699	0.012401
WBGene00019273	H43E16.1	0.471611	0.0167891
WBGene00001702	grd-13	0.471578	0.015095
WBGene00017448	F14B8.6	0.471557	0.0107102
WBGene00003678	nhr-88	0.47148	3.66919e-07
WBGene00010421	H32K16.1	0.471376	0.0193777
WBGene00000370	ccg-1	0.470494	0.000160248
WBGene00077593	C49G7.12	0.470105	0.0152829
WBGene00004169	pqn-89	0.469916	0.00466146
WBGene00009637	nspc-13	0.469566	0.0141216
WBGene00012532	crp-1	0.469456	0.00867793
WBGene00019763	galt-1	0.469307	0.0163186
WBGene00011833	T19B10.5	0.469293	0.0132397
WBGene00017012	acs-22	0.469263	8.63389e-08
WBGene00022196	gpa-17	0.46917	0.0144157
WBGene00006762	unc-25	0.46883	0.000685015
WBGene00206489	F53F1.14	0.468552	0.0043264
WBGene00006807	unc-75	0.468323	0.0204706
WBGene00007070	ugt-49	0.46788	0.000516197
WBGene00006798	unc-64	0.46782	0.000339778
WBGene00020929	W02C12.2	0.46722	0.0203944
WBGene00018640	F49E10.2	0.467012	0.00529664
WBGene00012216	W02D9.10	0.466873	0.00213235
WBGene00008168	C48B4.3	0.466537	0.019444
WBGene00020053	R13A5.11	0.46636	0.0190472
WBGene00003762	nlp-24	0.465991	1.1432e-05
WBGene00023501	F11E6.11	0.465255	0.0119939
WBGene00016677	C45G9.6	0.465217	0.0042982
WBGene00001572	gei-15	0.465162	0.00371907
WBGene00015216	valv-1	0.465137	0.0185039
WBGene00008776	F13H10.5	0.464665	0.0122089
WBGene00019294	K02A6.3	0.464557	0.000997689
WBGene00017434	F13H8.1	0.464549	0.0208044
WBGene00009800	rrc-1	0.464438	0.0172028
WBGene00014213	ZK1073.1	0.464136	7.7376e-06
WBGene00009306	F32A7.5	0.463854	4.59325e-05
WBGene00019839	R02F11.1	0.463673	0.00889846
WBGene00017948	mth-1	0.463447	0.0147384
WBGene00013836	fbxa-29	0.462914	0.0200223
WBGene00017964	F31F7.1	0.462897	0.000411485
WBGene00001113	dur-1	0.462501	0.0029569
WBGene00006404	tag-10	0.462071	4.19876e-06
WBGene00000708	col-135	0.46197	5.89036e-05
WBGene00019902	R05G6.10	0.461242	0.00176085
WBGene00021469	Y39G10AR.11	0.461199	2.45032e-05
WBGene00016805	C50D2.1	0.460953	0.0130186
WBGene00011801	T16G1.7	0.460863	0.00327683
WBGene00003746	nlp-8	0.46037	0.00194231
WBGene00012185	W01F3.2	0.460202	0.000661247
WBGene00021876	Y54G2A.11	0.460052	1.67729e-06
WBGene00019489	K07E1.1	0.460047	0.00919558
WBGene00016071	C24H12.1	0.459419	0.0194421
WBGene00020192	T03F1.11	0.459151	0.00599005
WBGene00020339	ttr-59	0.459085	0.00943997
WBGene00015356	tag-278	0.459039	0.00512876
WBGene00019298	K02D7.1	0.458648	1.99095e-07
WBGene00019955	R08C7.12	0.458578	0.00397243
WBGene00013900	ugt-18	0.458493	0.0217673
WBGene00011763	T14B1.1	0.458228	0.0175091
WBGene00019599	K09H11.1	0.458153	1.87034e-05
WBGene00006787	unc-52	0.457895	2.47651e-05
WBGene00022410	Y97E10C.1	0.457783	0.0102841
WBGene00004249	pvf-1	0.457733	0.00133028
WBGene00007132	B0284.2	0.457648	0.00929221
WBGene00020740	T23F4.2	0.457388	0.000955257
WBGene00001123	dyf-7	0.456649	0.0238165
WBGene00045276	F18E3.13	0.456604	0.00224758
WBGene00002282	let-4	0.456542	0.0233977
WBGene00015472	C05D9.3	0.456	0.0064938
WBGene00021019	W04B5.2	0.45587	0.0199456
WBGene00003243	mig-10	0.455757	0.00105857
WBGene00018731	F53A9.8	0.455627	3.45193e-05
WBGene00002252	lat-2	0.455585	0.0236615
WBGene00001523	gbh-2	0.45525	0.0017822
WBGene00044332	clec-36	0.455231	0.0165272
WBGene00003589	nex-2	0.454539	0.00233619
WBGene00022180	Y71H2AM.15	0.454314	0.0245796
WBGene00007506	C10C5.2	0.454077	0.00789108
WBGene00012034	T26C5.4	0.45373	0.00870928
WBGene00011099	nhr-208	0.453655	0.0189872
WBGene00000738	col-165	0.453459	0.0200398
WBGene00015339	C02E7.6	0.453096	0.0120888
WBGene00015680	egal-1	0.453013	0.00018416
WBGene00021495	sqst-2	0.452333	0.0252138
WBGene00001544	gcy-19	0.452117	0.0153332
WBGene00007750	syg-2	0.451932	0.0182195
WBGene00007944	C34F6.10	0.451161	7.1203e-05
WBGene00010424	H36L18.2	0.451109	0.000339247
WBGene00003574	ncx-9	0.450739	0.0223519
WBGene00018407	F44B9.2	0.450722	0.00585372
WBGene00000089	aex-6	0.450694	0.011089
WBGene00003245	mig-13	0.450384	0.0108421
WBGene00000611	col-34	0.450303	0.00509998
WBGene00003767	nlp-29	0.449948	0.0021202
WBGene00021675	Y48G1BR.1	0.449941	0.00755971
WBGene00021050	W05H9.3	0.449881	9.55868e-07
WBGene00001517	gar-1	0.449822	0.0255639
WBGene00009560	psa-3	0.449593	0.0243762
WBGene00017841	F26G1.5	0.44956	0.0254855
WBGene00011984	T24C2.5	0.449224	0.0124749
WBGene00001581	gfi-1	0.447837	5.60824e-06
WBGene00012445	Y16B4A.2	0.447415	0.000745489
WBGene00018225	nep-14	0.447181	0.0131872
WBGene00003377	mls-2	0.446754	0.0212981
WBGene00011748	T13F2.9	0.44632	0.0108904
WBGene00019300	swt-1	0.446274	0.000105155
WBGene00012295	nmat-1	0.446262	0.013258
WBGene00018772	F53G12.4	0.446103	0.0272273
WBGene00017447	F14B8.5	0.445968	0.0169837
WBGene00000903	daf-7	0.445175	0.0101323
WBGene00022325	fbxa-5	0.445158	0.0265443
WBGene00009093	F23H12.3	0.444904	0.00867549
WBGene00001108	dsl-6	0.444832	0.0177314
WBGene00020554	T19A5.3	0.444747	0.0277203
WBGene00003766	nlp-28	0.443352	5.08071e-06
WBGene00017309	F09F9.4	0.443069	0.027648
WBGene00009743	sptf-1	0.442928	0.0184906
WBGene00021397	Y38C1AA.6	0.442413	0.00936632
WBGene00002497	let-268	0.441655	0.0082606
WBGene00018702	F52E4.5	0.441465	0.0255686
WBGene00077490	M03A1.8	0.441185	0.0287758
WBGene00003431	msp-33	0.440821	0.0122208
WBGene00011006	ugt-47	0.440792	0.000394632
WBGene00008100	C44H9.5	0.440695	0.00232067
WBGene00008622	F09C8.2	0.440582	2.23971e-05
WBGene00018696	pho-6	0.440399	0.0283711
WBGene00000036	ace-2	0.440166	0.00284556
WBGene00255375	F08B4.8	0.440125	0.00917369
WBGene00019875	mca-2	0.439483	0.000934596
WBGene00004809	skr-3	0.438426	0.00233555
WBGene00017335	F10D2.10	0.438353	0.0195985
WBGene00020146	got-1.2	0.438079	2.1963e-05
WBGene00010340	slcf-1	0.437975	0.0300896
WBGene00005931	fbxa-199	0.437903	0.0194523
WBGene00012306	W06F12.2	0.437849	0.00624186
WBGene00017865	F27D9.7	0.437707	0.018967
WBGene00009292	F31D4.5	0.437179	0.030365
WBGene00020340	T08B1.1	0.437141	0.00188746
WBGene00002248	lam-3	0.437072	0.00374633
WBGene00010644	K07G5.5	0.43672	0.0172268
WBGene00011524	T06D8.3	0.436585	0.0292484
WBGene00018340	anmt-2	0.436183	0.000520252
WBGene00017060	D2063.1	0.435375	0.0274091
WBGene00016030	C24A1.3	0.435372	0.00444526
WBGene00002187	kgb-1	0.435352	0.000817095
WBGene00010215	nhr-193	0.435241	0.0303877
WBGene00001976	hmg-11	0.435047	0.00301044
WBGene00009709	fbxa-144	0.434895	0.0227462
WBGene00000608	col-19	0.4347	0.000180642
WBGene00004174	abu-14	0.434476	0.0253655
WBGene00000503	cht-1	0.434298	5.38929e-05
WBGene00003553	nas-37	0.434012	0.000263802
WBGene00022486	fbxa-61	0.433978	0.0270373
WBGene00013331	Y57G11C.42	0.433774	0.0305825
WBGene00012186	mlt-11	0.433652	0.0222739
WBGene00012202	W02B12.4	0.43361	0.0192726
WBGene00001770	gst-22	0.433284	0.0153769
WBGene00012554	Y37D8A.16	0.433042	0.0176331
WBGene00007983	C36E8.4	0.432244	0.020234
WBGene00021020	W04B5.3	0.432176	0.000694685
WBGene00014136	ZK896.5	0.43171	0.031317
WBGene00019717	trx-3	0.431709	0.0287265
WBGene00011679	ucr-2.2	0.431168	0.000269176
WBGene00017971	F32A5.8	0.430915	0.0134072
WBGene00023415	F16C3.3	0.430893	0.0239091
WBGene00000932	dao-6	0.430843	0.0330075
WBGene00018304	agr-1	0.430831	0.0287849
WBGene00009094	F23H12.5	0.430672	0.025535
WBGene00019960	ztf-16	0.430608	0.00656592
WBGene00018376	F43C9.2	0.430534	0.00158537
WBGene00002048	ida-1	0.429859	1.79366e-05
WBGene00010320	F59B10.4	0.429766	0.0228351
WBGene00006462	tag-97	0.429374	0.0201665
WBGene00011578	npr-20	0.429317	0.0277458
WBGene00020152	nhr-211	0.429016	0.0298985
WBGene00015868	C16H3.3	0.428899	0.00331537
WBGene00003681	nhr-91	0.428891	0.0265435
WBGene00006416	sams-5	0.428872	0.0325755
WBGene00007170	B0393.5	0.428809	0.0337602
WBGene00009888	F49E2.5	0.428647	6.5477e-06
WBGene00015632	C09D4.1	0.428567	0.00222206
WBGene00006609	tre-3	0.428058	0.000905529
WBGene00008779	F14B4.1	0.427848	0.0271799
WBGene00003515	myo-3	0.427172	6.17862e-06
WBGene00008603	F09B9.4	0.426986	0.00450183
WBGene00015781	C14F11.6	0.426977	0.0305891
WBGene00021256	Y22D7AR.2	0.426972	0.0323709
WBGene00015152	B0348.2	0.426708	0.00684275
WBGene00011850	T20B3.1	0.426448	0.00455007
WBGene00013693	Y105E8B.9	0.426389	0.0247465
WBGene00016191	C28G1.6	0.425872	0.0250182
WBGene00000469	ces-2	0.425836	0.0350072
WBGene00011430	T04C12.8	0.425648	0.0194052
WBGene00007928	C34C12.9	0.425332	0.0241805
WBGene00017504	F16B4.2	0.425189	0.0213214
WBGene00008910	F17C8.3	0.425011	0.0328359
WBGene00004989	spp-4	0.424948	0.0090632
WBGene00009041	cut-3	0.424785	0.0264008
WBGene00007174	mboa-1	0.424618	0.0356355
WBGene00018334	cyp-33E2	0.424555	0.0272673
WBGene00009221	acs-2	0.424405	9.93997e-05
WBGene00003747	nlp-9	0.424324	0.0108949
WBGene00019751	M03D4.4	0.424275	0.0357648
WBGene00016133	C26B9.3	0.424055	0.0287553
WBGene00010001	F53F8.4	0.4236	0.013769
WBGene00019749	M03A8.3	0.423476	0.0324657
WBGene00015218	B0507.1	0.423072	0.013538
WBGene00019213	H20E11.1	0.422616	0.034963
WBGene00015561	C07A12.7	0.422229	0.000189243
WBGene00015684	C10G8.8	0.422138	0.000356402
WBGene00012533	fbxa-209	0.422048	0.0367644
WBGene00021079	W08A12.2	0.421971	0.000786154
WBGene00001724	grl-15	0.421816	0.0167461
WBGene00007260	olrn-1	0.421649	0.00945795
WBGene00000942	deb-1	0.421641	4.48645e-05
WBGene00007919	C34C6.7	0.421484	0.00440528
WBGene00020710	T23B3.2	0.420991	0.000421919
WBGene00019057	F58F9.3	0.42078	0.0371795
WBGene00013750	Y113G7A.13	0.420643	0.0373105
WBGene00016343	C33D12.2	0.42028	0.0171224
WBGene00002222	klp-11	0.42013	0.026064
WBGene00007653	cysl-1	0.420071	0.00406595
WBGene00008227	C50B8.5	0.419992	0.0364548
WBGene00012018	T25C12.3	0.41983	0.000328461
WBGene00020379	T09B4.5	0.419362	0.00230698
WBGene00044280	W02A2.9	0.419317	0.00296166
WBGene00006050	ssq-1	0.419305	0.0284491
WBGene00017657	F21C10.7	0.418717	0.00103402
WBGene00014252	ZK1320.2	0.418605	0.000124372
WBGene00045208	F13E9.15	0.418254	0.0125337
WBGene00015954	C18B2.3	0.417904	0.019397
WBGene00016330	C32E12.4	0.417889	0.000502399
WBGene00019113	F59E11.7	0.417731	0.0300855
WBGene00000516	cki-1	0.417591	0.0324755
WBGene00015688	C10G11.8	0.417392	0.0183149
WBGene00003003	lin-14	0.417095	0.0130279
WBGene00006140	str-81	0.417002	0.029406
WBGene00007698	qns-1	0.416907	2.20295e-05
WBGene00017867	slc-28.1	0.416828	0.0326776
WBGene00015756	C14C6.2	0.416683	0.000925636
WBGene00010342	F59F5.3	0.416273	0.0248613
WBGene00006331	sup-26	0.416248	7.80675e-05
WBGene00003000	lin-11	0.415906	0.033231
WBGene00019148	H03E18.1	0.415885	0.0391865
WBGene00017591	F19C7.1	0.415657	8.50267e-05
WBGene00008669	acs-14	0.41559	2.23027e-05
WBGene00018221	F40A3.6	0.41535	0.00932339
WBGene00004173	pqn-94	0.415239	0.00846291
WBGene00000732	col-159	0.415233	0.0090756
WBGene00022423	nhr-41	0.414725	0.0019568
WBGene00015805	C15H9.11	0.414512	0.0304009
WBGene00044553	T23B12.11	0.414325	0.0133089
WBGene00021039	W05F2.7	0.413998	0.0254614
WBGene00015382	C03B1.14	0.413621	0.038387
WBGene00015052	clec-52	0.413488	0.032608
WBGene00011083	glo-1	0.413482	0.0392475
WBGene00006771	tln-1	0.413441	4.16471e-06
WBGene00009839	fbxa-188	0.413225	0.0404979
WBGene00012814	Y43F8B.3	0.413163	0.0409217
WBGene00012548	Y37D8A.6	0.413144	0.00369191
WBGene00022010	catp-7	0.41305	7.35782e-05
WBGene00000674	col-99	0.413044	0.0270793
WBGene00045401	T26F2.3	0.41193	0.0353127
WBGene00013855	ZC116.3	0.411884	0.00859628
WBGene00002127	inx-5	0.411796	0.0095187
WBGene00003756	nlp-18	0.411719	0.0091701
WBGene00020806	T25F10.3	0.411427	0.00654535
WBGene00045399	Y47G6A.33	0.411226	0.00137578
WBGene00019944	R07G3.8	0.41112	0.0146346
WBGene00018256	cutl-28	0.411032	0.0312564
WBGene00015381	C03B1.13	0.410804	0.0110029
WBGene00011069	ceh-62	0.410643	0.0101337
WBGene00013899	ZC443.4	0.410363	0.0105835
WBGene00003567	ncx-2	0.410346	0.000225578
WBGene00013009	fbxc-23	0.410221	0.040141
WBGene00019014	F57C12.2	0.410045	0.0302019
WBGene00022346	Y82E9BR.13	0.410026	0.0416795
WBGene00196573	M163.16	0.409966	0.0365843
WBGene00020550	T17H7.1	0.409958	0.0280762
WBGene00019173	H08J11.2	0.409938	0.0110018
WBGene00004020	pho-1	0.409878	0.0074551
WBGene00010935	M163.1	0.409693	1.48305e-05
WBGene00000652	col-76	0.409618	0.0207374
WBGene00000401	cdh-9	0.409524	0.0347623
WBGene00016180	C28C12.4	0.409427	0.0090582
WBGene00011107	R07E3.6	0.409382	0.0357528
WBGene00006575	tir-1	0.40934	8.54386e-05
WBGene00016658	C45B2.1	0.409314	0.00081755
WBGene00000224	atgp-1	0.409141	0.000188278
WBGene00002011	hsp-12.2	0.408728	0.00208572
WBGene00020456	fbxa-60	0.408341	0.00292577
WBGene00017430	F13H6.1	0.408231	0.00128996
WBGene00044417	C08F1.11	0.408199	0.0395688
WBGene00003907	paf-2	0.407662	0.000851642
WBGene00022517	ZC123.1	0.407259	0.0206695
WBGene00007103	crm-1	0.407252	0.0013533
WBGene00003182	mef-2	0.406731	0.00830606
WBGene00002915	let-805	0.406596	0.000116267
WBGene00009578	F40F8.5	0.406246	4.38363e-05
WBGene00008958	F19H6.3	0.4061	0.0441997
WBGene00014159	arrd-4	0.40591	0.0351243
WBGene00010328	F59C6.11	0.405704	0.041156
WBGene00001127	dyf-11	0.4056	0.0340882
WBGene00016596	C42D4.3	0.405595	0.0125062
WBGene00002983	lgx-1	0.405431	0.0448238
WBGene00003242	mig-6	0.405418	1.79273e-05
WBGene00023500	C11H1.9	0.405166	0.0193423
WBGene00011520	nhr-213	0.405002	0.0449163
WBGene00008599	F09A5.2	0.404961	0.0428616
WBGene00016135	C26B9.6	0.404678	0.0425585
WBGene00011495	T05F1.11	0.404618	0.033903
WBGene00001760	gst-12	0.404546	0.0412163
WBGene00009393	clec-62	0.404377	0.00488331
WBGene00008610	F09C3.2	0.403866	0.00471174
WBGene00011736	T12D8.9	0.403576	0.000156308
WBGene00019477	K07C11.4	0.403484	0.0201033
WBGene00007553	C13G3.1	0.402962	0.0426218
WBGene00009886	F49E2.2	0.402694	0.00351436
WBGene00000301	cav-1	0.402649	0.00150938
WBGene00021726	bath-10	0.402316	0.0379003
WBGene00021519	Y41D4B.17	0.402304	0.0258745
WBGene00015332	tyr-1	0.401831	0.0012931
WBGene00012970	Y48A6B.9	0.401714	0.00613076
WBGene00003779	nob-1	0.401657	0.0397196
WBGene00011906	hsp-12.1	0.401612	0.0441545
WBGene00000904	daf-8	0.401471	0.000489077
WBGene00018470	F45E4.5	0.400818	0.0473284
WBGene00007266	C03A3.1	0.400611	0.0464846
WBGene00010290	F58H1.7	0.400085	0.0227067
WBGene00003772	nlr-1	0.399783	0.033143
WBGene00018384	F43C11.7	0.399763	0.0159903
WBGene00007482	C09F12.2	0.399467	0.0450267
WBGene00016034	C24A3.4	0.399435	0.0234261
WBGene00000961	dgn-1	0.399429	0.00328582
WBGene00002123	inx-1	0.3992	0.0267564
WBGene00017380	F11D5.1	0.399132	0.00547102
WBGene00007689	C18E9.9	0.398577	0.000283128
WBGene00006610	tre-4	0.39846	0.0475226
WBGene00019855	R03H10.2	0.398398	0.0486198
WBGene00018990	klf-1	0.397997	0.00450617
WBGene00006599	tpa-1	0.397808	0.00081453
WBGene00017529	F16G10.15	0.397782	0.0430493
WBGene00009101	F25B3.4	0.397272	0.0473986
WBGene00002067	ifp-1	0.396937	0.0391738
WBGene00050927	B0250.12	0.396905	0.0495368
WBGene00018237	F40F4.6	0.396898	0.000719693
WBGene00022615	ZC449.5	0.396819	0.00546266
WBGene00016456	C35E7.4	0.396581	0.0376284
WBGene00000169	aqp-1	0.396515	0.0102542
WBGene00011398	qdpr-1	0.396423	9.50254e-05
WBGene00019592	K09F6.9	0.396259	0.047772
WBGene00018869	F55C12.1	0.395927	6.93588e-05
WBGene00021190	Y14H12A.1	0.395891	0.0495068
WBGene00001646	gna-1	0.395881	0.0306818
WBGene00002181	kal-1	0.395532	0.0143537
WBGene00020972	trpl-2	0.395454	0.04796
WBGene00000463	ceh-43	0.395346	0.00693734
WBGene00017659	F21C10.10	0.395283	0.000167686
WBGene00020191	clec-53	0.395231	0.0373681
WBGene00003635	nhr-45	0.395087	0.00033409
WBGene00007913	cyp-36A1	0.394822	0.044782
WBGene00007898	C33D9.3	0.394782	0.0233456
WBGene00006584	tni-1	0.394328	0.028854
WBGene00012595	Y38E10A.17	0.394186	0.0258846
WBGene00018971	clec-67	0.394116	0.0455471
WBGene00022396	Y97E10AR.1	0.3939	0.0512968
WBGene00018606	F48E3.6	0.39378	0.0450514
WBGene00010059	F54E4.3	0.39374	0.0396919
WBGene00021834	mab-31	0.39354	0.0108135
WBGene00045316	C49F5.9	0.393285	0.0299252
WBGene00006666	twk-11	0.393076	0.0335013
WBGene00019205	kcc-2	0.392857	0.000168298
WBGene00000397	cdh-5	0.392841	0.0490847
WBGene00003657	nhr-67	0.392796	0.0504307
WBGene00004123	pqn-36	0.392579	0.0146362
WBGene00000779	cpn-3	0.392553	0.000164876
WBGene00017904	lim-8	0.392223	0.00878998
WBGene00019932	R07C12.2	0.391965	0.038673
WBGene00014137	clec-187	0.391886	0.0281537
WBGene00012989	Y48C3A.5	0.391267	0.0257414
WBGene00000616	col-39	0.391116	0.0409276
WBGene00017571	jmjd-3.1	0.391041	0.0346058
WBGene00011831	T19B10.2	0.390815	0.00400749
WBGene00001603	gln-2	0.390727	0.0156729
WBGene00018755	bcmo-2	0.390486	0.0153136
WBGene00007220	C01B9.1	0.390482	0.0508234
WBGene00016975	nhr-173	0.389874	0.026308
WBGene00016022	C23H3.9	0.389802	0.0510209
WBGene00013518	Y73F8A.5	0.389457	0.0533736
WBGene00018303	F41G3.10	0.389098	0.00386116
WBGene00000677	col-103	0.389023	0.000295587
WBGene00017302	F09F7.5	0.38897	0.0269054
WBGene00018737	F53B1.4	0.388722	0.0279473
WBGene00011522	srap-1	0.38868	0.00162654
WBGene00022487	fbxa-21	0.388392	0.0382151
WBGene00015107	B0280.13	0.388164	0.0398354
WBGene00019659	K11H12.3	0.387649	0.0316579
WBGene00018562	F47D12.6	0.387632	0.0469404
WBGene00008376	D1054.9	0.387276	0.0327483
WBGene00018354	F42G2.5	0.387011	0.0554377
WBGene00012467	arrd-8	0.386865	0.0481582
WBGene00021531	Y42G9A.1	0.386739	0.0215243
WBGene00007301	C04F12.7	0.386549	0.0302657
WBGene00016568	C41G11.1	0.386459	0.00354366
WBGene00007990	fipr-23	0.386458	0.0532809
WBGene00008971	F20C5.6	0.386394	0.0262957
WBGene00010128	F55G11.8	0.386369	0.0559069
WBGene00000726	col-153	0.386365	0.0378974
WBGene00001345	fos-1	0.386162	0.00300909
WBGene00008748	yap-1	0.386046	0.00107882
WBGene00003613	nhr-14	0.386014	0.00256331
WBGene00009033	F21H7.12	0.385929	0.054618
WBGene00013388	Y62F5A.10	0.385756	0.0543602
WBGene00001377	eya-1	0.385533	0.0261043
WBGene00008401	D2005.6	0.385155	0.056644
WBGene00018145	F37C4.5	0.385019	0.00414466
WBGene00014262	ZK1321.4	0.384887	0.000216595
WBGene00013898	ZC443.3	0.384589	0.000265445
WBGene00021645	Y47G6A.19	0.384388	0.00398308
WBGene00017866	stn-2	0.384071	0.0559727
WBGene00021322	Y34B4A.6	0.383909	0.000436325
WBGene00016438	C35B8.3	0.3839	0.00514278
WBGene00017851	F27C1.1	0.383335	0.033396
WBGene00004238	ptr-24	0.383058	0.00126697
WBGene00000425	ced-11	0.382991	0.0512448
WBGene00008628	ttr-21	0.382828	0.00443863
WBGene00017123	maoc-1	0.38279	0.0035445
WBGene00022283	lgc-27	0.382604	0.0583446
WBGene00007317	C05A9.2	0.382508	0.0482615
WBGene00013851	ZC101.1	0.38238	0.0518281
WBGene00020248	T05C1.1	0.382013	0.0538649
WBGene00000720	col-147	0.381881	0.0461534
WBGene00003233	mgl-2	0.381635	0.0158424
WBGene00022242	sfrp-1	0.381614	0.0587358
WBGene00006476	rhgf-2	0.381168	0.0143456
WBGene00010374	rga-5	0.381053	0.0175535
WBGene00009308	F32A11.3	0.380954	0.0544714
WBGene00014081	ZK795.1	0.3805	0.00746025
WBGene00013543	Y75B8A.6	0.380498	0.0361989
WBGene00003588	nex-1	0.380321	0.00187934
WBGene00000455	ceh-34	0.380158	0.0557702
WBGene00000066	act-4	0.380148	6.73173e-05
WBGene00010269	F58G1.7	0.380053	0.0595009
WBGene00010868	somi-1	0.379959	0.0145855
WBGene00006831	unc-104	0.379675	0.00248739
WBGene00016553	C40A11.10	0.379622	0.0596874
WBGene00006981	zig-4	0.379463	0.0528593
WBGene00004310	ras-1	0.379317	0.00646471
WBGene00011095	gana-1	0.379259	0.0299231
WBGene00011407	ppat-1	0.379239	0.0338033
WBGene00017443	F13H8.11	0.379158	0.0556561
WBGene00044767	T23B7.3	0.379111	0.0606679
WBGene00004235	ptr-21	0.378435	0.00107337
WBGene00007601	C15C6.2	0.378198	0.0408908
WBGene00006365	syg-1	0.378061	0.0514854
WBGene00017983	F32D1.3	0.377772	0.0604936
WBGene00017557	nep-11	0.37777	0.0149457
WBGene00008830	nhr-176	0.37757	0.042546
WBGene00011692	T10G3.1	0.377533	0.0125109
WBGene00016871	inso-1	0.377498	0.021839
WBGene00008102	C44H9.7	0.37748	0.0369456
WBGene00022314	Y77E11A.14	0.377439	0.0598271
WBGene00006914	vha-5	0.377251	0.000268581
WBGene00006814	unc-82	0.377185	0.00411242
WBGene00012032	T26C5.2	0.377065	0.0349596
WBGene00007758	C27A7.8	0.377028	0.0524185
WBGene00002990	lin-1	0.377007	0.00637458
WBGene00018572	lin-42	0.376741	0.0191954
WBGene00003143	max-1	0.376532	0.0394916
WBGene00007840	C31C9.6	0.376343	0.0589252
WBGene00003688	nhr-98	0.375851	0.0617965
WBGene00021134	W10G11.1	0.375554	0.0547622
WBGene00015537	C06E4.8	0.375461	0.0499943
WBGene00002163	ist-1	0.375403	0.0177825
WBGene00004771	sem-2	0.375297	0.00884113
WBGene00009811	F47B8.10	0.375174	0.0375403
WBGene00000238	bar-1	0.375084	0.0401673
WBGene00004156	pqn-74	0.375019	0.0601367
WBGene00002037	hum-4	0.374865	0.00454309
WBGene00019565	cyp-35A3	0.374629	0.0452807
WBGene00013312	hhat-2	0.374544	0.0627758
WBGene00219423	C23H5.15	0.37451	0.0638259
WBGene00008841	F15A4.6	0.374501	0.0138151
WBGene00009028	F21H7.2	0.374252	0.0501176
WBGene00001439	fkh-7	0.374185	0.00130696
WBGene00001680	gpb-2	0.374169	0.0241205
WBGene00006788	unc-53	0.373802	0.00197777
WBGene00015934	ceh-48	0.373742	0.0588014
WBGene00019738	clec-265	0.373738	0.0406461
WBGene00000792	crb-1	0.37336	0.0275088
WBGene00019732	M02D8.6	0.373309	0.0631156
WBGene00002233	kqt-1	0.373082	0.0513899
WBGene00008572	F08B12.4	0.373041	0.00019999
WBGene00016976	C56E10.3	0.372956	0.0618199
WBGene00004855	sma-1	0.372955	7.13313e-05
WBGene00021913	cec-8	0.372913	0.001516
WBGene00010830	M02G9.1	0.372714	0.0391596
WBGene00000211	asm-1	0.372678	0.0185172
WBGene00006769	unc-33	0.372639	0.00013657
WBGene00003175	mec-12	0.372586	0.00535764
WBGene00017795	F25F8.1	0.372171	0.0414347
WBGene00002266	lec-3	0.372112	0.0104744
WBGene00004830	slo-1	0.371997	0.0537409
WBGene00007197	B0513.5	0.371997	0.000679212
WBGene00020976	oac-51	0.371882	0.0478046
WBGene00016114	flp-27	0.37184	0.0520531
WBGene00006741	unc-1	0.371647	0.0449849
WBGene00012291	W06A7.2	0.371535	0.021556
WBGene00017727	F22H10.3	0.371516	0.00114629
WBGene00016539	madd-2	0.371514	0.019463
WBGene00017471	F14H12.3	0.371358	0.0246125
WBGene00008393	D1086.6	0.371328	0.000452221
WBGene00006663	twk-8	0.370952	0.0198312
WBGene00020865	T27E4.7	0.370833	0.0229831
WBGene00000870	cyd-1	0.370703	0.00516336
WBGene00013111	sta-1	0.370527	0.0127526
WBGene00012794	Y43E12A.2	0.370008	0.00873419
WBGene00016974	lron-15	0.370003	0.0644274
WBGene00009380	F34H10.3	0.369868	0.000184663
WBGene00013227	Y56A3A.6	0.36979	0.0188491
WBGene00013273	marc-5	0.369306	0.0375633
WBGene00018036	F35C8.5	0.369152	0.00891023
WBGene00020153	nhr-212	0.369089	0.0320549
WBGene00009884	F49C12.15	0.369026	0.0654239
WBGene00020577	T19D12.2	0.368972	0.0375489
WBGene00018742	F53B3.3	0.368889	0.0412397
WBGene00045392	F26D11.12	0.368851	0.0679907
WBGene00008929	F18A11.2	0.368828	0.0602049
WBGene00015966	C18C4.5	0.368584	0.00180964
WBGene00006530	tba-4	0.368583	0.00096791
WBGene00003618	nhr-19	0.36846	0.0250844
WBGene00011888	cutl-15	0.36843	0.0662819
WBGene00006777	unc-41	0.368271	0.0344118
WBGene00006363	syd-1	0.368233	0.067165
WBGene00006743	unc-3	0.36818	0.0599307
WBGene00006779	unc-43	0.368012	0.000311449
WBGene00022331	fbxa-19	0.367863	0.0654184
WBGene00003480	klf-3	0.367832	0.0615343
WBGene00006587	tnt-2	0.367816	4.6502e-06
WBGene00011285	ttr-28	0.367775	0.0555863
WBGene00007900	C33D9.6	0.367685	0.048897
WBGene00077521	maf-1	0.367645	0.0553211
WBGene00020222	fut-6	0.367582	0.0533587
WBGene00009397	clec-66	0.367566	0.0207625
WBGene00003562	ncr-2	0.367551	0.0601713
WBGene00011305	R186.1	0.367197	0.066851
WBGene00022859	ZK1193.3	0.367134	0.0555238
WBGene00019478	cri-2	0.36691	0.0123698
WBGene00015480	C05D10.4	0.366798	0.0138557
WBGene00015574	irg-1	0.366757	0.0653325
WBGene00015063	B0228.6	0.366611	0.0468993
WBGene00015081	B0244.6	0.366043	0.0442408
WBGene00016874	C52B11.5	0.365996	0.0107778
WBGene00006839	unc-115	0.365868	0.00119348
WBGene00020330	T07H6.1	0.365851	0.0633511
WBGene00018318	F41H10.5	0.365472	0.0472053
WBGene00009349	F32H5.3	0.365023	0.036942
WBGene00006592	dpy-31	0.364951	0.000492805
WBGene00000214	asp-1	0.364939	0.00014921
WBGene00006342	sup-37	0.364892	0.0068463
WBGene00001824	hbl-1	0.364769	0.0410124
WBGene00001208	egl-44	0.364473	0.000725579
WBGene00012668	Y39B6A.5	0.364452	0.0116086
WBGene00003411	mrp-5	0.363711	5.12919e-05
WBGene00019780	M60.4	0.363553	0.000334026
WBGene00008394	D1086.7	0.36321	0.00238537
WBGene00019742	nhr-202	0.363085	0.0294241
WBGene00015286	best-3	0.362875	0.0340731
WBGene00003623	nhr-25	0.36287	0.0680136
WBGene00077697	F58E6.13	0.362736	0.0426739
WBGene00019263	H35B03.1	0.362696	0.0187173
WBGene00010593	gsnl-1	0.362393	0.010263
WBGene00001578	ges-1	0.362026	0.00838631
WBGene00021909	Y55B1BL.1	0.361923	0.000876643
WBGene00021576	fbxc-51	0.361886	0.0304143
WBGene00012201	W02B12.1	0.361861	0.0185989
WBGene00019017	F57F4.4	0.361465	0.000257739
WBGene00006825	unc-96	0.361418	0.0119925
WBGene00019906	R05G9R.1	0.361405	0.0294833
WBGene00021371	nape-1	0.361367	0.029194
WBGene00008777	F13H10.6	0.361292	0.011612
WBGene00013852	hhat-1	0.360908	0.0492043
WBGene00044070	set-18	0.360613	0.0568734
WBGene00019029	F58B6.1	0.360599	0.0641779
WBGene00004363	ric-3	0.360386	0.0626187
WBGene00003941	pbo-1	0.360374	0.0137949
WBGene00017698	F22B7.9	0.360136	0.0349008
WBGene00013166	Y53F4B.20	0.360073	0.0644977
WBGene00019743	nhr-203	0.359998	0.0501787
WBGene00015956	C18B2.5	0.359988	0.000779044
WBGene00011530	T06D8.10	0.359714	0.0669508
WBGene00010010	gmeb-2	0.359597	0.0724022
WBGene00020506	dop-3	0.35957	0.0751048
WBGene00022160	Y71G12B.25	0.359382	0.0544503
WBGene00003371	mlc-3	0.359158	0.000314936
WBGene00002265	lec-2	0.359024	0.000163536
WBGene00020566	ttr-7	0.358708	0.0747808
WBGene00011026	R05D7.1	0.358126	0.06362
WBGene00009403	F35C11.4	0.358086	0.0759222
WBGene00019759	M03F4.6	0.357891	0.0765787
WBGene00002215	klc-2	0.357209	0.000129246
WBGene00008652	F10D11.6	0.357189	0.0727572
WBGene00000603	col-14	0.357148	0.0431193
WBGene00010722	K09E4.4	0.357085	0.0685777
WBGene00020358	math-39	0.35705	0.053729
WBGene00006978	zig-1	0.356908	0.036402
WBGene00019939	lips-17	0.356858	0.0695312
WBGene00020401	T10B11.5	0.356831	0.046891
WBGene00019117	nhr-144	0.356791	0.0744429
WBGene00003006	lin-17	0.356679	0.02608
WBGene00020516	T15B7.1	0.356615	0.00192529
WBGene00005271	srh-48	0.356538	0.0545846
WBGene00010925	M153.2	0.356499	0.0746209
WBGene00001177	egl-8	0.356495	0.000143466
WBGene00003634	nhr-44	0.35636	0.0718785
WBGene00018398	sptl-2	0.356269	0.0433479
WBGene00013480	egas-3	0.356083	0.0586007
WBGene00016758	C49A9.4	0.35583	0.0783023
WBGene00020732	T23E7.2	0.355436	0.000240346
WBGene00013013	clec-145	0.355365	0.0449531
WBGene00018716	F52H2.4	0.355046	0.0789586
WBGene00004057	pmk-3	0.355021	0.00709464
WBGene00016903	marc-4	0.354728	0.0586084
WBGene00023021	F32A5.9	0.354648	0.0673267
WBGene00009724	F45D3.4	0.354366	3.38287e-05
WBGene00000673	col-98	0.354287	0.0035277
WBGene00020833	T26C12.3	0.354125	0.0706258
WBGene00003649	nhr-59	0.353961	0.0764587
WBGene00001263	emb-9	0.353861	3.80917e-05
WBGene00020867	shc-2	0.35364	0.0223909
WBGene00006535	tba-9	0.353085	0.0542606
WBGene00016506	C37H5.2	0.353035	0.0279573
WBGene00021362	Y37E11AL.6	0.352996	0.0781523
WBGene00009781	F46C5.6	0.352965	0.0635547
WBGene00018035	sek-4	0.352956	0.0765526
WBGene00006824	unc-95	0.352888	0.0466156
WBGene00003893	ost-1	0.352676	0.000309287
WBGene00044779	T10H9.8	0.352602	0.0248354
WBGene00007282	clec-223	0.352488	0.00313788
WBGene00004904	snf-5	0.352437	0.0600362
WBGene00016266	idhg-2	0.352263	0.00742915
WBGene00019237	H24G06.1	0.352182	0.00295083
WBGene00044079	tag-241	0.352171	0.0142584
WBGene00007288	C04A11.5	0.35206	0.072407
WBGene00044338	nspc-3	0.351971	0.0814889
WBGene00004191	prx-1	0.351828	0.0423662
WBGene00009645	F42G10.1	0.351827	0.0173163
WBGene00022144	pghm-1	0.351772	0.00200923
WBGene00021204	fbxb-77	0.351724	0.0812825
WBGene00010148	F56D5.3	0.351588	0.0811009
WBGene00013145	cutl-2	0.351547	0.0691524
WBGene00003720	nhr-130	0.351478	0.0347692
WBGene00016782	phat-3	0.351426	0.0533587
WBGene00015169	B0403.5	0.351332	0.0760751
WBGene00002257	lbp-5	0.351216	0.0177582
WBGene00017065	D2092.4	0.351198	0.0102117
WBGene00020195	T03G6.3	0.351115	0.00469268
WBGene00003019	lin-33	0.350876	0.0682905
WBGene00020160	igcm-3	0.350838	0.0116118
WBGene00018485	F46C8.3	0.350776	0.0386953
WBGene00003565	ncs-3	0.350443	0.0775586
WBGene00013959	ZK265.7	0.350127	0.0812949
WBGene00021583	clec-72	0.350125	0.045434
WBGene00022201	Y71H10B.1	0.349833	0.000485938
WBGene00001707	grh-1	0.349669	0.0709733
WBGene00006652	ttx-1	0.349656	0.0639703
WBGene00007810	C29F7.1	0.349618	0.082347
WBGene00021148	W10G11.19	0.349555	0.0515563
WBGene00021448	Y39D8A.1	0.349406	0.0826709
WBGene00006780	unc-44	0.349317	0.000132159
WBGene00019285	cbn-1	0.349134	0.0738039
WBGene00022274	Y73E7A.8	0.349037	0.0693664
WBGene00004005	pgp-11	0.348998	0.0434913
WBGene00017381	ddr-2	0.348967	0.0835031
WBGene00009926	noah-2	0.348806	0.072913
WBGene00020678	T22B11.4	0.348606	0.00513538
WBGene00018257	F41B4.1	0.348267	0.0457675
WBGene00016542	C39H7.4	0.348262	0.063774
WBGene00016546	C40A11.3	0.348074	0.0828836
WBGene00020114	pde-4	0.347985	0.00115031
WBGene00206419	R106.5	0.347933	0.00867799
WBGene00015047	faah-1	0.34783	0.00172509
WBGene00009899	efl-3	0.347829	0.0193001
WBGene00021396	cutl-24	0.347725	0.046517
WBGene00001518	gar-2	0.347472	0.0802952
WBGene00000609	col-20	0.347463	0.000170623
WBGene00012144	T28H10.3	0.347436	0.000488729
WBGene00002182	kap-1	0.347281	0.0783219
WBGene00009405	F35C11.6	0.347196	0.0840419
WBGene00023408	cex-2	0.346835	0.0149467
WBGene00004910	snf-11	0.346681	0.0703234
WBGene00000172	aqp-4	0.346526	0.0809177
WBGene00019176	H10D12.2	0.345858	0.0595884
WBGene00003659	nhr-69	0.345697	0.0243607
WBGene00008726	F13A7.11	0.34567	0.0368366
WBGene00003991	pfn-3	0.345191	0.0519149
WBGene00015613	C08F1.10	0.345036	0.0465463
WBGene00000100	ajm-1	0.344929	0.000215783
WBGene00019435	K06A9.1	0.344845	0.0542281
WBGene00013560	zip-12	0.344539	0.0196174
WBGene00009803	F47B8.2	0.344527	0.0173767
WBGene00020808	T25F10.6	0.344483	0.000280445
WBGene00001532	gcy-5	0.344452	0.0267314
WBGene00013416	Y64G10A.7	0.344407	0.0610703
WBGene00020509	hex-1	0.344391	0.00141707
WBGene00016360	C33G8.2	0.344288	0.0243479
WBGene00019720	M01H9.4	0.344114	0.0673476
WBGene00020911	cpt-6	0.343946	0.000890384
WBGene00016645	C44C1.6	0.343907	0.0887275
WBGene00018951	F56C9.7	0.343551	0.00389995
WBGene00014135	ZK896.4	0.343296	0.0892375
WBGene00045239	Y49E10.29	0.34307	0.0422765
WBGene00010285	F58H1.2	0.342935	0.0400845
WBGene00009534	F38B7.3	0.342736	0.01901
WBGene00001570	gei-13	0.342303	0.0370931
WBGene00219770	linc-40	0.342099	0.0751209
WBGene00016918	C54E4.2	0.341993	0.00888934
WBGene00017423	F13C5.2	0.341687	0.00779796
WBGene00016379	C33H5.13	0.341475	0.0226473
WBGene00021128	W10C8.5	0.341374	0.00157689
WBGene00003001	lin-12	0.341208	0.0129092
WBGene00022860	ZK1193.4	0.341109	0.0889082
WBGene00014836	T09F5.12	0.340762	0.0442316
WBGene00003249	mig-18	0.340663	0.0729221
WBGene00045338	M01B2.13	0.340656	0.0850509
WBGene00017900	F28E10.1	0.340623	0.0251338
WBGene00011869	dod-6	0.340513	0.0039272
WBGene00011382	dop-5	0.340185	0.0889141
WBGene00019741	nhr-201	0.339663	0.0870683
WBGene00004854	slt-1	0.339622	0.0849375
WBGene00000037	ace-3	0.339539	0.0906166
WBGene00009396	clec-65	0.339514	0.000969345
WBGene00001172	egl-3	0.339358	0.000179912
WBGene00007817	C30F2.3	0.339332	0.0926072
WBGene00016146	C26F1.1	0.339228	0.0925351
WBGene00004059	pmp-2	0.33917	0.0063682
WBGene00000040	aco-1	0.339167	0.000444103
WBGene00011587	T07F10.1	0.33896	0.0113723
WBGene00019760	calu-1	0.338666	0.00114844
WBGene00044348	Y71G12B.31	0.338505	0.0939524
WBGene00019847	R03G5.6	0.338395	0.0273348
WBGene00001546	gcy-21	0.33822	0.0845231
WBGene00017861	F27D9.2	0.338106	0.0786092
WBGene00015115	B0286.1	0.338024	0.0811203
WBGene00003773	nlt-1	0.337998	0.0112635
WBGene00022612	ZC449.2	0.337818	0.0799171
WBGene00008596	clec-54	0.337777	0.0666809
WBGene00000476	cfi-1	0.337233	0.0946181
WBGene00003171	mec-7	0.336961	0.0384847
WBGene00001391	far-7	0.3366	0.0763405
WBGene00001444	flp-1	0.336572	0.0230013
WBGene00018184	F38E9.1	0.336562	0.00351986
WBGene00020846	T27A10.6	0.336414	0.0338004
WBGene00009089	jmjd-3.2	0.336254	0.0467703
WBGene00001330	eps-8	0.336225	0.0202923
WBGene00017716	F22F4.1	0.3362	0.0443144
WBGene00017744	fbxc-54	0.33612	0.0671582
WBGene00003850	odr-3	0.33603	0.0851258
WBGene00003808	npr-2	0.336003	0.0943388
WBGene00044469	clec-173	0.335712	0.0238584
WBGene00017747	F23F1.6	0.335696	0.0414688
WBGene00012217	W02H3.1	0.335693	0.0933548
WBGene00003878	pept-3	0.335524	0.020839
WBGene00004316	rbf-1	0.3354	0.0575363
WBGene00219699	linc-22	0.335135	0.0386916
WBGene00044292	F56D6.8	0.335012	0.0967886
WBGene00007552	C13C12.2	0.335001	0.0644488
WBGene00009384	F35B12.4	0.334922	0.0855182
WBGene00019686	K12H6.6	0.334921	0.000448403
WBGene00007302	C04F12.8	0.334847	0.0446812
WBGene00002827	let-653	0.334815	0.0528227
WBGene00015410	tbc-6	0.334743	0.0510035
WBGene00009259	hpo-34	0.33473	0.000225934
WBGene00007560	C14A4.9	0.334711	0.0216336
WBGene00021215	Y18H1A.11	0.334387	0.0977884
WBGene00014125	ZK863.8	0.334263	0.0523994
WBGene00006875	vab-9	0.334239	0.066584
WBGene00004119	pqn-31	0.334218	0.0174291
WBGene00021598	Y46E12BR.1	0.334037	0.0929244
WBGene00004719	sad-1	0.333936	0.086737
WBGene00010898	nphp-1	0.333531	0.0702332
WBGene00006865	slcf-2	0.333478	0.0944848
WBGene00003040	lin-59	0.333441	0.00083741
WBGene00022129	lron-11	0.333438	0.0451316
WBGene00010236	F58B4.3	0.33343	0.0802978
WBGene00021167	cyp-32B1	0.333224	0.0900173
WBGene00006423	asd-2	0.333202	0.0302424
WBGene00020368	ast-1	0.333193	0.0989571
WBGene00016422	noah-1	0.333056	0.0866047
WBGene00006602	tps-1	0.332824	0.00421164
WBGene00014181	ZK1010.8	0.332622	0.0964095
WBGene00003680	nhr-90	0.332469	0.0557949
WBGene00009947	F52H3.5	0.33207	0.0224758
WBGene00020317	pdf-1	0.331556	0.0124384
WBGene00018352	fbxc-20	0.331507	0.0557624
WBGene00013963	sulp-8	0.331491	0.0509462
WBGene00001441	fkh-9	0.331315	0.000860991
WBGene00000973	dhs-9	0.33126	0.00287489
WBGene00016706	C46C11.3	0.331068	0.0985256
WBGene00004131	pqn-44	0.330959	0.000685559
WBGene00009830	cutl-18	0.330523	0.0766457
WBGene00021237	crtc-1	0.330523	0.0158128
WBGene00013838	fbxa-31	0.3305	0.0742945
WBGene00013849	ZC84.6	0.330483	0.0727286
WBGene00021977	Y58A7A.3	0.330166	0.00780584
WBGene00018392	insc-1	0.329878	0.0948585
WBGene00007393	fbxa-157	0.32982	0.0949547
WBGene00020989	W03D8.8	0.329475	0.0313802
WBGene00000967	dhs-3	0.329455	0.00634903
WBGene00019591	fbxc-25	0.329318	0.0647274
WBGene00008916	clec-221	0.329169	0.102817
WBGene00022260	Y73C8B.3	0.329169	0.0197988
WBGene00004224	ptr-10	0.329153	0.101137
WBGene00020229	T05A8.3	0.329122	0.00707225
WBGene00003573	ncx-8	0.329057	0.0808747
WBGene00020800	zig-10	0.329051	0.102173
WBGene00020854	T27C4.1	0.328978	0.00271618
WBGene00001171	egl-2	0.328862	0.101174
WBGene00011261	nphp-4	0.328855	0.0903841
WBGene00007116	B0198.3	0.328683	0.0976261
WBGene00010705	cyp-14A1	0.328367	0.0946513
WBGene00009621	fipr-21	0.328239	0.000760797
WBGene00010488	K02A11.3	0.327612	0.0237736
WBGene00019958	R08E3.2	0.327462	0.083601
WBGene00018282	F41D9.2	0.326962	0.101924
WBGene00015547	ain-1	0.326937	0.001266
WBGene00007296	arrd-25	0.32688	0.0047981
WBGene00002273	lec-10	0.326848	0.00957668
WBGene00006614	trp-1	0.32681	0.103105
WBGene00013222	dmsr-6	0.326787	0.103191
WBGene00016781	C49G7.3	0.326712	0.00203651
WBGene00001063	dpy-1	0.326618	0.105865
WBGene00004862	sma-9	0.326576	0.000224178
WBGene00013904	ugt-6	0.326511	0.0892995
WBGene00220190	Y65B4BM.2	0.326497	0.0830832
WBGene00009660	F43G6.8	0.326452	0.0172671
WBGene00001466	flr-2	0.326382	0.10609
WBGene00011705	T11A5.6	0.326352	0.0900233
WBGene00001445	flp-2	0.325974	0.0872588
WBGene00001489	frm-2	0.325919	0.0285925
WBGene00000970	dhs-6	0.325733	0.000182281
WBGene00020104	R148.5	0.325637	0.00209114
WBGene00010008	F53H4.3	0.325506	0.106143
WBGene00019952	fbxb-74	0.325505	0.0721251
WBGene00010064	F54F7.2	0.32548	0.0241572
WBGene00009531	F38B2.4	0.325246	0.0062283
WBGene00007749	ceh-79	0.325223	0.0483384
WBGene00011181	R09H10.3	0.325008	0.0248625
WBGene00010838	M03C11.1	0.324925	0.0954529
WBGene00016314	C32D5.6	0.324902	0.00793181
WBGene00009350	F32H5.4	0.324881	0.104153
WBGene00000277	cab-1	0.324831	0.000745553
WBGene00003738	nid-1	0.324784	0.00238691
WBGene00014978	ZC47.8	0.324768	0.0930248
WBGene00022500	lfi-1	0.324726	0.00142958
WBGene00010893	cutl-9	0.324404	0.100326
WBGene00003996	pgp-2	0.324244	0.00054353
WBGene00019664	K11H12.8	0.324235	0.00205067
WBGene00008360	nspc-19	0.324205	0.104166
WBGene00017773	dct-6	0.324095	0.020653
WBGene00001945	his-71	0.324081	0.0115749
WBGene00015541	C06E7.4	0.323765	0.0497631
WBGene00011108	R07E3.7	0.323469	0.107709
WBGene00017576	cdh-8	0.323446	0.109181
WBGene00001858	hil-7	0.323308	0.0643123
WBGene00020661	smz-2	0.323185	0.0811559
WBGene00003163	mdl-1	0.323114	0.0493714
WBGene00018353	fbxa-182	0.32308	0.0455082
WBGene00017535	atf-8	0.322965	0.0672333
WBGene00019225	H22K11.2	0.322866	0.0355358
WBGene00003528	nas-9	0.322728	0.0374658
WBGene00004002	pgp-8	0.322691	0.0996895
WBGene00008666	F10G8.8	0.322685	0.0235993
WBGene00018763	F53F10.1	0.322424	0.102727
WBGene00012100	sipa-1	0.322156	0.0189919
WBGene00020230	nep-2	0.321978	0.018495
WBGene00008923	F17C11.12	0.321967	0.0582567
WBGene00008359	nspc-17	0.321941	0.108577
WBGene00015814	C16A3.10	0.321902	0.00107251
WBGene00000707	col-133	0.321743	0.0592189
WBGene00020205	arrd-1	0.321584	0.0377445
WBGene00014150	ZK909.6	0.321327	0.0689535
WBGene00077437	Y59H11AR.6	0.321222	0.0363678
WBGene00015955	C18B2.4	0.321064	0.00184771
WBGene00006453	tag-80	0.321052	0.0770785
WBGene00002263	lea-1	0.32086	0.0115621
WBGene00006982	zig-5	0.320715	0.0867657
WBGene00000908	daf-12	0.320549	0.0138295
WBGene00000971	dhs-7	0.320489	0.110295
WBGene00010897	lact-3	0.320469	0.00274891
WBGene00004227	ptr-13	0.320379	0.0128539
WBGene00011948	T23F1.5	0.320352	0.0680979
WBGene00018041	F35D2.3	0.320242	0.0942736
WBGene00019973	R09A1.3	0.320125	0.0324065
WBGene00001496	frm-10	0.320033	0.000307825
WBGene00001456	flp-13	0.319779	0.0538562
WBGene00019846	gpx-7	0.319605	0.0954327
WBGene00000958	dgk-1	0.319597	0.0749788
WBGene00021333	Y34D9A.8	0.319592	0.104303
WBGene00006594	tom-1	0.31959	0.0233698
WBGene00010262	F58E10.7	0.319477	0.0294435
WBGene00013860	ZC247.2	0.319096	0.103721
WBGene00010750	K10D11.6	0.318942	0.0884781
WBGene00017644	exc-9	0.318696	0.0679356
WBGene00019914	clec-150	0.318679	0.035199
WBGene00003709	nhr-119	0.318648	0.0201516
WBGene00012535	Y37A1A.2	0.318614	0.0568881
WBGene00021915	Y55D5A.1	0.318344	0.106743
WBGene00004233	ptr-19	0.317991	0.0733644
WBGene00004827	skr-21	0.317989	0.0578742
WBGene00016103	dpyd-1	0.317709	0.00199775
WBGene00007677	C18D4.8	0.317211	0.114302
WBGene00020245	T05B11.1	0.317	0.0587902
WBGene00020479	T13C2.3	0.316912	0.103194
WBGene00017197	F07C3.9	0.316837	0.0765415
WBGene00044269	dex-1	0.31681	0.0720971
WBGene00000458	ceh-37	0.316718	0.0405023
WBGene00020012	R11G1.6	0.316565	0.0296992
WBGene00021253	Y22D7AL.15	0.316537	0.0344831
WBGene00022389	pde-6	0.316502	0.0277049
WBGene00001620	glt-1	0.316479	0.00154233
WBGene00044660	fbxa-87	0.316296	0.0656314
WBGene00004296	rad-50	0.316261	0.00272188
WBGene00003400	dapk-1	0.316205	0.00696145
WBGene00001775	gst-27	0.315943	0.0142359
WBGene00020736	T23F2.3	0.315476	0.0679417
WBGene00002178	jnk-1	0.315386	0.118503
WBGene00021702	Y48G9A.9	0.315347	0.00975697
WBGene00003769	nlp-31	0.315305	0.11769
WBGene00010888	dlc-2	0.315193	0.0402492
WBGene00014152	ZK930.2	0.314968	0.0294768
WBGene00021320	Y34B4A.4	0.314698	0.0771433
WBGene00017294	F09E10.1	0.314648	0.0485976
WBGene00016403	grsp-3	0.314577	0.0998392
WBGene00077531	F40G9.15	0.314476	0.11395
WBGene00016611	bicd-1	0.314346	0.0106126
WBGene00000801	cars-2	0.314231	0.0952872
WBGene00003980	pes-7	0.314116	0.00943935
WBGene00012035	T26C5.5	0.314016	0.0998261
WBGene00020130	igcm-2	0.313994	0.0944581
WBGene00044078	tag-243	0.313945	0.112179
WBGene00001430	fkb-5	0.313901	0.0441227
WBGene00008020	C38H2.3	0.313848	0.0859739
WBGene00015247	B0545.4	0.313786	0.109788
WBGene00001055	dpf-2	0.313539	0.018945
WBGene00011554	T07A5.1	0.313437	0.109474
WBGene00019282	mps-2	0.313293	0.103464
WBGene00004157	pqn-75	0.313226	0.0199234
WBGene00021525	Y41D4B.26	0.313083	0.107423
WBGene00013895	ZC434.9	0.312997	0.0759787
WBGene00000170	aqp-2	0.312993	0.116392
WBGene00004856	sma-2	0.312973	0.107435
WBGene00013539	Y73F8A.35	0.312869	0.121013
WBGene00001898	his-24	0.312796	0.115338
WBGene00020895	T28D9.3	0.312787	0.0798333
WBGene00017133	EEED8.2	0.312734	0.0982467
WBGene00050943	ZC412.10	0.312663	0.114688
WBGene00013499	Y70G10A.3	0.312294	0.0235085
WBGene00004257	pxn-2	0.312089	0.102735
WBGene00006418	tag-38	0.311945	0.0523042
WBGene00044350	Y73B6BL.44	0.311918	0.0868883
WBGene00020688	T22D1.11	0.311316	0.118212
WBGene00021497	Y40C5A.4	0.31115	0.0474664
WBGene00006705	ubc-8	0.31107	0.00425497
WBGene00001685	gpd-3	0.310802	0.000141058
WBGene00002978	lev-11	0.310772	0.000685648
WBGene00020359	math-40	0.310766	0.105092
WBGene00008439	mfb-1	0.310696	0.00202309
WBGene00007801	trpa-1	0.310538	0.0932788
WBGene00022112	Y71F9AL.7	0.310484	0.0536842
WBGene00018865	F55A12.6	0.310343	0.0654719
WBGene00008743	F13D12.9	0.309899	0.0941142
WBGene00014153	vab-23	0.309789	0.12048
WBGene00015551	C06G3.5	0.30972	0.00310929
WBGene00008298	C54D10.3	0.309628	0.00304843
WBGene00019660	K11H12.4	0.309497	0.121982
WBGene00016119	C25H3.10	0.309334	0.0812412
WBGene00011824	T18D3.7	0.308924	0.0583705
WBGene00009361	F33E2.5	0.308876	0.0804628
WBGene00020393	T10B5.7	0.308875	0.00355087
WBGene00000906	daf-10	0.308872	0.11554
WBGene00020258	T05E7.1	0.308845	0.0787403
WBGene00008032	C39E9.8	0.308483	0.017628
WBGene00019617	K10C2.1	0.308412	0.00615971
WBGene00015110	B0281.3	0.308386	0.125593
WBGene00001189	egl-21	0.308154	0.00135374
WBGene00020561	T19C3.3	0.308021	0.126335
WBGene00012113	T28B8.1	0.307978	0.000525075
WBGene00012540	Y37A1B.7	0.307952	0.0257509
WBGene00001118	dyf-2	0.30793	0.100344
WBGene00219687	linc-12	0.307885	0.122283
WBGene00007728	C25F9.9	0.307577	0.121397
WBGene00003675	nhr-85	0.307534	0.125612
WBGene00017198	nhr-36	0.307419	0.12666
WBGene00002348	myo-1	0.307283	0.00313749
WBGene00001368	exc-7	0.30721	0.0364442
WBGene00003591	nex-4	0.307088	0.123166
WBGene00000984	dhs-21	0.307017	0.0303547
WBGene00020301	T07D1.2	0.306917	0.049674
WBGene00003845	odd-1	0.306907	0.121507
WBGene00017257	F08F1.3	0.306818	0.118616
WBGene00019404	K05B2.4	0.306357	0.0600166
WBGene00012911	acl-7	0.30614	0.00506401
WBGene00002179	jph-1	0.305978	0.0201868
WBGene00015116	B0286.3	0.305391	0.0433598
WBGene00006979	zig-2	0.305236	0.11933
WBGene00007934	C34E7.4	0.305229	0.0579496
WBGene00014051	spv-1	0.305029	0.0408554
WBGene00020985	W03D8.2	0.304914	0.130012
WBGene00004108	pqn-18	0.304698	0.0216343
WBGene00009818	acbp-3	0.304587	0.114507
WBGene00013515	Y73F4A.2	0.303992	0.064465
WBGene00004321	rcn-1	0.303741	0.013087
WBGene00015569	C07D10.5	0.303726	0.0500117
WBGene00001072	dpy-10	0.30355	0.0910869
WBGene00012813	Y43F8B.2	0.303195	0.00153155
WBGene00000835	cuc-1	0.303145	0.0171824
WBGene00011462	scl-22	0.303034	0.0593874
WBGene00019620	fah-1	0.303007	0.000803608
WBGene00018804	F54D10.3	0.302876	0.114455
WBGene00008760	F13E9.11	0.302771	0.107338
WBGene00008215	C49F8.3	0.302725	0.10465
WBGene00016595	C42D4.2	0.302724	0.0917178
WBGene00009063	F22G12.3	0.302594	0.11765
WBGene00003776	nmy-1	0.302559	0.000993754
WBGene00002280	let-2	0.302505	0.000927591
WBGene00012891	sorb-1	0.302327	0.0806836
WBGene00044379	F40H7.12	0.302188	0.0402259
WBGene00007142	ttr-18	0.302184	0.134671
WBGene00015993	C18H7.1	0.302144	0.0775382
WBGene00023417	swm-1	0.302108	0.0387715
WBGene00022307	Y77E11A.2	0.302069	0.0128944
WBGene00000526	clc-5	0.302058	0.126212
WBGene00000403	casy-1	0.302058	0.00280435
WBGene00003727	nhr-137	0.30169	0.123998
WBGene00044178	C30G7.4	0.301634	0.127117
WBGene00017834	F26F12.3	0.301554	0.00339729
WBGene00018226	F40B5.2	0.301528	0.00973896
WBGene00016599	C42D8.1	0.301493	0.0727068
WBGene00011404	T03F7.7	0.301459	0.0973091
WBGene00011723	T12A7.2	0.301451	0.0412741
WBGene00003877	pept-1	0.301369	0.0362316
WBGene00017654	F21C10.4	0.301133	0.136223
WBGene00021503	Y40D12A.2	0.300679	0.0613854
WBGene00013853	ZC116.1	0.300658	0.12849
WBGene00003597	nhl-1	0.300627	0.0146817
WBGene00000074	adm-2	0.300513	0.0291399
WBGene00015045	cyp-34A10	0.300433	0.107794
WBGene00018807	fbxa-146	0.300387	0.115465
WBGene00044770	C53C11.5	0.300308	0.135498
WBGene00010357	H03A11.2	0.300109	0.0347249
WBGene00012825	Y43F8C.3	0.300092	0.0199787
WBGene00016319	C32D5.12	0.300067	0.134367
WBGene00014505	T05E11.9	0.299901	0.0243695
WBGene00008226	C50B8.4	0.299666	0.134796
WBGene00019379	K04A8.10	0.299549	0.0992578
WBGene00008510	lipl-7	0.299421	0.0359515
WBGene00001076	dpy-17	0.29935	0.100563
WBGene00010901	M28.10	0.299128	0.0101539
WBGene00003763	nlp-25	0.299033	0.124986
WBGene00007877	C33A11.1	0.298911	0.0172826
WBGene00044724	R02E4.3	0.298908	0.105097
WBGene00009690	F44E5.3	0.29875	0.112418
WBGene00007511	C10C5.7	0.298705	0.139171
WBGene00016555	math-20	0.298665	0.139068
WBGene00008880	F16B12.4	0.29864	0.0300678
WBGene00013784	Y116A8C.3	0.298434	0.132073
WBGene00011955	cdka-1	0.298288	0.0913285
WBGene00001374	exp-2	0.298203	0.121224
WBGene00003890	osm-10	0.297828	0.139265
WBGene00003331	mir-238	0.297602	0.129186
WBGene00017506	F16B4.4	0.297579	0.00128268
WBGene00019100	F59B1.8	0.29752	0.0167035
WBGene00018519	F46H5.3	0.297487	0.000117279
WBGene00001328	epi-1	0.297449	0.00478654
WBGene00016289	lntl-1	0.297384	0.0520317
WBGene00006679	twk-26	0.297362	0.140765
WBGene00019699	math-34	0.297325	0.122327
WBGene00013149	Y53F4B.1	0.297231	0.138009
WBGene00021981	lgc-26	0.297199	0.117762
WBGene00006836	unc-112	0.296956	0.0091789
WBGene00043062	clec-80	0.296872	0.125475
WBGene00006039	ssp-10	0.296832	0.141913
WBGene00000977	dhs-14	0.296825	0.050091
WBGene00012261	lpr-3	0.296802	0.0745332
WBGene00003626	nhr-32	0.296794	0.04466
WBGene00011971	lron-9	0.29665	0.0353057
WBGene00013713	Y106G6G.4	0.296596	0.110828
WBGene00019277	sgcb-1	0.296361	0.138203
WBGene00001121	dyf-5	0.296084	0.10186
WBGene00000443	ceh-20	0.295959	0.0517044
WBGene00000286	cal-2	0.295862	0.0629717
WBGene00006754	unc-15	0.295706	0.000363811
WBGene00010012	saeg-1	0.295695	0.00464162
WBGene00018743	F53B3.5	0.295693	0.0611307
WBGene00006760	unc-23	0.295599	0.0294343
WBGene00020223	T05A7.6	0.295466	0.106491
WBGene00008273	C53B4.3	0.295405	0.111772
WBGene00022743	mlt-7	0.295374	0.0992916
WBGene00009717	dep-1	0.295365	0.0480193
WBGene00016749	C48E7.1	0.295169	0.0366533
WBGene00008033	spin-2	0.295099	0.0909873
WBGene00013455	ssu-2	0.295005	0.11342
WBGene00020200	T04A6.1	0.294679	0.0513233
WBGene00001817	haf-7	0.294678	0.0117019
WBGene00006309	sul-2	0.294629	0.129902
WBGene00007248	catp-4	0.294524	0.140482
WBGene00015969	glb-6	0.294488	0.136863
WBGene00016458	C35E7.6	0.294074	0.0877522
WBGene00014021	svop-1	0.294023	0.109663
WBGene00017663	F21D12.3	0.293939	0.0137491
WBGene00009529	F38B2.2	0.293396	0.136877
WBGene00013869	ZC373.4	0.2932	0.0252598
WBGene00001958	hlh-14	0.293131	0.142886
WBGene00002137	inx-15	0.292804	0.070508
WBGene00018005	F33D11.8	0.292774	0.129367
WBGene00008548	F07A11.5	0.292624	0.118001
WBGene00004114	pqn-25	0.292519	0.13854
WBGene00000111	alh-5	0.292343	0.0588763
WBGene00011141	R08B4.5	0.292249	0.134537
WBGene00019018	abts-3	0.292078	0.0359281
WBGene00011974	xbx-5	0.291786	0.145101
WBGene00044330	alr-1	0.291786	0.133059
WBGene00003931	pat-4	0.291304	0.0228427
WBGene00006438	nrfl-1	0.291302	0.00385572
WBGene00006811	unc-79	0.291287	0.115008
WBGene00017039	trk-1	0.291199	0.146295
WBGene00022285	Y75B7AL.2	0.291054	0.149829
WBGene00017243	F08C6.5	0.291004	0.138022
WBGene00015284	C01B10.10	0.290971	0.0926004
WBGene00012289	W05H12.1	0.290797	0.0971977
WBGene00003514	myo-2	0.290792	0.00345956
WBGene00021446	hlh-33	0.290663	0.0939876
WBGene00019994	cdh-1	0.290587	0.0831716
WBGene00006757	unc-18	0.290556	0.00255703
WBGene00004145	pqn-62	0.290411	0.134599
WBGene00009640	nspc-10	0.290264	0.0682043
WBGene00007650	ugt-23	0.290124	0.0622817
WBGene00006745	unc-5	0.290108	0.0353527
WBGene00015767	hex-2	0.290079	0.0981973
WBGene00017640	F20D6.11	0.29005	0.0387617
WBGene00003370	mlc-2	0.289945	0.00240553
WBGene00003579	ndx-2	0.289746	0.149441
WBGene00001105	dsl-3	0.289708	0.147475
WBGene00007685	C18E9.5	0.289443	0.0667164
WBGene00011852	clec-26	0.289434	0.136251
WBGene00004751	sea-2	0.289357	0.0043332
WBGene00014848	VM106R.1	0.28919	0.123713
WBGene00003686	nhr-96	0.289169	0.0760139
WBGene00007981	glb-11	0.289112	0.128211
WBGene00011019	R05A10.2	0.288945	0.103986
WBGene00022329	fbxa-79	0.288944	0.101876
WBGene00017089	poml-2	0.288856	0.143474
WBGene00004924	snt-4	0.288842	0.013185
WBGene00011475	T05D4.2	0.288823	0.0400255
WBGene00006786	unc-51	0.288771	0.00619066
WBGene00006818	unc-86	0.288738	0.140875
WBGene00006424	ctbp-1	0.288693	0.150271
WBGene00000853	cut-6	0.288671	0.12678
WBGene00009959	F53B6.4	0.288385	0.143178
WBGene00009722	F45D3.2	0.288376	0.145071
WBGene00010703	K09A9.6	0.28825	0.0894306
WBGene00003722	nhr-132	0.288221	0.123587
WBGene00011927	T22C8.6	0.288143	0.151523
WBGene00001184	egl-15	0.288064	0.0711175
WBGene00086568	Y2H9A.6	0.287697	0.11672
WBGene00015293	C01C4.3	0.287303	0.0692464
WBGene00002247	lam-1	0.287293	0.00368477
WBGene00001690	grd-1	0.287214	0.152136
WBGene00010558	ptp-4	0.287166	0.153767
WBGene00022499	set-30	0.287142	0.110421
WBGene00008566	F08A8.3	0.286862	0.0816493
WBGene00000531	clh-4	0.2867	0.154842
WBGene00018024	F35A5.1	0.286615	0.0202174
WBGene00021643	Y47G6A.17	0.286551	0.142778
WBGene00003753	nlp-15	0.286233	0.0716497
WBGene00000441	ceh-18	0.286173	0.08146
WBGene00000920	daf-28	0.286021	0.156046
WBGene00013364	Y60A3A.16	0.285839	0.142599
WBGene00004423	rpl-11.2	0.285466	0.00210207
WBGene00001480	fmo-5	0.285339	0.0284858
WBGene00013404	fbxb-101	0.285293	0.148229
WBGene00006380	tab-1	0.285179	0.107738
WBGene00006543	tbx-2	0.285078	0.0978384
WBGene00003843	oct-2	0.284821	0.10253
WBGene00020390	T10B5.4	0.284781	0.158244
WBGene00017510	nhr-178	0.284671	0.0947982
WBGene00016996	D1005.2	0.284668	0.145616
WBGene00006801	unc-68	0.284447	0.00262623
WBGene00018281	tbc-18	0.284229	0.135407
WBGene00022813	ZK742.3	0.284131	0.137255
WBGene00005018	sqt-3	0.284077	0.0989837
WBGene00016549	C40A11.6	0.284	0.158194
WBGene00017299	molo-1	0.283952	0.150421
WBGene00009387	glb-15	0.283757	0.158943
WBGene00007347	C05G5.1	0.283744	0.138253
WBGene00013418	Y65A5A.1	0.283724	0.158176
WBGene00004509	rrf-2	0.283646	0.0421247
WBGene00002057	ifd-1	0.283513	0.131546
WBGene00012854	Y44A6D.3	0.283289	0.0711763
WBGene00004017	phg-1	0.283278	0.0903634
WBGene00020015	nhr-210	0.283221	0.158106
WBGene00022349	Y82E9BR.17	0.283205	0.10841
WBGene00019917	clec-43	0.282689	0.161528
WBGene00000081	ads-1	0.282486	0.001349
WBGene00009511	F37H8.2	0.282465	0.149837
WBGene00013008	clec-146	0.282459	0.103749
WBGene00018758	F53E10.1	0.282192	0.0279294
WBGene00006582	tmd-2	0.282144	0.0539575
WBGene00044209	Y32F6A.6	0.282038	0.103385
WBGene00015777	sfxn-2	0.281859	0.0642287
WBGene00000086	aex-3	0.281841	0.101461
WBGene00011424	dhs-31	0.281682	0.149919
WBGene00002152	iars-1	0.281471	0.0139071
WBGene00020862	fip-2	0.281337	0.0213258
WBGene00009969	F53B7.7	0.28104	0.142899
WBGene00019468	K07B1.8	0.281002	0.059367
WBGene00043702	Y54G2A.7	0.280931	0.164503
WBGene00020504	svh-2	0.280929	0.00435362
WBGene00014233	ZK1128.7	0.280815	0.0488801
WBGene00021430	Y38F2AR.12	0.280776	0.0191513
WBGene00022100	Y69A2AR.31	0.280751	0.129306
WBGene00008820	F14F11.2	0.280693	0.113691
WBGene00011227	R11.2	0.280407	0.162706
WBGene00017788	F25E5.7	0.28037	0.145658
WBGene00044383	T05A7.11	0.280296	0.127821
WBGene00015298	C01F1.3	0.280276	0.0514502
WBGene00013082	grdn-1	0.280128	0.04972
WBGene00006984	zig-7	0.279952	0.0391243
WBGene00004347	rgs-4	0.279867	0.128939
WBGene00045475	T07A5.7	0.279776	0.154862
WBGene00008783	F14B6.2	0.279612	0.140423
WBGene00020010	R11G1.1	0.279571	0.160544
WBGene00001774	gst-26	0.279474	0.0796088
WBGene00022647	slc-17.1	0.279295	0.131136
WBGene00012588	lips-16	0.279163	0.155051
WBGene00004951	spc-1	0.279019	0.0024473
WBGene00004740	scd-2	0.27886	0.133703
WBGene00001210	egl-46	0.27874	0.0991325
WBGene00000294	cas-1	0.278739	0.0130279
WBGene00022523	ZC132.4	0.278564	0.160372
WBGene00045275	F18E3.12	0.278547	0.0424186
WBGene00006840	unc-116	0.278371	0.00801254
WBGene00003813	nrf-6	0.278342	0.0113087
WBGene00022789	lron-2	0.277973	0.109987
WBGene00004438	rpl-25.1	0.27797	0.00182068
WBGene00012125	T28D6.5	0.277936	0.0349512
WBGene00195043	Y57G11C.1135	0.277866	0.166848
WBGene00001458	flp-15	0.277731	0.102114
WBGene00021927	Y55F3AM.10	0.277672	0.153419
WBGene00000477	cft-1	0.277619	0.163479
WBGene00016004	C18H9.6	0.277557	0.0324786
WBGene00020158	T02C5.1	0.277236	0.00105377
WBGene00016848	klo-1	0.277235	0.0754496
WBGene00012279	W05B10.4	0.277181	0.165081
WBGene00021557	Y45G5AM.5	0.277169	0.117977
WBGene00044756	F58F12.4	0.27707	0.167344
WBGene00015197	B0454.6	0.276852	0.0333049
WBGene00011291	R102.4	0.276822	0.047227
WBGene00013897	ZC443.2	0.276817	0.140502
WBGene00000857	cwn-1	0.276612	0.153154
WBGene00010613	K07A1.6	0.27658	0.0735177
WBGene00015303	rga-6	0.276563	0.170448
WBGene00011772	T14G8.4	0.276557	0.170847
WBGene00018214	F39H12.3	0.276481	0.0609119
WBGene00013415	Y64G10A.6	0.276429	0.0999248
WBGene00006778	unc-42	0.2763	0.13916
WBGene00008229	C50F4.1	0.276198	0.0798268
WBGene00008496	F01D5.6	0.276059	0.0954633
WBGene00189995	C06E7.88	0.276014	0.0708458
WBGene00220094	T25C12.12	0.27593	0.166448
WBGene00003710	nhr-120	0.275862	0.105528
WBGene00018242	F40G9.6	0.275737	0.16224
WBGene00019705	fbxb-45	0.275718	0.171333
WBGene00002084	ins-1	0.275535	0.168487
WBGene00013762	Y113G7B.12	0.275275	0.172832
WBGene00015137	B0310.1	0.275266	0.159256
WBGene00000068	acy-1	0.275207	0.116942
WBGene00005647	srp-6	0.274902	0.0437058
WBGene00000989	dhs-26	0.274688	0.149252
WBGene00007275	C03D6.1	0.274314	0.174349
[truncated: 10,339 more rows]
