# Supplementary material for: An intestinal microRNA modulates the homeostatic adaptation to chronic oxidative stress in C. elegans
Source: Aging (Albany NY). 2016 Sep 12;8(9):1979–96. doi: 10.18632/aging.101029 (PMC5076448; doi:10.18632/aging.101029)
Supplement: Supplementary file 5 [file aging-08-1979-s005.xlsx]

## Sheet: S4_GSEA
GO_Category	GO ID	GO Term	Genes	Fold Enrichment	Count	% (hit in total input)	P-Value
Biological Process	GO:0030258	lipid modification	ugt-2, ugt-36, ugt-1, F58F9.7, ugt-16, F59F4.1, acox-1, ugt-44, ugt-28	5.96802	9	1.78218	0.000111209
Biological Process	GO:0006508	proteolysis	skr-5, asp-10, cpt-3, nep-22, asp-8, pgp-9, skr-4, acn-1, cpr-3, cpr-4, F19C7.2, cul-6, asp-13, cpt-5, nep-17, hch-1, pcp-3, K10B2.2, F56F10.1, F53A9.2, F53A9.1, K12H4.7, W07B8.1, Y75B8A.4, asp-17, asp-5, zmp-1, C08F11.7	2.06585	28	5.34653	0.000511745
Biological Process	GO:0008340	determination of adult life span	ugt-1, lys-7, spp-1, nuc-1, fat-7, ftn-1, nipi-3, dod-24, dod-3, elo-2, sodh-1, ctl-1, ctl-2, asah-1, alp-1, cln-3.3	2.61971	16	3.16832	0.00110748
Biological Process	GO:0007568	aging	ugt-1, lys-7, spp-1, nuc-1, fat-7, ftn-1, nipi-3, dod-24, dod-3, elo-2, sodh-1, ctl-1, ctl-2, asah-1, alp-1, cln-3.3	2.61971	16	3.16832	0.00110748
Biological Process	GO:0010259	multicellular organismal aging	ugt-1, lys-7, spp-1, nuc-1, fat-7, ftn-1, nipi-3, dod-24, dod-3, elo-2, sodh-1, ctl-1, ctl-2, asah-1, alp-1, cln-3.3	2.61971	16	3.16832	0.00110748
Biological Process	GO:0006952	defense response	nipi-3, T19D12.4, C49C3.9, pqm-1, vhp-1, F08G5.6, prx-11, pgp-3	4.61296	8	1.58416	0.00159711
Biological Process	GO:0055114	oxidation reduction	cyp-14A5, cyp-25A1, F10D7.3, cyp-13B1, F10E9.12, DC2.5, fat-7, daf-36, cyp-37B1, dhs-28, cyp-34A2, sodh-1, ctl-1, ctl-2, cyp-14A2, cyp-33C9, cyp-33C8, cyp-13A5, cyp-33C7, dhrs-4, fmo-1	2.08308	21	3.9604	0.00316853
Biological Process	GO:0030259	lipid glycosylation	ugt-2, ugt-36, ugt-1, ugt-16, ugt-44, ugt-28	5.42547	6	1.18812	0.00457152
Biological Process	GO:0044242	cellular lipid catabolic process	F58F9.7, asm-2, F59F4.1, acox-1	8.37617	4	0.792079	0.0111058
Biological Process	GO:0006635	fatty acid beta-oxidation	F58F9.7, F59F4.1, acox-1	11.936	3	0.594059	0.0245322
Biological Process	GO:0031589	cell-substrate adhesion	K03H1.5, R09E10.5, F54D1.6	11.936	3	0.594059	0.0245322
Biological Process	GO:0009062	fatty acid catabolic process	F58F9.7, F59F4.1, acox-1	11.936	3	0.594059	0.0245322
Biological Process	GO:0007160	cell-matrix adhesion	K03H1.5, R09E10.5, F54D1.6	11.936	3	0.594059	0.0245322
Biological Process	GO:0006631	fatty acid metabolic process	F58F9.7, F59F4.1, acox-1, F56F10.1, asp-13, fat-7	4.23264	6	0.990099	0.0292972
Biological Process	GO:0034440	lipid oxidation	F58F9.7, F59F4.1, acox-1	10.8509	3	0.594059	0.029497
Biological Process	GO:0019395	fatty acid oxidation	F58F9.7, F59F4.1, acox-1	10.8509	3	0.594059	0.029497
Biological Process	GO:0040018	positive regulation of multicellular organism growth	grd-10, wrt-2, pha-4, best-24, sma-5, ptr-22, ptr-4, acn-1, DC2.5, nipi-3, glf-1, CE7X_3.2, cyp-13A5, clec-1, dhrs-4, ifd-2	1.85342	16	2.9703	0.0308266
Biological Process	GO:0016042	lipid catabolic process	F58F9.7, asm-2, F59F4.1, acox-1, Y69A2AL.2	4.05988	5	0.990099	0.0334976
Biological Process	GO:0051240	positive regulation of multicellular organismal process	grd-10, wrt-2, pha-4, best-24, sma-5, ptr-22, ptr-4, acn-1, DC2.5, nipi-3, glf-1, CE7X_3.2, cyp-13A5, clec-1, dhrs-4, ifd-2	1.80849	16	2.9703	0.0368186
Biological Process	GO:0016054	organic acid catabolic process	F58F9.7, F59F4.1, acox-1, C09F9.2	4.42076	4	0.792079	0.0601626
Biological Process	GO:0046395	carboxylic acid catabolic process	F58F9.7, F59F4.1, acox-1, C09F9.2	4.42076	4	0.792079	0.0601626
Biological Process	GO:0040014	regulation of multicellular organism growth	grd-10, wrt-2, pha-4, best-24, sma-5, ptr-22, zip-10, ptr-4, acn-1, DC2.5, nipi-3, CE7X_3.2, glf-1, cyp-13A5, clec-1, dhrs-4, ifd-2	1.53395	17	3.16832	0.0959613
GO_Category	GO IDs	GO Term	Genes	Fold Enrichment	Count	% (hit in total input)	P-Value
Cellular Component	GO:0005777	peroxisome	F58F9.7, F59F4.1, acox-1, ctl-2, B0272.4, prx-13	11.0968	6	1.18812	0.000158178
Cellular Component	GO:0042579	microbody	F58F9.7, F59F4.1, acox-1, ctl-2, B0272.4, prx-13	11.0968	6	1.18812	0.000158178
Cellular Component	GO:0005764	lysosome	F27E5.1, hrg-1, gba-3, asah-1	11.3434	4	0.792079	0.00465131
Cellular Component	GO:0000323	lytic vacuole	F27E5.1, hrg-1, gba-3, asah-1	11.3434	4	0.792079	0.00465131
Cellular Component	GO:0005773	vacuole	F27E5.1, hrg-1, gba-3, asah-1	6.54425	4	0.792079	0.022027
GO_Category	GO IDs	GO Term	Genes	Fold Enrichment	Count	% (hit in total input)	P-Value
Molecular Function	GO:0030246	carbohydrate binding	ugt-2, ugt-1, ugt-36, clec-180, clec-51, ugt-44, clec-5, clec-86, ugt-28, clec-70, ugt-16, K04H4.2, clec-84, clec-10, clec-170, C09F9.2, clec-166, lec-8, aman-3, lec-11, clec-81	3.85075	21	4.15842	3.80495e-07
Molecular Function	GO:0009055	electron carrier activity	cyp-14A5, F58F9.7, cyp-25A1, F10D7.3, cyp-13B1, F59F4.1, F15E6.6, DC2.5, daf-36, cyp-37B1, F47B8.3, cyp-34A2, F47B8.4, acox-1, cyp-14A2, cyp-33C9, cyp-13A5, cyp-33C8, cyp-33C7, dhrs-4	2.99354	20	3.76238	5.45609e-05
Molecular Function	GO:0005529	sugar binding	clec-70, clec-180, clec-51, clec-5, clec-10, clec-84, clec-170, clec-166, lec-8, clec-86, lec-11, clec-81	3.81839	12	2.37624	0.000266055
Molecular Function	GO:0070011	peptidase activity, acting on L-amino acid peptides	asp-10, cpt-3, nep-22, pgp-9, asp-8, acn-1, cpr-3, cpr-4, F19C7.2, asp-13, cpt-5, nep-17, hch-1, pcp-3, K10B2.2, F56F10.1, F53A9.2, F53A9.1, K12H4.7, W07B8.1, Y75B8A.4, asp-17, asp-5, C08F11.7, zmp-1	2.03382	25	4.75248	0.00141874
Molecular Function	GO:0020037	heme binding	cyp-14A5, cyp-37B1, cyp-25A1, cyp-13B1, cyp-34A2, ctl-1, ctl-2, cyp-14A2, cyp-13A5, cyp-33C9, cyp-33C8, cyp-33C7, R08F11.7	2.90988	13	2.57426	0.00157387
Molecular Function	GO:0046906	tetrapyrrole binding	cyp-14A5, cyp-37B1, cyp-25A1, cyp-13B1, cyp-34A2, ctl-1, ctl-2, cyp-14A2, cyp-13A5, cyp-33C9, cyp-33C8, cyp-33C7, R08F11.7	2.87029	13	2.57426	0.00176989
Molecular Function	GO:0008233	peptidase activity	asp-10, cpt-3, nep-22, pgp-9, asp-8, acn-1, cpr-3, cpr-4, srp-8, F19C7.2, asp-13, cpt-5, nep-17, hch-1, pcp-3, K10B2.2, F56F10.1, F53A9.2, F53A9.1, K12H4.7, W07B8.1, Y75B8A.4, asp-17, asp-5, zmp-1, C08F11.7	1.95992	26	4.9505	0.00180475
Molecular Function	GO:0005506	iron ion binding	cyp-14A5, cyp-25A1, cyp-13B1, F15E6.6, fat-7, R08F11.7, ftn-1, daf-36, cyp-37B1, cyp-34A2, ctl-1, cyp-14A2, ctl-2, cyp-33C9, cyp-13A5, cyp-33C8, cyp-33C7	2.10594	17	3.36634	0.00647138
Molecular Function	GO:0042302	structural constituent of cuticle	col-139, col-92, col-158, ram-2, col-142, col-129, col-124, col-43, col-95, col-94, dpy-3, F53F1.4	2.51275	12	2.37624	0.00786332
Molecular Function	GO:0004091	carboxylesterase activity	C40H1.7, Y49E10.18, B0035.13, C52A10.1, K03H6.2, F15A8.6, F28H7.3, Y69A2AL.2	3.60626	8	1.38614	0.0122713
Molecular Function	GO:0004190	aspartic-type endopeptidase activity	asp-17, asp-10, asp-8, F56F10.1, asp-5, asp-13	5.0713	6	0.990099	0.0157557
Molecular Function	GO:0070001	aspartic-type peptidase activity	asp-17, asp-10, asp-8, F56F10.1, asp-5, asp-13	5.0713	6	0.990099	0.0157557
Molecular Function	GO:0003997	acyl-CoA oxidase activity	F58F9.7, F59F4.1, acox-1	12.1711	3	0.594059	0.0231904
Molecular Function	GO:0004175	endopeptidase activity	hch-1, asp-10, cpt-3, nep-22, asp-8, F56F10.1, cpr-3, cpr-4, Y75B8A.4, asp-17, asp-5, asp-13, cpt-5, nep-17, zmp-1, C08F11.7	1.89434	16	2.9703	0.0260889
Molecular Function	GO:0016298	lipase activity	C40H1.7, Y49E10.18, asm-2, B0035.13, K03H6.2, F28H7.3, Y69A2AL.2	3.47746	7	1.18812	0.0278169
Molecular Function	GO:0042626	ATPase activity, coupled to transmembrane movement of substances	pgp-6, pgp-9, mrp-3, C49A9.3, pgp-1, pgp-5, pgp-3	2.87588	7	1.38614	0.0336591
Molecular Function	GO:0043492	ATPase activity, coupled to movement of substances	pgp-6, pgp-9, mrp-3, C49A9.3, pgp-1, pgp-5, pgp-3	2.87588	7	1.38614	0.0336591
Molecular Function	GO:0004806	triacylglycerol lipase activity	C40H1.7, Y49E10.18, B0035.13, K03H6.2, F28H7.3	5.40939	5	0.792079	0.0357927
Molecular Function	GO:0016634	oxidoreductase activity, acting on the CH-CH group of donors, oxygen as acceptor	F58F9.7, F59F4.1, acox-1	9.73689	3	0.594059	0.0358004
Molecular Function	GO:0004197	cysteine-type endopeptidase activity	cpt-3, F56F10.1, asp-13, cpt-5, C08F11.7, cpr-3, cpr-4	3.24563	7	1.18812	0.0360887
Molecular Function	GO:0015405	P-P-bond-hydrolysis-driven transmembrane transporter activity	pgp-6, pgp-9, mrp-3, C49A9.3, pgp-1, pgp-5, pgp-3	2.67287	7	1.38614	0.0456391
Molecular Function	GO:0015399	primary active transmembrane transporter activity	pgp-6, pgp-9, mrp-3, C49A9.3, pgp-1, pgp-5, pgp-3	2.67287	7	1.38614	0.0456391
Molecular Function	GO:0016820	hydrolase activity, acting on acid anhydrides, catalyzing transmembrane movement of substances	pgp-6, pgp-9, mrp-3, C49A9.3, pgp-1, pgp-5, pgp-3	2.55274	7	1.38614	0.0549344
Molecular Function	GO:0008559	xenobiotic-transporting ATPase activity	pgp-1, pgp-3	32.4563	2	0.39604	0.0603865
Molecular Function	GO:0042910	xenobiotic transporter activity	pgp-1, pgp-3	32.4563	2	0.39604	0.0603865
Molecular Function	GO:0015239	multidrug transporter activity	pgp-1, pgp-3	32.4563	2	0.39604	0.0603865
Molecular Function	GO:0003993	acid phosphatase activity	pho-9, Y105C5B.15, pho-8, pho-4	4.32751	4	0.792079	0.0628821
Molecular Function	GO:0008234	cysteine-type peptidase activity	cpt-3, F56F10.1, asp-13, cpt-5, W07B8.1, C08F11.7, cpr-3, cpr-4	2.41696	8	1.38614	0.0680559
Molecular Function	GO:0017171	serine hydrolase activity	F19C7.2, pcp-3, K10B2.2, F56F10.1, asp-13, K12H4.7, Y75B8A.4	2.56234	7	1.18812	0.0830553
Molecular Function	GO:0008236	serine-type peptidase activity	F19C7.2, pcp-3, K10B2.2, F56F10.1, asp-13, K12H4.7, Y75B8A.4	2.56234	7	1.18812	0.0830553
Molecular Function	GO:0004428	inositol or phosphatidylinositol kinase activity	lfe-2, T20F7.3, F56F10.1, asp-13	6.08556	4	0.594059	0.0847196
