# Supplementary material for: An intestinal microRNA modulates the homeostatic adaptation to chronic oxidative stress in C. elegans
Source: Aging (Albany NY). 2016 Sep 12;8(9):1979–96. doi: 10.18632/aging.101029 (PMC5076448; doi:10.18632/aging.101029)
Supplement: Supplementary file 6 [file aging-08-1979-s006.xlsx]

## Sheet: S5_Counts_per_gene
WormBase_ID	Gene_Public_Name	speA	speB	s60A	s60B	speD7	s60D7	s60D10
WBGene00000001	aap-1	5315	5179	4244	4893	5527	5305	4033
WBGene00000002	aat-1	221	181	240	172	120	169	111
WBGene00000003	aat-2	639	611	500	619	411	535	464
WBGene00000004	aat-3	1044	926	1088	1014	1362	1948	1364
WBGene00000005	aat-4	205	183	205	200	39	71	26
WBGene00000006	aat-5	176	187	200	224	1168	1087	1186
WBGene00000007	aat-6	69	49	64	46	114	118	79
WBGene00000008	aat-7	4	2	8	5	12	8	6
WBGene00000009	aat-8	16	14	14	14	25	20	7
WBGene00000010	aat-9	4490	4350	3723	4198	3883	4079	3002
WBGene00000012	abf-1	19	10	5	8	135	114	180
WBGene00000013	abf-2	70	67	51	43	3208	5433	4055
WBGene00000014	abf-3	0	0	0	1	0	1	2
WBGene00000015	abf-4	3	3	4	1	0	0	1
WBGene00000016	abf-5	318	242	327	301	143	188	137
WBGene00000017	abf-6	542	428	513	485	152	324	246
WBGene00000018	abl-1	3334	2880	2955	2869	2344	3056	1904
WBGene00000019	abt-1	18	12	14	18	35	43	12
WBGene00000020	abt-2	1018	968	901	975	2184	3339	968
WBGene00000021	abt-3	0	0	0	0	3	2	0
WBGene00000022	abt-4	1702	1978	3364	3057	488	798	432
WBGene00000023	abt-5	41	30	54	31	304	292	165
WBGene00000024	abu-1	1	0	1	0	0	0	0
WBGene00000025	abu-2	5	5	4	5	2	2	1
WBGene00000026	abu-3	4	3	1	0	0	1	1
WBGene00000027	abu-4	0	0	0	1	1	0	0
WBGene00000028	abu-5	0	0	0	0	0	0	0
WBGene00000029	abu-6	2	0	1	0	0	0	0
WBGene00000030	abu-7	4	0	2	5	3	6	1
WBGene00000031	abu-8	5	12	14	5	3	4	6
WBGene00000032	abu-9	0	0	0	0	0	0	0
WBGene00000033	abu-10	6	3	7	4	1	5	2
WBGene00000034	abu-11	15	7	17	16	12	14	84
WBGene00000035	ace-1	414	423	418	402	447	651	400
WBGene00000036	ace-2	549	502	742	651	590	807	682
WBGene00000037	ace-3	124	89	174	123	151	159	108
WBGene00000038	ace-4	23	17	23	28	24	27	14
WBGene00000039	acn-1	369	191	761	356	91	213	159
WBGene00000040	aco-1	9111	9255	10652	11211	9251	12765	10583
WBGene00000041	aco-2	46162	51924	45110	51947	81041	91144	81798
WBGene00000042	acr-2	10	13	19	15	16	13	18
WBGene00000043	acr-3	10	7	6	8	12	14	9
WBGene00000044	acr-5	40	23	33	29	119	124	68
WBGene00000045	acr-6	8	7	10	9	9	14	7
WBGene00000046	acr-7	27	14	29	18	23	41	25
WBGene00000047	acr-8	14	7	19	17	8	15	11
WBGene00000048	acr-9	36	16	21	21	42	36	35
WBGene00000049	acr-10	12	8	5	10	25	36	32
WBGene00000050	acr-11	50	48	40	44	63	70	42
WBGene00000051	acr-12	57	44	78	64	347	385	341
WBGene00000053	acr-14	4	10	6	7	21	22	29
WBGene00000054	acr-15	88	87	76	78	137	190	111
WBGene00000055	acr-16	185	140	128	120	113	125	62
WBGene00000056	acr-17	62	57	73	81	254	272	268
WBGene00000057	acr-18	203	154	199	158	236	265	180
WBGene00000058	acr-19	40	23	31	22	20	28	25
WBGene00000059	acr-20	48	28	34	40	74	82	38
WBGene00000060	acr-21	11	6	12	16	10	39	13
WBGene00000061	lgc-11	12	8	14	12	9	14	15
WBGene00000062	acr-23	6	0	8	3	34	47	45
WBGene00000063	act-1	7984	7339	8102	8541	2138	2275	2079
WBGene00000064	act-2	71296	74913	59537	69231	33791	34832	31678
WBGene00000065	act-3	14082	11491	12888	12168	5569	5892	4585
WBGene00000066	act-4	51211	40585	57245	54415	16543	23255	21848
WBGene00000067	act-5	10272	9124	8672	8447	788	1505	745
WBGene00000068	acy-1	291	247	349	290	339	474	342
WBGene00000069	acy-2	62	19	40	40	33	67	40
WBGene00000070	acy-3	518	453	508	425	1068	1058	946
WBGene00000071	acy-4	227	213	255	242	349	546	263
WBGene00000072	add-1	89	83	142	165	77	116	54
WBGene00000073	add-2	2218	1875	1691	1734	1150	1251	978
WBGene00000074	adm-2	1779	1885	1857	2477	2523	3116	2515
WBGene00000075	adm-4	1366	1289	991	1095	812	667	442
WBGene00000079	adr-1	4103	4666	4098	4539	5482	7051	5947
WBGene00000080	adr-2	5838	5295	4390	4867	6188	6323	4393
WBGene00000081	ads-1	6492	5837	6669	7330	42531	62348	95433
WBGene00000082	adt-1	74	41	73	64	36	48	17
WBGene00000083	adt-2	1147	955	1043	847	668	736	468
WBGene00000084	aex-1	498	425	532	465	174	323	84
WBGene00000085	aex-2	26	32	30	28	30	47	41
WBGene00000086	aex-3	379	342	487	371	594	955	516
WBGene00000088	aex-5	725	628	649	586	437	703	677
WBGene00000089	aex-6	204	189	279	275	173	262	171
WBGene00000090	age-1	6803	6731	5218	6201	3025	3485	2022
WBGene00000092	ags-3	1509	1368	1485	1433	5934	5577	6214
WBGene00000093	agt-1	1342	1061	925	1021	1595	1341	1383
WBGene00000094	agt-2	1142	1024	924	935	1137	1127	672
WBGene00000095	aha-1	1571	1368	1252	1279	1790	1961	1339
WBGene00000096	ahr-1	21	23	44	41	124	105	67
WBGene00000097	aip-1	2232	2134	1729	2051	7198	5313	6419
WBGene00000098	air-1	12847	11083	9196	10367	12363	11093	7427
WBGene00000099	air-2	6141	5414	4749	5270	3879	3397	2169
WBGene00000100	ajm-1	5436	5112	6369	6188	5094	7577	5694
WBGene00000101	aka-1	13923	13746	10488	12143	13477	13592	9336
WBGene00000102	akt-1	13780	13046	10795	12230	11514	11364	7221
WBGene00000103	akt-2	1069	976	1352	1582	2093	2696	2243
WBGene00000105	alg-1	4515	4049	4448	4229	2554	4138	1977
WBGene00000106	alg-2	9923	9403	9017	9578	6528	7237	4681
WBGene00000107	alh-1	9984	9954	9612	10354	18082	20198	18048
WBGene00000108	alh-2	2	2	0	3	15	5	3
WBGene00000109	alh-3	3571	3769	3460	3449	3204	5976	2602
WBGene00000110	alh-4	7924	7935	7855	9081	8520	9890	7277
WBGene00000111	alh-5	570	496	689	567	204	347	189
WBGene00000112	alh-6	3065	3258	2993	3170	2141	2804	2237
WBGene00000113	alh-7	1920	1828	1797	1868	1720	2029	1786
WBGene00000114	alh-8	52191	48294	46693	46361	92538	80869	192166
WBGene00000115	alh-9	6373	6413	5741	5722	2142	2481	1369
WBGene00000116	alh-10	677	683	815	678	214	281	148
WBGene00000117	alh-11	1739	1694	1477	1656	1342	1526	959
WBGene00000118	alh-12	2110	1923	2074	2225	1544	1362	1423
WBGene00000120	aly-1	3857	3272	3419	3388	9823	9715	9140
WBGene00000121	aly-2	21147	19189	15401	16529	19323	16604	13813
WBGene00000122	aly-3	17700	14986	13459	13895	10248	9918	6849
WBGene00000123	ama-1	21493	22997	19180	21766	23941	30821	22932
WBGene00000133	amt-1	1702	1536	909	731	57	23	42
WBGene00000134	amt-2	22	19	23	29	60	58	35
WBGene00000135	amt-3	68	56	75	76	100	163	117
WBGene00000136	amt-4	230	208	2053	2215	746	1078	2001
WBGene00000137	amx-1	1976	1725	1571	1677	1694	1875	991
WBGene00000138	amx-2	579	560	569	529	298	563	360
WBGene00000139	amx-3	149	102	139	111	130	159	83
WBGene00000140	anc-1	1618	1314	1447	1566	1976	3611	1510
WBGene00000142	aos-1	6165	5237	4560	4770	5001	4599	3804
WBGene00000143	apc-2	3119	2785	2222	2522	1249	1210	672
WBGene00000144	apc-10	1546	1344	1095	1201	1939	1612	1384
WBGene00000145	apc-11	1914	1572	1376	1514	1417	1168	1438
WBGene00000146	ape-1	16387	15531	13560	14437	18050	24493	15627
WBGene00000147	aph-1	2984	2583	2325	2464	4536	4919	4602
WBGene00000148	aph-2	4128	3773	3480	3551	2660	2909	1650
WBGene00000149	apl-1	8963	8491	9340	8609	16874	27153	28134
WBGene00000150	apm-1	1348	1157	1387	1241	4405	5988	6502
WBGene00000151	apn-1	5215	4529	3895	4286	4902	5009	3250
WBGene00000155	app-1	12158	11415	8868	10009	7607	6769	5170
WBGene00000156	apr-1	10021	9337	7698	8645	12818	12910	8901
WBGene00000157	aps-2	1413	1041	1222	1118	1102	1157	1018
WBGene00000158	apg-1	5442	5675	4994	5389	3412	4298	2494
WBGene00000159	aps-1	2726	2067	2185	2108	3545	3384	4332
WBGene00000160	apb-1	5972	6583	5515	6298	4884	6738	5153
WBGene00000161	apa-2	4199	4525	4156	4720	4428	5652	3368
WBGene00000162	apd-3	5575	5763	4496	4956	2679	3094	2072
WBGene00000163	apb-3	9843	9095	7882	8601	15692	17661	14621
WBGene00000164	apm-3	1862	1718	1559	1652	1362	1571	1099
WBGene00000165	aps-3	2463	1730	2030	1857	1330	1317	1382
WBGene00000166	apt-9	24	38	38	32	31	44	39
WBGene00000168	apx-1	8892	9086	6595	7875	7482	8773	5226
WBGene00000169	aqp-1	519	396	612	562	1411	1848	1577
WBGene00000170	aqp-2	4544	2687	6879	4180	5083	10441	6522
WBGene00000171	aqp-3	30	27	27	24	64	105	82
WBGene00000172	aqp-4	133	92	168	141	94	123	29
WBGene00000173	aqp-5	8	4	2	9	14	41	9
WBGene00000174	aqp-6	47	36	46	32	126	154	86
WBGene00000175	aqp-7	5237	4524	8713	7416	8023	15796	9670
WBGene00000176	aqp-8	1616	1313	1564	1232	1919	2603	1308
WBGene00000177	aqp-9	113	88	107	103	55	53	42
WBGene00000178	aqp-10	2013	1485	1786	1497	3428	4440	3361
WBGene00000179	aqp-11	1106	917	1049	930	1149	1626	1171
WBGene00000180	arc-1	701	616	669	645	356	517	295
WBGene00000181	ard-1	8930	7957	8082	8131	11297	11390	10536
WBGene00000182	arf-1.2	28039	24912	23286	23470	19061	22920	15870
WBGene00000183	arf-3	25512	22904	20597	21118	24583	28482	32362
WBGene00000184	arf-6	1628	1534	1369	1442	1304	1608	1052
WBGene00000185	arg-1	2	1	2	2	13	21	7
WBGene00000186	ark-1	3055	3066	2466	2760	2192	3020	1796
WBGene00000187	arl-1	3095	2502	2346	2389	3303	3142	2327
WBGene00000188	arl-3	0	0	0	0	0	0	0
WBGene00000189	arl-5	1414	1189	1121	1118	1945	1854	1705
WBGene00000190	arf-1.1	88	53	358	221	230	200	242
WBGene00000191	arl-7	217	93	219	179	288	373	375
WBGene00000192	arl-8	7015	6217	5256	5820	3575	3613	2381
WBGene00000193	arl-6	11	7	20	18	19	46	33
WBGene00000195	arr-1	1839	1687	1567	1570	1972	2134	1710
WBGene00000196	aars-1	1721	1580	1210	1456	581	551	212
WBGene00000197	aars-2	24973	29126	20774	25977	24783	33101	30199
WBGene00000198	art-1	10006	9184	8921	8996	7930	7750	5041
WBGene00000199	arx-1	5498	5656	4794	5384	4408	6225	5456
WBGene00000200	arx-2	5731	5519	4690	5131	9379	10052	8361
WBGene00000201	arx-3	5251	5202	4381	5118	5172	5852	5245
WBGene00000202	exos-4.2	3990	2952	2964	2869	5779	5678	5145
WBGene00000203	arx-5	2868	2743	2455	2632	2425	2452	1800
WBGene00000204	arx-6	2174	2105	1848	2029	1890	2125	1511
WBGene00000205	arx-7	1960	1763	1690	1738	2460	2427	1825
WBGene00000206	asb-1	15712	14552	12015	12965	9703	8834	7750
WBGene00000207	asb-2	11086	9818	11067	10530	12431	13627	13901
WBGene00000208	asc-1	3121	3115	2665	2924	6520	7312	6141
WBGene00000209	asg-1	9223	7639	7088	7268	7920	7533	8142
WBGene00000210	asg-2	4395	3555	4168	3906	3199	3649	3606
WBGene00000211	asm-1	393	429	514	535	1088	1433	990
WBGene00000212	asm-2	469	449	676	781	114	305	293
WBGene00000213	asm-3	17	34	31	54	17	15	9
WBGene00000214	asp-1	45917	39206	53989	48599	276279	352876	567131
WBGene00000215	asp-2	26637	23252	34787	33416	5205	6664	4981
WBGene00000216	asp-3	52786	47385	41988	38650	46343	40224	46953
WBGene00000217	asp-4	27478	22459	23452	21684	10803	12692	13244
WBGene00000218	asp-5	31584	27825	18218	17118	60808	51795	44688
WBGene00000219	asp-6	67526	54455	58986	48868	341245	586328	600047
WBGene00000220	atf-2	272	123	488	284	208	221	196
WBGene00000221	atf-5	4047	3621	3338	3167	3512	4445	3573
WBGene00000222	atf-6	1148	1080	1041	1052	1425	1782	832
WBGene00000223	atf-7	13158	12667	11871	12470	8704	11019	5687
WBGene00000224	atgp-1	1696	1450	2004	1942	9217	8842	10457
WBGene00000225	atgp-2	751	676	721	698	680	648	552
WBGene00000226	atl-1	5955	5464	4491	5050	4610	5400	1881
WBGene00000227	atm-1	4738	4917	3948	4701	2492	3123	1753
WBGene00000228	atn-1	5362	4989	7602	7439	2764	4502	3720
WBGene00000229	atp-2	109218	111807	97933	106232	48700	56935	50568
WBGene00000230	atp-3	29513	26982	26931	26962	43714	49011	50847
WBGene00000231	atx-2	12980	15943	12685	15012	11095	15714	9192
WBGene00000232	avr-14	140	107	111	103	167	173	123
WBGene00000233	avr-15	813	663	784	694	310	406	271
WBGene00000235	baf-1	9590	7593	7947	7653	10117	10397	10158
WBGene00000236	bag-1	4242	3484	3119	3135	2874	2653	2662
WBGene00000237	bam-2	864	848	1183	1194	1030	1416	811
WBGene00000238	bar-1	267	201	345	273	133	191	146
WBGene00000239	bas-1	557	467	502	517	155	217	103
WBGene00000240	pah-1	1395	1280	1130	1145	8396	5045	10937
WBGene00000241	bbs-1	18	17	35	27	54	53	50
WBGene00000242	bbs-2	20	7	29	20	39	42	41
WBGene00000244	bbs-8	32	28	38	34	63	84	71
WBGene00000245	bca-1	998	879	729	681	3344	3228	3915
WBGene00000246	bcc-1	57	43	35	87	203	233	183
WBGene00000247	bec-1	2999	2435	2178	2373	6060	7598	5445
WBGene00000248	ben-1	2494	2296	2369	2325	3508	5001	4081
WBGene00000249	bir-1	3147	2688	2377	2389	2280	1911	1910
WBGene00000250	bir-2	2043	1929	1663	1780	2377	2466	1952
WBGene00000251	bli-1	2	3	4	1	0	1	0
WBGene00000252	bli-2	3	0	10	4	9	12	4
WBGene00000253	bli-3	1108	975	1133	998	757	1166	635
WBGene00000254	bli-4	16018	15477	12891	14779	17789	22267	12689
WBGene00000255	bli-5	31	24	25	12	33	22	28
WBGene00000256	bli-6	63	61	98	63	4	6	9
WBGene00000257	bmk-1	9025	8586	7989	8644	9620	11403	7206
WBGene00000259	bpl-1	1732	1671	1385	1542	987	1162	561
WBGene00000262	bra-1	740	545	560	568	1435	1380	1124
WBGene00000263	F23H11.5	9684	8332	8496	8731	9917	10635	10662
WBGene00000264	brc-1	2688	2522	2170	2295	2048	2186	1284
WBGene00000265	brd-1	2499	2527	1936	2108	1902	2548	1432
WBGene00000266	bre-1	2361	1934	942	699	1112	1271	1278
WBGene00000267	bre-2	187	86	141	114	75	122	40
WBGene00000268	bre-3	4996	5051	4065	5042	5182	5527	2825
WBGene00000269	bre-4	1690	1627	1298	1352	1942	1833	1468
WBGene00000270	bre-5	1501	1224	982	1041	396	298	236
WBGene00000271	brf-1	3991	3731	3106	3419	3426	3592	1778
WBGene00000272	bro-1	32	8	57	25	16	21	11
WBGene00000273	brp-1	21479	24732	19823	24420	38266	56806	45489
WBGene00000274	btf-1	5682	6021	4542	5213	3048	3980	2006
WBGene00000275	bub-1	15769	15694	13038	14302	11582	14059	9191
WBGene00000276	byn-1	4103	3665	3556	3660	19422	21926	25852
WBGene00000277	cab-1	3944	3688	4550	4410	6190	12713	9510
WBGene00000279	cah-1	232	227	184	182	483	413	368
WBGene00000280	cah-2	53	34	50	44	52	89	86
WBGene00000281	cah-3	1259	1105	1100	1053	537	631	468
WBGene00000282	cah-4	4635	3960	4651	4209	4520	8155	3842
WBGene00000283	cah-5	751	685	716	730	83	127	70
WBGene00000284	cah-6	80	62	91	80	193	227	182
WBGene00000285	cal-1	340	248	469	416	695	849	751
WBGene00000286	cal-2	356	318	394	408	791	969	795
WBGene00000287	cal-3	69	63	84	78	50	68	49
WBGene00000288	cal-4	146	99	152	154	208	282	239
WBGene00000289	cam-1	8297	7365	7623	7904	7435	7266	4544
WBGene00000292	cap-1	7587	7162	6611	6788	9429	10854	9194
WBGene00000293	cap-2	7523	6526	6405	6397	12053	13548	13128
WBGene00000294	cas-1	5224	5592	5797	6610	7724	10107	8593
WBGene00000295	cat-1	47	43	60	60	35	75	36
WBGene00000296	cat-2	74	53	77	59	18	26	13
WBGene00000298	cat-4	1043	922	936	838	2809	3357	2061
WBGene00000301	cav-1	18131	13361	21830	17648	33689	39517	28245
WBGene00000302	cav-2	60	40	34	38	44	87	35
WBGene00000308	C04A11.t1	1	0	1	0	4	5	2
WBGene00000310	C05C9.t1	1	0	0	0	0	0	0
WBGene00000311	C05C9.t2	0	0	0	0	0	0	0
WBGene00000366	cbp-1	16108	15946	14187	16345	10508	15840	8173
WBGene00000367	cca-1	663	558	664	605	615	871	500
WBGene00000368	ccb-1	452	423	439	437	949	919	877
WBGene00000369	ccf-1	8181	8029	6494	7073	4813	4938	3738
WBGene00000370	ccg-1	5089	5396	6117	7927	12553	17783	16501
WBGene00000371	cco-1	23302	19644	19564	19869	21768	22987	22440
WBGene00000372	cyp-13A7	43	32	44	40	6	2	2
WBGene00000373	cyp-14A5	962	877	455	564	928	1288	486
WBGene00000374	cyp-31A1	469	318	407	378	194	320	174
WBGene00000375	cyp-44A1	2053	1758	1425	1635	1014	889	537
WBGene00000376	ccr-4	33560	32899	26443	29564	23846	24636	16236
WBGene00000377	cct-1	21502	22808	17638	20306	30017	32241	33394
WBGene00000378	cct-2	15847	18608	13988	16768	15458	17535	18641
WBGene00000379	cct-4	16798	18154	14023	16513	31371	34383	36345
WBGene00000380	cct-5	28833	29976	25509	28414	37164	39046	47810
WBGene00000381	cct-6	15216	17661	13254	16019	17625	21771	21547
WBGene00000382	cdc-6	7175	6813	5482	6045	7004	6657	4494
WBGene00000383	cdc-14	12005	11352	10602	11344	14159	16160	9898
WBGene00000386	cdc-25.1	12780	12784	10086	11399	11125	10793	7682
WBGene00000387	cdc-25.2	5845	5172	5330	5139	2511	2463	1563
WBGene00000388	cdc-25.3	4004	3309	2993	3074	2729	1836	996
WBGene00000389	cdc-25.4	1	0	3	2	3	12	1
WBGene00000390	cdc-42	11658	10780	9486	10250	13528	14979	8451
WBGene00000391	cdd-1	244	199	256	243	102	153	167
WBGene00000392	cdd-2	0	0	0	0	0	0	0
WBGene00000393	cdf-1	1569	1515	1540	1644	2130	2247	1665
WBGene00000395	cdh-3	1079	1001	1030	987	439	532	228
WBGene00000396	cdh-4	7666	6523	6707	7052	7501	9612	3495
WBGene00000397	cdh-5	162	123	261	157	251	280	116
WBGene00000399	cdh-7	17	14	11	18	939	1370	762
WBGene00000401	cdh-9	57	33	124	58	79	88	81
WBGene00000402	cdh-10	34	31	39	35	67	87	53
WBGene00000403	casy-1	2889	2756	3101	3438	8053	10501	8885
WBGene00000405	cdk-1	17140	14708	12312	13436	14515	13250	10161
WBGene00000406	cdk-4	1266	992	1046	1075	1176	1141	908
WBGene00000407	cdk-5	3167	3000	2455	2785	2365	2804	1677
WBGene00000408	cdk-7	5798	4934	4359	4624	7706	7366	6043
WBGene00000409	cdk-8	4455	4134	3314	3766	2898	2423	1401
WBGene00000410	cdk-9	2302	2322	2036	2159	2329	2970	2067
WBGene00000411	cdl-1	21168	20264	17768	19299	24438	26916	18573
WBGene00000412	cdr-1	10	13	13	18	22	27	10
WBGene00000413	cdt-1	7072	6990	6417	6425	5341	5791	3509
WBGene00000414	cec-1	1854	1327	1815	1523	3318	4997	3192
WBGene00000415	ced-1	8537	9205	7799	9767	6707	9044	6343
WBGene00000416	ced-2	5364	4781	4020	4469	6782	7472	6722
WBGene00000417	ced-3	12262	13220	9714	12007	5876	7246	3547
WBGene00000418	ced-4	2489	2285	2106	2235	3470	3442	2366
WBGene00000419	ced-5	6166	6143	4962	5483	2785	3297	1690
WBGene00000420	ced-6	4153	4154	3699	4171	2727	3299	2214
WBGene00000421	ced-7	11961	12115	11117	12457	7334	10238	5337
WBGene00000422	ced-8	492	365	395	391	579	580	272
WBGene00000423	ced-9	4415	3898	3387	3588	2915	2791	2009
WBGene00000424	ced-10	4574	3913	3616	3841	4062	4504	3492
WBGene00000425	ced-11	322	208	472	270	433	423	170
WBGene00000426	ced-12	6176	5748	5395	5847	4800	5949	4220
WBGene00000427	ced-13	2	0	1	1	106	396	316
WBGene00000428	ceh-1	12	3	14	6	24	36	29
WBGene00000429	ceh-2	29	22	28	12	23	28	17
WBGene00000430	ceh-5	36	18	47	35	87	65	47
WBGene00000431	ceh-6	95	62	115	76	93	113	72
WBGene00000432	ceh-7	0	0	1	2	2	7	2
WBGene00000433	ceh-8	26	8	26	21	20	21	19
WBGene00000434	ceh-9	6	7	8	3	35	26	27
WBGene00000435	ceh-10	41	17	67	27	187	164	624
WBGene00000436	ceh-12	4	4	4	2	3	2	5
WBGene00000437	ceh-13	473	291	487	342	412	515	393
WBGene00000438	ceh-14	62	45	57	54	42	81	62
WBGene00000439	ceh-16	85	53	89	61	71	45	27
WBGene00000440	ceh-17	6	3	13	5	5	14	7
WBGene00000441	ceh-18	391	323	452	392	363	506	428
WBGene00000442	ceh-19	46	35	47	39	76	82	67
WBGene00000443	ceh-20	1135	804	1255	1018	1961	2680	1645
WBGene00000444	ceh-21	2338	2144	1748	1964	2513	2363	1908
WBGene00000445	ceh-22	82	19	95	47	41	43	65
WBGene00000446	ceh-23	19	10	18	22	13	27	20
WBGene00000447	ceh-24	11	7	10	10	7	14	7
WBGene00000448	pros-1	166	118	296	171	131	249	176
WBGene00000449	ceh-27	209	99	246	136	30	55	26
WBGene00000450	ceh-28	0	0	3	0	3	0	0
WBGene00000451	ceh-30	61	42	83	57	11	12	5
WBGene00000452	ceh-31	33	18	50	34	10	19	16
WBGene00000453	ceh-32	4610	3693	4733	4630	1436	1058	673
WBGene00000454	ceh-33	18	17	20	16	20	22	36
WBGene00000455	ceh-34	188	114	253	177	77	143	83
WBGene00000457	ceh-36	126	53	139	80	11	23	26
WBGene00000458	ceh-37	828	567	883	785	317	731	368
WBGene00000459	ceh-38	10903	10755	8566	9983	10010	10440	5564
WBGene00000460	ceh-39	3386	3442	2645	3158	2962	2489	1786
WBGene00000461	ceh-40	1006	835	752	808	1657	1525	1025
WBGene00000462	ceh-41	1231	1055	1076	1115	1245	1096	722
WBGene00000463	ceh-43	1753	1179	2010	1698	1191	913	565
WBGene00000464	ceh-44	7896	7226	6577	6971	5596	6037	4128
WBGene00000465	cpg-1	115876	135237	92303	122126	46084	37934	28218
WBGene00000466	cel-1	4242	3838	3443	3542	3929	4603	2930
WBGene00000467	cep-1	3804	3138	2857	3049	3396	3304	2304
WBGene00000468	ces-1	56	16	63	41	11	16	6
WBGene00000469	ces-2	374	149	538	295	42	64	60
WBGene00000472	cey-1	24309	22071	22174	22611	18599	26018	18245
WBGene00000473	cey-2	90785	88861	67539	76560	33501	25281	22337
WBGene00000474	cey-3	40998	37869	30641	33846	16950	13145	10726
WBGene00000475	cey-4	38497	37959	33678	36856	45925	58089	53489
WBGene00000476	cfi-1	96	91	163	105	198	246	216
WBGene00000477	cft-1	112	89	136	121	96	205	143
WBGene00000478	cfz-2	602	394	820	608	472	395	251
WBGene00000479	cgh-1	87431	108845	76132	96138	25793	26261	14081
WBGene00000480	cgp-1	13265	13344	10974	12603	12384	14992	10118
WBGene00000481	cha-1	97	74	97	96	66	107	63
WBGene00000482	chd-3	7169	6980	7100	7506	12851	14597	9967
WBGene00000483	che-1	3	0	4	2	7	3	5
WBGene00000484	che-2	19	6	30	24	19	21	23
WBGene00000485	che-3	523	572	349	330	200	347	175
WBGene00000487	che-6	23	15	10	10	15	14	12
WBGene00000488	che-7	46	21	50	36	59	51	41
WBGene00000490	che-11	32	19	40	42	50	58	40
WBGene00000491	che-12	121	124	141	143	385	699	363
WBGene00000492	che-13	62	33	57	43	31	54	34
WBGene00000493	che-14	81	74	113	89	287	404	145
WBGene00000496	chs-1	20660	22632	15683	19950	7463	4423	2225
WBGene00000497	chs-2	181	139	182	156	248	221	107
WBGene00000498	chk-1	4971	4737	4004	4464	3825	4682	3156
WBGene00000499	chk-2	315	305	241	262	699	773	613
WBGene00000500	chn-1	4604	3589	3305	3419	4466	4206	3577
WBGene00000501	cho-1	107	67	104	123	140	191	171
WBGene00000502	chp-1	3566	3079	2719	2903	4903	5490	5977
WBGene00000503	cht-1	10685	8670	13146	11502	29636	27926	16191
WBGene00000506	cic-1	1763	1535	1362	1485	1101	1006	781
WBGene00000507	cit-1.1	2628	2424	2018	2185	1231	1123	591
WBGene00000508	cit-1.2	3708	3563	3447	3691	6360	7639	5635
WBGene00000509	cka-1	3299	3205	2659	2900	2970	2819	1835
WBGene00000510	cka-2	108	89	104	85	118	167	116
WBGene00000511	ckb-1	219	222	161	147	202	279	174
WBGene00000512	ckb-2	6508	5946	1408	1405	913	1074	749
WBGene00000513	ckb-3	2	4	2	0	10	6	12
WBGene00000514	ckb-4	851	758	504	561	225	340	170
WBGene00000515	ckc-1	796	760	706	789	262	375	212
WBGene00000516	cki-1	415	229	572	354	718	732	679
WBGene00000517	cki-2	2915	2708	2263	2558	2223	2690	1536
WBGene00000518	ckk-1	144	117	166	152	234	251	220
WBGene00000519	cku-70	4545	4661	3915	4419	4556	5197	3239
WBGene00000520	cku-80	3972	3831	3299	3573	4268	3828	2553
WBGene00000521	cky-1	10	6	34	7	3	6	4
WBGene00000522	clc-1	569	445	553	451	236	297	181
WBGene00000523	clc-2	152	139	148	139	397	387	288
WBGene00000524	clc-3	118	94	144	104	93	94	84
WBGene00000525	clc-4	8	11	7	12	0	3	2
WBGene00000526	clc-5	119	106	160	133	266	228	180
WBGene00000527	cle-1	1767	1824	1961	1934	3151	3846	2842
WBGene00000528	clh-1	2826	2750	2734	2324	3282	6542	4067
WBGene00000529	clh-2	267	188	130	119	202	212	159
WBGene00000530	clh-3	2356	2370	1968	2205	1642	3325	1303
WBGene00000531	clh-4	81	79	115	99	148	158	135
WBGene00000532	clh-5	6104	5760	4972	5429	2710	3452	1900
WBGene00000533	clh-6	2663	2491	2181	2390	3077	3413	2233
WBGene00000534	cpi-2	11577	9435	10499	10590	18021	21662	20325
WBGene00000535	cpi-1	4917	4229	3899	4188	39605	61769	55894
WBGene00000536	clk-1	1826	1634	1525	1550	2230	2218	2258
WBGene00000537	clk-2	2533	2581	1934	2343	2399	2495	1400
WBGene00000539	cln-3.1	163	109	162	162	10	4	9
WBGene00000540	cln-3.2	1044	1027	869	945	1016	979	680
WBGene00000541	cln-3.3	69	53	131	137	31	27	10
WBGene00000542	clp-1	11055	10238	9755	10096	7705	10987	6962
WBGene00000543	clp-2	2736	2711	2206	2374	1789	1934	1043
WBGene00000544	clp-3	82	85	75	73	106	112	42
WBGene00000545	clp-4	1877	1887	2373	2849	9825	11471	14379
WBGene00000546	clp-6	45	40	41	48	192	208	107
WBGene00000547	clp-7	5229	5577	4524	5327	3605	5837	4128
WBGene00000548	clr-1	8348	8015	6886	7394	3982	5149	2735
WBGene00000549	cls-2	4236	4222	4002	4348	5639	7994	5688
WBGene00000550	clu-1	11912	13802	10920	12624	6319	6980	3484
WBGene00000551	clx-1	5	9	0	1	1156	164	283
WBGene00000552	cmd-1	20872	20319	18233	19717	12417	15032	12036
WBGene00000553	cmk-1	172	140	197	175	472	557	588
WBGene00000554	cnb-1	1865	1534	1558	1512	1541	2078	1524
WBGene00000555	cnc-1	0	7	3	25	22	80	51
WBGene00000556	cnc-2	248	755	270	1984	249	970	246
WBGene00000557	cnc-3	382	283	225	204	52	65	23
WBGene00000558	cnc-4	1893	2538	2051	5140	1107	3732	1711
WBGene00000559	cnc-5	0	2	0	4	15	57	16
WBGene00000560	cnc-6	44	172	32	398	253	683	176
WBGene00000561	cnd-1	105	44	116	64	33	24	20
WBGene00000562	cng-1	255	161	132	164	479	813	219
WBGene00000563	cng-3	8	9	7	18	8	13	5
WBGene00000564	cnk-1	6191	6228	4843	5525	3508	4474	2428
WBGene00000565	cnt-1	2808	3315	2854	3339	2114	2894	1876
WBGene00000566	cnt-2	5594	5043	5247	5398	3976	4681	2649
WBGene00000567	cnx-1	13651	13258	11275	12075	22533	26831	24758
WBGene00000583	cof-2	88	59	98	68	40	101	48
WBGene00000584	cog-1	65	65	93	76	64	108	80
WBGene00000585	cogc-2	3585	3570	2784	3106	2255	2301	1269
WBGene00000591	coh-1	2275	2227	2153	2205	1910	2122	1274
WBGene00000592	coh-3	1238	1297	1067	1208	2101	2276	1730
WBGene00000593	col-2	8	5	11	8	23	27	31
WBGene00000594	col-3	12	8	13	10	1	2	1
WBGene00000596	col-7	6	5	7	3	2	3	0
WBGene00000597	col-8	48531	40891	47502	44004	598	579	424
WBGene00000598	col-9	5	3	3	3	13	11	12
WBGene00000599	col-10	95	71	120	74	6	3	4
WBGene00000601	col-12	27	13	44	22	6	2	6
WBGene00000602	col-13	14	16	26	29	0	0	0
WBGene00000603	col-14	27	16	76	30	8	13	7
WBGene00000606	col-17	3	1	5	1	0	2	1
WBGene00000608	col-19	51207	40009	63659	52930	292	302	181
WBGene00000609	col-20	83586	70718	95459	87867	181	104	102
WBGene00000610	col-33	14	9	20	19	1	7	6
WBGene00000611	col-34	320	319	420	453	121	278	187
WBGene00000612	col-35	0	0	0	0	1	1	0
WBGene00000613	col-36	2	2	6	2	4	2	11
WBGene00000614	col-37	0	0	0	0	0	0	2
WBGene00000615	col-38	200	198	75	135	146	128	70
WBGene00000616	col-39	48	43	138	50	2	0	1
WBGene00000617	col-40	5	2	7	4	8	14	13
WBGene00000618	col-41	3	1	1	1	11	14	10
WBGene00000620	col-43	301	361	151	180	3	4	1
WBGene00000621	col-44	0	1	0	0	4	5	2
WBGene00000622	col-45	29	20	25	30	32	30	17
WBGene00000623	col-46	5	4	10	4	10	12	17
WBGene00000624	col-47	0	1	0	0	0	0	0
WBGene00000625	col-48	79	82	122	73	263	135	620
WBGene00000626	col-49	2	0	6	2	1	4	1
WBGene00000627	col-50	1	1	1	1	4	2	8
WBGene00000628	col-51	1	0	2	1	3	2	1
WBGene00000629	col-52	5	1	5	2	0	6	4
WBGene00000630	col-53	65	40	51	58	9	16	4
WBGene00000631	col-54	4	0	5	3	1	2	1
WBGene00000632	col-55	1	0	1	0	2	0	3
WBGene00000633	col-56	0	0	2	1	0	0	0
WBGene00000634	col-58	7	3	7	2	0	1	2
WBGene00000636	col-60	33	19	17	31	33	28	19
WBGene00000637	col-61	6	4	3	0	1	1	2
WBGene00000638	col-62	22	23	34	14	11	29	10
WBGene00000639	col-63	26	11	20	18	8	2	2
WBGene00000640	col-64	53	42	46	39	124	161	122
WBGene00000641	col-65	16	5	40	7	1	6	2
WBGene00000642	col-66	2	1	3	1	1	0	2
WBGene00000644	col-68	80	43	48	50	53	75	59
WBGene00000645	col-69	5	2	14	12	2	7	4
WBGene00000646	col-70	1	1	6	0	2	2	2
WBGene00000647	col-71	105	75	90	91	163	266	248
WBGene00000648	col-72	2	2	0	2	8	10	14
WBGene00000649	col-73	6	2	20	1	1	0	0
WBGene00000650	col-74	93	57	316	102	7	13	7
WBGene00000651	col-75	2	1	1	2	3	0	2
WBGene00000652	col-76	585	393	767	543	308	565	322
WBGene00000653	col-77	34	13	66	21	7	5	3
WBGene00000654	col-78	2	0	0	1	4	2	1
WBGene00000655	col-79	0	0	2	2	0	0	0
WBGene00000656	col-80	39148	33177	43338	34891	93	51	73
WBGene00000657	col-81	301	226	609	314	11	18	6
WBGene00000658	col-83	21	13	11	9	42	33	61
WBGene00000659	col-84	24	29	24	35	46	67	49
WBGene00000660	col-85	6	2	2	8	7	5	7
WBGene00000661	col-86	27	22	17	19	43	65	67
WBGene00000662	col-87	5	4	7	4	16	9	7
WBGene00000663	col-88	3	1	29	0	4	16	9
WBGene00000664	col-89	47	49	67	59	130	117	90
WBGene00000665	col-90	6	10	14	13	1	2	0
WBGene00000666	col-91	2	0	10	2	9	8	7
WBGene00000667	col-92	340	263	689	618	0	0	1
WBGene00000668	col-93	47864	36923	52783	39529	63	36	52
WBGene00000669	col-94	1062	819	1966	1439	3	4	4
WBGene00000670	col-95	32810	37307	13366	16200	3271	6474	4279
WBGene00000671	col-96	625	608	797	939	253	473	210
WBGene00000672	col-97	51	41	76	43	59	58	38
WBGene00000673	col-98	13735	11357	16874	13415	56	43	34
WBGene00000674	col-99	392	274	558	363	379	339	244
WBGene00000675	col-101	110521	95318	87492	75301	286	182	136
WBGene00000676	col-102	0	0	0	0	0	2	0
WBGene00000677	col-103	11173	9904	14022	11981	122	158	106
WBGene00000678	col-104	69	59	92	60	26	29	25
WBGene00000679	col-105	2	0	1	2	1	1	1
WBGene00000680	col-106	71428	63849	65391	58419	7597	10636	7897
WBGene00000681	col-107	71	45	102	33	13	12	9
WBGene00000682	col-108	6	2	2	1	5	3	2
WBGene00000683	col-109	17	19	37	15	12	12	22
WBGene00000684	col-110	15	8	11	9	5	8	9
WBGene00000685	col-111	242	167	229	230	360	372	291
WBGene00000687	col-113	50	30	59	42	68	87	80
WBGene00000688	col-114	3	2	1	1	1	2	0
WBGene00000689	col-115	6	14	14	4	86	39	107
WBGene00000690	col-116	139	79	83	68	53	71	43
WBGene00000691	col-117	1	1	3	4	0	0	2
WBGene00000692	col-118	981	788	1029	967	107	123	86
WBGene00000693	col-119	135496	120263	128673	118993	3545	4815	3327
WBGene00000694	col-120	34	10	18	21	15	27	17
WBGene00000695	col-121	181	64	470	198	53	64	60
WBGene00000696	col-122	148443	137279	137435	125885	4132	6388	3562
WBGene00000697	col-123	2	4	2	1	1	4	1
WBGene00000698	col-124	47731	35318	76117	57017	114	70	91
WBGene00000699	col-125	75	59	110	32	21	15	14
WBGene00000700	col-126	0	0	0	0	0	0	0
WBGene00000701	col-127	0	0	0	0	0	0	0
WBGene00000702	col-128	3	1	3	4	26	30	14
WBGene00000703	col-129	746	567	1733	955	89	101	75
WBGene00000704	col-130	16	16	38	14	4871	3845	19909
WBGene00000705	col-131	2	0	8	4	2	1	2
WBGene00000706	col-132	26	15	27	26	19	39	24
WBGene00000707	col-133	19	14	58	24	6	10	3
WBGene00000708	col-135	1271	1222	1643	1633	38	24	12
WBGene00000709	col-136	11	5	12	11	0	0	2
WBGene00000710	col-137	5	0	6	2	7	8	7
WBGene00000711	col-138	5	10	10	9	13	23	27
WBGene00000712	col-139	608	572	1377	812	6	4	3
WBGene00000713	col-140	92953	83762	94641	86516	914	774	488
WBGene00000714	col-141	18	14	17	11	0	0	1
WBGene00000715	col-142	2592	2178	4339	3775	44	64	37
WBGene00000716	col-143	59969	56102	55580	51670	954	753	575
WBGene00000717	col-144	141	139	153	150	3	2	0
WBGene00000718	col-145	1	0	3	1	0	0	0
WBGene00000719	col-146	2	3	19	1	0	1	0
WBGene00000720	col-147	48	26	97	51	4	1	0
WBGene00000721	col-148	2	1	1	1	2	0	1
WBGene00000722	col-149	55	41	40	16	5	1	1
WBGene00000723	col-150	250	184	226	207	12	30	20
WBGene00000724	col-151	15	8	25	17	30	38	54
WBGene00000725	col-152	3	2	1	1	4	9	8
WBGene00000726	col-153	312	265	471	308	120	177	146
WBGene00000727	col-154	8	5	10	6	11	2	2
WBGene00000728	col-155	633	465	618	494	28	31	13
WBGene00000729	col-156	7	11	12	9	0	5	3
WBGene00000730	col-157	11	7	5	9	12	5	2
WBGene00000731	col-158	521	323	124	81	39	27	10
WBGene00000732	col-159	909	693	1206	890	4	0	1
WBGene00000733	col-160	27736	25391	32200	27708	134	136	162
WBGene00000734	col-161	1	1	16	1	2	1	1
WBGene00000735	col-162	30	20	27	33	14	8	7
WBGene00000736	col-163	3	3	1	3	3	1	5
WBGene00000737	col-164	2	7	3	3	10	19	9
WBGene00000738	col-165	117	58	284	91	4	9	2
WBGene00000739	col-166	715	572	670	540	38	120	35
WBGene00000740	col-167	19	5	30	5	4	3	0
WBGene00000741	col-168	6	3	9	5	1	0	0
WBGene00000742	col-169	6	1	11	2	7	5	6
WBGene00000743	col-170	0	0	1	1	0	0	0
WBGene00000744	col-171	1	0	0	0	1	0	0
WBGene00000745	col-172	2	3	17	1	1	4	6
WBGene00000746	col-173	7	6	17	11	36	34	39
WBGene00000747	col-174	7	4	14	5	0	1	3
WBGene00000748	col-175	4	2	7	2	3	1	1
WBGene00000749	col-176	38	26	26	22	3	1	0
WBGene00000750	col-177	11	7	23	15	10	22	5
WBGene00000751	col-178	41716	37505	41202	38353	248	200	114
WBGene00000752	col-179	9742	7010	12708	7731	44	57	37
WBGene00000753	col-180	40	41	43	21	12	14	7
WBGene00000754	col-181	104672	98406	96967	91266	5409	8298	5493
WBGene00000755	col-182	3	1	3	5	0	1	0
WBGene00000756	col-183	2	1	0	3	18	10	16
WBGene00000757	col-184	64049	57644	57699	53696	1467	2509	752
WBGene00000758	col-185	1	1	0	0	0	1	1
WBGene00000759	col-186	19	18	33	33	41	70	33
WBGene00000760	col-187	10	20	15	12	15	28	17
WBGene00000761	coq-1	1248	1129	1053	1030	992	1127	485
WBGene00000762	coq-2	1232	1126	991	1194	1739	1521	1555
WBGene00000763	coq-3	1245	1072	1030	1051	1631	1680	1545
WBGene00000764	coq-4	1045	902	896	947	1874	2238	2650
WBGene00000765	coq-5	3634	2966	2802	2820	2197	1801	1552
WBGene00000766	coq-6	1638	1543	1487	1489	2469	2400	1924
WBGene00000767	coq-8	4432	4236	3971	4298	5191	5199	3529
WBGene00000768	cor-1	438	413	429	430	191	325	264
WBGene00000770	cpb-1	2221	2455	1670	2028	2160	2783	1225
WBGene00000771	cpb-2	25	18	44	31	98	181	61
WBGene00000772	cpb-3	9696	10424	7588	9062	5911	5816	2937
WBGene00000773	cpf-1	6160	5488	4605	4977	3779	3205	2597
WBGene00000774	cpf-2	4791	4622	3929	4563	6065	6764	5956
WBGene00000775	cpin-1	262	188	233	151	248	383	346
WBGene00000776	cpl-1	100925	99598	85437	89186	71613	77457	63520
WBGene00000777	cpn-1	13455	12266	10855	11520	10128	9189	6833
WBGene00000778	cpn-2	135	90	179	108	97	109	46
WBGene00000779	cpn-3	6513	5090	7359	6934	1177	1156	3711
WBGene00000780	cpn-4	1561	1329	1592	1413	3707	4779	4130
WBGene00000781	cpr-1	11913	10792	12475	12462	446	179	212
WBGene00000782	cpr-2	10	3	5	4	54	27	49
WBGene00000783	cpr-3	308	206	997	804	887	1349	825
WBGene00000784	cpr-4	14293	10863	21607	16437	1124	2994	454
WBGene00000785	cpr-5	12790	11337	15927	15790	1780	4185	3087
WBGene00000786	cpr-6	56537	52155	47665	50142	15552	15505	12184
WBGene00000787	cps-6	2608	2357	2374	2425	8269	8392	10188
WBGene00000788	cpz-1	35733	32127	27272	28013	18396	26087	22918
WBGene00000789	cpz-2	3355	2584	2952	2874	10041	15663	12011
WBGene00000792	crb-1	596	437	760	562	1894	2144	882
WBGene00000793	crh-1	3639	3566	3192	3555	3226	4108	2578
WBGene00000794	crn-1	10630	10285	8561	9630	8701	8640	5811
WBGene00000795	crn-2	822	753	712	735	3656	4216	4129
WBGene00000796	crn-3	10120	9665	7966	8728	13206	14963	11588
WBGene00000797	crn-4	948	888	799	926	1680	1851	1508
WBGene00000798	crn-5	1406	1192	1005	1007	1694	1638	1411
WBGene00000799	crn-6	370	295	471	448	456	469	315
WBGene00000800	cars-1	9959	10449	8834	9998	14889	16228	18004
WBGene00000801	cars-2	200	165	258	204	343	588	340
WBGene00000802	crt-1	100267	91202	85199	81174	171007	237362	251895
WBGene00000803	csb-1	1741	1920	1416	1792	3162	3207	2033
WBGene00000804	csc-1	5200	4943	4189	4521	2835	3267	2550
WBGene00000812	csk-1	5275	5111	4355	4683	5729	6829	4633
WBGene00000813	csn-1	5998	5730	4819	5213	3412	3183	2156
WBGene00000814	csn-2	10889	9637	8903	9148	19047	21249	21513
WBGene00000815	csn-3	7756	6815	5930	6244	5107	4723	3211
WBGene00000816	csn-4	6483	6506	5544	6008	6571	7112	4852
WBGene00000817	csn-5	5361	4834	4207	4763	5401	5568	4945
WBGene00000818	csn-6	5585	5791	4556	5276	6536	6566	4763
WBGene00000819	csp-1	43	30	20	46	49	56	31
WBGene00000820	csp-2	14	13	18	15	94	85	56
WBGene00000821	csp-3	3	1	2	1	0	3	1
WBGene00000822	csq-1	4832	4064	4784	4664	359	350	384
WBGene00000829	ctb-1	0	0	0	0	0	0	0
WBGene00000830	ctl-1	123	138	245	260	201	251	352
WBGene00000831	ctl-2	3639	3188	5345	5323	2203	3930	2761
WBGene00000832	ctn-1	1456	1234	1492	1319	3776	4691	3598
WBGene00000833	cts-1	41770	43725	43144	47713	110292	181664	221986
WBGene00000834	cua-1	7652	7511	6540	7103	7292	7569	5109
WBGene00000835	cuc-1	1503	1176	1641	1477	4572	2894	3752
WBGene00000836	cul-1	14559	14763	11993	13675	7054	8551	5636
WBGene00000837	cul-2	14593	15821	12235	14066	11665	13732	9944
WBGene00000838	cul-3	14420	16234	12488	14763	9905	13003	7183
WBGene00000839	cul-4	3968	3669	3157	3214	4167	4397	2680
WBGene00000840	cul-5	3514	3375	2919	3053	3390	3941	1771
WBGene00000841	cul-6	414	332	599	534	398	638	418
WBGene00000843	cup-2	9498	8045	6715	6927	9200	9263	8426
WBGene00000845	cup-4	301	212	301	300	169	489	119
WBGene00000846	cup-5	6117	5786	4760	5270	5954	5538	3463
WBGene00000851	cut-1	7	7	5	5	14	12	9
WBGene00000853	cut-6	45	33	93	40	12	26	5
WBGene00000854	cux-7	2588	2419	1839	2060	1603	1446	903
WBGene00000857	cwn-1	267	218	373	226	1188	1908	1312
WBGene00000858	cwn-2	187	103	216	153	192	278	169
WBGene00000859	cwp-1	0	0	0	0	1	0	0
WBGene00000860	cwp-2	3	2	1	1	12	12	14
WBGene00000861	cwp-3	0	0	0	2	2	4	1
WBGene00000862	cwp-4	41	27	35	38	55	59	52
WBGene00000863	cya-1	6816	6344	5757	6211	5797	6257	2949
WBGene00000864	cya-2	45	29	24	43	62	94	54
WBGene00000865	cyb-1	30056	28969	24360	26844	21227	20890	15730
WBGene00000866	cyb-2.1	9639	8755	6532	7879	6208	4940	3457
WBGene00000867	cyb-2.2	17000	15675	11822	13606	9058	6775	4492
WBGene00000868	cyb-3	80898	76448	65276	71017	47187	45001	34566
WBGene00000869	cyc-1	18393	16913	15903	16557	16868	19029	16864
WBGene00000870	cyd-1	1135	891	1315	1180	1934	3128	1690
WBGene00000871	cye-1	7369	7960	5678	7251	5397	5501	2669
WBGene00000872	cyk-1	4179	4276	4087	4427	2414	3689	1934
WBGene00000874	cyk-3	4728	4761	3944	4305	5220	5836	4347
WBGene00000875	cyk-4	13337	14448	11270	13037	10258	12865	9233
WBGene00000876	cyl-1	7046	6655	5365	6096	8690	8636	7180
WBGene00000877	cyn-1	6296	5293	4915	5120	3865	3000	3242
WBGene00000878	cyn-2	141	116	108	129	237	271	380
WBGene00000879	cyn-3	12157	10468	9603	10419	7100	8141	8831
WBGene00000880	cyn-4	4386	4082	3371	3695	3636	3911	2444
WBGene00000881	cyn-5	21139	17443	19815	18760	30364	38689	41386
WBGene00000882	cyn-6	1256	836	1400	1002	555	570	377
WBGene00000883	cyn-7	82668	77338	64677	72276	36044	39582	42726
WBGene00000884	cyn-8	4382	3841	3656	3691	4310	3873	2135
WBGene00000885	cyn-9	2875	2608	2052	2373	2502	2075	1579
WBGene00000886	cyn-10	1431	1216	1115	1101	2505	2247	1941
WBGene00000887	cyn-11	1869	1502	1502	1426	2059	1746	1715
WBGene00000888	cyn-12	3761	3238	2932	3038	5688	4832	4717
WBGene00000889	cyn-13	6166	5329	5085	5189	9544	11050	11263
WBGene00000890	sig-7	3538	3300	2973	3108	3234	2981	2384
WBGene00000891	cyn-15	5043	5048	4235	4640	3055	3210	1883
WBGene00000892	cyn-16	3208	3057	2590	2864	2779	3094	1745
WBGene00000893	cyn-17	15	11	50	19	4	10	4
WBGene00000894	dab-1	22928	24167	19369	22780	11531	14116	8890
WBGene00000895	dac-1	54	48	59	52	92	201	126
WBGene00000896	dad-1	10444	8085	7722	7731	8390	7842	7585
WBGene00000897	daf-1	3498	3210	2716	3114	1977	2140	1480
WBGene00000898	daf-2	9997	10933	9058	10746	8013	10370	6301
WBGene00000899	daf-3	1988	1764	2034	2116	1780	2139	1420
WBGene00000900	daf-4	2930	3155	2535	2875	1972	2257	1533
WBGene00000901	daf-5	2962	2915	2832	2932	2683	3212	2339
WBGene00000902	daf-6	59	33	54	45	40	77	48
WBGene00000903	daf-7	241	262	352	349	837	881	1090
WBGene00000904	daf-8	1256	1147	1427	1588	2699	3390	2319
WBGene00000905	daf-9	55	65	49	38	60	128	73
WBGene00000906	daf-10	45	30	65	56	69	79	65
WBGene00000907	daf-11	23	32	32	30	45	65	42
WBGene00000908	daf-12	773	723	895	883	1340	1733	1461
WBGene00000910	daf-14	1151	906	1134	1171	1300	1867	1104
WBGene00000911	daf-15	10214	9971	8285	9427	9812	11760	6535
WBGene00000912	daf-16	7516	7417	6704	7257	9461	12410	8102
WBGene00000913	daf-18	48404	48532	35952	41884	22249	20459	11562
WBGene00000914	daf-19	1728	1644	1396	1580	1425	1555	977
WBGene00000915	daf-21	174604	195039	145242	171757	487434	513589	628200
WBGene00000917	daf-25	2022	1810	1558	1665	1616	1670	1083
WBGene00000920	daf-28	75	47	87	84	77	124	133
WBGene00000928	dao-2	886	330	1360	656	166	158	172
WBGene00000929	dao-3	2081	1828	1843	1716	1906	2047	2215
WBGene00000930	dao-4	5	1	6	0	1	1	1
WBGene00000931	dao-5	13244	13458	11845	12533	18439	24008	22477
WBGene00000932	dao-6	57	64	89	118	30204	13135	22996
WBGene00000933	dap-3	2632	2569	2192	2353	2566	2560	1927
WBGene00000934	dat-1	35	25	31	40	29	27	26
WBGene00000935	daz-1	14913	16702	11900	14133	8783	9677	5014
WBGene00000936	dbl-1	388	370	389	388	762	714	539
WBGene00000937	dbr-1	3025	2846	2308	2606	3411	3597	2545
WBGene00000938	dcp-66	6330	6710	5831	6567	6520	8092	3641
WBGene00000939	dcr-1	9279	9767	8009	8855	5804	7209	3124
WBGene00000940	dcs-1	3406	3060	2435	2722	2750	2815	2589
WBGene00000941	ddp-1	2893	2414	2398	2391	2485	2126	2433
WBGene00000942	deb-1	3256	2949	4080	3759	1528	2161	2084
WBGene00000950	deg-1	98	95	108	93	109	135	47
WBGene00000951	deg-3	75	66	88	64	330	372	312
WBGene00000952	del-1	25	20	20	32	26	48	30
WBGene00000953	del-2	51	29	64	41	66	50	47
WBGene00000955	des-2	95	89	92	105	343	496	414
WBGene00000958	dgk-1	244	199	295	257	212	329	245
WBGene00000959	dgk-2	1827	1538	1574	1644	2061	2940	2221
WBGene00000960	dgk-3	15	10	30	15	29	20	23
WBGene00000961	dgn-1	1697	1345	2120	1719	3437	3244	3020
WBGene00000962	dhc-1	26247	29021	23317	28654	19777	27266	14646
WBGene00000963	dhp-1	1538	1517	1382	1334	928	1462	1116
WBGene00000964	dhp-2	254	237	282	232	176	238	132
WBGene00000965	dhs-1	2999	2586	2288	2364	2894	2818	2625
WBGene00000966	dhs-2	1130	960	903	997	245	376	204
WBGene00000967	dhs-3	2558	1975	2833	2530	377	454	299
WBGene00000968	dhs-4	77	67	71	58	69	73	51
WBGene00000969	dhs-5	369	341	381	369	1285	1023	499
WBGene00000970	dhs-6	5897	5403	6426	6814	4380	4248	4099
WBGene00000971	dhs-7	102	76	109	135	7	5	12
WBGene00000972	dhs-8	73	51	61	51	865	406	545
WBGene00000973	dhs-9	1426	1244	1527	1638	4600	3886	4543
WBGene00000974	dhs-11	1442	1240	1121	1162	1442	1468	1708
WBGene00000975	dhs-12	1808	1494	1289	1422	1494	1567	1944
WBGene00000976	dhs-13	6982	6744	5760	6302	8084	8523	6906
WBGene00000977	dhs-14	550	457	631	556	306	490	573
WBGene00000978	dhs-15	33	21	25	30	26	39	25
WBGene00000979	dhs-16	35	41	60	43	54	38	31
WBGene00000980	dhs-17	809	801	700	823	1229	1181	1071
WBGene00000981	dhs-18	3798	2822	4987	4892	1671	2454	3385
WBGene00000982	dhs-19	2120	1641	1725	1662	1954	2342	1659
WBGene00000983	dhs-20	208	169	299	255	33	35	18
WBGene00000984	dhs-21	819	663	933	814	278	518	196
WBGene00000985	dhs-22	11094	9184	10269	10127	13055	12648	11595
WBGene00000986	dhs-23	37	25	33	22	9	12	9
WBGene00000987	dhs-24	3418	3017	2786	2794	4863	4648	4084
WBGene00000988	dhs-25	5635	4374	4304	4300	560	610	354
WBGene00000989	dhs-26	34	24	43	52	10	8	2
WBGene00000990	dhs-27	501	380	473	437	465	355	318
WBGene00000991	dhs-28	6299	5313	8197	8313	4885	4986	7261
WBGene00000992	dhs-29	347	238	338	277	294	372	197
WBGene00000993	dhs-30	2535	2162	2285	2390	2616	2924	2828
WBGene00000994	dic-1	3727	3488	2922	3150	2273	2124	1255
WBGene00000995	die-1	5762	5583	5968	6261	5657	6136	3258
WBGene00000996	dif-1	7789	6885	7385	7592	6855	6604	5191
WBGene00000998	dig-1	1876	1666	1581	2110	1315	1887	1358
WBGene00001000	dim-1	5976	4971	7627	7031	1420	1463	1220
WBGene00001001	dis-3	6470	6087	5022	5626	5303	5473	2921
WBGene00001002	div-1	7040	6722	5763	6501	4301	4655	2818
WBGene00001005	dlc-1	26282	21797	20018	20640	15239	14362	15095
WBGene00001006	dlg-1	3278	2480	4572	3634	2612	5745	3162
WBGene00001007	dli-1	3844	3875	3345	3754	3891	5247	4485
WBGene00001008	dlk-1	3146	2927	3168	3354	3715	5622	4059
WBGene00001016	dna-2	4932	5030	3911	4614	2935	3018	1920
WBGene00001017	dnc-1	7678	7660	6731	7405	8563	11387	7442
WBGene00001018	dnc-2	5134	4175	4002	3947	8217	8812	9466
WBGene00001019	dnj-1	4855	4519	3885	4161	4743	4994	3094
WBGene00001020	dnj-2	2044	1753	1609	1660	1151	933	638
WBGene00001021	dnj-3	602	515	416	483	463	402	371
WBGene00001022	dnj-4	922	747	729	735	637	566	336
WBGene00001023	dnj-5	25639	24624	19785	21907	19805	22748	13684
WBGene00001025	dnj-7	3625	3202	2684	2478	3292	3986	2532
WBGene00001026	dnj-8	7293	6632	5675	6161	7598	7615	4334
WBGene00001027	dnj-9	3155	2927	2562	2804	2498	2261	1586
WBGene00001028	dnj-10	3096	2880	2378	2663	3219	3609	2133
WBGene00001029	dnj-11	15833	15144	12602	13606	10386	10131	6286
WBGene00001030	dnj-12	22143	20931	16954	18731	31794	37955	35465
WBGene00001031	dnj-13	12332	12430	9083	10364	6283	10889	5449
WBGene00001032	dnj-14	2688	2428	2234	2305	3586	4463	3198
WBGene00001033	dnj-15	2537	2071	1890	1934	2646	2078	1841
WBGene00001034	dnj-16	4680	3817	4140	4027	4307	4650	3486
WBGene00001035	dnj-17	3494	3334	2483	2987	1632	1621	742
WBGene00001036	dnj-18	1651	1335	1305	1355	1401	1364	778
WBGene00001037	dnj-19	20104	20173	16233	17916	27618	32252	31820
WBGene00001038	dnj-20	11728	11127	10457	10782	18029	24541	17837
WBGene00001039	dnj-21	744	615	596	575	680	576	568
WBGene00001040	dnj-22	4952	4043	3678	3594	4180	4133	2948
WBGene00001041	dnj-23	6017	5159	4658	4789	5248	5020	3697
WBGene00001042	dnj-24	404	407	347	319	2155	3471	2454
WBGene00001043	dnj-25	4108	4600	3460	4059	2724	3479	2067
WBGene00001044	dnj-26	1431	1110	1050	1078	1701	1074	1341
WBGene00001045	dnj-27	2903	2542	2831	2961	3257	4261	2770
WBGene00001046	dnj-28	3174	3204	2548	2929	1429	1617	956
WBGene00001047	dnj-29	12834	13014	11464	12397	10405	14770	11138
WBGene00001048	dnj-30	3415	3037	2570	2763	2813	2543	1691
WBGene00001049	dog-1	3423	3636	2895	3407	4137	5253	3393
WBGene00001050	dom-3	1290	1192	994	995	1706	1807	1227
WBGene00001051	cks-1	13405	10794	9773	10250	11793	11120	7691
WBGene00001052	dop-1	49	31	57	39	69	99	50
WBGene00001053	dop-2	180	170	185	193	142	188	122
WBGene00001054	dpf-1	215	228	244	244	123	286	152
WBGene00001055	dpf-2	981	993	1232	1109	930	1899	608
WBGene00001056	dpf-3	14153	14195	11399	12921	10347	11453	7584
WBGene00001057	dpf-4	5353	5475	4719	5186	6764	7651	5286
WBGene00001058	dpf-5	12490	14072	11061	13497	11814	16162	17415
WBGene00001059	dpf-6	257	278	174	124	246	91	194
WBGene00001060	dpf-7	4441	4249	3498	3936	2382	2580	1473
WBGene00001061	dpl-1	5196	5085	4062	4762	3311	3325	2240
WBGene00001062	dpr-1	1	1	0	0	0	1	0
WBGene00001063	dpy-1	83	76	133	94	925	1163	483
WBGene00001064	dpy-2	277	113	633	251	40	34	32
WBGene00001065	dpy-3	233	112	530	250	12	12	9
WBGene00001066	dpy-4	15	8	28	10	7	8	7
WBGene00001067	dpy-5	8	3	14	4	435	349	393
WBGene00001068	dpy-6	46	68	46	83	35	83	58
WBGene00001069	dpy-7	260	85	625	270	2	1	4
WBGene00001070	dpy-8	14	13	18	7	229	168	308
WBGene00001071	dpy-9	64	34	41	22	111	93	127
WBGene00001072	dpy-10	626	299	1226	615	30	14	16
WBGene00001073	dpy-11	7500	6749	6623	6635	10632	12217	8562
WBGene00001074	dpy-13	33	25	36	19	11	32	32
WBGene00001075	dpy-14	2674	1086	5204	2457	308	750	500
WBGene00001076	dpy-17	3573	1899	7007	3379	1008	1315	954
WBGene00001077	dpy-18	2332	2129	2280	2215	3990	5573	4091
WBGene00001078	dpy-19	540	420	356	376	284	266	175
WBGene00001079	dpy-20	4	2	6	3	16	6	12
WBGene00001080	dpy-21	5364	5065	4790	4987	4069	5615	2662
WBGene00001081	dpy-22	6438	6197	6168	6764	5561	7410	3188
WBGene00001082	dpy-23	3045	2769	2907	3063	2493	3172	2075
WBGene00001085	dpy-26	8403	8502	7251	7838	6827	8458	5098
WBGene00001086	dpy-27	5634	5360	5061	5260	4650	6761	4153
WBGene00001087	dpy-28	9027	9657	8166	9488	6016	7362	4790
WBGene00001088	dpy-30	10288	9132	8118	8506	11947	12070	10946
WBGene00001089	dre-1	2454	1920	2083	1886	843	862	617
WBGene00001090	drh-1	3056	3098	2442	2524	1881	2322	1296
WBGene00001091	drh-2	1241	909	944	1114	2686	2939	1110
WBGene00001092	dro-1	4027	3578	2894	3292	4053	3767	2709
WBGene00001093	drp-1	11612	12348	9258	11057	10509	12937	7820
WBGene00001094	dars-1	13797	14334	11957	13614	22469	24507	23343
WBGene00001095	dars-2	1736	1597	1172	1424	853	789	408
WBGene00001096	dsc-1	8	2	5	3	5	6	4
WBGene00001099	dsc-4	4170	3878	2463	2329	854	1652	863
WBGene00001101	dsh-1	1753	1517	1736	1629	2262	2854	1675
WBGene00001102	dsh-2	9184	8316	7105	7971	8416	8699	5915
WBGene00001103	dsl-1	744	573	541	562	243	153	112
WBGene00001104	dsl-2	5308	4639	4380	4481	2880	2513	1822
WBGene00001105	dsl-3	295	151	353	221	576	688	523
WBGene00001106	dsl-4	3	2	1	2	3	2	0
WBGene00001107	dsl-5	7	5	6	1	192	326	231
WBGene00001108	dsl-6	61	21	139	63	8	8	10
WBGene00001109	dsl-7	13	4	18	9	2	6	2
WBGene00001110	duo-1	2397	2406	1766	2019	1766	1650	1074
WBGene00001111	duo-2	10	9	8	11	10	27	22
WBGene00001112	duo-3	6978	6751	5433	6089	4785	4623	2566
WBGene00001113	dur-1	378	393	517	540	516	894	1018
WBGene00001115	dyb-1	345	255	346	320	916	904	721
WBGene00001116	dyc-1	326	293	344	331	516	615	354
WBGene00001117	dyf-1	57	51	80	60	187	223	127
WBGene00001118	dyf-2	173	146	205	196	318	400	382
WBGene00001119	dyf-3	255	241	152	236	496	733	469
WBGene00001121	dyf-5	35	17	65	35	33	53	36
WBGene00001122	dyf-6	40	27	38	27	123	153	122
WBGene00001123	dyf-7	126	66	208	126	50	89	61
WBGene00001127	dyf-11	24	27	61	49	101	121	84
WBGene00001129	dyf-13	10	7	17	13	29	44	43
WBGene00001130	dyn-1	5186	6344	5078	6064	3275	4775	2752
WBGene00001131	dys-1	3074	2786	3059	2865	3245	4081	2236
WBGene00001132	alp-1	2223	1781	3440	3041	885	1969	1252
WBGene00001133	eat-2	36	29	41	35	104	116	97
WBGene00001134	eat-3	6587	6392	5380	5709	4195	4650	2428
WBGene00001135	eat-4	88	62	63	75	237	286	199
WBGene00001136	eat-5	43	31	33	26	152	113	104
WBGene00001137	eat-6	43836	45652	39595	43467	37492	42617	33804
WBGene00001145	eat-16	854	732	844	824	790	1084	699
WBGene00001147	eat-18	0	0	0	0	0	0	0
WBGene00001148	eat-20	2930	2808	2456	2799	2373	2435	1267
WBGene00001149	bcat-1	8605	8390	9159	9737	8047	8980	8489
WBGene00001150	ech-1	206	153	294	245	396	588	462
WBGene00001151	ech-2	1374	1213	1129	1136	1094	893	708
WBGene00001152	ech-3	534	415	537	502	1333	1637	1722
WBGene00001153	ech-4	6055	5750	5494	5758	3947	4193	3276
WBGene00001154	ech-5	1731	1630	1515	1576	1179	1170	1020
WBGene00001155	ech-6	23240	19454	21587	20152	5459	5480	3944
WBGene00001156	ech-7	1927	1621	1469	1508	702	531	523
WBGene00001157	ech-8	676	507	656	676	296	707	417
WBGene00001158	ech-9	123	108	91	82	33	45	11
WBGene00001159	eff-1	128	143	139	366	323	680	490
WBGene00001160	efk-1	9027	9057	7813	8975	16263	18082	14060
WBGene00001161	efl-1	5034	4729	3938	4359	4090	4542	2643
WBGene00001162	efl-2	2077	2044	1607	1831	1762	1868	1150
WBGene00001163	efn-2	228	138	273	177	117	175	122
WBGene00001164	efn-3	104	91	110	92	23	30	17
WBGene00001165	efn-4	1299	1070	1354	1309	717	725	451
WBGene00001166	eftu-2	16629	16975	14013	15454	23512	26609	23989
WBGene00001167	eef-2	198463	224688	185943	213229	325967	373174	372374
WBGene00001168	eef-1A.1	593113	618953	523810	586117	637816	648638	684707
WBGene00001169	eef-1A.2	33114	31187	34824	35337	106832	151147	158487
WBGene00001170	egl-1	80	49	63	56	273	333	221
WBGene00001171	egl-2	115	84	156	118	198	196	180
WBGene00001172	egl-3	4004	3631	4453	4587	5953	8358	6845
WBGene00001173	egl-4	24314	24869	20469	22606	19872	25066	16561
WBGene00001174	egl-5	88	46	79	57	229	267	206
WBGene00001175	egl-6	546	509	366	423	385	248	271
WBGene00001177	egl-8	3663	3438	4136	4398	4885	9356	5755
WBGene00001178	egl-9	1599	1411	1284	1366	3743	4386	2557
WBGene00001179	egl-10	849	751	842	806	908	1167	942
WBGene00001182	egl-13	203	147	429	335	179	240	202
WBGene00001184	egl-15	759	625	934	694	671	1327	686
WBGene00001185	egl-17	18	12	18	10	11	7	8
WBGene00001186	egl-18	5449	5163	4644	5085	3881	3402	2274
WBGene00001187	egl-19	848	777	974	870	1112	1977	1410
WBGene00001188	egl-20	205	189	172	219	448	416	453
WBGene00001189	egl-21	3459	3073	3834	3730	4406	6000	5363
WBGene00001190	egl-23	207	166	185	190	238	273	239
WBGene00001193	egl-26	1218	1087	1052	1082	876	878	610
WBGene00001194	egl-27	12431	12564	10807	12634	11893	15355	8482
WBGene00001196	egl-30	6369	5451	6199	5675	4293	5989	3324
WBGene00001202	egl-36	125	97	125	140	131	240	141
WBGene00001204	egl-38	41	27	63	37	58	90	55
WBGene00001207	egl-43	200	126	364	298	627	1275	829
WBGene00001208	egl-44	1938	1634	2195	2132	1782	3015	2019
WBGene00001209	egl-45	22836	25722	21047	23734	26988	31757	34556
WBGene00001210	egl-46	305	127	636	300	29	45	41
WBGene00001211	egl-47	16	13	18	20	29	43	31
WBGene00001214	ego-1	5216	5266	4025	4718	4911	4932	2629
WBGene00001215	ego-2	5473	6086	5000	5648	3261	5938	3418
WBGene00001223	ehn-3	1	1	8	3	2	0	1
WBGene00001224	ehs-1	4127	4282	3542	4015	3791	4638	2928
WBGene00001225	eif-3.B	15309	17132	14077	15863	24604	29430	28947
WBGene00001226	eif-3.C	18647	19611	15426	17308	11260	10931	8184
WBGene00001227	eif-3.D	8202	8234	6867	7893	13472	14948	15056
WBGene00001228	eif-3.E	9309	9407	8333	9147	8679	9052	9270
WBGene00001229	eif-3.F	9753	9100	8037	8649	12189	12796	12369
WBGene00001230	eif-3.G	6886	6338	5416	5742	12823	14179	16912
WBGene00001231	eif-3.H	5474	5531	4541	5121	3832	3526	2777
WBGene00001232	eif-3.I	9193	9343	8315	9047	12834	12954	14492
WBGene00001233	eif-3.K	6086	5894	4969	5307	4784	4857	4301
WBGene00001234	eif-6	5500	5476	4493	5000	7945	9063	7667
WBGene00001235	elb-1	1806	1714	1551	1560	1385	1390	1073
WBGene00001236	elc-1	3096	2872	2687	2805	2262	2645	2255
WBGene00001237	elc-2	8	5	8	6	10	13	13
WBGene00001239	elo-1	21206	17608	15051	15066	20204	16472	13810
WBGene00001240	elo-2	4832	4102	2306	2175	967	935	596
WBGene00001241	elo-3	5434	5009	4234	4589	4679	4467	3123
WBGene00001242	elo-4	56	41	53	41	153	161	162
WBGene00001243	elo-5	1847	1306	1042	728	382	396	188
WBGene00001244	elo-6	4426	2524	2728	1504	1106	1015	679
WBGene00001245	elo-7	1	2	2	4	8	9	8
WBGene00001246	elo-8	17	18	19	21	174	175	104
WBGene00001247	elo-9	221	169	167	202	65	66	77
WBGene00001248	elp-1	339	287	361	321	247	438	319
WBGene00001249	elt-1	1319	1064	1207	1040	847	978	465
WBGene00001250	elt-2	269	160	415	306	129	193	106
WBGene00001251	elt-3	673	451	671	335	382	489	438
WBGene00001252	elt-4	9	3	13	6	1	14	2
WBGene00001253	elt-6	439	339	453	380	385	379	260
WBGene00001258	emb-4	13044	15082	11678	13636	7795	9861	6433
WBGene00001259	emb-5	24594	25068	20493	22894	23396	26690	16542
WBGene00001262	emb-8	12198	12977	10358	12269	36065	29818	23447
WBGene00001263	emb-9	17859	16593	20878	20292	3666	4895	4430
WBGene00001281	emb-27	5468	5499	4256	4632	3431	3207	2293
WBGene00001284	emb-30	4770	4618	3761	4186	3561	4206	2018
WBGene00001303	emo-1	7450	5660	6124	5482	7245	6891	7574
WBGene00001309	emr-1	6143	5721	4725	5205	8247	8171	5722
WBGene00001310	end-1	21	10	27	25	58	68	45
WBGene00001311	end-3	26	28	23	16	31	30	32
WBGene00001320	ent-1	13586	13618	11012	12696	12017	12638	7994
WBGene00001324	eor-1	5134	4608	4030	4375	2605	2952	1517
WBGene00001325	eor-2	2078	1826	1944	1925	1704	2137	1315
WBGene00001328	epi-1	6821	5268	7129	6744	5956	12795	6479
WBGene00001329	epn-1	9127	9689	8646	10106	16064	19945	26502
WBGene00001330	eps-8	1374	1242	1806	1364	915	1415	620
WBGene00001331	erd-2	5017	4051	3926	3486	5249	6115	4223
WBGene00001332	eri-1	4212	3921	3135	3452	3653	3834	2321
WBGene00001333	erm-1	15241	16574	14173	15832	10414	12227	6616
WBGene00001334	ero-1	5852	5315	4285	4606	5004	5605	3629
WBGene00001335	erp-1	578	538	545	561	687	645	455
WBGene00001336	qars-1	11053	11625	9383	10990	13456	18357	16463
WBGene00001337	ears-1	11099	13196	10845	12566	12595	17820	15509
WBGene00001338	ears-2	1458	1215	1094	1205	899	880	592
WBGene00001340	etr-1	4854	4734	4542	4698	3655	4350	2927
WBGene00001345	fos-1	1575	1642	1798	2249	2728	4824	3469
WBGene00001352	evl-14	7946	8419	6574	7343	4573	5397	2478
WBGene00001358	evl-20	1157	1040	936	1022	1517	1527	1367
WBGene00001365	exc-4	2412	2295	2073	2324	2190	2387	1410
WBGene00001366	exc-5	581	522	820	685	995	1782	1225
WBGene00001368	exc-7	703	655	704	915	1098	1599	931
WBGene00001371	exl-1	1388	1114	1089	1067	1445	1229	1342
WBGene00001372	exo-3	6091	5529	4626	5079	3802	3635	2590
WBGene00001373	exp-1	21	9	19	27	20	28	15
WBGene00001374	exp-2	150	133	193	165	256	232	242
WBGene00001377	eya-1	632	425	791	583	1118	1242	804
WBGene00001385	far-1	37226	31569	32835	31221	30889	54404	32707
WBGene00001386	far-2	217100	190335	186193	183239	111397	132133	78136
WBGene00001387	far-3	1519	1596	1495	1608	257	161	43
WBGene00001388	far-4	23	20	22	29	29	79	21
WBGene00001389	far-5	362	279	279	202	129	195	123
WBGene00001390	far-6	4627	4260	4792	4532	7323	11324	6565
WBGene00001391	far-7	239	206	346	233	1279	2082	1343
WBGene00001392	far-8	3544	2878	3337	3070	1241	2196	766
WBGene00001393	fat-1	46954	41656	32788	34290	48517	67601	54936
WBGene00001394	fat-2	59136	50770	48640	45828	122519	54256	45181
WBGene00001395	fat-3	8157	7733	6488	7349	20070	25162	17593
WBGene00001396	fat-4	16030	12768	13164	12541	10755	13173	11028
WBGene00001397	fat-5	3216	3119	2052	2280	813	560	382
WBGene00001398	fat-6	20174	18726	15968	18271	93917	44625	77332
WBGene00001399	fat-7	3727	2510	7867	5922	145	38	53
WBGene00001400	fax-1	21	11	29	14	19	20	11
WBGene00001401	fbf-1	704	652	514	628	1224	1137	783
WBGene00001402	fbf-2	526	531	463	501	552	580	390
WBGene00001403	fbl-1	293	286	453	455	1155	1148	1683
WBGene00001404	fbp-1	6795	6725	5573	6004	3479	3274	2381
WBGene00001405	fce-1	4566	4092	3776	3962	3646	3725	2522
WBGene00001406	fce-2	1430	1213	1148	1221	620	531	319
WBGene00001410	feh-1	216	206	210	186	1199	1869	1335
WBGene00001411	fem-1	3834	3680	3123	3395	2451	2582	2004
WBGene00001412	fem-2	10361	9887	7910	8814	9415	9367	9535
WBGene00001413	fem-3	5374	4412	3680	3934	5615	4182	2827
WBGene00001414	fer-1	36	26	43	42	90	92	29
WBGene00001423	fib-1	24063	22619	19531	21582	15697	20104	14453
WBGene00001424	fis-1	2	0	5	0	0	1	0
WBGene00001425	fis-2	2530	2192	1720	1767	4260	4371	4191
WBGene00001426	fkb-1	4747	3897	3920	4120	3117	3712	2744
WBGene00001427	fkb-2	17700	15469	13833	14904	7628	8968	8544
WBGene00001428	fkb-3	1037	750	1004	823	440	640	441
WBGene00001429	fkb-4	68	33	86	35	50	47	49
WBGene00001430	fkb-5	897	644	1020	821	513	583	378
WBGene00001431	fkb-6	13968	15610	11959	14310	14653	16138	13473
WBGene00001432	fkb-7	301	162	335	191	227	313	192
WBGene00001433	fkb-8	520	399	488	488	616	955	906
WBGene00001434	fkh-2	118	49	143	75	31	51	30
WBGene00001435	fkh-3	1500	1578	1181	1447	3527	2496	1962
WBGene00001436	fkh-4	1710	1773	1310	1525	3377	2739	2176
WBGene00001437	fkh-5	233	195	131	157	244	217	169
WBGene00001438	fkh-6	132	96	141	100	184	201	191
WBGene00001439	fkh-7	2986	3178	3538	4078	7130	11832	7347
WBGene00001440	fkh-8	58	47	91	45	832	895	877
WBGene00001441	fkh-9	2949	2758	3412	3328	2778	5249	2540
WBGene00001442	fkh-10	18	10	10	27	53	64	64
WBGene00001443	fli-1	6596	6942	6736	7666	7520	9262	4462
WBGene00001444	flp-1	676	516	758	687	1363	1726	1285
WBGene00001445	flp-2	152	127	180	181	336	391	360
WBGene00001446	flp-3	230	160	221	185	463	318	233
WBGene00001447	flp-4	197	190	236	184	325	383	364
WBGene00001448	flp-5	347	327	369	379	831	859	878
WBGene00001449	flp-6	2261	1940	1754	1735	1104	1441	914
WBGene00001450	flp-7	253	156	239	220	445	500	500
WBGene00001451	flp-8	300	257	280	289	261	333	257
WBGene00001452	flp-9	1047	846	1114	986	1839	2278	2124
WBGene00001453	flp-10	663	514	725	556	1135	1732	1217
WBGene00001454	flp-11	506	376	529	464	1338	1506	1775
WBGene00001455	flp-12	445	333	463	395	611	733	686
WBGene00001456	flp-13	401	290	425	416	639	723	569
WBGene00001457	flp-14	1207	951	1256	1188	1401	1490	1147
WBGene00001458	flp-15	283	245	316	309	776	1552	1447
WBGene00001459	flp-16	541	448	532	536	1235	1417	1243
WBGene00001460	flp-17	367	256	349	322	366	441	272
WBGene00001461	flp-18	472	363	493	475	563	698	607
WBGene00001462	flp-19	366	287	383	333	507	601	420
WBGene00001463	flp-20	126	99	99	104	157	187	172
WBGene00001464	flp-21	119	108	117	127	327	401	370
WBGene00001465	flr-1	125	90	97	115	69	119	58
WBGene00001466	flr-2	75	49	91	91	84	202	289
WBGene00001468	flr-4	14	9	19	13	11	13	10
WBGene00001470	flt-1	3719	3620	3374	3508	3519	4486	2303
WBGene00001475	fmi-1	493	258	762	458	292	414	203
WBGene00001476	fmo-1	1059	846	1547	1521	247	391	107
WBGene00001477	fmo-2	60	60	94	71	148	58	35
WBGene00001478	fmo-3	312	269	226	279	401	415	688
WBGene00001479	fmo-4	1174	1370	1577	2263	1387	2602	1399
WBGene00001480	fmo-5	957	850	951	1139	1021	1411	904
WBGene00001481	fog-1	1499	1451	1158	1364	2155	2466	1615
WBGene00001482	fog-2	2533	2240	1820	1955	2735	2691	2115
WBGene00001483	fog-3	18	10	15	15	98	156	87
WBGene00001484	fox-1	1740	1557	1543	1586	2152	2527	1447
WBGene00001485	fre-1	3704	3597	2859	3290	2362	2463	1726
WBGene00001486	frh-1	884	670	707	757	947	809	819
WBGene00001487	frk-1	18	7	7	11	35	66	46
WBGene00001488	frm-1	10858	11131	9693	10472	12467	16653	10813
WBGene00001489	frm-2	1368	998	1585	1252	2108	4014	3813
WBGene00001490	frm-3	353	262	299	365	330	349	273
WBGene00001491	frm-4	6198	6132	5290	5963	7188	8237	4732
WBGene00001492	frm-5.1	411	481	417	411	360	413	230
WBGene00001493	frm-7	7469	7378	7282	7769	11595	14621	12663
WBGene00001494	frm-8	510	419	438	414	1300	1394	1093
WBGene00001495	frm-9	242	200	245	218	258	295	228
WBGene00001496	frm-10	5903	5404	6315	6888	10281	12862	8540
WBGene00001497	fars-1	7377	7505	5732	6613	5791	6248	3812
WBGene00001498	fars-3	6231	6677	5624	6337	5991	6924	7143
WBGene00001499	fsn-1	7272	6668	5333	6039	9706	9134	6522
WBGene00001500	ftn-1	369	369	163	176	13699	14332	14241
WBGene00001501	ftn-2	7372	6203	7019	6743	5428	9183	7670
WBGene00001502	ftt-2	17976	17785	18309	19028	27763	33131	29415
WBGene00001503	fum-1	14769	15522	13274	14839	12689	14596	13925
WBGene00001505	fut-1	284	169	264	236	247	524	182
WBGene00001506	fut-2	9	1	17	10	0	8	2
WBGene00001507	fut-4	42	28	42	53	66	83	80
WBGene00001508	fut-8	185	140	212	142	149	226	143
WBGene00001509	fzo-1	4165	4159	3524	3891	4955	4997	4513
WBGene00001510	fzr-1	4800	4562	4534	4613	4555	5986	3635
WBGene00001511	fzy-1	14806	14136	11466	12818	8792	8737	5599
WBGene00001512	gab-1	31	13	26	38	97	78	62
WBGene00001513	gad-1	7986	7323	5953	6359	7050	6521	5234
WBGene00001514	xnd-1	6978	7158	5290	5994	4271	4912	2785
WBGene00001515	gap-1	135	94	144	117	346	355	288
WBGene00001516	gap-2	3428	3295	3138	3339	2441	2931	1916
WBGene00001517	gar-1	54	40	86	85	129	195	167
WBGene00001518	gar-2	156	99	196	154	178	349	196
WBGene00001519	gar-3	93	110	102	112	144	177	183
WBGene00001520	gas-1	6711	7176	6749	7451	8962	10252	9814
WBGene00001522	gbh-1	1337	1089	1115	1212	1378	1729	2027
WBGene00001523	gbh-2	483	420	610	599	671	1237	306
WBGene00001526	gck-1	4212	4521	4037	4325	4555	7715	3827
WBGene00001527	gcs-1	6140	6418	5389	6064	7795	9698	6059
WBGene00001528	gcy-1	2	0	1	0	2	2	2
WBGene00001529	gcy-2	1	0	1	3	0	1	0
WBGene00001530	gcy-3	1	6	10	9	9	19	10
WBGene00001531	gcy-4	2	1	5	7	5	11	6
WBGene00001532	gcy-5	17	32	16	185	37	49	25
WBGene00001533	gcy-6	7	3	5	9	6	12	8
WBGene00001534	gcy-7	5	3	5	4	9	10	8
WBGene00001535	gcy-8	29	36	46	38	43	50	20
WBGene00001536	gcy-9	32	20	36	27	11	11	11
WBGene00001537	gcy-11	544	509	459	541	1767	2257	1270
WBGene00001538	gcy-12	1484	1379	1401	1281	1163	1953	1043
WBGene00001539	gcy-13	1	0	3	2	12	7	12
WBGene00001540	gcy-14	0	1	1	2	28	14	18
WBGene00001541	gcy-15	81	62	72	73	116	140	82
WBGene00001542	gcy-17	4	3	7	5	16	32	23
WBGene00001543	gcy-18	148	107	98	121	425	361	262
WBGene00001544	gcy-19	152	151	219	222	1019	1579	1000
WBGene00001545	gcy-20	5	0	8	2	18	21	19
WBGene00001546	gcy-21	123	104	160	145	109	156	127
WBGene00001547	gcy-22	27	16	27	26	80	92	61
WBGene00001548	gcy-23	89	76	97	97	292	234	180
WBGene00001549	gcy-25	8	4	2	6	12	10	8
WBGene00001550	gcy-27	7	5	7	5	16	27	9
WBGene00001551	gcy-31	23	21	44	20	24	39	12
WBGene00001552	gcy-32	13	15	18	18	40	28	36
WBGene00001553	gcy-33	32	16	36	21	108	66	70
WBGene00001554	gcy-34	9	6	12	13	49	57	59
WBGene00001555	gcy-35	98	73	87	79	259	309	227
WBGene00001556	gcy-36	20	23	35	27	54	79	43
WBGene00001557	gcy-37	37	38	32	45	132	244	153
WBGene00001558	gdi-1	34592	35877	30871	35150	27632	34198	29283
WBGene00001559	gei-1	662	594	991	853	922	1880	1022
WBGene00001560	gei-3	755	689	766	878	674	1117	602
WBGene00001561	gei-4	11476	10998	10978	11759	9852	12843	8435
WBGene00001562	lin-66	9474	9093	8510	9441	6914	9421	4967
WBGene00001563	gei-6	6259	6180	5149	5790	3979	4734	2913
WBGene00001564	icl-1	71937	80135	78445	86526	108632	218186	115800
WBGene00001565	gei-8	4890	4986	4186	4728	3223	4182	1932
WBGene00001566	acdh-13	2301	2125	1648	1953	816	821	462
WBGene00001568	snpc-4	6468	6429	5258	5672	6015	6553	4133
WBGene00001569	gei-12	7141	7308	5439	6484	3310	2786	1805
WBGene00001570	gei-13	192	98	640	234	65	94	45
WBGene00001571	gei-14	3944	3791	3029	3559	1535	1766	832
WBGene00001572	gei-15	355	298	465	433	152	213	179
WBGene00001574	gei-17	9968	9831	8292	9380	17917	19422	11564
WBGene00001575	gei-18	12	10	8	13	7	8	5
WBGene00001577	gem-4	762	585	1348	1187	1596	2571	1715
WBGene00001578	ges-1	843	736	1039	904	324	534	178
WBGene00001579	gex-2	5520	5950	4992	5440	3215	3641	2310
WBGene00001580	gex-3	5378	5067	4300	4659	3237	3545	2210
WBGene00001581	gfi-1	3621	3558	4463	4798	311	400	166
WBGene00001582	gfi-2	11687	11015	9664	10769	11281	12712	7392
WBGene00001583	gfi-3	1976	1758	1741	1783	2735	2953	2072
WBGene00001584	nrde-4	7265	6434	5456	5767	4874	4696	3693
WBGene00001585	gfl-1	1757	1517	1322	1369	1377	1186	990
WBGene00001586	ggr-1	50	15	36	24	24	33	33
WBGene00001587	ggr-2	25	13	23	15	45	33	30
WBGene00001588	ggr-3	41	20	30	26	26	58	38
WBGene00001589	gip-1	5283	5227	4357	4744	3864	4315	2653
WBGene00001590	C45G3.3	1069	945	759	799	752	734	596
WBGene00001591	glc-1	2759	2139	2574	1724	628	1348	392
WBGene00001592	glc-2	291	245	319	174	86	90	75
WBGene00001593	glc-3	19	13	22	19	27	43	26
WBGene00001594	glc-4	108	93	125	72	153	233	158
WBGene00001595	gld-1	34100	38918	28627	34703	22419	27479	15855
WBGene00001596	gld-2	12562	14786	10569	13520	7022	9776	5202
WBGene00001597	gld-3	11725	11802	8511	10211	7213	6720	4041
WBGene00001598	glh-1	11883	14077	10403	12941	11668	17103	10573
WBGene00001599	glh-2	8417	10000	6692	8789	2719	4051	1709
WBGene00001600	glh-3	3649	3859	2848	3422	3320	3572	2057
WBGene00001601	glh-4	4261	4985	3508	4255	3749	4437	2973
WBGene00001602	gln-1	835	766	723	718	1772	1892	1509
WBGene00001603	gln-2	11	7	51	22	26	19	7
WBGene00001604	gln-3	33426	29664	25475	21517	14214	19478	13083
WBGene00001605	gln-4	2	0	0	3	4	12	8
WBGene00001606	gln-5	12937	13079	10304	12198	6565	4427	3406
WBGene00001607	gln-6	44837	43790	34225	40232	23680	19435	14886
WBGene00001608	R07B1.8	24	37	32	53	36	42	34
WBGene00001609	glp-1	13358	13041	9693	11219	8868	8259	4669
WBGene00001612	glr-1	28	25	38	47	22	38	18
WBGene00001613	glr-2	51	44	59	40	39	39	28
WBGene00001614	glr-3	13	5	5	8	9	10	7
WBGene00001615	glr-4	253	186	181	231	315	448	279
WBGene00001616	glr-5	117	130	114	108	105	158	130
WBGene00001617	glr-6	361	275	268	284	278	332	237
WBGene00001618	glr-7	16	16	23	13	23	41	19
WBGene00001619	glr-8	15	7	3	10	8	18	12
WBGene00001620	glt-1	3340	3126	3862	3691	568	1678	454
WBGene00001621	glt-3	131	106	136	139	356	325	487
WBGene00001622	glt-4	374	366	409	434	608	861	763
WBGene00001623	glt-5	184	178	187	174	229	300	242
WBGene00001624	glt-6	72	52	68	83	97	108	129
WBGene00001625	glt-7	38	28	45	39	29	54	20
WBGene00001626	gly-1	6	2	6	6	7	7	3
WBGene00001627	gly-2	649	503	564	506	304	535	293
WBGene00001628	gly-3	5743	5558	4867	5392	4751	6163	4086
WBGene00001629	gly-4	4183	3543	2867	2927	2043	2268	1396
WBGene00001630	gly-5	4935	4783	3730	4014	3695	4977	2418
WBGene00001631	gly-6	2442	1849	2439	1916	539	847	524
WBGene00001632	gly-7	7537	7247	6321	6917	3361	3695	2186
WBGene00001633	gly-8	962	979	1028	1033	503	468	335
WBGene00001635	gly-10	4873	4705	3792	4290	3448	3855	1676
WBGene00001636	gly-11	601	484	488	469	828	834	516
WBGene00001637	gly-12	296	266	270	254	289	352	192
WBGene00001638	gly-13	1332	1312	922	1245	946	1194	544
WBGene00001639	gly-14	156	160	115	138	473	365	252
WBGene00001640	gly-15	0	0	2	1	1	0	0
WBGene00001641	gly-16	1	0	0	2	1	0	0
WBGene00001642	gly-17	1	1	0	0	0	0	0
WBGene00001643	gly-18	22	15	26	11	35	38	25
WBGene00001644	gly-19	188	137	213	137	107	156	89
WBGene00001645	gly-20	8530	7363	5959	6548	10607	9594	6160
WBGene00001646	gna-1	275	197	353	283	387	644	412
WBGene00001647	gna-2	8013	6920	5819	6296	5407	3651	2538
WBGene00001648	goa-1	11389	11056	10005	10589	7724	9518	4881
WBGene00001649	gob-1	4041	3570	3468	3435	2224	3667	2149
WBGene00001650	gon-1	484	409	496	499	704	1200	346
WBGene00001651	gon-2	4277	3854	3739	3867	2666	3701	1623
WBGene00001653	gon-4	7067	6705	5429	6076	5435	5268	2714
WBGene00001660	gop-1	1815	1606	1351	1408	1367	1394	765
WBGene00001661	gop-2	3540	2827	2578	2738	4219	4282	3152
WBGene00001662	gop-3	4457	4001	3676	3859	4614	4891	3403
WBGene00001663	gpa-1	140	81	88	124	95	106	54
WBGene00001664	gpa-2	20	14	18	23	60	101	71
WBGene00001665	gpa-3	37	37	52	40	113	176	137
WBGene00001666	gpa-4	128	90	81	64	396	593	388
WBGene00001667	gpa-5	2	5	5	4	29	26	13
WBGene00001668	gpa-6	7	5	3	4	27	24	34
WBGene00001669	gpa-7	194	125	173	145	307	468	409
WBGene00001670	gpa-8	8	8	9	7	17	26	17
WBGene00001671	gpa-9	34	13	41	26	133	109	127
WBGene00001672	gpa-10	26	23	15	29	56	80	76
WBGene00001673	gpa-11	9	10	15	15	40	66	17
WBGene00001674	gpa-12	290	201	298	171	64	47	27
WBGene00001675	gpa-13	22	11	23	12	19	33	23
WBGene00001676	gpa-14	22	24	20	20	83	101	72
WBGene00001677	gpa-15	53	31	45	37	90	106	66
WBGene00001678	gpa-16	4551	4614	3562	4001	5942	6152	4305
WBGene00001679	gpb-1	14597	14584	13539	14279	9728	14221	7675
WBGene00001680	gpb-2	522	365	612	518	1022	1852	1674
WBGene00001681	gpc-1	45	39	49	44	112	233	199
WBGene00001682	gpc-2	3603	2784	3460	3148	5389	5650	6853
WBGene00001683	gpd-1	15478	16705	13331	14955	7722	7438	5719
WBGene00001684	gpd-2	13743	12789	12612	12601	21114	22334	24429
WBGene00001685	gpd-3	16209	14746	17869	17930	46247	51625	76923
WBGene00001686	gpd-4	8885	9151	6617	8136	3191	3024	2570
WBGene00001687	gpn-1	101	69	74	47	216	222	74
WBGene00001688	gpr-1	1660	1354	1239	1361	1279	1252	1003
WBGene00001689	gpr-2	2437	2110	1981	2064	1683	1689	1484
WBGene00001690	grd-1	59	48	90	65	6	32	16
WBGene00001691	grd-2	6	2	9	6	2	2	1
WBGene00001692	grd-3	5511	4854	5219	5282	16	10	3
WBGene00001693	grd-4	108	97	98	71	1	0	0
WBGene00001694	grd-5	5177	4258	4252	4268	31	18	21
WBGene00001695	grd-6	7	9	7	10	7	16	6
WBGene00001696	grd-7	4	5	3	6	10	5	4
WBGene00001697	grd-8	1	2	0	1	0	0	1
WBGene00001698	grd-9	3	3	0	4	8	10	2
WBGene00001699	grd-10	161	134	248	244	2	7	2
WBGene00001700	grd-11	30	9	18	9	84	77	56
WBGene00001701	grd-12	3	3	3	2	0	1	6
WBGene00001702	grd-13	146	122	233	178	38	12	24
WBGene00001703	grd-14	227	151	247	206	1	2	4
WBGene00001704	grd-15	4	4	6	3	13	7	8
WBGene00001705	grd-16	14	9	16	12	10	8	10
WBGene00001706	grd-17	0	1	1	0	1	0	0
WBGene00001707	grh-1	218	169	311	206	358	527	361
WBGene00001708	grk-1	2962	2719	2312	2726	1372	1604	957
WBGene00001709	grk-2	673	595	570	568	881	946	733
WBGene00001710	grl-1	15	14	31	23	60	47	52
WBGene00001711	grl-2	0	1	5	1	10	19	12
WBGene00001712	grl-3	0	1	1	1	2	5	2
WBGene00001713	grl-4	599	553	438	521	19	37	13
WBGene00001714	grl-5	5	6	38	12	1	1	2
WBGene00001715	grl-6	4	2	4	2	1	1	1
WBGene00001716	grl-7	24	8	109	33	0	2	0
WBGene00001717	grl-8	40	36	42	65	69	90	64
WBGene00001718	grl-9	5	11	8	10	14	44	23
WBGene00001719	grl-10	91	83	99	108	254	237	291
WBGene00001720	grl-11	4	1	4	1	1	1	2
WBGene00001721	grl-12	5	7	10	4	13	11	23
WBGene00001722	grl-13	4	1	0	1	4	6	3
WBGene00001723	grl-14	41	30	26	29	122	249	98
WBGene00001724	grl-15	30	11	85	38	4	8	2
WBGene00001725	grl-16	113	70	154	82	32	43	31
WBGene00001726	grl-17	21	21	22	16	35	34	27
WBGene00001727	grl-18	5	5	4	0	10	13	5
WBGene00001728	grl-19	0	0	0	0	2	2	0
WBGene00001729	grl-20	6	2	7	4	10	8	5
WBGene00001730	grl-21	4	10	13	33	17	8	5
WBGene00001731	grl-22	39	40	26	28	9	23	11
WBGene00001732	grl-23	1	0	1	0	5	2	1
WBGene00001733	grl-24	2	0	1	2	1	1	1
WBGene00001734	grl-25	7	8	13	15	18	10	4
WBGene00001735	grl-26	29	18	8	10	27	49	24
WBGene00001736	grl-27	7	4	3	8	3	5	0
WBGene00001737	grl-28	1	0	1	0	0	0	0
WBGene00001738	grl-29	0	0	0	1	1	0	0
WBGene00001739	grl-30	1	2	0	1	2	0	0
WBGene00001740	gro-1	1169	1143	979	1084	914	966	602
WBGene00001743	grp-1	6833	5802	4883	5221	6425	6238	3567
WBGene00001744	gars-1	10378	11426	8984	10120	6111	7005	5068
WBGene00001745	gsa-1	444	383	519	426	530	1243	663
WBGene00001746	gsk-3	5940	5589	5750	5784	3675	5742	3071
WBGene00001747	gsp-1	11904	11878	10716	11428	8538	10828	6823
WBGene00001748	gsp-2	26586	24613	22980	24354	38847	38893	40588
WBGene00001749	gst-1	12230	11325	9977	11431	36651	19796	23997
WBGene00001750	gst-2	13	10	10	12	8	11	4
WBGene00001751	gst-3	26	17	30	27	68	64	64
WBGene00001752	gst-4	619	539	552	497	1133	1457	663
WBGene00001753	gst-5	581	507	772	719	1059	1190	836
WBGene00001754	gst-6	128	101	352	321	807	1580	1384
WBGene00001755	gst-7	12629	10683	10201	10932	11494	10176	8413
WBGene00001756	gst-8	8	8	8	9	33	38	28
WBGene00001757	gst-9	120	118	67	73	53	56	43
WBGene00001758	gst-10	618	498	534	547	177	257	183
WBGene00001759	gst-11	33	31	35	28	23	29	18
WBGene00001760	gst-12	139	87	158	173	326	342	184
WBGene00001761	gst-13	587	430	649	474	787	1612	381
WBGene00001762	gst-14	21	23	21	40	211	161	112
WBGene00001763	gst-15	94	97	70	128	1233	1252	902
WBGene00001764	gst-16	230	208	221	224	262	222	154
WBGene00001765	gst-17	8	2	5	4	2	6	1
WBGene00001766	gst-18	5	3	3	6	5	3	2
WBGene00001767	gst-19	7	7	2	1	75	39	24
WBGene00001768	gst-20	457	324	576	509	871	1293	2325
WBGene00001769	gst-21	37	30	30	17	58	47	41
WBGene00001770	gst-22	311	168	971	434	415	596	703
WBGene00001771	gst-23	13	8	12	13	45	23	56
WBGene00001772	gst-24	184	138	185	162	3031	4572	2644
WBGene00001773	gst-25	16	6	7	13	14	11	14
WBGene00001774	gst-26	463	348	484	463	22	44	18
WBGene00001775	gst-27	1510	1182	1681	1486	101	171	145
WBGene00001776	gst-28	208	155	220	205	23	23	10
WBGene00001777	gst-29	65	64	61	58	39	55	54
WBGene00001778	gst-30	67	60	106	123	174	131	129
WBGene00001779	gst-31	6	3	4	11	185	124	141
WBGene00001780	gst-32	32	28	32	30	45	32	21
WBGene00001781	gst-33	39	41	41	50	14	48	20
WBGene00001782	gst-34	32	12	16	18	7	7	10
WBGene00001783	gst-35	74	70	62	45	102	201	99
WBGene00001784	gst-36	1257	1052	1178	1070	843	873	697
WBGene00001785	gst-37	2	3	3	2	54	83	29
WBGene00001786	gst-38	24	23	136	103	359	521	519
WBGene00001787	gst-39	277	227	400	359	882	884	680
WBGene00001788	gst-40	25	16	16	15	62	105	51
WBGene00001789	gst-41	117	99	144	115	28	40	10
WBGene00001790	gst-42	465	351	468	357	60	73	67
WBGene00001791	gst-43	258	222	195	223	613	555	458
WBGene00001792	gst-44	110	114	101	116	96	110	94
WBGene00001793	gsy-1	9986	12207	9352	11426	3478	4028	2760
WBGene00001794	gta-1	12281	10362	11596	10626	6252	7783	5533
WBGene00001795	gtl-1	1166	1120	1152	1187	3386	7704	2333
WBGene00001796	gtl-2	292	289	294	306	105	188	42
WBGene00001803	lite-1	86	100	98	99	442	458	567
WBGene00001804	gur-3	6	5	6	6	6	9	6
WBGene00001805	gur-4	23	29	24	17	32	48	22
WBGene00001806	gur-5	24	12	11	16	23	21	13
WBGene00001808	gut-2	3085	2543	2373	2399	1537	1089	1236
WBGene00001811	haf-1	309	280	242	279	256	241	201
WBGene00001812	haf-2	7984	8145	6999	9318	10587	11578	8542
WBGene00001813	haf-3	4415	4073	3366	3732	3936	4067	2320
WBGene00001814	haf-4	988	915	780	887	2040	3024	1457
WBGene00001815	hmt-1	4573	4730	3970	4285	3012	3435	2306
WBGene00001816	haf-6	1489	1399	1268	1321	310	337	156
WBGene00001817	haf-7	1187	1056	1302	1290	2264	3283	1916
WBGene00001818	haf-8	0	1	0	1	2	2	0
WBGene00001819	haf-9	475	373	422	465	256	251	156
WBGene00001820	ham-1	927	704	1346	1116	1546	1279	835
WBGene00001821	ham-2	643	485	668	435	401	871	506
WBGene00001823	hap-1	720	570	548	561	733	779	796
WBGene00001824	hbl-1	1067	528	2598	1244	2317	936	1622
WBGene00001827	hcf-1	16548	16475	13413	14988	18619	19027	11687
WBGene00001828	hch-1	392	195	761	420	59	227	220
WBGene00001829	hcp-1	18923	19924	15270	17550	12721	14150	10160
WBGene00001830	hcp-2	12156	11971	9872	10841	11671	13078	8093
WBGene00001831	hcp-3	6290	5841	4564	5299	7275	6809	5873
WBGene00001832	hcp-4	9377	9465	7907	8831	7503	9523	5917
WBGene00001833	hcp-6	12427	12203	10364	11474	5196	6397	3779
WBGene00001834	hda-1	14373	14022	11868	13591	10300	11600	6241
WBGene00001835	hda-2	3776	3222	2831	3113	3347	3242	1965
WBGene00001836	hda-3	5430	5239	4309	4985	3688	3894	2390
WBGene00001837	hda-4	2331	2394	2471	2767	2698	4758	3799
WBGene00001838	hda-10	2556	2715	2160	2454	2709	3051	2336
WBGene00001839	hdl-1	25	16	16	17	9	12	3
WBGene00001840	hel-1	37343	35593	31357	34485	41431	41871	35197
WBGene00001841	hen-1	27	18	22	27	13	22	12
WBGene00001842	her-1	49	40	45	34	154	166	137
WBGene00001843	hgo-1	2268	2191	2222	2208	1197	1654	1070
WBGene00001844	hid-1	1747	1447	1678	1532	2714	3902	2457
WBGene00001851	hif-1	9549	9091	8567	9078	9422	14189	12761
WBGene00001852	hil-1	527	435	541	526	2526	3382	2113
WBGene00001853	hil-2	9501	7376	9872	8802	3707	4946	3598
WBGene00001854	hil-3	4703	3309	4781	3888	1266	1557	1131
WBGene00001855	hil-4	20524	19822	15038	17410	12074	10747	9390
WBGene00001856	hil-5	15707	15701	11562	13435	8128	7736	6301
WBGene00001857	hil-6	82	49	86	79	87	47	48
WBGene00001858	hil-7	416	201	965	441	69	96	57
WBGene00001859	hil-8	13	16	1	8	38	34	33
WBGene00001860	him-1	14833	15859	12954	14421	10141	12047	6551
WBGene00001862	him-3	3896	3341	2915	3082	3602	3073	1937
WBGene00001863	him-4	2574	2638	2593	2915	3478	2993	4458
WBGene00001864	him-5	1154	944	838	865	703	594	579
WBGene00001865	him-6	2863	2833	2167	2515	1323	1685	841
WBGene00001867	him-8	3075	2636	2385	2494	1725	1471	1223
WBGene00001869	him-10	5942	5715	4872	5273	4115	3810	2463
WBGene00001872	him-14	1109	1036	815	895	599	550	344
WBGene00001874	him-17	8689	8085	6461	7171	6980	7312	5251
WBGene00001875	his-1	15	19	19	9	307	278	385
WBGene00001876	his-2	21	9	14	17	137	130	172
WBGene00001877	his-3	25	32	23	32	325	292	338
WBGene00001878	his-4	14	10	13	12	133	115	141
WBGene00001879	his-5	17	16	15	15	108	113	122
WBGene00001880	his-6	45	37	41	33	106	96	110
WBGene00001881	his-7	12	19	14	8	61	53	58
WBGene00001882	his-8	29	31	19	16	46	37	39
WBGene00001883	his-9	0	0	0	0	4	5	4
WBGene00001884	his-10	0	0	0	0	0	0	0
WBGene00001885	his-11	8	9	6	8	343	485	718
WBGene00001886	his-12	0	0	0	0	0	0	0
WBGene00001887	his-13	0	0	0	0	1	0	0
WBGene00001888	his-14	0	0	0	0	0	0	0
WBGene00001889	his-15	0	0	0	0	1	0	0
WBGene00001890	his-16	0	2	2	5	54	98	135
WBGene00001891	his-17	7	3	4	2	30	18	51
WBGene00001892	his-18	4	6	2	5	85	82	86
WBGene00001893	his-19	0	0	0	0	0	0	0
WBGene00001894	his-20	0	0	0	0	0	0	0
WBGene00001895	his-21	0	0	0	0	0	0	0
WBGene00001896	his-22	0	0	0	0	0	0	0
WBGene00001898	his-24	13966	9024	17395	12838	4546	5881	4040
WBGene00001899	his-25	5	13	8	9	72	208	224
WBGene00001900	his-26	0	0	0	0	0	1	2
WBGene00001901	his-27	0	0	0	0	0	0	0
WBGene00001902	his-28	0	0	0	0	0	0	0
WBGene00001903	his-29	0	0	0	0	0	0	0
WBGene00001904	his-30	0	0	0	0	0	0	0
WBGene00001905	his-31	32	38	41	39	56	64	67
WBGene00001906	his-32	236	152	161	184	356	424	469
WBGene00001907	his-33	0	0	0	0	0	0	0
WBGene00001908	his-34	0	0	0	0	0	0	0
WBGene00001909	his-35	2312	2184	1946	1987	7424	7717	8387
WBGene00001910	C50F4.6	3399	2509	2910	2641	6979	6862	6016
WBGene00001911	his-37	4070	3335	3293	3180	8805	9499	11171
WBGene00001912	his-38	99	69	74	65	65	61	54
WBGene00001913	his-39	0	0	0	0	0	0	0
WBGene00001914	his-40	170	137	115	121	87	75	77
WBGene00001915	his-41	1846	1522	1502	1400	3002	3598	2548
WBGene00001916	his-42	3	4	8	8	4	8	9
WBGene00001917	his-43	0	0	0	0	0	0	0
WBGene00001918	his-44	0	0	0	0	7	5	8
WBGene00001919	his-45	18	15	10	14	11	20	36
WBGene00001920	his-46	0	0	0	2	2	2	2
WBGene00001921	his-47	10	4	2	6	10	4	12
WBGene00001922	his-48	137	141	78	130	412	278	453
WBGene00001923	his-49	0	0	0	0	0	0	0
WBGene00001924	his-50	0	0	0	0	0	0	0
WBGene00001925	his-51	0	0	0	0	0	0	0
WBGene00001926	his-52	0	0	0	0	0	0	0
WBGene00001927	his-53	0	0	0	0	0	0	0
WBGene00001928	his-54	0	0	0	0	0	0	0
WBGene00001929	his-55	0	0	0	0	1	1	0
WBGene00001930	his-56	0	0	0	0	0	1	1
WBGene00001931	his-57	22	18	18	19	31	41	47
WBGene00001932	his-58	1	0	0	0	0	0	1
WBGene00001933	his-59	346	351	247	302	895	682	1155
WBGene00001934	his-60	500	466	297	370	2397	2874	2544
WBGene00001935	his-61	468	411	296	315	603	514	598
WBGene00001936	his-62	279	243	143	196	919	657	999
WBGene00001937	his-63	170	147	106	127	338	267	417
WBGene00001938	his-64	106	78	75	78	749	710	1128
WBGene00001939	his-65	4	9	5	3	4	3	11
WBGene00001940	his-66	27	22	16	15	8	6	7
WBGene00001941	his-67	204	182	144	153	710	436	527
WBGene00001942	his-68	1450	1276	920	1011	1365	926	988
WBGene00001943	his-69	7	2	3	5	13	23	9
WBGene00001944	his-70	3	3	11	5	9	7	5
WBGene00001945	his-71	1391	1123	1584	1394	4838	5395	6254
WBGene00001946	his-72	23432	20283	21297	21695	34662	41484	32491
WBGene00001947	his-73	39	29	29	24	167	165	161
WBGene00001948	hlh-1	170	80	201	126	138	183	187
WBGene00001949	hlh-2	4254	3823	3770	3920	4340	4038	2148
WBGene00001950	hlh-3	326	235	311	258	754	631	393
WBGene00001951	hlh-4	16	15	16	23	38	34	12
WBGene00001952	hlh-6	27	26	47	30	105	85	45
WBGene00001953	hlh-8	16	18	38	18	13	26	39
WBGene00001954	hlh-10	7	7	7	7	14	9	15
WBGene00001955	hlh-11	3090	2718	3034	3068	3522	4363	3493
WBGene00001956	hlh-12	22	15	21	14	32	86	60
WBGene00001957	hlh-13	5	3	6	3	13	5	11
WBGene00001958	hlh-14	159	96	189	143	168	128	84
WBGene00001959	hlh-15	4	0	3	2	5	0	3
WBGene00001960	hlh-16	37	27	69	27	12	10	12
WBGene00001961	hlh-17	2	2	4	1	0	1	2
WBGene00001962	hlh-19	1	0	0	3	3	4	3
WBGene00001963	btb-1	125	89	60	79	157	186	158
WBGene00001964	hlh-25	2	2	1	1	0	1	0
WBGene00001965	hlh-26	2	1	6	0	3	1	1
WBGene00001966	hlh-27	5	6	5	4	0	0	3
WBGene00001967	hlh-28	1	1	0	1	1	14	8
WBGene00001968	hlh-29	3	2	0	1	7	12	10
WBGene00001971	hmg-1.1	28124	23536	27604	24169	21517	24140	17192
WBGene00001972	hmg-1.2	8553	7344	7594	7369	8656	10323	7260
WBGene00001973	hmg-3	11612	11756	8845	10497	9026	9164	4233
WBGene00001974	hmg-4	16305	15051	12923	13879	13179	12801	8455
WBGene00001975	hmg-5	5243	4369	4081	4048	6522	5724	5508
WBGene00001976	hmg-11	3300	2280	4131	3158	5993	6836	5846
WBGene00001977	hmg-12	17303	18149	12604	15410	17196	18154	15789
WBGene00001978	hmp-1	7883	7973	6761	7547	6105	7333	3740
WBGene00001979	hmp-2	9017	8697	7448	8217	5355	5573	4027
WBGene00001980	hmr-1	18167	17621	15754	17533	14254	16981	11822
WBGene00001981	hnd-1	191	161	194	165	719	769	640
WBGene00001983	hoe-1	11091	10439	8573	9796	18462	23669	13747
WBGene00001984	hog-1	37	17	20	16	1	2	7
WBGene00001985	hop-1	2779	2547	1974	2350	2660	2126	1489
WBGene00001986	hot-1	87	74	98	69	86	114	103
WBGene00001987	hot-2	58	60	58	65	55	76	52
WBGene00001988	hot-3	38	25	31	34	67	59	64
WBGene00001989	hot-4	36	39	47	43	84	105	75
WBGene00001990	hot-5	39	28	41	34	41	51	39
WBGene00001991	hot-6	78	61	69	67	68	92	74
WBGene00001992	hot-7	12	6	11	6	9	14	6
WBGene00001993	hpd-1	5766	5924	5667	6002	5599	7736	5228
WBGene00001994	hpk-1	5112	4469	4688	4885	4793	7895	4430
WBGene00001995	hpl-1	455	398	385	373	602	568	453
WBGene00001996	hpl-2	5737	5084	4489	4689	5894	5500	4298
WBGene00001997	hpr-9	1018	938	797	934	608	677	290
WBGene00001998	hpr-17	3559	3077	2420	2747	2071	1808	1280
WBGene00001999	hrp-1	39106	37450	33430	35703	31689	34732	27140
WBGene00002000	hrp-2	28085	30227	26603	28945	19593	25413	16997
WBGene00002001	hars-1	7129	6753	5923	6458	9707	10823	9946
WBGene00002002	hsb-1	5543	4536	4060	4139	4713	4623	3643
WBGene00002003	hse-5	5845	5255	4525	4859	3313	3209	1916
WBGene00002004	hsf-1	7948	7628	6279	7252	5185	5662	3399
WBGene00002005	hsp-1	154608	193080	130600	164219	265818	253774	332623
WBGene00002006	hsp-2	52	35	47	34	39	36	20
WBGene00002007	hsp-3	71873	68437	60649	61075	49946	56088	49175
WBGene00002008	hsp-4	35477	40673	15298	18682	19174	17924	18228
WBGene00002010	hsp-6	31140	37458	32151	38892	124557	86954	146109
WBGene00002011	hsp-12.2	930	782	1150	1027	742	937	990
WBGene00002012	hsp-12.3	217	131	179	129	136	60	125
WBGene00002013	hsp-12.6	112	81	90	62	1426	1328	898
WBGene00002015	hsp-16.1	1	0	0	2	15	8	19
WBGene00002016	hsp-16.2	122	107	65	72	8253	5406	4712
WBGene00002017	hsp-16.11	0	0	0	0	1	1	1
WBGene00002018	hsp-16.41	159	178	71	127	11532	6920	6014
WBGene00002019	hsp-16.48	0	0	0	0	0	1	0
WBGene00002020	hsp-16.49	0	1	0	0	21	23	35
WBGene00002021	hsp-17	799	708	835	718	6582	5226	2822
WBGene00002023	hsp-25	3925	3255	3983	3651	1304	2109	1423
WBGene00002024	hsp-43	2533	2462	2302	2275	3159	3116	2809
WBGene00002025	hsp-60	15965	19554	12869	15363	6418	9374	5237
WBGene00002026	hsp-70	30	62	33	55	22573	16611	14256
WBGene00002027	hsr-9	26796	28627	21505	25145	20783	22292	14575
WBGene00002028	hst-1	4389	4091	3429	3684	3034	2948	1458
WBGene00002029	hst-2	684	500	485	490	673	675	415
WBGene00002030	hst-3.1	82	65	75	68	50	53	40
WBGene00002031	hst-6	1095	881	854	813	1412	1267	1020
WBGene00002032	htp-1	3602	3098	2707	2958	3414	3104	2516
WBGene00002033	htp-2	3245	2795	2601	2689	5267	5472	5053
WBGene00002034	htp-3	4989	4714	3511	4101	6289	6497	4925
WBGene00002035	hum-1	4681	4844	4466	5196	3793	5232	2882
WBGene00002036	hum-2	10386	10752	9500	10954	9742	11993	6637
WBGene00002037	hum-4	724	687	884	869	249	490	232
WBGene00002038	hum-5	3246	3078	3397	3288	1234	1921	1245
WBGene00002039	hum-6	288	232	513	357	86	117	61
WBGene00002040	hum-7	701	668	626	706	588	834	612
WBGene00002041	hum-8	1407	1293	1924	1751	1393	3145	1373
WBGene00002042	hus-1	1553	1201	1126	1029	1576	1358	1275
WBGene00002043	hyl-1	3597	3169	2831	3019	3407	2575	1648
WBGene00002044	hyl-2	2356	2024	1779	1727	1476	1820	930
WBGene00002045	icd-1	30993	28408	22288	25988	35324	31821	35617
WBGene00002046	icln-1	3170	2622	2357	2611	3565	3567	3969
WBGene00002047	icp-1	10339	10278	8304	9535	9459	10775	8324
WBGene00002048	ida-1	2240	2048	2718	2730	5603	6759	7019
WBGene00002050	ifa-1	1638	1649	1739	1865	457	801	499
WBGene00002051	ifa-3	151	71	390	185	7	7	6
WBGene00002052	ifa-4	2328	2056	2445	2177	593	673	582
WBGene00002053	ifb-1	5502	5551	5903	5663	1057	1573	1019
WBGene00002054	ifb-2	2223	2006	2770	2863	1066	876	765
WBGene00002055	ifc-1	350	246	288	280	66	13	19
WBGene00002056	ifc-2	2120	1523	2846	2218	775	839	672
WBGene00002057	ifd-1	204	161	245	202	79	37	20
WBGene00002058	ifd-2	188	126	359	248	85	63	45
WBGene00002059	ife-1	13731	12612	10559	11616	25353	25663	26946
WBGene00002060	ife-2	2567	2195	2249	2235	5110	5476	6019
WBGene00002061	ife-3	13256	13961	10572	12498	10022	10246	9636
WBGene00002062	ife-4	542	404	542	415	587	660	412
WBGene00002063	ife-5	727	633	577	738	720	978	673
WBGene00002064	iff-1	39288	32891	28864	30724	53284	51826	61260
WBGene00002065	iff-2	8979	7011	9059	8388	30228	35526	40693
WBGene00002066	ifg-1	23769	26811	19483	24472	11512	15387	8236
WBGene00002067	ifp-1	47	23	86	56	114	56	42
WBGene00002068	ify-1	15324	14235	11619	12855	11268	10564	9854
WBGene00002069	ikb-1	748	769	1009	1102	2119	2630	2113
WBGene00002070	ile-1	8051	8367	6570	7537	4643	4853	3396
WBGene00002071	ile-2	2811	2535	2353	2501	2990	3495	2752
WBGene00002072	ima-1	9486	7840	6886	7305	7686	6834	4944
WBGene00002073	ima-2	22546	23545	17596	21106	18976	17480	12912
WBGene00002074	ima-3	20265	21022	17423	19433	13721	19355	12639
WBGene00002075	imb-1	11157	11475	9093	10398	6767	7196	4531
WBGene00002076	imb-2	16391	16679	12630	14559	7028	7524	4923
WBGene00002077	imb-3	34581	37994	29145	33222	50257	55996	56575
WBGene00002078	xpo-1	45846	48820	40636	47036	36043	44661	34364
WBGene00002079	xpo-2	20381	21904	16461	19729	12637	14135	10223
WBGene00002080	xpo-3	7098	7187	5499	6587	4391	4309	2049
WBGene00002081	ina-1	3214	2605	3094	3007	2441	3200	1820
WBGene00002083	inf-1	35681	38477	32268	35063	15944	18613	13710
WBGene00002084	ins-1	97	83	117	115	186	191	184
WBGene00002085	ins-2	33	27	54	39	7	5	5
WBGene00002086	ins-3	68	41	69	55	290	178	438
WBGene00002087	ins-4	159	156	157	154	103	121	91
WBGene00002088	ins-5	53	37	54	62	137	114	68
WBGene00002089	ins-6	109	100	107	79	123	143	113
WBGene00002090	ins-7	185	118	199	132	123	420	125
WBGene00002091	ins-8	6	3	4	2	4	14	1
WBGene00002092	ins-9	2	2	2	0	1	7	5
WBGene00002093	ins-10	22	22	35	21	282	268	427
WBGene00002094	ins-11	1	2	3	11	31	63	52
WBGene00002095	ins-12	42	34	3	19	3	7	3
WBGene00002096	ins-13	0	0	0	1	1	0	0
WBGene00002097	ins-14	10	9	13	4	17	16	17
WBGene00002098	ins-15	0	1	0	2	1	0	0
WBGene00002099	ins-16	1	1	1	1	5	6	2
WBGene00002100	ins-17	334	274	349	359	898	1106	1165
WBGene00002101	ins-18	86	61	89	94	434	334	631
WBGene00002102	ins-19	3	2	1	0	9	34	40
WBGene00002103	ins-20	2	5	5	22	181	124	304
WBGene00002104	ins-21	4	2	2	1	5	4	4
WBGene00002105	ins-22	57	34	37	41	330	289	281
WBGene00002106	ins-23	44	34	65	50	324	346	562
WBGene00002107	ins-24	28	18	31	27	40	34	38
WBGene00002108	ins-25	3	3	5	0	7	6	8
WBGene00002109	ins-26	89	90	95	96	91	113	59
WBGene00002110	ins-27	41	22	47	25	10	5	7
WBGene00002111	ins-28	117	72	124	117	87	81	63
WBGene00002112	ins-29	33	26	43	35	53	89	77
WBGene00002113	ins-30	37	22	49	27	74	53	54
WBGene00002114	ins-31	6	0	4	21	0	1	0
WBGene00002115	ins-32	3	3	1	2	3	2	1
WBGene00002116	ins-33	9	5	8	10	1	7	1
WBGene00002117	ins-34	473	339	512	379	1156	974	580
WBGene00002118	ins-35	18	16	33	18	61	66	34
WBGene00002119	ins-36	11	3	8	3	77	57	59
WBGene00002120	ins-37	38	23	23	18	71	77	72
WBGene00002121	ins-38	1	1	0	0	0	2	0
WBGene00002123	inx-1	231	180	290	263	186	253	179
WBGene00002124	inx-2	4511	3679	4287	4108	5780	6680	4041
WBGene00002125	inx-3	13025	11014	11935	11792	9020	9317	5681
WBGene00002127	inx-5	703	515	881	707	615	934	712
WBGene00002128	inx-6	114	85	151	107	43	53	58
WBGene00002129	inx-7	1177	1163	1089	1234	2398	2472	1965
WBGene00002130	inx-8	6323	5682	5443	5591	3699	4605	2977
WBGene00002131	inx-9	1100	854	970	931	1869	1732	1767
WBGene00002132	inx-10	336	253	378	310	583	633	407
WBGene00002133	inx-11	901	776	664	763	594	554	401
WBGene00002134	inx-12	2358	1828	2453	2087	1728	1695	1397
WBGene00002135	inx-13	1827	1626	2024	1776	969	1027	711
WBGene00002136	inx-14	6486	6365	4854	5735	5819	5256	3429
WBGene00002137	inx-15	900	622	1009	785	359	704	247
WBGene00002138	inx-16	1353	1024	1488	1159	621	812	408
WBGene00002139	inx-17	574	445	588	519	593	1044	891
WBGene00002140	inx-18	18	15	15	23	51	54	54
WBGene00002141	inx-19	53	46	57	59	187	188	109
WBGene00002142	inx-20	14	27	21	28	21	20	8
WBGene00002143	inx-21	2362	2117	1796	1964	2577	2393	1673
WBGene00002144	inx-22	5327	5576	4088	4794	3243	2506	1708
WBGene00002146	ipp-5	330	262	391	302	171	251	164
WBGene00002147	ire-1	10551	10074	7838	9099	6934	7781	4121
WBGene00002148	gon-14	8390	7988	6118	7074	4872	4902	2645
WBGene00002149	irk-1	52	34	32	41	108	106	92
WBGene00002150	irk-2	68	45	50	51	42	74	42
WBGene00002151	irk-3	249	218	222	233	300	446	308
WBGene00002152	iars-1	15501	17295	17687	20091	26135	35867	33972
WBGene00002153	iars-2	4636	4701	4172	4433	2647	2785	2138
WBGene00002162	isp-1	12641	11547	11185	11907	11947	13015	11786
WBGene00002163	ist-1	385	385	451	533	893	1137	618
WBGene00002169	isw-1	16923	17773	13826	15890	13875	14938	10008
WBGene00002173	itr-1	2061	1775	1937	2037	3461	5722	2034
WBGene00002174	itx-1	1580	1535	2081	2057	1244	2312	567
WBGene00002175	jac-1	2527	2679	2592	2758	1860	2301	1424
WBGene00002176	jip-1	339	325	402	333	609	766	517
WBGene00002177	jkk-1	36	18	23	23	50	91	42
WBGene00002178	jnk-1	86	69	126	92	107	133	113
WBGene00002179	jph-1	1042	840	1153	1050	1158	1259	1191
WBGene00002180	jtr-1	1659	1402	1185	1330	1772	1539	1605
WBGene00002181	kal-1	680	469	808	673	662	652	414
WBGene00002182	kap-1	184	109	216	181	513	817	468
WBGene00002183	kat-1	11655	11840	10456	11402	4395	4815	3669
WBGene00002184	kel-1	195	166	189	170	505	384	540
WBGene00002185	kel-3	3231	2543	2561	2562	3290	4430	3450
WBGene00002186	kel-10	4	12	19	13	30	44	19
WBGene00002187	kgb-1	846	754	1080	997	1620	2402	1921
WBGene00002188	kgb-2	287	176	516	562	147	167	113
WBGene00002189	kin-1	2805	2471	2910	2712	2710	3926	2949
WBGene00002190	kin-2	3844	3336	3950	3531	3222	5327	3118
WBGene00002191	kin-3	19180	18617	16019	16988	24475	27515	25941
WBGene00002192	kin-4	15396	17459	12476	15879	9991	12340	6766
WBGene00002193	kin-5	2	3	8	10	19	44	52
WBGene00002194	kin-6	4	6	6	3	4	0	2
WBGene00002195	kin-9	69	65	82	54	196	287	157
WBGene00002196	kin-10	16010	14834	13255	14105	21411	23479	24371
WBGene00002198	kin-14	215	208	204	218	959	1068	1426
WBGene00002199	kin-15	164	143	134	127	128	137	131
WBGene00002200	kin-16	210	157	198	104	291	133	223
WBGene00002201	kin-18	13631	13158	10845	12129	10405	9651	6186
WBGene00002202	kin-19	23812	24330	21480	23812	21788	28707	30605
WBGene00002203	kin-20	2843	2475	2754	2675	2621	3080	1846
WBGene00002204	kin-21	1	3	2	5	4	1	0
WBGene00002205	kin-23	1	1	1	2	0	1	0
WBGene00002206	kin-24	2	1	6	1	3	5	0
WBGene00002207	sid-3	3619	3838	3486	4033	3125	3778	2358
WBGene00002208	kin-26	2	1	2	2	4	3	3
WBGene00002210	kin-29	1121	995	1025	1046	1580	2164	1437
WBGene00002211	kin-30	55	40	37	28	63	67	77
WBGene00002212	kin-31	31	20	16	17	13	32	19
WBGene00002213	kin-32	998	786	923	940	865	990	529
WBGene00002214	klc-1	8841	8057	5980	6778	5017	5031	3763
WBGene00002215	klc-2	3741	3297	4240	4201	8547	11080	10763
WBGene00002216	klp-3	508	435	498	468	372	377	302
WBGene00002217	klp-4	1592	1403	1612	1519	3323	5429	4467
WBGene00002218	klp-6	37	28	26	25	163	162	97
WBGene00002219	klp-7	6664	7403	5416	6861	5659	6998	5021
WBGene00002220	klp-8	778	704	632	697	1394	1862	1981
WBGene00002221	klp-10	2451	2405	1828	2133	1751	1755	1766
WBGene00002222	klp-11	379	234	506	352	540	806	587
WBGene00002223	klp-12	9041	9074	7855	8832	6750	8965	3693
WBGene00002224	klp-13	30	26	45	24	96	119	91
WBGene00002225	klp-15	9938	10034	6956	8818	3750	3698	2966
WBGene00002226	klp-16	9468	9390	6599	8373	5396	6055	5053
WBGene00002227	klp-17	1	2	4	7	3	7	3
WBGene00002228	klp-18	8906	9229	7297	8624	9617	10131	7762
WBGene00002229	klp-19	16972	16704	12738	14931	12608	13628	9444
WBGene00002230	klp-20	630	528	474	558	666	892	486
WBGene00002231	knl-1	11537	11296	9420	10253	8623	9788	5784
WBGene00002232	kpc-1	3473	3170	3084	3112	5276	12029	3741
WBGene00002233	kqt-1	251	154	302	245	216	237	138
WBGene00002234	kqt-2	649	483	570	528	205	342	267
WBGene00002235	kqt-3	267	255	249	320	85	160	85
WBGene00002238	kars-1	28497	30752	24611	28183	24607	27657	22971
WBGene00002239	ksr-1	1121	909	844	961	1514	1811	1116
WBGene00002240	ksr-2	3962	4064	3249	3703	2238	2910	1258
WBGene00002241	kup-1	4398	3940	3294	3731	4676	4615	2686
WBGene00002242	kvs-1	135	128	95	82	88	131	48
WBGene00002243	lad-2	132	116	173	122	270	249	173
WBGene00002244	laf-1	8185	9249	7279	7934	2972	4162	2684
WBGene00002245	lag-1	8095	7911	6549	7149	5582	6029	3324
WBGene00002246	lag-2	741	663	719	828	257	301	234
WBGene00002247	lam-1	6026	5054	6541	6078	11051	24104	10236
WBGene00002248	lam-3	2095	1533	2756	2020	1268	2674	839
WBGene00002249	lap-1	9600	9653	9436	10409	11849	12617	11390
WBGene00002250	lap-2	15417	17423	14491	16818	13473	16089	13229
WBGene00002251	lat-1	15115	14944	12158	13618	13499	14683	8940
WBGene00002252	lat-2	101	150	134	341	175	329	289
WBGene00002253	lbp-1	6181	4147	7837	6101	22171	27253	21318
WBGene00002254	lbp-2	18445	15768	16940	15662	17943	24127	13465
WBGene00002255	lbp-3	1890	1442	1860	1528	2277	2984	1567
WBGene00002256	lbp-4	3017	2385	2537	2507	3458	3451	3411
WBGene00002257	lbp-5	1379	950	1548	1299	155	259	193
WBGene00002258	lbp-6	11161	9122	11745	10601	4048	5135	4679
WBGene00002259	lbp-7	555	376	545	445	116	357	109
WBGene00002260	lbp-8	77	50	16	23	2	5	3
WBGene00002261	ldb-1	2149	1735	2194	2001	2560	3227	1903
WBGene00002262	ldh-1	3967	3820	3915	4161	13561	19541	13055
WBGene00002263	lea-1	17779	20925	20950	25385	50066	51377	69249
WBGene00002264	lec-1	16516	16810	17330	18474	12182	15582	12063
WBGene00002265	lec-2	9243	9124	11234	10906	66756	110033	100072
WBGene00002266	lec-3	796	688	1017	835	1196	1928	1256
WBGene00002267	lec-4	3813	3303	3830	3646	1423	2096	1701
WBGene00002268	lec-5	5580	5118	4996	4895	5417	8788	9062
WBGene00002269	lec-6	15029	11902	13366	11784	3650	3245	5135
WBGene00002270	lec-7	23	23	29	26	53	60	52
WBGene00002271	lec-8	1852	1627	3052	2211	545	1125	691
WBGene00002272	lec-9	2771	2344	2020	1919	64	48	22
WBGene00002273	lec-10	2973	2555	3630	2929	363	365	190
WBGene00002274	lec-11	1203	1179	1811	1877	496	1125	889
WBGene00002275	lem-2	6143	5660	5155	5328	10434	10518	9997
WBGene00002276	lem-3	7496	7407	6504	7100	4819	4923	3085
WBGene00002280	let-2	25764	24635	29876	28263	3685	5600	3508
WBGene00002282	let-4	254	108	345	242	35	112	47
WBGene00002285	let-7	0	0	0	0	2	9	7
WBGene00002295	let-19	6305	5690	5409	5715	5362	6669	3380
WBGene00002297	ect-2	10829	11569	8790	10634	8750	9843	6379
WBGene00002299	let-23	713	596	1067	1019	1010	1944	1006
WBGene00002324	let-49	2279	2028	1675	1747	1608	1638	1058
WBGene00002335	let-60	5637	4924	4543	4837	4263	5353	2731
WBGene00002344	let-70	20645	19125	16732	18020	29653	32646	31085
WBGene00002348	myo-1	4076	3505	4600	4183	2723	4172	3082
WBGene00002363	let-92	25811	25000	20874	23255	18569	21452	13085
WBGene00002368	let-99	7593	7751	5598	6608	7145	7383	5818
WBGene00002393	lpr-1	29	22	44	42	39	66	38
WBGene00002497	let-268	538	395	713	552	492	808	629
WBGene00002583	let-363	12990	14326	11194	12971	7921	9778	4836
WBGene00002601	let-381	59	52	79	63	80	97	60
WBGene00002632	let-413	2905	2456	2958	2781	2564	3294	1805
WBGene00002637	let-418	22929	23922	19858	22379	15429	21338	11939
WBGene00002694	let-502	13869	14655	11910	13251	11920	15915	8568
WBGene00002696	let-504	8843	8171	6736	7313	9013	10901	10440
WBGene00002717	let-526	17210	18649	15337	17905	12451	18054	8534
WBGene00002783	let-607	9886	10166	7310	8594	9013	12911	7849
WBGene00002827	let-653	370	264	422	367	303	471	247
WBGene00002845	let-711	38557	45264	34446	41203	18909	24762	13368
WBGene00002850	let-716	8673	8803	7555	8371	6694	9612	3311
WBGene00002855	let-721	16510	15700	13494	14858	9521	11309	6931
WBGene00002879	let-754	8887	7939	6632	7391	4468	4120	2957
WBGene00002881	let-756	361	335	388	321	215	370	225
WBGene00002889	let-765	15194	15190	12666	14244	13379	16343	9463
WBGene00002891	let-767	13961	11825	13642	13064	8604	8610	7257
WBGene00002915	let-805	3176	3099	4058	3807	933	1512	912
WBGene00002957	let-858	8726	8655	7335	7866	7148	7835	5771
WBGene00002974	lev-1	113	71	89	92	161	184	202
WBGene00002975	lev-8	43	41	57	35	37	44	43
WBGene00002976	lev-9	64	51	36	40	130	238	184
WBGene00002977	lev-10	587	478	642	576	352	493	418
WBGene00002978	lev-11	41313	33881	44617	42270	10188	15053	15747
WBGene00002979	lfe-2	1459	1293	2157	2204	2755	6637	6002
WBGene00002980	lgg-1	44919	36443	43244	41687	62980	70555	71157
WBGene00002981	lgg-2	14615	13579	13385	13518	24874	30437	30434
WBGene00002982	lgg-3	1675	1595	1356	1428	2841	2330	2467
WBGene00002983	lgx-1	131	87	224	122	48	78	36
WBGene00002985	lig-1	10165	9984	8213	9255	12100	11979	7767
WBGene00002986	lig-4	1753	1539	1336	1464	1511	1567	886
WBGene00002987	lim-4	14	17	36	29	16	21	18
WBGene00002988	lim-6	121	96	118	99	251	714	419
WBGene00002989	lim-7	592	501	534	533	354	405	309
WBGene00002990	lin-1	696	653	883	802	494	847	777
WBGene00002991	lin-2	414	332	383	341	407	523	311
WBGene00002992	lin-3	2838	2889	2165	2531	1990	1853	1028
WBGene00002993	lin-4	0	0	0	0	0	0	0
WBGene00002994	lin-5	11682	11527	9369	10231	11403	12786	9667
WBGene00002996	lin-7	1514	1175	1137	1127	827	788	498
WBGene00002997	lin-8	1047	915	873	846	801	726	671
WBGene00002998	lin-9	3980	3884	3103	3480	3100	3038	1668
WBGene00002999	lin-10	2251	1885	2298	2054	2133	2838	2298
WBGene00003000	lin-11	142	144	243	175	276	413	373
WBGene00003001	lin-12	722	574	773	794	1656	1754	665
WBGene00003002	lin-13	11263	11643	9637	11133	11119	15221	7615
WBGene00003003	lin-14	343	278	446	382	946	1306	907
WBGene00003006	lin-17	481	417	621	503	510	829	501
WBGene00003007	lin-18	272	251	254	231	285	367	224
WBGene00003008	lin-22	37	28	34	38	32	21	14
WBGene00003009	lin-23	9734	10052	8117	9178	6019	7325	3808
WBGene00003010	lin-24	3663	3287	3248	3794	4082	3400	2598
WBGene00003011	lin-25	1987	1683	1654	1631	1200	1366	755
WBGene00003012	lin-26	6741	6464	5646	6194	7839	7260	4745
WBGene00003014	lin-28	4898	3873	3738	3721	8682	8633	7952
WBGene00003015	lin-29	236	196	166	162	272	313	201
WBGene00003017	lin-31	59	47	43	37	16	18	17
WBGene00003018	lin-32	57	18	60	32	19	14	18
WBGene00003019	lin-33	634	732	805	1794	1774	2467	1657
WBGene00003020	lin-35	9418	8460	7517	7832	6715	6719	3408
WBGene00003021	lin-36	8839	8642	7505	8152	5510	6362	3385
WBGene00003022	lin-37	4072	3505	3053	3333	4480	3985	3843
WBGene00003024	lin-39	328	287	373	321	340	319	308
WBGene00003025	lin-40	9760	10266	8919	10424	8840	10917	7704
WBGene00003026	lin-41	20433	25870	17524	23519	5876	8121	3280
WBGene00003029	lin-44	59	51	71	45	100	129	106
WBGene00003030	lin-45	7173	7952	6003	7133	4162	3957	2812
WBGene00003031	lin-46	94	69	78	78	56	93	50
WBGene00003033	lin-48	46	22	34	31	78	125	67
WBGene00003034	lin-49	5823	6001	4999	5515	6929	8241	4511
WBGene00003035	lin-52	2538	2113	2057	2212	4023	3573	4028
WBGene00003036	lin-53	23495	22814	19674	21789	25240	25233	20310
WBGene00003037	lin-54	6135	5838	4730	5418	6012	5668	3928
WBGene00003038	lin-56	1757	1455	1167	1307	1642	1531	1288
WBGene00003039	lin-58	0	0	0	0	0	1	0
WBGene00003040	lin-59	4982	4989	5638	6195	5073	7981	4718
WBGene00003041	lin-61	4797	4385	3751	3992	4095	4378	2733
WBGene00003043	lip-1	5735	6269	4478	5521	2047	2173	1222
WBGene00003044	lir-1	4674	4003	3749	3799	7745	7093	6883
WBGene00003045	lir-2	1880	1501	1400	1572	1231	1115	715
WBGene00003046	lir-3	261	231	203	229	216	152	136
WBGene00003047	lis-1	6421	7164	5613	6620	8381	9352	10859
WBGene00003048	lit-1	5885	6223	5542	6011	5784	9466	5633
WBGene00003052	lmn-1	27816	27225	23578	25921	24354	26435	20018
WBGene00003053	lmp-1	16658	14977	14012	14572	18377	19782	15307
WBGene00003055	lon-1	2940	2678	2144	2169	371	595	340
WBGene00003056	lon-2	1007	745	769	788	1415	1392	1014
WBGene00003057	lon-3	8	2	22	2	1	1	0
WBGene00003058	lov-1	7	2	7	5	12	15	24
WBGene00003059	lpd-2	1865	1480	1318	1352	1881	1621	1272
WBGene00003060	lpd-3	4168	4019	3168	3604	2556	2973	1183
WBGene00003061	lpd-5	5816	5072	4979	5071	5488	5582	5689
WBGene00003062	lpd-6	7203	7207	5877	6453	7663	10609	8404
WBGene00003063	lpd-7	9721	8643	8624	8673	61853	72250	75261
WBGene00003064	lpd-8	4294	3410	3162	3140	4949	3727	4516
WBGene00003065	lpd-9	5056	4542	4248	4369	3801	3895	3337
WBGene00003066	lpl-1	3797	3352	3021	3215	4085	4244	3525
WBGene00003067	lrg-1	530	624	414	508	435	490	243
WBGene00003068	lrk-1	3058	2918	2708	2771	2418	3038	1617
WBGene00003071	lrp-1	6235	6674	6403	7920	7119	9118	4607
WBGene00003072	lrp-2	4638	4054	4749	4709	5727	6710	3815
WBGene00003073	lars-1	12374	13608	12108	13087	44181	56801	57545
WBGene00003074	lars-2	2545	2570	2080	2372	1847	1648	631
WBGene00003075	lrx-1	41	28	43	39	66	74	41
WBGene00003076	lsm-1	4144	3279	2957	3079	3427	2857	2730
WBGene00003077	lsm-3	3078	2381	2371	2233	3273	2858	3233
WBGene00003078	lsm-4	4166	3474	3196	3085	4177	3871	3572
WBGene00003079	lsm-5	3465	2985	2744	2820	5311	5183	4801
WBGene00003080	lsm-6	2314	1882	1741	1671	2076	1757	1761
WBGene00003081	lsm-7	4415	3329	3373	3199	4220	4010	4594
WBGene00003082	lsm-8	3738	2951	2725	2874	2688	2509	2012
WBGene00003083	lst-1	10158	9627	7706	8736	6266	6190	4285
WBGene00003084	lst-2	2334	2439	2184	2325	1468	2095	1149
WBGene00003085	lst-3	23751	24171	20854	22734	20107	23327	16359
WBGene00003086	lst-4	8168	8777	7345	8914	7151	9110	6136
WBGene00003087	lsy-2	3131	2796	2796	2957	1928	2282	1378
WBGene00003088	lsy-6	0	0	0	0	0	0	0
WBGene00003089	ltd-1	363	306	378	331	991	1242	729
WBGene00003090	lys-1	9609	7174	9405	7184	2488	1479	809
WBGene00003091	lys-2	4014	2989	3635	2745	450	241	197
WBGene00003092	lys-3	159	103	211	115	189	449	402
WBGene00003093	lys-4	7550	5178	6158	4090	125	36	40
WBGene00003094	lys-5	33	19	36	43	13	11	10
WBGene00003095	lys-6	94	88	26	21	4	8	6
WBGene00003096	lys-7	11802	8965	1701	1563	41127	40985	32920
WBGene00003097	lys-8	10056	9010	7217	7666	4124	4768	4495
WBGene00003098	lys-9	4	0	2	2	0	0	0
WBGene00003099	lys-10	291	252	16	8	7	0	1
WBGene00003100	mab-3	30	20	19	22	76	72	58
WBGene00003102	mab-5	79	56	84	60	164	292	252
WBGene00003104	mab-7	86	61	81	69	30	37	22
WBGene00003106	mab-9	24	18	26	22	13	36	16
WBGene00003107	mab-10	621	579	556	565	226	412	246
WBGene00003111	mab-20	3453	2984	3360	3196	5132	5996	3724
WBGene00003112	mab-21	168	118	149	88	144	243	148
WBGene00003114	mab-23	2	3	0	3	9	11	3
WBGene00003119	mac-1	3303	3244	2849	2920	2649	3223	1981
WBGene00003123	mag-1	11234	9243	9225	9156	13904	14095	12076
WBGene00003124	mai-1	493	469	355	457	4070	3910	6704
WBGene00003129	map-1	3746	3881	3058	3489	3709	4000	3848
[truncated: 44,749 more rows]
