# Supplementary material for: An intestinal microRNA modulates the homeostatic adaptation to chronic oxidative stress in C. elegans
Source: Aging (Albany NY). 2016 Sep 12;8(9):1979–96. doi: 10.18632/aging.101029 (PMC5076448; doi:10.18632/aging.101029)
Supplement: Supplementary file 7 [file aging-08-1979-s007.xlsx]

## Sheet: S6_Strains_Used
Genotype	Notes	Our Lab stock#
wild-type N2 Bristol		MK13/15-1
mir-60(n4947)	Original strain: MT16471 (0x BC), 6x BC into our own wild-type N2	MK14-16
mir-243(n4759)	Original strain: MT15454 (0x BC), 6x BC into our own wild-type N2	MK14-17
spe-9(hc88)	Original strain: BA671 (>2x BC), additional 11x BC into our own wild-type N2	MK14-19
mir-60(n4947);spe-9(hc88)	Original strains: mir-60(n4947; 4x BC), spe-9(hc88; 9x BC)	MK13-110
glp-4(bn2)	Original strain: SS104 (2x BC), additional 4x BC into our own wild-type N2	MK12-165
mir-60(n4947);glp-4(bn2)	Original strains: mir-60(n4947; 4x BC), glp-4(bn2, 6x BC)	MK14-14
mir-60::gfp(maIs276)	Original strain: VT1733 (0x BC), 4x BC into our own wild-type N2	MK14-42
mir-60::gfp(maIs276);glp-4(bn2)	Original strains: mir-60::gfp(maIs276; 0x BC), glp-4(bn2, 6x BC)	MK13-105
mir-243::gfp(maIs177)	Original strain: VT1474 (0x BC)	MK12-137
mir-243::gfp(maIs177);glp-4(bn2)	Original strains: mir-243::gfp(maIs177; 0x BC) , glp-4(bn2, 6x BC)	MK14-25
ttTi4348;unc-119(ed3)	Original strain: EG6701 [ttTi4348;unc-119(ed3)], balanced by oxEx1580 (eft-3p::GFP + Cbr-unc-119)	MK14-34
mir-60(+/+)	mir-60 rescue line made by MosSCI, 4x BC into our own wild-type N2, unc-119(ed3) was removed by outcrossing	MK15-16
mir-60(+/+);mir-60-/-(n4947)	Original strain: MK15-16, further crossed into mir-60(n4947; 4x BC)	MK15-35
daf-16(mgDf50)	Original strain: GR1307 (3x BC), additional 2x BC into our own wild-type N2	MK12-156
mir-60(n4947);daf-16(mgDf50)	Original strains: mir-60(n4947; 4x BC), daf-16(mgDf50; 5x BC)	MK13-115
daf-2(e1370)	Original strain: CB1370 (0x BC), 5x BC into our own wild-type N2	MK12-42
mir-60(n4947);daf-2(e1370)	Original strains: mir-60(n4947; 4x BC), daf-2(e1370; 5x BC)	MK13-111
skn-1(zu67)/nT1[unc-?(n754) let-?]	Original strain: EU1 (8x BC), additional 2x BC into our own wild-type N2	MK14-28
mir-60(n4947);skn-1(zu67)/nT1[unc-?(n754) let-?]	Original strains: mir-60(n4947; 6x BC), MK14-28 [skn-1(zu67)/nT1[unc-?(n754) let-?], 10x BC]	MK14-31
skn-1(zu135)/nT1[unc-?(n754) let-?]	Original strain: EU31 (3x BC), additional 3x BC into our own wild-type N2	MK14-29
mir-60(n4947);skn-1(zu135)/nT1[unc-?(n754) let-?]	Original strains: mir-60(n4947; 6x BC), MK14-29 [skn-1(zu135)/nT1[unc-?(n754) let-?], 6x BC]	MK14-32
