# Supplementary material for: An intestinal microRNA modulates the homeostatic adaptation to chronic oxidative stress in C. elegans
Source: Aging (Albany NY). 2016 Sep 12;8(9):1979–96. doi: 10.18632/aging.101029 (PMC5076448; doi:10.18632/aging.101029)
Supplement: Supplementary file 8 [file aging-08-1979-s008.xlsx]

## Sheet: S7_PrimerSeq
Primer name	Sequence (5'->3')	Purpose	Description
mir-60_n4947-F1	GGTGAATCACTTGACTGTAG	genotyping for mir-60(n4947)	PCR using F1/R1 and F1/R2 primer sets yields 1.1 kb and 740 bp bands in wild-type animals, respectively. PCR using F1/R1 and F1/R2 primer sets yields 330 bp band and no product in mir-60 mutants n4947 allele, respectively. F11 primer is located outside of the mir-60 fragment, which was used for the rescue experiment. F11 primer was used for genotyping instead of F1 primer to distinguish the mir-6…
mir-60_4947-R1	GTATCGATCTATATGTGGACTG	genotyping for mir-60(n4947)
mir-60_n4947-R2	CCGGGTAAATATCATATACTG	genotyping for mir-60(n4947)
mir-60_n4947-F11	AGACAACTGCAAGTTGCATC	genotyping for mir-60(n4947)
mir-243_n4759-F1	CTGAATATAAAGCCCTCTCACAC	genotyping for mir-243(n4759)	PCR using F1/R1 primers yields a shoter band, while PCR using F1/R2 primers yields no band in mir-243 mutants.
mir-243_n4759-R1	TACGACGAAACGAACAAATTACTTTC	genotyping for mir-243(n4759)
mir-243_n4759-R2	CAGTTTTTTCCCCTAATTTTCCTAGAG	genotyping for mir-243(n4759)
daf-2_e1370-F1	ATTGATCGGAGGGATCGTCT	genotyping for daf-2(e1370)	PCR products amplified with F1/R1 primers were digested with a restriction enzyme BlpI, which produces two bands (400 bp and 200 bp) in wild-type animals, while PCR products from daf-2(e1370) mutants cannot be digested with BlpI, showing a single band of 600 bp.
daf-2_e1370-R1	TCGGGATGAGACTGTCAAGA	genotyping for daf-2(e1370)
daf16_mgDf50_INT_F1	CAATGAGCAATGTGGACAGCTC	genotyping for daf-16(mgDf50)	PCR with INT_F1/INT_R1 primers produces a band in wild-type but not in daf-16 null mgDf50 allele.
daf16_mgDf50_INT_R1	CGTTCCGTCTGGTCGTTGTC	genotyping for daf-16(mgDf50)
skn-1_zu67_dF1	GAATCCATTATAGAATCCTTACGAAAGATCTTC	genotyping for skn-1(zu67)	PCR using dF1/R1 primers produces a band of 220 bp. Treatment of the PCR product with a restriction enzyme Taqa(alpha)I generates digested products (40 bp and 180 bp) in wild-type animals but undigested product (200 bp single band) in skn-1(zu67) mutants. Note that the dF1 primer contains one base mismatch to eliminate a Taq alpha I site closed to zu67 locus.
skn-1_zu67_R1	ACGGTATTGATAGTTGGAATGAGAAGG	genotyping for skn-1(zu67)
skn-1_zu135_F1	CAGCAACCTTGTTCTTTCCTG	genotyping for skn-1(zu135)	PCR using F1/R2 primers yields a band of 670 bp. Treatment of the PCR product with TseI produces digested, two bands (200 bp and 470 bp) in wild-type animals but undigested single band (670 bp) in skn-1(zu135) mutants.
skn-1_zu135_R2	AGCGTCACAGTGACTGCAAC	genotyping for skn-1(zu135)
ce_unc-119_ed3-F1	CTATGTACAAAAATTGCATGCCAGC	genotyping for unc-119(ed3)	PCR using ed3-F1/ ed3-R1 primers produces 820 bp band. Treatment of the PCR product with EcoRV produces a digested product in wild-type animals not in animals having unc-119(ed3) mutation.
ce_unc-119_ed3-R1	CTCGAATTTCCTCCAAGTTTTCAC	genotyping for unc-119(ed3)
L4440-1	ACTATAGGGAGACCGGCAG	RNAi	L4440-1 and/or L4440-2 primers were used for sequencing to check inserts of RNAi clones.
L4440-2	CGACGGCCAGTGAGCGCGC	RNAi
mir-60_MosRes-1	gctagcGATGATACACTTTTTAATTAAAATACAC	MosSCI	Primers of mir-60_MosRes-1 and mir-60_MosRes-2 contain NheI site (gctagc) and KpnI site (ggtacc) in their 5’ ends for subcloning, respectively. The NheI-digested end can be ligated to the SpeI digested end of MosSCI targeting vector pCFJ352.
mir-60_MosRes-2	ggtaccACAAAGCACATCTGATATCATTTTCA	MosSCI
mir-60_ResSeq-F1	GATGGTTGCCTATCACCAAATG	MosSCI	mir-60_ResSeq-F1/R1 primers were used for sequencing to confirm the mir-60 fragment subcloned.
mir-60_ResSeq-R1	CATTTGGTGATAGGCAACCATC	MosSCI
cb-unc-119-R1	CCAATTCATCCCGGTTTCTGTC	MosSCI	PCR amplification with cb-unc-119-R1 and LeftOut1_pCFJ352 primers yield a 1.8 kb product if the transgene, including the mir-60 fragment and cb-unc-119 rescue region, is integrated properly into the targeted region of MosSCI site ttTi4348 on the chromosome I.
LeftOut1_pCFJ352	CACTTGAGCTTACAATAACTTGC	MosSCI
LeftRecomb1_pCFJ352	CTAAGATGTCGGCCACTATAAC	MosSCI	The primers of cb-unc-119-R1, LeftRecomb1_pCFJ352 and RightRecomb1_pCFJ352 were used to distinguish a line having the MosSCI-mediated mir-60 transgene from wild-type animals. PCR amplification using RightRecomb1_pCFJ352 and LeftRecomb1_pCFJ352 yields a short band (300 bp) for animals without the transgene insertion but no product for animals having the insertion in homozygous state, while PCR amp…
RightRecomb1_pCFJ352	CTTCAAAGAAATCGCCGACTTG	MosSCI
StemLoopRT_Univ_R	GTGCAGGGTCCGAGGT	miRNA qRT-PCR	qPCR primer used to detect mature miRNA-derived cDNAs, which are synthesized using stem-loop adapter for each miRNA. This was used with a forward primer specific to each miRNA e.g. miR-60-3p_F
miR-60-3p_RT	GTTGGCTCTGGTGCAGGGTCCGAGGTATTCGCACCAGAGCCAACTGAACT	miRNA qRT-PCR	Stem-loop adapter used for reverse transcription reaction for miR-60-3p, which contains a biding motif of UPL probe# 21
miR-60-3p_F	GGGGGTATTATGCACATTTTCT	miRNA qRT-PCR	qPCR primer for miR-60-3p. This was used with the primer of StemLoopRT_Univ_R
miR-66-5p_RT	GTTGGCTCTGGTGCAGGGTCCGAGGTATTCGCACCAGAGCCAACTCACAT	miRNA qRT-PCR	Stem-loop adapter used for reverse transcription reaction for miR-66-5p, which contains a biding motif of UPL probe# 21
miR-66-5p_F	GGCATGACACTGATTAGGG	miRNA qRT-PCR	qPCR primer for miR-66-5p. This was used with the primer of StemLoopRT_Univ_R
ama-1_RT-UPL141-L1	GCCTACGTCGCCTAGCTACA	qRT-PCR	UPL probe# 141
ama-1_RT-UPL141-R1	ACGTTGGCGATGTTGGAG	qRT-PCR
cdc-42_RT-UPL143-L1	TCAGCGTTGACGCAGAAG	qRT-PCR	UPL probe# 143
cdc-42_RT-UPL143-R1	CATGGAGACAAGGAAGACGTT	qRT-PCR
pmp-3_RT-UPL143-L1	CAAGAGACAAGCTTTCTTCAAGC	qRT-PCR	UPL probe# 143
pmp-3_RT-UPL143-R1	TTGGGTTAGACGTTGATCTGG	qRT-PCR
C38D9.2_RT-UPL151-L1	TGGACAAGGATCGACGTTTA	qRT-PCR	UPL probe# 151
C38D9.2_RT-UPL151-R1	CGGCCTTTTCTCGTTGTTT	qRT-PCR
C40H1.7_RT-UPL148-L1	TGGATTGGGTGAAGATTTGC	qRT-PCR	UPL probe# 148
C40H1.7_RT-UPL148-R1	CACCCATCGAGTACCCAGTT	qRT-PCR
amt-4_RT-UPL156-L1	GGAGTTGGAGCAGGTCTCAT	qRT-PCR	UPL probe# 156
amt-4_RT-UPL156-R1	AGTGGGTCGTCGATCTTCAG	qRT-PCR
asp-17_RT-UPL127-L1	AGTTTAAGATGGATGGGTTTGC	qRT-PCR	UPL probe# 127
asp-17_RT-UPL127-R1	GGAACCCGTGTCGGAAAT	qRT-PCR
clec-70_RT-UPL129-L1	AAACAAGCAACTACTTGGCATTC	qRT-PCR	UPL probe# 129
clec-70_RT-UPL129-R1	GACTTCCGTTATCCCAAGTCAA	qRT-PCR
asp-10_RT-UP158L-L1	GGTCATACAGTCAAGCTCCAAA	qRT-PCR	UPL probe# 158
asp-10_RT-UPL158-R1	AACATATGTGGCTCCAACTGC	qRT-PCR
pgp-1_RT-UPL92-L1	GCACACAAGATCACAAATTGC	qRT-PCR	UPL probe# 92
pgp-1_RT-UPL92-R1	GCCATGGTAACTGAGGAAGG	qRT-PCR
gst-38_RT-UPL160-L1	GGAGAGCTCTGCCGTCAA	qRT-PCR	UPL probe# 160
gst-38_RT-UPL160-R1	AAGCTGGTTGTATGGGGTTTT	qRT-PCR
pgp-9_RT-UPL134-L1	TGATGTTTCAGATGAAGATATTGCT	qRT-PCR	UPL probe# 134
pgp-9_RT-UPL134-R1	CGAGAGTGTTGAGGCCTTCT	qRT-PCR
tsp-1_RT-UPL154-L1	CTGATCCTTCAAACTATTGCTATCAT	qRT-PCR	UPL probe# 154
tsp-1_RT-UPL154-R1	TGTACTTGTAGGTTTTCTTCCTTGAA	qRT-PCR
zip-10_RT-UPL96-L1	CCAGCAATGCTTGCTCAAT	qRT-PCR	UPL probe# 96
zip-10_RT-UPL96-R1	CTTTCAGTTGAAGAGCATCTCG	qRT-PCR
gst-22_RT-UPL150-L1	GGTGGGGTACCATATGAGGAT	qRT-PCR	UPL probe# 150
gst-22_RT-UPL150-R1	ACTGTGAATCGGCCAAATG	qRT-PCR
ugt-62_RT-UPL165-L1	AATGATGGAGTCCGATGATGA	qRT-PCR	UPL probe# 165
ugt-62_RT-UPL165-R1	TTTCTCCGTTTGAGGTCATTC	qRT-PCR
tba-7_RT-UPL133-L1	AAGAGAGCTTTTGTGCATTGG	qRT-PCR	UPL probe# 133
tba-7_RT-UPL133-R1	TCCCCATTATCATTAGCATCG	qRT-PCR
ugt-26_RT-UPL164-L1	AGGATTTCAGCTCAGTTCCTACTC	qRT-PCR	UPL probe# 164
ugt-26_RT-UPL164-R1	GGCGAGACTTGCTTTTGTTT	qRT-PCR
pgp-5_RT-UPL154-L1	AGGCATTAAAAGTTGCAAACG	qRT-PCR	UPL probe# 154
pgp-5_RT-UPL154-R1	TCACCAACAAGTGTGTCCAGA	qRT-PCR
lys-7_RT-UPL102-L1	TGCTTACGCCTTGGATATTTATG	qRT-PCR	UPL probe# 102
lys-7_RT-UPL102-R1	TTGTCCTGCTGGGTTGTATG	qRT-PCR
C14C6.5_RT-UPL120-L1	TGCCCACCTGGCACTACTAT	qRT-PCR	UPL probe# 120
C14C6.5_RT-UPL120-R1	TGGTGCCATTGTCGTAGTTG	qRT-PCR
sod-3_RT-UPL125-L1	CACTGCTTCAAAGCTTGTTCA	qRT-PCR	UPL probe# 125
sod-3_RT-UPL125-R1	ATGGGAGATCTGGGAGAGTG	qRT-PCR
ctl-3_RT-UPL125-L1	TGAAGAATTATTTCGCTGAGGTC	qRT-PCR	UPL probe# 125
ctl-3_RT-UPL125-R1	GCGTGTCCGTGTAGGAGAAG	qRT-PCR
